# Supplementary material
Source: MDPI journal article supplement (https://www.mdpi.com/1996-1073/8/4/2924)
Supplement: s1 [file s1]

## Sheet: Sheet1
#Generation	No.	-->1
#Variable_vector	Fitness_vector	Constraint_violation	Overall_penalty
	SOLAR		HWHB		EHP		GSHP		VCCC		SFAC		HLSB		HLHB		PV		Objective functions
	Type	Quantity	Type	Quantity	Type	Quantity	Type	Quantity	Type	Quantity	Type	Quantity	Type	Quantity	Type	Quantity	Type	Quantity	Life cycle cost (1,000 KRW)	Renewable energy supply (kWh)	GHG emissions (kgCO2eq.)	Constraint_violation	Overall_penalty
	1	74	2	2	1	22	8	3	10	2	29	0	10	0	5	0	6	197	9.16562e+06	203223	473590	0	0
	4	4	1	4	5	7	6	3	3	3	0	0	7	0	3	1	17	35	9.40476e+06	323774	516924	0	0
	3	160	0	4	3	21	0	7	8	0	25	0	12	0	3	0	15	37	7.98708e+06	141472	472858	0	0
	0	69	0	5	3	24	1	5	4	1	28	0	5	0	1	0	5	121	8.71511e+06	94530.8	477939	0	0
	0	166	0	5	3	16	8	3	1	1	17	0	16	0	1	1	6	26	8.31224e+06	124456	477490	0	0
	0	76	4	1	5	2	4	6	1	5	12	0	5	0	0	1	7	62	1.01667e+07	742871	525421	0	0
	1	13	1	3	5	0	4	7	3	1	12	0	17	0	4	0	3	198	9.46007e+06	407042	525950	0	0
	2	118	1	4	4	3	9	2	3	4	1	1	8	1	8	0	0	38	9.67882e+06	692478	517499	0	0
	1	41	4	1	6	6	8	2	8	3	13	0	0	3	8	0	18	167	9.4364e+06	414297	500067	0	0
	0	182	2	2	0	8	6	4	12	1	22	0	16	0	2	1	6	8	8.54079e+06	127637	487073	0	0
	4	93	2	2	2	13	2	3	5	2	24	0	5	1	8	0	16	144	8.38239e+06	159217	473440	0	0
	2	141	0	4	3	7	1	4	10	3	21	0	4	2	1	0	6	110	9.2903e+06	525485	484480	0	0
	3	43	0	5	4	5	1	4	10	0	16	1	0	8	5	0	1	112	9.02941e+06	508743	522162	0	0
	1	202	2	2	6	14	0	8	6	1	16	0	14	0	6	0	5	0	8.47872e+06	130429	483100	0	0
	4	48	2	2	1	9	4	7	9	1	16	0	2	0	6	0	10	176	9.08691e+06	133978	472614	0	0
	3	107	1	4	5	10	2	5	10	1	28	0	5	0	6	0	15	90	8.27091e+06	129520	477387	0	0
	2	147	4	1	6	0	6	4	2	5	17	0	3	2	8	0	19	20	9.79671e+06	979378	521891	0	0
	4	66	0	5	5	3	0	5	5	1	9	2	5	1	8	0	19	171	8.79864e+06	244438	470471	0	0
	1	29	4	1	4	2	5	5	6	1	14	0	4	0	5	0	15	39	8.7213e+06	157266	513257	0	0
	3	60	4	1	6	4	3	3	6	3	29	0	8	0	3	1	4	140	9.14453e+06	547838	506446	0	0
	2	17	0	5	1	6	2	9	2	1	26	0	2	2	2	0	19	147	9.25096e+06	233158	509493	0	0
	2	176	1	4	3	13	1	4	0	3	12	0	10	0	8	0	8	99	8.63127e+06	301726	469809	0	0
	3	66	0	4	6	9	1	6	8	1	3	0	1	2	3	0	3	56	8.616e+06	85210.6	489183	0	0
	3	138	0	4	3	18	6	4	7	2	10	0	8	0	2	0	11	21	8.89875e+06	152602	479419	0	0
	0	170	2	2	1	1	4	4	10	3	15	0	3	2	6	0	19	49	9.57775e+06	897844	519995	0	0
	1	117	1	3	5	1	5	3	14	0	14	1	5	1	2	1	4	188	9.15476e+06	824959	533473	0	0
	4	26	0	4	1	19	6	5	0	0	20	0	12	0	4	0	6	27	8.68035e+06	179386	510884	0	0
	3	163	0	4	3	21	0	7	9	0	25	0	12	0	3	0	14	1	7.96487e+06	130306	478297	0	0
	0	210	2	2	6	14	0	8	6	1	16	0	14	0	6	0	6	43	8.57609e+06	137809	478982	0	0
	4	66	0	5	5	3	0	5	5	1	8	1	4	1	8	0	19	171	8.44433e+06	244438	470338	0	0
	2	1	2	2	6	2	8	3	7	0	13	1	0	6	6	0	12	148	9.37582e+06	661723	539238	0	0
	2	141	0	4	3	7	1	4	10	3	22	0	4	2	1	0	6	110	9.2903e+06	525485	484480	0	0
	4	35	0	4	4	5	1	4	11	0	16	1	1	4	5	0	1	112	8.89757e+06	514388	519366	0	0
	2	175	1	4	4	18	1	6	0	3	12	0	10	0	8	0	8	99	9.08325e+06	162894	464322	0	0
	3	54	2	2	0	25	0	4	3	4	27	0	5	0	3	1	16	181	9.4171e+06	230385	470635	0	0
	1	202	2	2	5	4	0	8	6	1	16	0	14	0	6	0	5	0	8.22421e+06	175547	486282	0	0
	1	117	0	4	5	1	5	3	14	0	15	1	5	1	1	0	4	188	9.04308e+06	824959	530903	0	0
	2	118	1	4	4	3	9	2	3	4	0	1	8	1	8	0	0	33	9.67875e+06	691180	518107	0	0
	3	86	0	5	3	5	1	4	11	1	15	1	0	8	6	0	1	97	8.77704e+06	117585	480723	0	0
	1	41	4	1	6	6	8	2	8	3	13	0	0	3	8	0	17	166	9.43606e+06	413844	500279	0	0
	3	60	4	1	6	4	3	3	6	3	29	0	8	0	3	1	4	140	9.14453e+06	547838	506446	0	0
	4	64	1	3	5	7	7	3	8	2	16	0	16	0	0	1	18	47	8.75891e+06	105071	499113	0	0
	0	166	0	4	3	16	8	3	1	1	17	0	16	0	1	1	5	25	8.30116e+06	124019	477505	0	0
	3	138	0	5	3	18	6	4	7	2	10	0	8	0	2	0	12	22	8.91039e+06	153021	479429	0	0
	0	61	0	4	3	16	8	3	1	1	17	0	16	0	1	1	7	28	8.51871e+06	64933.3	491990	0	0
	1	148	4	1	4	16	4	3	10	2	5	0	13	0	7	0	4	48	8.71272e+06	157887	474194	0	0
	3	43	0	5	4	5	1	4	10	0	16	1	0	8	5	0	1	112	9.02941e+06	508743	522162	0	0
	1	74	2	2	1	22	8	3	10	2	29	0	11	0	5	0	6	197	9.16562e+06	203223	473590	0	0
	2	176	0	5	3	13	1	4	0	3	12	0	10	0	8	0	8	99	8.64328e+06	301726	470094	0	0
	4	19	1	4	3	20	2	4	4	1	16	0	1	2	0	0	10	118	8.55106e+06	65984.4	483559	0	0
--------------------------------------------------
#Generation	No.	-->2
#Variable_vector	Fitness_vector	Constraint_violation	Overall_penalty
	4	4	1	4	5	7	6	3	3	3	0	0	7	0	3	1	17	35	9.40476e+06	323774	516924	0	0
	3	160	0	4	3	21	0	7	8	0	25	0	12	0	3	0	15	37	7.98708e+06	141472	472858	0	0
	0	76	4	1	5	2	4	6	1	5	12	0	5	0	0	1	7	62	1.01667e+07	742871	525421	0	0
	1	13	1	3	5	0	4	7	3	1	12	0	17	0	4	0	3	198	9.46007e+06	407042	525950	0	0
	2	118	1	4	4	3	9	2	3	4	1	1	8	1	8	0	0	38	9.67882e+06	692478	517499	0	0
	1	41	4	1	6	6	8	2	8	3	13	0	0	3	8	0	18	167	9.4364e+06	414297	500067	0	0
	4	93	2	2	2	13	2	3	5	2	24	0	5	1	8	0	16	144	8.38239e+06	159217	473440	0	0
	2	141	0	4	3	7	1	4	10	3	21	0	4	2	1	0	6	110	9.2903e+06	525485	484480	0	0
	3	43	0	5	4	5	1	4	10	0	16	1	0	8	5	0	1	112	9.02941e+06	508743	522162	0	0
	1	202	2	2	6	14	0	8	6	1	16	0	14	0	6	0	5	0	8.47872e+06	130429	483100	0	0
	3	107	1	4	5	10	2	5	10	1	28	0	5	0	6	0	15	90	8.27091e+06	129520	477387	0	0
	2	147	4	1	6	0	6	4	2	5	17	0	3	2	8	0	19	20	9.79671e+06	979378	521891	0	0
	4	66	0	5	5	3	0	5	5	1	9	2	5	1	8	0	19	171	8.79864e+06	244438	470471	0	0
	3	60	4	1	6	4	3	3	6	3	29	0	8	0	3	1	4	140	9.14453e+06	547838	506446	0	0
	2	176	1	4	3	13	1	4	0	3	12	0	10	0	8	0	8	99	8.63127e+06	301726	469809	0	0
	0	170	2	2	1	1	4	4	10	3	15	0	3	2	6	0	19	49	9.57775e+06	897844	519995	0	0
	1	117	1	3	5	1	5	3	14	0	14	1	5	1	2	1	4	188	9.15476e+06	824959	533473	0	0
	4	26	0	4	1	19	6	5	0	0	20	0	12	0	4	0	6	27	8.68035e+06	179386	510884	0	0
	3	163	0	4	3	21	0	7	9	0	25	0	12	0	3	0	14	1	7.96487e+06	130306	478297	0	0
	0	210	2	2	6	14	0	8	6	1	16	0	14	0	6	0	6	43	8.57609e+06	137809	478982	0	0
	4	66	0	5	5	3	0	5	5	1	8	1	4	1	8	0	19	171	8.44433e+06	244438	470338	0	0
	2	141	0	4	3	7	1	4	10	3	22	0	4	2	1	0	6	110	9.2903e+06	525485	484480	0	0
	4	35	0	4	4	5	1	4	11	0	16	1	1	4	5	0	1	112	8.89757e+06	514388	519366	0	0
	2	175	1	4	4	18	1	6	0	3	12	0	10	0	8	0	8	99	9.08325e+06	162894	464322	0	0
	1	202	2	2	5	4	0	8	6	1	16	0	14	0	6	0	5	0	8.22421e+06	175547	486282	0	0
	1	117	0	4	5	1	5	3	14	0	15	1	5	1	1	0	4	188	9.04308e+06	824959	530903	0	0
	2	118	1	4	4	3	9	2	3	4	0	1	8	1	8	0	0	33	9.67875e+06	691180	518107	0	0
	1	41	4	1	6	6	8	2	8	3	13	0	0	3	8	0	17	166	9.43606e+06	413844	500279	0	0
	3	60	4	1	6	4	3	3	6	3	29	0	8	0	3	1	4	140	9.14453e+06	547838	506446	0	0
	0	166	0	4	3	16	8	3	1	1	17	0	16	0	1	1	5	25	8.30116e+06	124019	477505	0	0
	1	148	4	1	4	16	4	3	10	2	5	0	13	0	7	0	4	48	8.71272e+06	157887	474194	0	0
	3	43	0	5	4	5	1	4	10	0	16	1	0	8	5	0	1	112	9.02941e+06	508743	522162	0	0
	2	176	0	5	3	13	1	4	0	3	12	0	10	0	8	0	8	99	8.64328e+06	301726	470094	0	0
	4	94	2	2	2	13	2	3	5	2	24	0	5	1	8	0	16	144	8.38117e+06	159815	473301	0	0
	0	169	2	2	0	1	4	4	10	3	15	0	3	2	6	0	19	49	9.58268e+06	908478	520790	0	0
	2	118	1	4	4	3	9	2	3	4	0	1	8	1	8	0	0	33	9.67875e+06	691180	518107	0	0
	2	141	0	4	3	7	1	4	10	3	22	0	4	2	1	0	6	110	9.2903e+06	525485	484480	0	0
	2	116	4	1	6	6	8	2	8	3	14	0	0	9	8	0	17	156	9.2849e+06	469836	487171	0	0
	3	61	4	1	6	4	3	4	6	3	29	0	8	0	3	1	4	140	9.28141e+06	578735	503108	0	0
	3	107	1	4	5	10	2	5	10	1	28	0	5	1	6	0	16	176	8.40061e+06	158509	463794	0	0
	2	117	1	4	4	3	9	2	3	4	0	1	8	1	8	0	1	159	9.74595e+06	724273	502485	0	0
	4	66	0	5	5	3	0	5	5	1	9	1	3	1	8	0	19	145	8.40938e+06	235472	474527	0	0
	3	43	0	5	4	5	1	4	11	0	16	1	0	8	5	0	1	108	9.02734e+06	507682	522659	0	0
	2	175	1	4	4	18	1	6	0	3	12	0	10	0	8	0	9	103	9.08572e+06	163990	463807	0	0
	0	166	0	5	3	16	8	3	1	1	17	0	16	0	1	1	6	26	8.31224e+06	124456	477490	0	0
	2	175	1	4	4	18	0	7	0	3	12	0	11	0	8	0	8	99	8.96401e+06	162894	464649	0	0
	2	118	0	5	4	3	8	2	2	2	1	1	8	1	8	0	0	33	8.4322e+06	130418	487681	0	0
	4	66	0	5	5	3	0	5	5	1	9	2	5	1	8	0	19	171	8.79864e+06	244438	470471	0	0
	1	117	1	3	5	1	5	3	14	0	14	1	5	1	2	1	4	188	9.15476e+06	824959	533473	0	0
	4	86	2	2	1	15	2	3	4	2	24	0	5	1	8	0	16	144	8.36625e+06	154947	472335	0	0
--------------------------------------------------
#Generation	No.	-->3
#Variable_vector	Fitness_vector	Constraint_violation	Overall_penalty
	3	160	0	4	3	21	0	7	8	0	25	0	12	0	3	0	15	37	7.98708e+06	141472	472858	0	0
	0	76	4	1	5	2	4	6	1	5	12	0	5	0	0	1	7	62	1.01667e+07	742871	525421	0	0
	2	118	1	4	4	3	9	2	3	4	1	1	8	1	8	0	0	38	9.67882e+06	692478	517499	0	0
	2	141	0	4	3	7	1	4	10	3	21	0	4	2	1	0	6	110	9.2903e+06	525485	484480	0	0
	3	107	1	4	5	10	2	5	10	1	28	0	5	0	6	0	15	90	8.27091e+06	129520	477387	0	0
	2	147	4	1	6	0	6	4	2	5	17	0	3	2	8	0	19	20	9.79671e+06	979378	521891	0	0
	3	60	4	1	6	4	3	3	6	3	29	0	8	0	3	1	4	140	9.14453e+06	547838	506446	0	0
	2	176	1	4	3	13	1	4	0	3	12	0	10	0	8	0	8	99	8.63127e+06	301726	469809	0	0
	0	170	2	2	1	1	4	4	10	3	15	0	3	2	6	0	19	49	9.57775e+06	897844	519995	0	0
	3	163	0	4	3	21	0	7	9	0	25	0	12	0	3	0	14	1	7.96487e+06	130306	478297	0	0
	4	66	0	5	5	3	0	5	5	1	8	1	4	1	8	0	19	171	8.44433e+06	244438	470338	0	0
	2	141	0	4	3	7	1	4	10	3	22	0	4	2	1	0	6	110	9.2903e+06	525485	484480	0	0
	4	35	0	4	4	5	1	4	11	0	16	1	1	4	5	0	1	112	8.89757e+06	514388	519366	0	0
	2	175	1	4	4	18	1	6	0	3	12	0	10	0	8	0	8	99	9.08325e+06	162894	464322	0	0
	1	202	2	2	5	4	0	8	6	1	16	0	14	0	6	0	5	0	8.22421e+06	175547	486282	0	0
	1	117	0	4	5	1	5	3	14	0	15	1	5	1	1	0	4	188	9.04308e+06	824959	530903	0	0
	2	118	1	4	4	3	9	2	3	4	0	1	8	1	8	0	0	33	9.67875e+06	691180	518107	0	0
	3	60	4	1	6	4	3	3	6	3	29	0	8	0	3	1	4	140	9.14453e+06	547838	506446	0	0
	2	176	0	5	3	13	1	4	0	3	12	0	10	0	8	0	8	99	8.64328e+06	301726	470094	0	0
	4	94	2	2	2	13	2	3	5	2	24	0	5	1	8	0	16	144	8.38117e+06	159815	473301	0	0
	0	169	2	2	0	1	4	4	10	3	15	0	3	2	6	0	19	49	9.58268e+06	908478	520790	0	0
	2	141	0	4	3	7	1	4	10	3	22	0	4	2	1	0	6	110	9.2903e+06	525485	484480	0	0
	2	116	4	1	6	6	8	2	8	3	14	0	0	9	8	0	17	156	9.2849e+06	469836	487171	0	0
	3	61	4	1	6	4	3	4	6	3	29	0	8	0	3	1	4	140	9.28141e+06	578735	503108	0	0
	3	107	1	4	5	10	2	5	10	1	28	0	5	1	6	0	16	176	8.40061e+06	158509	463794	0	0
	2	117	1	4	4	3	9	2	3	4	0	1	8	1	8	0	1	159	9.74595e+06	724273	502485	0	0
	2	175	1	4	4	18	1	6	0	3	12	0	10	0	8	0	9	103	9.08572e+06	163990	463807	0	0
	2	175	1	4	4	18	0	7	0	3	12	0	11	0	8	0	8	99	8.96401e+06	162894	464649	0	0
	1	117	1	3	5	1	5	3	14	0	14	1	5	1	2	1	4	188	9.15476e+06	824959	533473	0	0
	4	86	2	2	1	15	2	3	4	2	24	0	5	1	8	0	16	144	8.36625e+06	154947	472335	0	0
	2	115	0	4	6	1	5	3	14	0	15	1	5	1	1	0	4	188	9.02575e+06	818862	530483	0	0
	2	118	1	4	5	4	9	2	3	4	0	0	8	1	8	0	0	33	9.38766e+06	601490	510487	0	0
	1	200	2	2	6	4	0	8	6	1	16	0	16	0	6	0	5	0	8.23946e+06	169697	487395	0	0
	1	202	2	2	5	4	0	8	6	1	16	0	14	0	6	0	5	0	8.22421e+06	175547	486282	0	0
	2	176	0	5	3	13	1	4	0	3	12	0	11	0	8	0	8	99	8.64328e+06	301726	470094	0	0
	3	161	1	4	4	3	9	2	3	4	0	1	7	1	8	0	0	31	9.65088e+06	708042	514146	0	0
	2	175	1	4	4	18	0	7	0	0	12	0	11	0	8	0	7	56	8.02521e+06	150144	470628	0	0
	1	141	0	4	2	8	1	4	9	3	23	0	4	2	1	0	6	110	9.26986e+06	530615	489833	0	0
	4	71	0	5	5	3	0	5	5	1	9	1	3	1	8	0	19	145	8.38841e+06	240240	473324	0	0
	2	134	0	4	3	7	1	4	10	3	22	0	4	2	1	0	6	110	9.29641e+06	522689	485169	0	0
	4	116	0	5	4	5	1	4	11	0	15	1	1	4	5	0	1	112	8.5576e+06	583535	498237	0	0
	2	118	1	4	4	3	9	2	3	4	1	1	8	1	8	0	0	38	9.67882e+06	692478	517499	0	0
	1	103	1	4	4	3	9	2	3	4	0	0	8	1	8	0	0	33	9.46685e+06	682470	520247	0	0
	4	78	0	5	5	3	0	5	5	1	10	1	3	1	8	0	19	145	8.36969e+06	245890	471913	0	0
	2	118	1	4	4	3	9	2	3	4	0	1	8	1	8	0	0	33	9.67875e+06	691180	518107	0	0
	2	118	1	4	4	3	9	2	3	4	0	1	8	1	8	0	0	33	9.67875e+06	691180	518107	0	0
	4	94	2	2	2	13	2	3	5	2	24	0	5	1	8	0	16	144	8.38117e+06	159815	473301	0	0
	2	118	1	4	5	3	9	2	3	4	0	1	8	1	8	0	0	33	9.66827e+06	667611	516971	0	0
	3	163	0	4	3	21	0	7	9	0	26	0	12	0	3	0	13	1	7.96487e+06	130305	478297	0	0
	2	116	4	1	6	6	8	2	8	3	14	0	0	9	8	0	17	156	9.2849e+06	469836	487171	0	0
--------------------------------------------------
#Generation	No.	-->4
#Variable_vector	Fitness_vector	Constraint_violation	Overall_penalty
	3	160	0	4	3	21	0	7	8	0	25	0	12	0	3	0	15	37	7.98708e+06	141472	472858	0	0
	2	141	0	4	3	7	1	4	10	3	21	0	4	2	1	0	6	110	9.2903e+06	525485	484480	0	0
	2	147	4	1	6	0	6	4	2	5	17	0	3	2	8	0	19	20	9.79671e+06	979378	521891	0	0
	2	176	1	4	3	13	1	4	0	3	12	0	10	0	8	0	8	99	8.63127e+06	301726	469809	0	0
	0	170	2	2	1	1	4	4	10	3	15	0	3	2	6	0	19	49	9.57775e+06	897844	519995	0	0
	3	163	0	4	3	21	0	7	9	0	25	0	12	0	3	0	14	1	7.96487e+06	130306	478297	0	0
	4	66	0	5	5	3	0	5	5	1	8	1	4	1	8	0	19	171	8.44433e+06	244438	470338	0	0
	2	141	0	4	3	7	1	4	10	3	22	0	4	2	1	0	6	110	9.2903e+06	525485	484480	0	0
	4	35	0	4	4	5	1	4	11	0	16	1	1	4	5	0	1	112	8.89757e+06	514388	519366	0	0
	2	175	1	4	4	18	1	6	0	3	12	0	10	0	8	0	8	99	9.08325e+06	162894	464322	0	0
	1	202	2	2	5	4	0	8	6	1	16	0	14	0	6	0	5	0	8.22421e+06	175547	486282	0	0
	1	117	0	4	5	1	5	3	14	0	15	1	5	1	1	0	4	188	9.04308e+06	824959	530903	0	0
	0	169	2	2	0	1	4	4	10	3	15	0	3	2	6	0	19	49	9.58268e+06	908478	520790	0	0
	2	141	0	4	3	7	1	4	10	3	22	0	4	2	1	0	6	110	9.2903e+06	525485	484480	0	0
	3	61	4	1	6	4	3	4	6	3	29	0	8	0	3	1	4	140	9.28141e+06	578735	503108	0	0
	3	107	1	4	5	10	2	5	10	1	28	0	5	1	6	0	16	176	8.40061e+06	158509	463794	0	0
	2	117	1	4	4	3	9	2	3	4	0	1	8	1	8	0	1	159	9.74595e+06	724273	502485	0	0
	2	175	1	4	4	18	1	6	0	3	12	0	10	0	8	0	9	103	9.08572e+06	163990	463807	0	0
	2	175	1	4	4	18	0	7	0	3	12	0	11	0	8	0	8	99	8.96401e+06	162894	464649	0	0
	1	117	1	3	5	1	5	3	14	0	14	1	5	1	2	1	4	188	9.15476e+06	824959	533473	0	0
	2	115	0	4	6	1	5	3	14	0	15	1	5	1	1	0	4	188	9.02575e+06	818862	530483	0	0
	2	118	1	4	5	4	9	2	3	4	0	0	8	1	8	0	0	33	9.38766e+06	601490	510487	0	0
	1	202	2	2	5	4	0	8	6	1	16	0	14	0	6	0	5	0	8.22421e+06	175547	486282	0	0
	2	176	0	5	3	13	1	4	0	3	12	0	11	0	8	0	8	99	8.64328e+06	301726	470094	0	0
	3	161	1	4	4	3	9	2	3	4	0	1	7	1	8	0	0	31	9.65088e+06	708042	514146	0	0
	2	175	1	4	4	18	0	7	0	0	12	0	11	0	8	0	7	56	8.02521e+06	150144	470628	0	0
	4	71	0	5	5	3	0	5	5	1	9	1	3	1	8	0	19	145	8.38841e+06	240240	473324	0	0
	2	134	0	4	3	7	1	4	10	3	22	0	4	2	1	0	6	110	9.29641e+06	522689	485169	0	0
	4	116	0	5	4	5	1	4	11	0	15	1	1	4	5	0	1	112	8.5576e+06	583535	498237	0	0
	1	103	1	4	4	3	9	2	3	4	0	0	8	1	8	0	0	33	9.46685e+06	682470	520247	0	0
	4	78	0	5	5	3	0	5	5	1	10	1	3	1	8	0	19	145	8.36969e+06	245890	471913	0	0
	3	163	0	4	3	21	0	7	9	0	26	0	12	0	3	0	13	1	7.96487e+06	130305	478297	0	0
	3	107	1	4	5	10	3	4	10	1	28	0	5	1	6	0	16	176	8.4713e+06	158509	463785	0	0
	2	161	1	4	4	3	9	2	3	4	0	1	7	1	8	0	0	31	9.6654e+06	707085	514442	0	0
	4	72	0	5	5	3	0	5	5	1	8	1	4	1	8	0	18	88	8.36e+06	220887	482582	0	0
	2	115	0	4	6	1	5	3	14	0	15	1	5	1	2	1	4	188	9.08874e+06	818862	530473	0	0
	4	94	2	2	2	13	2	3	4	2	24	0	5	1	8	0	16	144	8.34583e+06	159881	470725	0	0
	2	175	1	4	4	18	1	6	1	3	12	0	10	0	8	0	8	103	9.11853e+06	164048	463781	0	0
	2	141	0	4	3	7	1	4	10	3	22	0	4	2	1	0	6	110	9.2903e+06	525485	484480	0	0
	3	126	4	1	6	6	8	2	8	3	14	0	0	9	8	0	17	155	9.25471e+06	475430	485818	0	0
	2	118	1	4	5	4	9	2	4	4	0	0	9	1	8	0	0	178	9.55551e+06	639117	493100	0	0
	3	147	4	1	6	0	6	4	2	5	17	0	3	2	8	0	19	20	9.78149e+06	980421	521569	0	0
	2	161	1	4	3	3	9	2	3	4	0	1	7	1	8	0	0	31	9.68246e+06	731681	517484	0	0
	2	141	0	4	3	7	1	4	10	3	21	0	4	2	1	0	6	110	9.2903e+06	525485	484480	0	0
	2	142	1	3	4	18	0	7	1	0	12	0	12	0	8	0	7	56	8.00392e+06	140262	472607	0	0
	2	175	1	4	4	18	1	6	0	3	12	0	11	0	8	0	8	97	9.08213e+06	162317	464592	0	0
	4	66	0	5	5	3	0	5	5	1	8	1	4	1	8	0	19	171	8.44433e+06	244438	470338	0	0
	4	66	0	5	5	3	0	5	5	1	8	1	4	1	8	0	19	171	8.44433e+06	244438	470338	0	0
	2	142	1	4	4	18	0	7	1	3	12	0	12	0	8	0	8	99	8.98865e+06	153013	466867	0	0
	2	174	0	4	3	7	2	4	9	3	21	0	4	2	1	0	6	110	9.17493e+06	539050	486652	0	0
--------------------------------------------------
#Generation	No.	-->5
#Variable_vector	Fitness_vector	Constraint_violation	Overall_penalty
	3	160	0	4	3	21	0	7	8	0	25	0	12	0	3	0	15	37	7.98708e+06	141472	472858	0	0
	2	147	4	1	6	0	6	4	2	5	17	0	3	2	8	0	19	20	9.79671e+06	979378	521891	0	0
	2	176	1	4	3	13	1	4	0	3	12	0	10	0	8	0	8	99	8.63127e+06	301726	469809	0	0
	0	170	2	2	1	1	4	4	10	3	15	0	3	2	6	0	19	49	9.57775e+06	897844	519995	0	0
	3	163	0	4	3	21	0	7	9	0	25	0	12	0	3	0	14	1	7.96487e+06	130306	478297	0	0
	4	66	0	5	5	3	0	5	5	1	8	1	4	1	8	0	19	171	8.44433e+06	244438	470338	0	0
	2	175	1	4	4	18	1	6	0	3	12	0	10	0	8	0	8	99	9.08325e+06	162894	464322	0	0
	1	202	2	2	5	4	0	8	6	1	16	0	14	0	6	0	5	0	8.22421e+06	175547	486282	0	0
	0	169	2	2	0	1	4	4	10	3	15	0	3	2	6	0	19	49	9.58268e+06	908478	520790	0	0
	3	107	1	4	5	10	2	5	10	1	28	0	5	1	6	0	16	176	8.40061e+06	158509	463794	0	0
	2	117	1	4	4	3	9	2	3	4	0	1	8	1	8	0	1	159	9.74595e+06	724273	502485	0	0
	2	175	1	4	4	18	1	6	0	3	12	0	10	0	8	0	9	103	9.08572e+06	163990	463807	0	0
	2	175	1	4	4	18	0	7	0	3	12	0	11	0	8	0	8	99	8.96401e+06	162894	464649	0	0
	1	202	2	2	5	4	0	8	6	1	16	0	14	0	6	0	5	0	8.22421e+06	175547	486282	0	0
	2	176	0	5	3	13	1	4	0	3	12	0	11	0	8	0	8	99	8.64328e+06	301726	470094	0	0
	4	116	0	5	4	5	1	4	11	0	15	1	1	4	5	0	1	112	8.5576e+06	583535	498237	0	0
	4	78	0	5	5	3	0	5	5	1	10	1	3	1	8	0	19	145	8.36969e+06	245890	471913	0	0
	3	163	0	4	3	21	0	7	9	0	26	0	12	0	3	0	13	1	7.96487e+06	130305	478297	0	0
	3	107	1	4	5	10	3	4	10	1	28	0	5	1	6	0	16	176	8.4713e+06	158509	463785	0	0
	2	115	0	4	6	1	5	3	14	0	15	1	5	1	2	1	4	188	9.08874e+06	818862	530473	0	0
	2	175	1	4	4	18	1	6	1	3	12	0	10	0	8	0	8	103	9.11853e+06	164048	463781	0	0
	3	126	4	1	6	6	8	2	8	3	14	0	0	9	8	0	17	155	9.25471e+06	475430	485818	0	0
	2	118	1	4	5	4	9	2	4	4	0	0	9	1	8	0	0	178	9.55551e+06	639117	493100	0	0
	3	147	4	1	6	0	6	4	2	5	17	0	3	2	8	0	19	20	9.78149e+06	980421	521569	0	0
	2	142	1	3	4	18	0	7	1	0	12	0	12	0	8	0	7	56	8.00392e+06	140262	472607	0	0
	2	175	1	4	4	18	1	6	0	3	12	0	11	0	8	0	8	97	9.08213e+06	162317	464592	0	0
	4	66	0	5	5	3	0	5	5	1	8	1	4	1	8	0	19	171	8.44433e+06	244438	470338	0	0
	4	66	0	5	5	3	0	5	5	1	8	1	4	1	8	0	19	171	8.44433e+06	244438	470338	0	0
	2	142	1	4	4	18	0	7	1	3	12	0	12	0	8	0	8	99	8.98865e+06	153013	466867	0	0
	2	174	0	4	3	7	2	4	9	3	21	0	4	2	1	0	6	110	9.17493e+06	539050	486652	0	0
	1	144	0	4	3	7	2	4	9	3	22	0	4	2	1	0	7	158	9.19885e+06	543167	482447	0	0
	4	72	0	5	5	3	0	5	5	1	8	1	3	1	8	0	19	96	8.34405e+06	224100	481076	0	0
	2	118	1	4	6	5	9	2	4	4	0	0	9	1	8	0	0	183	9.58094e+06	556900	491679	0	0
	3	107	1	4	4	9	4	4	10	1	28	0	5	1	6	0	15	172	8.47424e+06	157964	462434	0	0
	3	107	1	4	5	10	3	4	10	1	28	0	5	1	6	0	16	176	8.4713e+06	158509	463785	0	0
	3	158	1	4	4	5	1	4	11	0	15	1	1	5	5	0	0	113	8.55932e+06	581921	498435	0	0
	2	175	1	4	4	18	0	7	0	3	12	0	11	0	8	0	8	99	8.96401e+06	162894	464649	0	0
	2	142	1	3	4	18	0	7	1	0	12	0	12	0	8	0	7	56	8.00392e+06	140262	472607	0	0
	2	115	0	4	6	1	5	4	14	0	14	1	4	1	1	0	4	188	8.73399e+06	889893	510806	0	0
	4	112	0	5	3	5	1	4	11	0	15	1	1	4	5	0	0	108	8.63524e+06	607657	505241	0	0
	4	66	0	5	5	3	0	5	5	1	8	1	4	1	8	0	19	171	8.44433e+06	244438	470338	0	0
	4	66	0	5	5	3	0	5	5	1	8	1	4	1	8	0	19	171	8.44433e+06	244438	470338	0	0
	4	116	0	5	4	5	1	4	11	0	15	1	1	4	5	0	1	112	8.5576e+06	583535	498237	0	0
	2	175	1	4	4	18	0	7	0	3	12	0	11	0	8	0	8	99	8.96401e+06	162894	464649	0	0
	4	94	2	2	2	13	2	3	4	2	24	0	4	1	8	0	16	144	8.33732e+06	159881	470725	0	0
	3	129	0	4	4	5	1	4	11	0	15	1	1	4	5	0	1	117	8.54875e+06	573411	500085	0	0
	2	175	1	3	4	18	0	7	0	0	12	0	12	0	8	0	7	56	8.01372e+06	150144	470447	0	0
	1	117	1	4	5	1	5	3	14	0	15	1	4	1	1	0	4	188	9.03264e+06	824959	530827	0	0
	2	140	1	4	4	3	9	2	3	4	0	1	9	1	8	0	0	162	9.74588e+06	734335	500042	0	0
	1	103	1	4	5	5	8	3	3	4	0	0	8	1	8	0	0	115	9.46043e+06	549042	496631	0	0
--------------------------------------------------
#Generation	No.	-->6
#Variable_vector	Fitness_vector	Constraint_violation	Overall_penalty
	3	160	0	4	3	21	0	7	8	0	25	0	12	0	3	0	15	37	7.98708e+06	141472	472858	0	0
	2	147	4	1	6	0	6	4	2	5	17	0	3	2	8	0	19	20	9.79671e+06	979378	521891	0	0
	2	176	1	4	3	13	1	4	0	3	12	0	10	0	8	0	8	99	8.63127e+06	301726	469809	0	0
	0	170	2	2	1	1	4	4	10	3	15	0	3	2	6	0	19	49	9.57775e+06	897844	519995	0	0
	3	163	0	4	3	21	0	7	9	0	25	0	12	0	3	0	14	1	7.96487e+06	130306	478297	0	0
	1	202	2	2	5	4	0	8	6	1	16	0	14	0	6	0	5	0	8.22421e+06	175547	486282	0	0
	0	169	2	2	0	1	4	4	10	3	15	0	3	2	6	0	19	49	9.58268e+06	908478	520790	0	0
	3	107	1	4	5	10	2	5	10	1	28	0	5	1	6	0	16	176	8.40061e+06	158509	463794	0	0
	2	117	1	4	4	3	9	2	3	4	0	1	8	1	8	0	1	159	9.74595e+06	724273	502485	0	0
	2	175	1	4	4	18	1	6	0	3	12	0	10	0	8	0	9	103	9.08572e+06	163990	463807	0	0
	2	175	1	4	4	18	0	7	0	3	12	0	11	0	8	0	8	99	8.96401e+06	162894	464649	0	0
	1	202	2	2	5	4	0	8	6	1	16	0	14	0	6	0	5	0	8.22421e+06	175547	486282	0	0
	4	116	0	5	4	5	1	4	11	0	15	1	1	4	5	0	1	112	8.5576e+06	583535	498237	0	0
	4	78	0	5	5	3	0	5	5	1	10	1	3	1	8	0	19	145	8.36969e+06	245890	471913	0	0
	3	163	0	4	3	21	0	7	9	0	26	0	12	0	3	0	13	1	7.96487e+06	130305	478297	0	0
	2	175	1	4	4	18	1	6	1	3	12	0	10	0	8	0	8	103	9.11853e+06	164048	463781	0	0
	3	126	4	1	6	6	8	2	8	3	14	0	0	9	8	0	17	155	9.25471e+06	475430	485818	0	0
	2	118	1	4	5	4	9	2	4	4	0	0	9	1	8	0	0	178	9.55551e+06	639117	493100	0	0
	3	147	4	1	6	0	6	4	2	5	17	0	3	2	8	0	19	20	9.78149e+06	980421	521569	0	0
	2	142	1	3	4	18	0	7	1	0	12	0	12	0	8	0	7	56	8.00392e+06	140262	472607	0	0
	2	174	0	4	3	7	2	4	9	3	21	0	4	2	1	0	6	110	9.17493e+06	539050	486652	0	0
	1	144	0	4	3	7	2	4	9	3	22	0	4	2	1	0	7	158	9.19885e+06	543167	482447	0	0
	4	72	0	5	5	3	0	5	5	1	8	1	3	1	8	0	19	96	8.34405e+06	224100	481076	0	0
	2	118	1	4	6	5	9	2	4	4	0	0	9	1	8	0	0	183	9.58094e+06	556900	491679	0	0
	3	107	1	4	4	9	4	4	10	1	28	0	5	1	6	0	15	172	8.47424e+06	157964	462434	0	0
	2	175	1	4	4	18	0	7	0	3	12	0	11	0	8	0	8	99	8.96401e+06	162894	464649	0	0
	2	142	1	3	4	18	0	7	1	0	12	0	12	0	8	0	7	56	8.00392e+06	140262	472607	0	0
	2	115	0	4	6	1	5	4	14	0	14	1	4	1	1	0	4	188	8.73399e+06	889893	510806	0	0
	4	112	0	5	3	5	1	4	11	0	15	1	1	4	5	0	0	108	8.63524e+06	607657	505241	0	0
	4	116	0	5	4	5	1	4	11	0	15	1	1	4	5	0	1	112	8.5576e+06	583535	498237	0	0
	2	175	1	4	4	18	0	7	0	3	12	0	11	0	8	0	8	99	8.96401e+06	162894	464649	0	0
	4	94	2	2	2	13	2	3	4	2	24	0	4	1	8	0	16	144	8.33732e+06	159881	470725	0	0
	3	129	0	4	4	5	1	4	11	0	15	1	1	4	5	0	1	117	8.54875e+06	573411	500085	0	0
	2	175	1	3	4	18	0	7	0	0	12	0	12	0	8	0	7	56	8.01372e+06	150144	470447	0	0
	1	117	1	4	5	1	5	3	14	0	15	1	4	1	1	0	4	188	9.03264e+06	824959	530827	0	0
	2	140	1	4	4	3	9	2	3	4	0	1	9	1	8	0	0	162	9.74588e+06	734335	500042	0	0
	3	118	0	4	4	4	9	2	4	4	0	0	9	1	8	0	0	178	9.55138e+06	668958	493778	0	0
	4	67	0	5	5	3	0	5	5	1	8	1	4	1	8	0	19	171	8.43896e+06	245522	470062	0	0
	2	118	1	4	5	4	9	2	4	4	0	0	9	1	8	0	0	112	9.52215e+06	621990	501131	0	0
	3	110	1	4	4	11	3	4	10	1	29	0	5	1	6	0	16	176	8.46441e+06	160309	461114	0	0
	3	107	1	4	5	9	3	4	11	1	29	0	5	1	6	0	17	174	8.47564e+06	158580	460995	0	0
	2	175	1	3	4	18	0	7	0	0	12	0	13	0	8	0	7	56	8.01372e+06	150144	470447	0	0
	2	175	1	4	3	13	0	4	0	3	12	0	12	0	8	0	9	97	8.48104e+06	298907	471161	0	0
	2	175	1	4	4	18	0	7	0	3	12	0	11	0	8	0	9	102	8.96592e+06	163703	464271	0	0
	2	140	1	4	4	3	9	2	3	4	0	1	8	1	8	0	0	159	9.71784e+06	733557	500408	0	0
	3	142	4	1	6	2	6	4	2	5	17	0	3	2	8	0	19	20	9.70486e+06	763426	508049	0	0
	3	107	1	4	5	10	2	5	10	1	28	0	5	1	6	0	16	176	8.40061e+06	158509	463794	0	0
	4	67	0	5	5	3	0	5	4	1	8	1	4	1	8	0	19	171	8.4368e+06	269692	470583	0	0
	1	144	0	4	2	6	2	4	9	3	22	0	4	2	1	1	6	158	9.32353e+06	619658	494777	0	0
	0	117	0	4	3	7	1	4	9	3	22	0	4	2	1	0	8	159	9.3622e+06	520593	482303	0	0
--------------------------------------------------
#Generation	No.	-->7
#Variable_vector	Fitness_vector	Constraint_violation	Overall_penalty
	3	160	0	4	3	21	0	7	8	0	25	0	12	0	3	0	15	37	7.98708e+06	141472	472858	0	0
	2	147	4	1	6	0	6	4	2	5	17	0	3	2	8	0	19	20	9.79671e+06	979378	521891	0	0
	2	176	1	4	3	13	1	4	0	3	12	0	10	0	8	0	8	99	8.63127e+06	301726	469809	0	0
	0	170	2	2	1	1	4	4	10	3	15	0	3	2	6	0	19	49	9.57775e+06	897844	519995	0	0
	3	163	0	4	3	21	0	7	9	0	25	0	12	0	3	0	14	1	7.96487e+06	130306	478297	0	0
	1	202	2	2	5	4	0	8	6	1	16	0	14	0	6	0	5	0	8.22421e+06	175547	486282	0	0
	0	169	2	2	0	1	4	4	10	3	15	0	3	2	6	0	19	49	9.58268e+06	908478	520790	0	0
	3	107	1	4	5	10	2	5	10	1	28	0	5	1	6	0	16	176	8.40061e+06	158509	463794	0	0
	2	175	1	4	4	18	1	6	0	3	12	0	10	0	8	0	9	103	9.08572e+06	163990	463807	0	0
	2	175	1	4	4	18	0	7	0	3	12	0	11	0	8	0	8	99	8.96401e+06	162894	464649	0	0
	1	202	2	2	5	4	0	8	6	1	16	0	14	0	6	0	5	0	8.22421e+06	175547	486282	0	0
	4	116	0	5	4	5	1	4	11	0	15	1	1	4	5	0	1	112	8.5576e+06	583535	498237	0	0
	4	78	0	5	5	3	0	5	5	1	10	1	3	1	8	0	19	145	8.36969e+06	245890	471913	0	0
	2	175	1	4	4	18	1	6	1	3	12	0	10	0	8	0	8	103	9.11853e+06	164048	463781	0	0
	3	147	4	1	6	0	6	4	2	5	17	0	3	2	8	0	19	20	9.78149e+06	980421	521569	0	0
	2	142	1	3	4	18	0	7	1	0	12	0	12	0	8	0	7	56	8.00392e+06	140262	472607	0	0
	2	174	0	4	3	7	2	4	9	3	21	0	4	2	1	0	6	110	9.17493e+06	539050	486652	0	0
	1	144	0	4	3	7	2	4	9	3	22	0	4	2	1	0	7	158	9.19885e+06	543167	482447	0	0
	2	118	1	4	6	5	9	2	4	4	0	0	9	1	8	0	0	183	9.58094e+06	556900	491679	0	0
	2	175	1	4	4	18	0	7	0	3	12	0	11	0	8	0	8	99	8.96401e+06	162894	464649	0	0
	2	142	1	3	4	18	0	7	1	0	12	0	12	0	8	0	7	56	8.00392e+06	140262	472607	0	0
	2	115	0	4	6	1	5	4	14	0	14	1	4	1	1	0	4	188	8.73399e+06	889893	510806	0	0
	4	116	0	5	4	5	1	4	11	0	15	1	1	4	5	0	1	112	8.5576e+06	583535	498237	0	0
	2	175	1	4	4	18	0	7	0	3	12	0	11	0	8	0	8	99	8.96401e+06	162894	464649	0	0
	4	94	2	2	2	13	2	3	4	2	24	0	4	1	8	0	16	144	8.33732e+06	159881	470725	0	0
	2	175	1	3	4	18	0	7	0	0	12	0	12	0	8	0	7	56	8.01372e+06	150144	470447	0	0
	2	140	1	4	4	3	9	2	3	4	0	1	9	1	8	0	0	162	9.74588e+06	734335	500042	0	0
	3	118	0	4	4	4	9	2	4	4	0	0	9	1	8	0	0	178	9.55138e+06	668958	493778	0	0
	4	67	0	5	5	3	0	5	5	1	8	1	4	1	8	0	19	171	8.43896e+06	245522	470062	0	0
	3	110	1	4	4	11	3	4	10	1	29	0	5	1	6	0	16	176	8.46441e+06	160309	461114	0	0
	2	175	1	3	4	18	0	7	0	0	12	0	13	0	8	0	7	56	8.01372e+06	150144	470447	0	0
	2	175	1	4	3	13	0	4	0	3	12	0	12	0	8	0	9	97	8.48104e+06	298907	471161	0	0
	2	175	1	4	4	18	0	7	0	3	12	0	11	0	8	0	9	102	8.96592e+06	163703	464271	0	0
	2	140	1	4	4	3	9	2	3	4	0	1	8	1	8	0	0	159	9.71784e+06	733557	500408	0	0
	3	142	4	1	6	2	6	4	2	5	17	0	3	2	8	0	19	20	9.70486e+06	763426	508049	0	0
	3	107	1	4	5	10	2	5	10	1	28	0	5	1	6	0	16	176	8.40061e+06	158509	463794	0	0
	4	67	0	5	5	3	0	5	4	1	8	1	4	1	8	0	19	171	8.4368e+06	269692	470583	0	0
	0	117	0	4	3	7	1	4	9	3	22	0	4	2	1	0	8	159	9.3622e+06	520593	482303	0	0
	3	107	1	4	5	9	3	4	11	1	29	0	4	0	6	0	17	174	8.40394e+06	158580	460995	0	0
	2	175	1	4	4	18	0	7	0	3	12	0	12	0	8	0	8	99	8.96401e+06	162894	464649	0	0
	4	79	0	4	5	3	0	5	6	1	10	1	3	1	8	0	19	130	8.33683e+06	214302	471782	0	0
	1	144	0	4	2	6	2	4	8	3	22	0	4	2	0	0	7	159	9.18135e+06	619864	494026	0	0
	3	122	0	4	5	4	9	2	4	4	0	0	9	1	8	0	0	178	9.53806e+06	642318	492410	0	0
	3	159	0	4	3	20	0	7	9	0	25	0	12	0	3	0	14	1	7.94885e+06	134437	479293	0	0
	3	160	0	4	3	21	0	7	8	0	25	0	12	0	3	0	15	37	7.98708e+06	141472	472858	0	0
	4	105	0	5	3	5	2	5	11	0	15	1	0	10	5	0	0	108	8.53315e+06	640705	498490	0	0
	4	91	0	5	5	3	0	5	5	1	7	1	3	1	8	0	19	129	8.28137e+06	249641	472028	0	0
	2	175	1	4	4	18	1	6	0	3	12	0	11	0	8	0	9	102	9.08516e+06	163703	463943	0	0
	3	160	0	4	3	21	0	7	8	0	25	0	12	0	3	0	15	37	7.98708e+06	141472	472858	0	0
	2	175	1	4	4	18	0	7	0	3	12	0	11	0	8	0	8	99	8.96401e+06	162894	464649	0	0
--------------------------------------------------
#Generation	No.	-->8
#Variable_vector	Fitness_vector	Constraint_violation	Overall_penalty
	2	176	1	4	3	13	1	4	0	3	12	0	10	0	8	0	8	99	8.63127e+06	301726	469809	0	0
	0	170	2	2	1	1	4	4	10	3	15	0	3	2	6	0	19	49	9.57775e+06	897844	519995	0	0
	1	202	2	2	5	4	0	8	6	1	16	0	14	0	6	0	5	0	8.22421e+06	175547	486282	0	0
	0	169	2	2	0	1	4	4	10	3	15	0	3	2	6	0	19	49	9.58268e+06	908478	520790	0	0
	3	107	1	4	5	10	2	5	10	1	28	0	5	1	6	0	16	176	8.40061e+06	158509	463794	0	0
	2	175	1	4	4	18	1	6	0	3	12	0	10	0	8	0	9	103	9.08572e+06	163990	463807	0	0
	1	202	2	2	5	4	0	8	6	1	16	0	14	0	6	0	5	0	8.22421e+06	175547	486282	0	0
	4	116	0	5	4	5	1	4	11	0	15	1	1	4	5	0	1	112	8.5576e+06	583535	498237	0	0
	4	78	0	5	5	3	0	5	5	1	10	1	3	1	8	0	19	145	8.36969e+06	245890	471913	0	0
	2	175	1	4	4	18	1	6	1	3	12	0	10	0	8	0	8	103	9.11853e+06	164048	463781	0	0
	3	147	4	1	6	0	6	4	2	5	17	0	3	2	8	0	19	20	9.78149e+06	980421	521569	0	0
	2	174	0	4	3	7	2	4	9	3	21	0	4	2	1	0	6	110	9.17493e+06	539050	486652	0	0
	1	144	0	4	3	7	2	4	9	3	22	0	4	2	1	0	7	158	9.19885e+06	543167	482447	0	0
	2	115	0	4	6	1	5	4	14	0	14	1	4	1	1	0	4	188	8.73399e+06	889893	510806	0	0
	4	116	0	5	4	5	1	4	11	0	15	1	1	4	5	0	1	112	8.5576e+06	583535	498237	0	0
	2	175	1	4	4	18	0	7	0	3	12	0	11	0	8	0	8	99	8.96401e+06	162894	464649	0	0
	4	94	2	2	2	13	2	3	4	2	24	0	4	1	8	0	16	144	8.33732e+06	159881	470725	0	0
	2	175	1	3	4	18	0	7	0	0	12	0	12	0	8	0	7	56	8.01372e+06	150144	470447	0	0
	2	140	1	4	4	3	9	2	3	4	0	1	9	1	8	0	0	162	9.74588e+06	734335	500042	0	0
	4	67	0	5	5	3	0	5	5	1	8	1	4	1	8	0	19	171	8.43896e+06	245522	470062	0	0
	3	110	1	4	4	11	3	4	10	1	29	0	5	1	6	0	16	176	8.46441e+06	160309	461114	0	0
	2	175	1	3	4	18	0	7	0	0	12	0	13	0	8	0	7	56	8.01372e+06	150144	470447	0	0
	2	175	1	4	3	13	0	4	0	3	12	0	12	0	8	0	9	97	8.48104e+06	298907	471161	0	0
	2	175	1	4	4	18	0	7	0	3	12	0	11	0	8	0	9	102	8.96592e+06	163703	464271	0	0
	2	140	1	4	4	3	9	2	3	4	0	1	8	1	8	0	0	159	9.71784e+06	733557	500408	0	0
	3	142	4	1	6	2	6	4	2	5	17	0	3	2	8	0	19	20	9.70486e+06	763426	508049	0	0
	3	107	1	4	5	10	2	5	10	1	28	0	5	1	6	0	16	176	8.40061e+06	158509	463794	0	0
	4	67	0	5	5	3	0	5	4	1	8	1	4	1	8	0	19	171	8.4368e+06	269692	470583	0	0
	0	117	0	4	3	7	1	4	9	3	22	0	4	2	1	0	8	159	9.3622e+06	520593	482303	0	0
	3	107	1	4	5	9	3	4	11	1	29	0	4	0	6	0	17	174	8.40394e+06	158580	460995	0	0
	2	175	1	4	4	18	0	7	0	3	12	0	12	0	8	0	8	99	8.96401e+06	162894	464649	0	0
	4	79	0	4	5	3	0	5	6	1	10	1	3	1	8	0	19	130	8.33683e+06	214302	471782	0	0
	1	144	0	4	2	6	2	4	8	3	22	0	4	2	0	0	7	159	9.18135e+06	619864	494026	0	0
	3	159	0	4	3	20	0	7	9	0	25	0	12	0	3	0	14	1	7.94885e+06	134437	479293	0	0
	4	105	0	5	3	5	2	5	11	0	15	1	0	10	5	0	0	108	8.53315e+06	640705	498490	0	0
	4	91	0	5	5	3	0	5	5	1	7	1	3	1	8	0	19	129	8.28137e+06	249641	472028	0	0
	2	175	1	4	4	18	1	6	0	3	12	0	11	0	8	0	9	102	9.08516e+06	163703	463943	0	0
	2	175	1	4	4	18	0	7	0	3	12	0	11	0	8	0	8	99	8.96401e+06	162894	464649	0	0
	4	117	1	3	3	20	0	7	9	0	25	0	12	0	3	0	15	42	7.97353e+06	149457	472317	0	0
	2	107	1	4	5	6	2	5	11	1	28	0	5	1	6	0	15	143	8.30945e+06	148294	466479	0	0
	3	119	0	4	4	4	9	2	4	4	0	0	9	1	8	0	0	178	9.54981e+06	669433	493650	0	0
	1	144	1	4	2	6	3	4	8	3	22	0	4	2	0	0	6	158	9.31879e+06	650652	488608	0	0
	1	144	0	4	2	5	2	4	9	3	23	0	4	2	1	0	7	158	9.29248e+06	654048	499207	0	0
	4	78	0	5	5	5	0	5	5	1	11	1	3	1	8	0	19	145	8.39924e+06	191497	468319	0	0
	3	163	0	4	3	21	0	7	9	0	25	0	12	0	3	0	14	1	7.96487e+06	130306	478297	0	0
	3	142	4	1	6	2	6	4	2	5	17	0	3	2	8	0	19	20	9.70486e+06	763426	508049	0	0
	4	94	2	2	2	13	2	3	4	2	24	0	4	1	8	0	16	144	8.33732e+06	159881	470725	0	0
	2	175	1	4	3	13	0	4	0	3	12	0	12	0	8	0	9	97	8.48104e+06	298907	471161	0	0
	2	115	0	4	6	1	5	4	14	0	14	1	4	1	1	0	4	188	8.73399e+06	889893	510806	0	0
	4	67	0	5	5	3	0	5	4	1	8	1	4	1	8	0	19	171	8.4368e+06	269692	470583	0	0
--------------------------------------------------
#Generation	No.	-->9
#Variable_vector	Fitness_vector	Constraint_violation	Overall_penalty
	2	176	1	4	3	13	1	4	0	3	12	0	10	0	8	0	8	99	8.63127e+06	301726	469809	0	0
	0	170	2	2	1	1	4	4	10	3	15	0	3	2	6	0	19	49	9.57775e+06	897844	519995	0	0
	1	202	2	2	5	4	0	8	6	1	16	0	14	0	6	0	5	0	8.22421e+06	175547	486282	0	0
	0	169	2	2	0	1	4	4	10	3	15	0	3	2	6	0	19	49	9.58268e+06	908478	520790	0	0
	1	202	2	2	5	4	0	8	6	1	16	0	14	0	6	0	5	0	8.22421e+06	175547	486282	0	0
	4	116	0	5	4	5	1	4	11	0	15	1	1	4	5	0	1	112	8.5576e+06	583535	498237	0	0
	2	175	1	4	4	18	1	6	1	3	12	0	10	0	8	0	8	103	9.11853e+06	164048	463781	0	0
	3	147	4	1	6	0	6	4	2	5	17	0	3	2	8	0	19	20	9.78149e+06	980421	521569	0	0
	2	174	0	4	3	7	2	4	9	3	21	0	4	2	1	0	6	110	9.17493e+06	539050	486652	0	0
	2	115	0	4	6	1	5	4	14	0	14	1	4	1	1	0	4	188	8.73399e+06	889893	510806	0	0
	4	116	0	5	4	5	1	4	11	0	15	1	1	4	5	0	1	112	8.5576e+06	583535	498237	0	0
	4	67	0	5	5	3	0	5	5	1	8	1	4	1	8	0	19	171	8.43896e+06	245522	470062	0	0
	2	175	1	3	4	18	0	7	0	0	12	0	13	0	8	0	7	56	8.01372e+06	150144	470447	0	0
	2	175	1	4	3	13	0	4	0	3	12	0	12	0	8	0	9	97	8.48104e+06	298907	471161	0	0
	3	142	4	1	6	2	6	4	2	5	17	0	3	2	8	0	19	20	9.70486e+06	763426	508049	0	0
	4	67	0	5	5	3	0	5	4	1	8	1	4	1	8	0	19	171	8.4368e+06	269692	470583	0	0
	0	117	0	4	3	7	1	4	9	3	22	0	4	2	1	0	8	159	9.3622e+06	520593	482303	0	0
	4	79	0	4	5	3	0	5	6	1	10	1	3	1	8	0	19	130	8.33683e+06	214302	471782	0	0
	1	144	0	4	2	6	2	4	8	3	22	0	4	2	0	0	7	159	9.18135e+06	619864	494026	0	0
	3	159	0	4	3	20	0	7	9	0	25	0	12	0	3	0	14	1	7.94885e+06	134437	479293	0	0
	4	105	0	5	3	5	2	5	11	0	15	1	0	10	5	0	0	108	8.53315e+06	640705	498490	0	0
	4	91	0	5	5	3	0	5	5	1	7	1	3	1	8	0	19	129	8.28137e+06	249641	472028	0	0
	2	175	1	4	4	18	1	6	0	3	12	0	11	0	8	0	9	102	9.08516e+06	163703	463943	0	0
	4	117	1	3	3	20	0	7	9	0	25	0	12	0	3	0	15	42	7.97353e+06	149457	472317	0	0
	3	119	0	4	4	4	9	2	4	4	0	0	9	1	8	0	0	178	9.54981e+06	669433	493650	0	0
	1	144	1	4	2	6	3	4	8	3	22	0	4	2	0	0	6	158	9.31879e+06	650652	488608	0	0
	1	144	0	4	2	5	2	4	9	3	23	0	4	2	1	0	7	158	9.29248e+06	654048	499207	0	0
	4	78	0	5	5	5	0	5	5	1	11	1	3	1	8	0	19	145	8.39924e+06	191497	468319	0	0
	3	142	4	1	6	2	6	4	2	5	17	0	3	2	8	0	19	20	9.70486e+06	763426	508049	0	0
	2	175	1	4	3	13	0	4	0	3	12	0	12	0	8	0	9	97	8.48104e+06	298907	471161	0	0
	2	115	0	4	6	1	5	4	14	0	14	1	4	1	1	0	4	188	8.73399e+06	889893	510806	0	0
	4	67	0	5	5	3	0	5	4	1	8	1	4	1	8	0	19	171	8.4368e+06	269692	470583	0	0
	1	144	0	4	2	5	2	4	9	3	22	0	4	2	1	0	7	158	9.29248e+06	654048	499207	0	0
	2	140	1	4	4	3	9	2	3	4	0	0	9	1	8	0	0	162	9.49993e+06	734335	500042	0	0
	1	144	1	4	2	6	3	4	8	3	23	0	4	2	0	0	6	158	9.31879e+06	650652	488608	0	0
	2	175	1	4	4	18	0	7	0	0	12	0	10	0	8	0	9	103	8.05213e+06	163990	464135	0	0
	0	156	2	2	0	1	5	4	10	3	15	0	3	2	6	0	19	49	9.62431e+06	927908	524136	0	0
	2	176	1	4	3	13	2	4	0	3	12	0	10	0	8	0	8	99	8.57152e+06	301923	473328	0	0
	0	117	0	4	3	7	1	4	9	3	22	0	4	2	1	0	8	159	9.3622e+06	520593	482303	0	0
	0	169	2	2	0	1	4	4	10	3	15	0	3	2	7	0	19	49	9.58268e+06	908478	520790	0	0
	3	107	1	4	5	6	3	4	11	1	29	0	4	0	6	0	17	174	8.3192e+06	160873	460792	0	0
	2	175	1	3	4	18	0	7	1	0	12	0	13	0	8	0	8	58	8.01532e+06	151069	470013	0	0
	3	122	0	4	3	5	2	5	11	0	15	1	0	5	5	0	0	108	8.41585e+06	630778	500399	0	0
	4	105	0	5	3	5	2	5	11	0	15	1	0	10	5	0	0	108	8.53315e+06	640705	498490	0	0
	4	67	0	5	5	3	0	5	4	1	8	1	4	1	8	0	19	150	8.41851e+06	262450	473980	0	0
	4	78	0	5	5	5	0	5	5	1	11	1	3	1	8	0	19	166	8.41451e+06	198738	464923	0	0
	0	117	0	4	3	7	1	4	9	3	22	0	4	2	1	0	8	159	9.3622e+06	520593	482303	0	0
	1	144	0	4	3	7	2	4	9	3	22	0	4	2	1	0	6	158	9.19853e+06	543244	482411	0	0
	4	67	0	5	5	3	0	5	5	1	8	1	4	1	8	0	19	171	8.43896e+06	245522	470062	0	0
	1	202	2	2	5	4	0	8	6	1	16	0	14	0	6	0	5	0	8.22421e+06	175547	486282	0	0
--------------------------------------------------
#Generation	No.	-->10
#Variable_vector	Fitness_vector	Constraint_violation	Overall_penalty
	2	176	1	4	3	13	1	4	0	3	12	0	10	0	8	0	8	99	8.63127e+06	301726	469809	0	0
	0	170	2	2	1	1	4	4	10	3	15	0	3	2	6	0	19	49	9.57775e+06	897844	519995	0	0
	1	202	2	2	5	4	0	8	6	1	16	0	14	0	6	0	5	0	8.22421e+06	175547	486282	0	0
	0	169	2	2	0	1	4	4	10	3	15	0	3	2	6	0	19	49	9.58268e+06	908478	520790	0	0
	1	202	2	2	5	4	0	8	6	1	16	0	14	0	6	0	5	0	8.22421e+06	175547	486282	0	0
	4	116	0	5	4	5	1	4	11	0	15	1	1	4	5	0	1	112	8.5576e+06	583535	498237	0	0
	2	175	1	4	4	18	1	6	1	3	12	0	10	0	8	0	8	103	9.11853e+06	164048	463781	0	0
	3	147	4	1	6	0	6	4	2	5	17	0	3	2	8	0	19	20	9.78149e+06	980421	521569	0	0
	2	115	0	4	6	1	5	4	14	0	14	1	4	1	1	0	4	188	8.73399e+06	889893	510806	0	0
	2	175	1	4	3	13	0	4	0	3	12	0	12	0	8	0	9	97	8.48104e+06	298907	471161	0	0
	3	142	4	1	6	2	6	4	2	5	17	0	3	2	8	0	19	20	9.70486e+06	763426	508049	0	0
	4	79	0	4	5	3	0	5	6	1	10	1	3	1	8	0	19	130	8.33683e+06	214302	471782	0	0
	3	159	0	4	3	20	0	7	9	0	25	0	12	0	3	0	14	1	7.94885e+06	134437	479293	0	0
	4	91	0	5	5	3	0	5	5	1	7	1	3	1	8	0	19	129	8.28137e+06	249641	472028	0	0
	2	175	1	4	4	18	1	6	0	3	12	0	11	0	8	0	9	102	9.08516e+06	163703	463943	0	0
	4	117	1	3	3	20	0	7	9	0	25	0	12	0	3	0	15	42	7.97353e+06	149457	472317	0	0
	3	119	0	4	4	4	9	2	4	4	0	0	9	1	8	0	0	178	9.54981e+06	669433	493650	0	0
	1	144	0	4	2	5	2	4	9	3	23	0	4	2	1	0	7	158	9.29248e+06	654048	499207	0	0
	4	78	0	5	5	5	0	5	5	1	11	1	3	1	8	0	19	145	8.39924e+06	191497	468319	0	0
	3	142	4	1	6	2	6	4	2	5	17	0	3	2	8	0	19	20	9.70486e+06	763426	508049	0	0
	2	115	0	4	6	1	5	4	14	0	14	1	4	1	1	0	4	188	8.73399e+06	889893	510806	0	0
	4	67	0	5	5	3	0	5	4	1	8	1	4	1	8	0	19	171	8.4368e+06	269692	470583	0	0
	1	144	0	4	2	5	2	4	9	3	22	0	4	2	1	0	7	158	9.29248e+06	654048	499207	0	0
	2	140	1	4	4	3	9	2	3	4	0	0	9	1	8	0	0	162	9.49993e+06	734335	500042	0	0
	2	175	1	4	4	18	0	7	0	0	12	0	10	0	8	0	9	103	8.05213e+06	163990	464135	0	0
	0	156	2	2	0	1	5	4	10	3	15	0	3	2	6	0	19	49	9.62431e+06	927908	524136	0	0
	2	176	1	4	3	13	2	4	0	3	12	0	10	0	8	0	8	99	8.57152e+06	301923	473328	0	0
	0	117	0	4	3	7	1	4	9	3	22	0	4	2	1	0	8	159	9.3622e+06	520593	482303	0	0
	3	107	1	4	5	6	3	4	11	1	29	0	4	0	6	0	17	174	8.3192e+06	160873	460792	0	0
	2	175	1	3	4	18	0	7	1	0	12	0	13	0	8	0	8	58	8.01532e+06	151069	470013	0	0
	3	122	0	4	3	5	2	5	11	0	15	1	0	5	5	0	0	108	8.41585e+06	630778	500399	0	0
	4	67	0	5	5	3	0	5	4	1	8	1	4	1	8	0	19	150	8.41851e+06	262450	473980	0	0
	4	78	0	5	5	5	0	5	5	1	11	1	3	1	8	0	19	166	8.41451e+06	198738	464923	0	0
	0	117	0	4	3	7	1	4	9	3	22	0	4	2	1	0	8	159	9.3622e+06	520593	482303	0	0
	1	144	0	4	3	7	2	4	9	3	22	0	4	2	1	0	6	158	9.19853e+06	543244	482411	0	0
	4	67	0	5	5	3	0	5	5	1	8	1	4	1	8	0	19	171	8.43896e+06	245522	470062	0	0
	1	144	1	4	2	5	2	5	9	3	22	0	4	2	1	0	6	157	9.36349e+06	690605	494218	0	0
	2	175	1	4	3	13	2	3	0	3	12	0	10	0	8	0	8	99	8.42101e+06	298226	471343	0	0
	2	176	1	4	3	13	0	5	0	3	12	0	12	0	8	0	9	97	8.61082e+06	301344	472663	0	0
	1	144	0	4	3	7	2	4	9	3	22	0	4	2	1	0	6	158	9.19853e+06	543244	482411	0	0
	2	174	0	4	3	7	2	4	9	3	21	0	4	2	1	0	6	105	9.1722e+06	537637	487315	0	0
	4	116	0	5	4	5	1	4	11	0	15	1	1	4	6	0	1	117	8.56018e+06	584861	497615	0	0
	1	144	0	4	2	6	2	4	8	3	22	0	4	2	0	0	6	158	9.18048e+06	619658	494123	0	0
	1	144	1	4	2	6	2	5	8	3	23	0	4	2	0	0	7	159	9.26422e+06	647717	490215	0	0
	4	78	0	5	5	5	0	5	4	0	11	1	3	1	8	0	19	145	8.31834e+06	559368	489824	0	0
	4	105	0	5	3	5	2	5	12	0	15	1	1	5	5	0	0	108	8.4355e+06	640705	498265	0	0
	1	202	2	2	5	4	0	8	6	1	16	0	15	0	6	0	5	23	8.23657e+06	181907	483301	0	0
	4	78	0	5	4	3	0	5	5	1	11	1	3	1	8	0	19	145	8.37879e+06	258275	471790	0	0
	1	143	1	4	5	5	9	2	3	4	0	0	9	1	8	0	0	162	9.45109e+06	581854	488439	0	0
	1	144	1	4	2	6	3	4	8	3	22	0	3	2	0	0	6	158	9.2738e+06	650652	488607	0	0
--------------------------------------------------
#Generation	No.	-->11
#Variable_vector	Fitness_vector	Constraint_violation	Overall_penalty
	2	176	1	4	3	13	1	4	0	3	12	0	10	0	8	0	8	99	8.63127e+06	301726	469809	0	0
	0	170	2	2	1	1	4	4	10	3	15	0	3	2	6	0	19	49	9.57775e+06	897844	519995	0	0
	1	202	2	2	5	4	0	8	6	1	16	0	14	0	6	0	5	0	8.22421e+06	175547	486282	0	0
	0	169	2	2	0	1	4	4	10	3	15	0	3	2	6	0	19	49	9.58268e+06	908478	520790	0	0
	4	116	0	5	4	5	1	4	11	0	15	1	1	4	5	0	1	112	8.5576e+06	583535	498237	0	0
	2	175	1	4	4	18	1	6	1	3	12	0	10	0	8	0	8	103	9.11853e+06	164048	463781	0	0
	3	147	4	1	6	0	6	4	2	5	17	0	3	2	8	0	19	20	9.78149e+06	980421	521569	0	0
	2	115	0	4	6	1	5	4	14	0	14	1	4	1	1	0	4	188	8.73399e+06	889893	510806	0	0
	2	175	1	4	3	13	0	4	0	3	12	0	12	0	8	0	9	97	8.48104e+06	298907	471161	0	0
	3	142	4	1	6	2	6	4	2	5	17	0	3	2	8	0	19	20	9.70486e+06	763426	508049	0	0
	4	79	0	4	5	3	0	5	6	1	10	1	3	1	8	0	19	130	8.33683e+06	214302	471782	0	0
	3	159	0	4	3	20	0	7	9	0	25	0	12	0	3	0	14	1	7.94885e+06	134437	479293	0	0
	4	117	1	3	3	20	0	7	9	0	25	0	12	0	3	0	15	42	7.97353e+06	149457	472317	0	0
	3	119	0	4	4	4	9	2	4	4	0	0	9	1	8	0	0	178	9.54981e+06	669433	493650	0	0
	4	78	0	5	5	5	0	5	5	1	11	1	3	1	8	0	19	145	8.39924e+06	191497	468319	0	0
	3	142	4	1	6	2	6	4	2	5	17	0	3	2	8	0	19	20	9.70486e+06	763426	508049	0	0
	2	115	0	4	6	1	5	4	14	0	14	1	4	1	1	0	4	188	8.73399e+06	889893	510806	0	0
	4	67	0	5	5	3	0	5	4	1	8	1	4	1	8	0	19	171	8.4368e+06	269692	470583	0	0
	2	140	1	4	4	3	9	2	3	4	0	0	9	1	8	0	0	162	9.49993e+06	734335	500042	0	0
	2	175	1	4	4	18	0	7	0	0	12	0	10	0	8	0	9	103	8.05213e+06	163990	464135	0	0
	2	176	1	4	3	13	2	4	0	3	12	0	10	0	8	0	8	99	8.57152e+06	301923	473328	0	0
	0	117	0	4	3	7	1	4	9	3	22	0	4	2	1	0	8	159	9.3622e+06	520593	482303	0	0
	3	107	1	4	5	6	3	4	11	1	29	0	4	0	6	0	17	174	8.3192e+06	160873	460792	0	0
	2	175	1	3	4	18	0	7	1	0	12	0	13	0	8	0	8	58	8.01532e+06	151069	470013	0	0
	3	122	0	4	3	5	2	5	11	0	15	1	0	5	5	0	0	108	8.41585e+06	630778	500399	0	0
	4	78	0	5	5	5	0	5	5	1	11	1	3	1	8	0	19	166	8.41451e+06	198738	464923	0	0
	0	117	0	4	3	7	1	4	9	3	22	0	4	2	1	0	8	159	9.3622e+06	520593	482303	0	0
	4	67	0	5	5	3	0	5	5	1	8	1	4	1	8	0	19	171	8.43896e+06	245522	470062	0	0
	1	144	1	4	2	5	2	5	9	3	22	0	4	2	1	0	6	157	9.36349e+06	690605	494218	0	0
	2	176	1	4	3	13	0	5	0	3	12	0	12	0	8	0	9	97	8.61082e+06	301344	472663	0	0
	2	174	0	4	3	7	2	4	9	3	21	0	4	2	1	0	6	105	9.1722e+06	537637	487315	0	0
	4	116	0	5	4	5	1	4	11	0	15	1	1	4	6	0	1	117	8.56018e+06	584861	497615	0	0
	1	144	1	4	2	6	2	5	8	3	23	0	4	2	0	0	7	159	9.26422e+06	647717	490215	0	0
	4	78	0	5	5	5	0	5	4	0	11	1	3	1	8	0	19	145	8.31834e+06	559368	489824	0	0
	4	105	0	5	3	5	2	5	12	0	15	1	1	5	5	0	0	108	8.4355e+06	640705	498265	0	0
	1	202	2	2	5	4	0	8	6	1	16	0	15	0	6	0	5	23	8.23657e+06	181907	483301	0	0
	4	78	0	5	4	3	0	5	5	1	11	1	3	1	8	0	19	145	8.37879e+06	258275	471790	0	0
	1	143	1	4	5	5	9	2	3	4	0	0	9	1	8	0	0	162	9.45109e+06	581854	488439	0	0
	1	144	1	4	2	6	3	4	8	3	22	0	3	2	0	0	6	158	9.2738e+06	650652	488607	0	0
	4	91	0	5	5	3	0	5	5	1	6	1	3	1	8	0	19	130	8.27966e+06	249985	471881	0	0
	4	78	0	5	4	3	0	5	4	1	11	1	3	1	8	0	19	152	8.38194e+06	286291	470968	0	0
	4	78	0	5	5	5	0	5	5	1	11	1	3	1	8	0	18	161	8.40778e+06	196182	466121	0	0
	1	144	0	4	2	5	2	4	9	3	22	0	4	2	1	0	6	158	9.29216e+06	654124	499171	0	0
	1	144	0	4	2	8	2	4	9	3	22	0	4	2	1	0	7	158	9.2466e+06	548931	488372	0	0
	1	144	0	4	2	6	2	4	7	3	22	0	4	2	0	0	6	158	9.11188e+06	619658	493217	0	0
	4	67	0	5	5	3	0	5	5	1	8	1	4	1	8	0	19	171	8.43896e+06	245522	470062	0	0
	0	156	2	2	0	1	5	4	9	3	15	0	3	2	6	0	19	49	9.55336e+06	927908	523660	0	0
	2	175	1	4	4	18	1	6	0	3	12	0	11	0	8	0	8	102	9.08491e+06	163759	463916	0	0
	3	107	1	4	5	6	3	4	11	1	29	0	4	0	6	0	17	174	8.3192e+06	160873	460792	0	0
	1	202	2	2	5	4	0	8	6	1	16	0	14	0	6	0	6	18	8.23404e+06	180636	483897	0	0
--------------------------------------------------
#Generation	No.	-->12
#Variable_vector	Fitness_vector	Constraint_violation	Overall_penalty
	2	176	1	4	3	13	1	4	0	3	12	0	10	0	8	0	8	99	8.63127e+06	301726	469809	0	0
	0	170	2	2	1	1	4	4	10	3	15	0	3	2	6	0	19	49	9.57775e+06	897844	519995	0	0
	1	202	2	2	5	4	0	8	6	1	16	0	14	0	6	0	5	0	8.22421e+06	175547	486282	0	0
	0	169	2	2	0	1	4	4	10	3	15	0	3	2	6	0	19	49	9.58268e+06	908478	520790	0	0
	4	116	0	5	4	5	1	4	11	0	15	1	1	4	5	0	1	112	8.5576e+06	583535	498237	0	0
	2	175	1	4	4	18	1	6	1	3	12	0	10	0	8	0	8	103	9.11853e+06	164048	463781	0	0
	3	147	4	1	6	0	6	4	2	5	17	0	3	2	8	0	19	20	9.78149e+06	980421	521569	0	0
	2	115	0	4	6	1	5	4	14	0	14	1	4	1	1	0	4	188	8.73399e+06	889893	510806	0	0
	2	175	1	4	3	13	0	4	0	3	12	0	12	0	8	0	9	97	8.48104e+06	298907	471161	0	0
	3	142	4	1	6	2	6	4	2	5	17	0	3	2	8	0	19	20	9.70486e+06	763426	508049	0	0
	4	79	0	4	5	3	0	5	6	1	10	1	3	1	8	0	19	130	8.33683e+06	214302	471782	0	0
	3	159	0	4	3	20	0	7	9	0	25	0	12	0	3	0	14	1	7.94885e+06	134437	479293	0	0
	4	117	1	3	3	20	0	7	9	0	25	0	12	0	3	0	15	42	7.97353e+06	149457	472317	0	0
	3	119	0	4	4	4	9	2	4	4	0	0	9	1	8	0	0	178	9.54981e+06	669433	493650	0	0
	4	78	0	5	5	5	0	5	5	1	11	1	3	1	8	0	19	145	8.39924e+06	191497	468319	0	0
	2	115	0	4	6	1	5	4	14	0	14	1	4	1	1	0	4	188	8.73399e+06	889893	510806	0	0
	2	140	1	4	4	3	9	2	3	4	0	0	9	1	8	0	0	162	9.49993e+06	734335	500042	0	0
	2	175	1	4	4	18	0	7	0	0	12	0	10	0	8	0	9	103	8.05213e+06	163990	464135	0	0
	0	117	0	4	3	7	1	4	9	3	22	0	4	2	1	0	8	159	9.3622e+06	520593	482303	0	0
	3	107	1	4	5	6	3	4	11	1	29	0	4	0	6	0	17	174	8.3192e+06	160873	460792	0	0
	2	175	1	3	4	18	0	7	1	0	12	0	13	0	8	0	8	58	8.01532e+06	151069	470013	0	0
	4	78	0	5	5	5	0	5	5	1	11	1	3	1	8	0	19	166	8.41451e+06	198738	464923	0	0
	0	117	0	4	3	7	1	4	9	3	22	0	4	2	1	0	8	159	9.3622e+06	520593	482303	0	0
	1	144	1	4	2	5	2	5	9	3	22	0	4	2	1	0	6	157	9.36349e+06	690605	494218	0	0
	2	174	0	4	3	7	2	4	9	3	21	0	4	2	1	0	6	105	9.1722e+06	537637	487315	0	0
	4	116	0	5	4	5	1	4	11	0	15	1	1	4	6	0	1	117	8.56018e+06	584861	497615	0	0
	4	78	0	5	5	5	0	5	4	0	11	1	3	1	8	0	19	145	8.31834e+06	559368	489824	0	0
	4	105	0	5	3	5	2	5	12	0	15	1	1	5	5	0	0	108	8.4355e+06	640705	498265	0	0
	1	202	2	2	5	4	0	8	6	1	16	0	15	0	6	0	5	23	8.23657e+06	181907	483301	0	0
	4	91	0	5	5	3	0	5	5	1	6	1	3	1	8	0	19	130	8.27966e+06	249985	471881	0	0
	4	78	0	5	5	5	0	5	5	1	11	1	3	1	8	0	18	161	8.40778e+06	196182	466121	0	0
	1	144	0	4	2	6	2	4	7	3	22	0	4	2	0	0	6	158	9.11188e+06	619658	493217	0	0
	4	67	0	5	5	3	0	5	5	1	8	1	4	1	8	0	19	171	8.43896e+06	245522	470062	0	0
	0	156	2	2	0	1	5	4	9	3	15	0	3	2	6	0	19	49	9.55336e+06	927908	523660	0	0
	2	175	1	4	4	18	1	6	0	3	12	0	11	0	8	0	8	102	9.08491e+06	163759	463916	0	0
	3	107	1	4	5	6	3	4	11	1	29	0	4	0	6	0	17	174	8.3192e+06	160873	460792	0	0
	1	202	2	2	5	4	0	8	6	1	16	0	14	0	6	0	6	18	8.23404e+06	180636	483897	0	0
	1	144	1	4	2	6	4	4	7	3	22	0	3	2	0	0	6	156	9.24172e+06	650357	485144	0	0
	3	159	0	4	3	20	0	7	9	0	25	0	12	0	3	0	14	1	7.94885e+06	134437	479293	0	0
	1	144	0	4	2	6	1	5	8	3	23	0	4	2	0	0	7	159	9.32734e+06	644902	483664	0	0
	4	67	0	5	5	3	0	5	4	1	7	1	4	1	8	0	19	171	8.40454e+06	269692	470531	0	0
	1	144	1	4	1	7	3	4	8	3	23	0	3	2	0	0	6	158	9.26074e+06	658593	486827	0	0
	3	143	0	5	3	5	2	5	12	0	15	1	1	5	5	0	0	57	8.39986e+06	626150	504690	0	0
	3	156	4	1	6	2	6	4	2	5	17	0	3	2	8	0	19	58	9.73135e+06	780937	500925	0	0
	2	176	1	4	3	13	2	4	0	3	12	0	11	0	8	0	8	99	8.57152e+06	301923	473328	0	0
	4	78	0	5	4	3	0	5	5	1	11	1	3	1	8	0	19	145	8.37879e+06	258275	471790	0	0
	3	142	4	1	6	2	6	4	2	5	17	0	3	2	8	0	19	20	9.70486e+06	763426	508049	0	0
	2	176	1	4	3	13	2	4	0	3	12	0	10	0	8	0	8	98	8.57096e+06	301634	473463	0	0
	2	176	1	4	3	13	0	5	0	3	12	0	12	0	8	0	10	91	8.61061e+06	301869	472417	0	0
	0	124	0	4	3	7	2	4	8	3	23	0	4	2	1	0	8	159	9.21243e+06	527988	485933	0	0
--------------------------------------------------
#Generation	No.	-->13
#Variable_vector	Fitness_vector	Constraint_violation	Overall_penalty
	2	176	1	4	3	13	1	4	0	3	12	0	10	0	8	0	8	99	8.63127e+06	301726	469809	0	0
	0	170	2	2	1	1	4	4	10	3	15	0	3	2	6	0	19	49	9.57775e+06	897844	519995	0	0
	1	202	2	2	5	4	0	8	6	1	16	0	14	0	6	0	5	0	8.22421e+06	175547	486282	0	0
	0	169	2	2	0	1	4	4	10	3	15	0	3	2	6	0	19	49	9.58268e+06	908478	520790	0	0
	4	116	0	5	4	5	1	4	11	0	15	1	1	4	5	0	1	112	8.5576e+06	583535	498237	0	0
	2	175	1	4	4	18	1	6	1	3	12	0	10	0	8	0	8	103	9.11853e+06	164048	463781	0	0
	3	147	4	1	6	0	6	4	2	5	17	0	3	2	8	0	19	20	9.78149e+06	980421	521569	0	0
	2	115	0	4	6	1	5	4	14	0	14	1	4	1	1	0	4	188	8.73399e+06	889893	510806	0	0
	2	175	1	4	3	13	0	4	0	3	12	0	12	0	8	0	9	97	8.48104e+06	298907	471161	0	0
	3	159	0	4	3	20	0	7	9	0	25	0	12	0	3	0	14	1	7.94885e+06	134437	479293	0	0
	4	117	1	3	3	20	0	7	9	0	25	0	12	0	3	0	15	42	7.97353e+06	149457	472317	0	0
	3	119	0	4	4	4	9	2	4	4	0	0	9	1	8	0	0	178	9.54981e+06	669433	493650	0	0
	4	78	0	5	5	5	0	5	5	1	11	1	3	1	8	0	19	145	8.39924e+06	191497	468319	0	0
	2	115	0	4	6	1	5	4	14	0	14	1	4	1	1	0	4	188	8.73399e+06	889893	510806	0	0
	2	140	1	4	4	3	9	2	3	4	0	0	9	1	8	0	0	162	9.49993e+06	734335	500042	0	0
	2	175	1	4	4	18	0	7	0	0	12	0	10	0	8	0	9	103	8.05213e+06	163990	464135	0	0
	0	117	0	4	3	7	1	4	9	3	22	0	4	2	1	0	8	159	9.3622e+06	520593	482303	0	0
	3	107	1	4	5	6	3	4	11	1	29	0	4	0	6	0	17	174	8.3192e+06	160873	460792	0	0
	2	175	1	3	4	18	0	7	1	0	12	0	13	0	8	0	8	58	8.01532e+06	151069	470013	0	0
	0	117	0	4	3	7	1	4	9	3	22	0	4	2	1	0	8	159	9.3622e+06	520593	482303	0	0
	1	144	1	4	2	5	2	5	9	3	22	0	4	2	1	0	6	157	9.36349e+06	690605	494218	0	0
	2	174	0	4	3	7	2	4	9	3	21	0	4	2	1	0	6	105	9.1722e+06	537637	487315	0	0
	4	116	0	5	4	5	1	4	11	0	15	1	1	4	6	0	1	117	8.56018e+06	584861	497615	0	0
	4	78	0	5	5	5	0	5	4	0	11	1	3	1	8	0	19	145	8.31834e+06	559368	489824	0	0
	4	105	0	5	3	5	2	5	12	0	15	1	1	5	5	0	0	108	8.4355e+06	640705	498265	0	0
	4	91	0	5	5	3	0	5	5	1	6	1	3	1	8	0	19	130	8.27966e+06	249985	471881	0	0
	4	78	0	5	5	5	0	5	5	1	11	1	3	1	8	0	18	161	8.40778e+06	196182	466121	0	0
	1	144	0	4	2	6	2	4	7	3	22	0	4	2	0	0	6	158	9.11188e+06	619658	493217	0	0
	4	67	0	5	5	3	0	5	5	1	8	1	4	1	8	0	19	171	8.43896e+06	245522	470062	0	0
	0	156	2	2	0	1	5	4	9	3	15	0	3	2	6	0	19	49	9.55336e+06	927908	523660	0	0
	3	107	1	4	5	6	3	4	11	1	29	0	4	0	6	0	17	174	8.3192e+06	160873	460792	0	0
	1	202	2	2	5	4	0	8	6	1	16	0	14	0	6	0	6	18	8.23404e+06	180636	483897	0	0
	1	144	1	4	2	6	4	4	7	3	22	0	3	2	0	0	6	156	9.24172e+06	650357	485144	0	0
	3	159	0	4	3	20	0	7	9	0	25	0	12	0	3	0	14	1	7.94885e+06	134437	479293	0	0
	1	144	0	4	2	6	1	5	8	3	23	0	4	2	0	0	7	159	9.32734e+06	644902	483664	0	0
	1	144	1	4	1	7	3	4	8	3	23	0	3	2	0	0	6	158	9.26074e+06	658593	486827	0	0
	3	143	0	5	3	5	2	5	12	0	15	1	1	5	5	0	0	57	8.39986e+06	626150	504690	0	0
	3	156	4	1	6	2	6	4	2	5	17	0	3	2	8	0	19	58	9.73135e+06	780937	500925	0	0
	2	176	1	4	3	13	2	4	0	3	12	0	11	0	8	0	8	99	8.57152e+06	301923	473328	0	0
	4	78	0	5	4	3	0	5	5	1	11	1	3	1	8	0	19	145	8.37879e+06	258275	471790	0	0
	2	176	1	4	3	13	2	4	0	3	12	0	10	0	8	0	8	98	8.57096e+06	301634	473463	0	0
	2	176	1	4	3	13	0	5	0	3	12	0	12	0	8	0	10	91	8.61061e+06	301869	472417	0	0
	0	124	0	4	3	7	2	4	8	3	23	0	4	2	1	0	8	159	9.21243e+06	527988	485933	0	0
	3	147	4	1	6	2	6	4	2	5	17	0	2	2	8	0	19	19	9.68205e+06	764837	507820	0	0
	4	67	0	5	5	3	0	5	4	1	6	1	4	1	8	0	19	171	8.40238e+06	269692	470555	0	0
	3	147	4	1	6	0	6	4	2	5	17	0	3	2	8	0	19	20	9.78149e+06	980421	521569	0	0
	3	115	0	4	5	3	0	5	6	1	8	1	3	1	8	0	19	131	8.30559e+06	217370	470859	0	0
	4	78	0	5	5	5	0	5	5	1	11	1	3	1	8	0	19	166	8.41451e+06	198738	464923	0	0
	2	175	0	5	4	18	0	7	1	0	13	0	11	0	8	0	10	99	8.06539e+06	165289	463814	0	0
	4	78	1	4	4	3	0	5	5	1	10	1	3	1	8	0	19	142	8.34477e+06	257240	471773	0	0
--------------------------------------------------
#Generation	No.	-->14
#Variable_vector	Fitness_vector	Constraint_violation	Overall_penalty
	2	176	1	4	3	13	1	4	0	3	12	0	10	0	8	0	8	99	8.63127e+06	301726	469809	0	0
	0	170	2	2	1	1	4	4	10	3	15	0	3	2	6	0	19	49	9.57775e+06	897844	519995	0	0
	1	202	2	2	5	4	0	8	6	1	16	0	14	0	6	0	5	0	8.22421e+06	175547	486282	0	0
	0	169	2	2	0	1	4	4	10	3	15	0	3	2	6	0	19	49	9.58268e+06	908478	520790	0	0
	2	175	1	4	4	18	1	6	1	3	12	0	10	0	8	0	8	103	9.11853e+06	164048	463781	0	0
	2	115	0	4	6	1	5	4	14	0	14	1	4	1	1	0	4	188	8.73399e+06	889893	510806	0	0
	2	175	1	4	3	13	0	4	0	3	12	0	12	0	8	0	9	97	8.48104e+06	298907	471161	0	0
	3	159	0	4	3	20	0	7	9	0	25	0	12	0	3	0	14	1	7.94885e+06	134437	479293	0	0
	4	117	1	3	3	20	0	7	9	0	25	0	12	0	3	0	15	42	7.97353e+06	149457	472317	0	0
	3	119	0	4	4	4	9	2	4	4	0	0	9	1	8	0	0	178	9.54981e+06	669433	493650	0	0
	2	115	0	4	6	1	5	4	14	0	14	1	4	1	1	0	4	188	8.73399e+06	889893	510806	0	0
	0	117	0	4	3	7	1	4	9	3	22	0	4	2	1	0	8	159	9.3622e+06	520593	482303	0	0
	3	107	1	4	5	6	3	4	11	1	29	0	4	0	6	0	17	174	8.3192e+06	160873	460792	0	0
	2	175	1	3	4	18	0	7	1	0	12	0	13	0	8	0	8	58	8.01532e+06	151069	470013	0	0
	0	117	0	4	3	7	1	4	9	3	22	0	4	2	1	0	8	159	9.3622e+06	520593	482303	0	0
	1	144	1	4	2	5	2	5	9	3	22	0	4	2	1	0	6	157	9.36349e+06	690605	494218	0	0
	2	174	0	4	3	7	2	4	9	3	21	0	4	2	1	0	6	105	9.1722e+06	537637	487315	0	0
	4	78	0	5	5	5	0	5	4	0	11	1	3	1	8	0	19	145	8.31834e+06	559368	489824	0	0
	4	105	0	5	3	5	2	5	12	0	15	1	1	5	5	0	0	108	8.4355e+06	640705	498265	0	0
	4	91	0	5	5	3	0	5	5	1	6	1	3	1	8	0	19	130	8.27966e+06	249985	471881	0	0
	4	78	0	5	5	5	0	5	5	1	11	1	3	1	8	0	18	161	8.40778e+06	196182	466121	0	0
	1	144	0	4	2	6	2	4	7	3	22	0	4	2	0	0	6	158	9.11188e+06	619658	493217	0	0
	0	156	2	2	0	1	5	4	9	3	15	0	3	2	6	0	19	49	9.55336e+06	927908	523660	0	0
	1	144	1	4	2	6	4	4	7	3	22	0	3	2	0	0	6	156	9.24172e+06	650357	485144	0	0
	3	159	0	4	3	20	0	7	9	0	25	0	12	0	3	0	14	1	7.94885e+06	134437	479293	0	0
	1	144	1	4	1	7	3	4	8	3	23	0	3	2	0	0	6	158	9.26074e+06	658593	486827	0	0
	3	143	0	5	3	5	2	5	12	0	15	1	1	5	5	0	0	57	8.39986e+06	626150	504690	0	0
	3	156	4	1	6	2	6	4	2	5	17	0	3	2	8	0	19	58	9.73135e+06	780937	500925	0	0
	2	176	1	4	3	13	2	4	0	3	12	0	11	0	8	0	8	99	8.57152e+06	301923	473328	0	0
	2	176	1	4	3	13	0	5	0	3	12	0	12	0	8	0	10	91	8.61061e+06	301869	472417	0	0
	0	124	0	4	3	7	2	4	8	3	23	0	4	2	1	0	8	159	9.21243e+06	527988	485933	0	0
	3	147	4	1	6	2	6	4	2	5	17	0	2	2	8	0	19	19	9.68205e+06	764837	507820	0	0
	4	67	0	5	5	3	0	5	4	1	6	1	4	1	8	0	19	171	8.40238e+06	269692	470555	0	0
	3	115	0	4	5	3	0	5	6	1	8	1	3	1	8	0	19	131	8.30559e+06	217370	470859	0	0
	4	78	0	5	5	5	0	5	5	1	11	1	3	1	8	0	19	166	8.41451e+06	198738	464923	0	0
	4	78	1	4	4	3	0	5	5	1	10	1	3	1	8	0	19	142	8.34477e+06	257240	471773	0	0
	3	107	1	4	5	6	4	4	11	1	29	0	4	1	7	0	17	174	8.44532e+06	160873	460770	0	0
	4	71	0	4	5	3	0	4	5	1	9	1	4	1	8	0	18	134	8.26581e+06	234616	473766	0	0
	2	140	1	4	4	3	9	2	3	4	0	0	9	1	8	0	0	162	9.49993e+06	734335	500042	0	0
	1	177	1	4	3	13	0	4	0	3	12	0	13	0	8	0	8	97	8.48469e+06	299162	471060	0	0
	3	147	4	1	6	2	6	4	2	5	17	0	3	2	8	0	19	20	9.70369e+06	765181	507661	0	0
	1	144	0	4	2	6	1	5	8	3	23	0	4	2	0	0	6	159	9.32701e+06	644978	483628	0	0
	2	140	1	4	4	3	9	2	3	4	0	0	9	1	8	0	0	162	9.49993e+06	734335	500042	0	0
	2	140	1	4	4	3	9	2	3	4	0	0	9	1	8	0	0	162	9.49993e+06	734335	500042	0	0
	4	116	0	4	4	5	1	4	11	0	15	1	1	4	6	0	1	117	8.55036e+06	584861	497452	0	0
	2	175	0	5	4	18	0	7	1	0	13	0	11	0	8	0	10	99	8.06539e+06	165289	463814	0	0
	2	175	0	5	2	15	0	4	0	3	13	0	13	0	8	0	9	98	8.56204e+06	303443	479845	0	0
	4	78	1	4	5	5	0	5	5	1	10	1	3	1	8	0	17	160	8.37537e+06	195733	465821	0	0
	3	147	4	1	6	0	6	4	2	5	17	0	2	2	8	0	19	20	9.7605e+06	980421	521566	0	0
	1	202	2	2	5	4	0	8	6	1	16	0	14	0	6	0	6	18	8.23404e+06	180636	483897	0	0
--------------------------------------------------
#Generation	No.	-->15
#Variable_vector	Fitness_vector	Constraint_violation	Overall_penalty
	2	176	1	4	3	13	1	4	0	3	12	0	10	0	8	0	8	99	8.63127e+06	301726	469809	0	0
	1	202	2	2	5	4	0	8	6	1	16	0	14	0	6	0	5	0	8.22421e+06	175547	486282	0	0
	0	169	2	2	0	1	4	4	10	3	15	0	3	2	6	0	19	49	9.58268e+06	908478	520790	0	0
	2	175	1	4	4	18	1	6	1	3	12	0	10	0	8	0	8	103	9.11853e+06	164048	463781	0	0
	2	175	1	4	3	13	0	4	0	3	12	0	12	0	8	0	9	97	8.48104e+06	298907	471161	0	0
	3	159	0	4	3	20	0	7	9	0	25	0	12	0	3	0	14	1	7.94885e+06	134437	479293	0	0
	4	117	1	3	3	20	0	7	9	0	25	0	12	0	3	0	15	42	7.97353e+06	149457	472317	0	0
	0	117	0	4	3	7	1	4	9	3	22	0	4	2	1	0	8	159	9.3622e+06	520593	482303	0	0
	3	107	1	4	5	6	3	4	11	1	29	0	4	0	6	0	17	174	8.3192e+06	160873	460792	0	0
	2	175	1	3	4	18	0	7	1	0	12	0	13	0	8	0	8	58	8.01532e+06	151069	470013	0	0
	0	117	0	4	3	7	1	4	9	3	22	0	4	2	1	0	8	159	9.3622e+06	520593	482303	0	0
	4	78	0	5	5	5	0	5	4	0	11	1	3	1	8	0	19	145	8.31834e+06	559368	489824	0	0
	4	105	0	5	3	5	2	5	12	0	15	1	1	5	5	0	0	108	8.4355e+06	640705	498265	0	0
	4	91	0	5	5	3	0	5	5	1	6	1	3	1	8	0	19	130	8.27966e+06	249985	471881	0	0
	4	78	0	5	5	5	0	5	5	1	11	1	3	1	8	0	18	161	8.40778e+06	196182	466121	0	0
	1	144	0	4	2	6	2	4	7	3	22	0	4	2	0	0	6	158	9.11188e+06	619658	493217	0	0
	0	156	2	2	0	1	5	4	9	3	15	0	3	2	6	0	19	49	9.55336e+06	927908	523660	0	0
	3	159	0	4	3	20	0	7	9	0	25	0	12	0	3	0	14	1	7.94885e+06	134437	479293	0	0
	1	144	1	4	1	7	3	4	8	3	23	0	3	2	0	0	6	158	9.26074e+06	658593	486827	0	0
	3	143	0	5	3	5	2	5	12	0	15	1	1	5	5	0	0	57	8.39986e+06	626150	504690	0	0
	3	156	4	1	6	2	6	4	2	5	17	0	3	2	8	0	19	58	9.73135e+06	780937	500925	0	0
	2	176	1	4	3	13	2	4	0	3	12	0	11	0	8	0	8	99	8.57152e+06	301923	473328	0	0
	2	176	1	4	3	13	0	5	0	3	12	0	12	0	8	0	10	91	8.61061e+06	301869	472417	0	0
	0	124	0	4	3	7	2	4	8	3	23	0	4	2	1	0	8	159	9.21243e+06	527988	485933	0	0
	3	147	4	1	6	2	6	4	2	5	17	0	2	2	8	0	19	19	9.68205e+06	764837	507820	0	0
	4	67	0	5	5	3	0	5	4	1	6	1	4	1	8	0	19	171	8.40238e+06	269692	470555	0	0
	3	115	0	4	5	3	0	5	6	1	8	1	3	1	8	0	19	131	8.30559e+06	217370	470859	0	0
	4	78	0	5	5	5	0	5	5	1	11	1	3	1	8	0	19	166	8.41451e+06	198738	464923	0	0
	4	78	1	4	4	3	0	5	5	1	10	1	3	1	8	0	19	142	8.34477e+06	257240	471773	0	0
	3	107	1	4	5	6	4	4	11	1	29	0	4	1	7	0	17	174	8.44532e+06	160873	460770	0	0
	4	71	0	4	5	3	0	4	5	1	9	1	4	1	8	0	18	134	8.26581e+06	234616	473766	0	0
	1	177	1	4	3	13	0	4	0	3	12	0	13	0	8	0	8	97	8.48469e+06	299162	471060	0	0
	3	147	4	1	6	2	6	4	2	5	17	0	3	2	8	0	19	20	9.70369e+06	765181	507661	0	0
	1	144	0	4	2	6	1	5	8	3	23	0	4	2	0	0	6	159	9.32701e+06	644978	483628	0	0
	2	175	0	5	4	18	0	7	1	0	13	0	11	0	8	0	10	99	8.06539e+06	165289	463814	0	0
	2	175	0	5	2	15	0	4	0	3	13	0	13	0	8	0	9	98	8.56204e+06	303443	479845	0	0
	4	78	1	4	5	5	0	5	5	1	10	1	3	1	8	0	17	160	8.37537e+06	195733	465821	0	0
	3	147	4	1	6	0	6	4	2	5	17	0	2	2	8	0	19	20	9.7605e+06	980421	521566	0	0
	1	202	2	2	5	4	0	8	6	1	16	0	14	0	6	0	6	18	8.23404e+06	180636	483897	0	0
	1	144	0	4	1	4	1	5	8	3	23	0	4	1	0	0	6	159	9.30524e+06	764600	492407	0	0
	3	116	0	4	5	1	5	4	14	0	14	1	4	1	1	0	4	188	8.71765e+06	898744	510179	0	0
	2	158	1	3	4	18	0	7	1	0	13	0	13	0	8	0	8	62	8.00899e+06	147502	470492	0	0
	4	116	0	5	3	5	2	5	12	0	14	1	1	5	5	0	0	104	8.43688e+06	644318	498174	0	0
	1	177	1	4	3	13	1	5	0	3	12	0	13	0	8	0	8	97	8.80669e+06	301902	472032	0	0
	1	144	1	4	2	6	4	4	7	3	22	0	3	2	0	0	6	156	9.24172e+06	650357	485144	0	0
	4	105	0	5	3	5	2	5	13	0	15	1	1	5	5	0	0	67	8.41478e+06	630066	503254	0	0
	0	170	2	2	1	1	4	4	10	3	15	0	3	2	7	0	19	80	9.59842e+06	908535	514983	0	0
	1	171	1	3	4	19	0	7	1	0	12	0	13	0	8	0	8	58	8.03756e+06	145169	469766	0	0
	3	115	1	4	5	3	0	5	6	1	9	1	3	1	8	0	19	131	8.30952e+06	217370	470642	0	0
	4	78	0	5	4	5	0	5	4	0	11	1	4	1	8	0	19	170	8.3996e+06	597645	486986	0	0
--------------------------------------------------
#Generation	No.	-->16
#Variable_vector	Fitness_vector	Constraint_violation	Overall_penalty
	1	202	2	2	5	4	0	8	6	1	16	0	14	0	6	0	5	0	8.22421e+06	175547	486282	0	0
	0	169	2	2	0	1	4	4	10	3	15	0	3	2	6	0	19	49	9.58268e+06	908478	520790	0	0
	2	175	1	4	3	13	0	4	0	3	12	0	12	0	8	0	9	97	8.48104e+06	298907	471161	0	0
	3	159	0	4	3	20	0	7	9	0	25	0	12	0	3	0	14	1	7.94885e+06	134437	479293	0	0
	0	117	0	4	3	7	1	4	9	3	22	0	4	2	1	0	8	159	9.3622e+06	520593	482303	0	0
	3	107	1	4	5	6	3	4	11	1	29	0	4	0	6	0	17	174	8.3192e+06	160873	460792	0	0
	2	175	1	3	4	18	0	7	1	0	12	0	13	0	8	0	8	58	8.01532e+06	151069	470013	0	0
	0	117	0	4	3	7	1	4	9	3	22	0	4	2	1	0	8	159	9.3622e+06	520593	482303	0	0
	4	78	0	5	5	5	0	5	4	0	11	1	3	1	8	0	19	145	8.31834e+06	559368	489824	0	0
	4	105	0	5	3	5	2	5	12	0	15	1	1	5	5	0	0	108	8.4355e+06	640705	498265	0	0
	4	78	0	5	5	5	0	5	5	1	11	1	3	1	8	0	18	161	8.40778e+06	196182	466121	0	0
	1	144	0	4	2	6	2	4	7	3	22	0	4	2	0	0	6	158	9.11188e+06	619658	493217	0	0
	0	156	2	2	0	1	5	4	9	3	15	0	3	2	6	0	19	49	9.55336e+06	927908	523660	0	0
	3	143	0	5	3	5	2	5	12	0	15	1	1	5	5	0	0	57	8.39986e+06	626150	504690	0	0
	3	156	4	1	6	2	6	4	2	5	17	0	3	2	8	0	19	58	9.73135e+06	780937	500925	0	0
	2	176	1	4	3	13	2	4	0	3	12	0	11	0	8	0	8	99	8.57152e+06	301923	473328	0	0
	2	176	1	4	3	13	0	5	0	3	12	0	12	0	8	0	10	91	8.61061e+06	301869	472417	0	0
	0	124	0	4	3	7	2	4	8	3	23	0	4	2	1	0	8	159	9.21243e+06	527988	485933	0	0
	3	147	4	1	6	2	6	4	2	5	17	0	2	2	8	0	19	19	9.68205e+06	764837	507820	0	0
	3	115	0	4	5	3	0	5	6	1	8	1	3	1	8	0	19	131	8.30559e+06	217370	470859	0	0
	4	78	0	5	5	5	0	5	5	1	11	1	3	1	8	0	19	166	8.41451e+06	198738	464923	0	0
	3	107	1	4	5	6	4	4	11	1	29	0	4	1	7	0	17	174	8.44532e+06	160873	460770	0	0
	4	71	0	4	5	3	0	4	5	1	9	1	4	1	8	0	18	134	8.26581e+06	234616	473766	0	0
	3	147	4	1	6	2	6	4	2	5	17	0	3	2	8	0	19	20	9.70369e+06	765181	507661	0	0
	1	144	0	4	2	6	1	5	8	3	23	0	4	2	0	0	6	159	9.32701e+06	644978	483628	0	0
	2	175	0	5	4	18	0	7	1	0	13	0	11	0	8	0	10	99	8.06539e+06	165289	463814	0	0
	2	175	0	5	2	15	0	4	0	3	13	0	13	0	8	0	9	98	8.56204e+06	303443	479845	0	0
	4	78	1	4	5	5	0	5	5	1	10	1	3	1	8	0	17	160	8.37537e+06	195733	465821	0	0
	3	147	4	1	6	0	6	4	2	5	17	0	2	2	8	0	19	20	9.7605e+06	980421	521566	0	0
	1	202	2	2	5	4	0	8	6	1	16	0	14	0	6	0	6	18	8.23404e+06	180636	483897	0	0
	1	144	0	4	1	4	1	5	8	3	23	0	4	1	0	0	6	159	9.30524e+06	764600	492407	0	0
	3	116	0	4	5	1	5	4	14	0	14	1	4	1	1	0	4	188	8.71765e+06	898744	510179	0	0
	4	116	0	5	3	5	2	5	12	0	14	1	1	5	5	0	0	104	8.43688e+06	644318	498174	0	0
	1	177	1	4	3	13	1	5	0	3	12	0	13	0	8	0	8	97	8.80669e+06	301902	472032	0	0
	1	144	1	4	2	6	4	4	7	3	22	0	3	2	0	0	6	156	9.24172e+06	650357	485144	0	0
	4	105	0	5	3	5	2	5	13	0	15	1	1	5	5	0	0	67	8.41478e+06	630066	503254	0	0
	0	170	2	2	1	1	4	4	10	3	15	0	3	2	7	0	19	80	9.59842e+06	908535	514983	0	0
	1	171	1	3	4	19	0	7	1	0	12	0	13	0	8	0	8	58	8.03756e+06	145169	469766	0	0
	4	78	0	5	4	5	0	5	4	0	11	1	4	1	8	0	19	170	8.3996e+06	597645	486986	0	0
	2	176	1	4	2	15	1	4	0	3	12	0	10	0	8	0	8	98	8.6985e+06	305831	478426	0	0
	2	175	0	5	3	13	0	4	0	3	13	0	13	0	8	0	9	99	8.49425e+06	299483	471180	0	0
	1	144	1	4	1	7	3	4	8	3	23	0	2	2	0	0	6	158	9.23976e+06	658593	486825	0	0
	2	176	1	4	4	12	1	4	0	3	12	0	11	0	8	0	8	99	8.65508e+06	279171	469055	0	0
	1	144	0	4	1	4	1	5	8	3	23	0	4	1	0	3	6	159	9.44185e+06	764600	492403	0	0
	1	144	1	4	1	7	3	4	8	3	23	0	3	2	0	0	5	108	9.23246e+06	643793	493768	0	0
	4	78	0	5	5	5	0	4	5	1	9	1	3	1	8	0	17	160	8.26903e+06	195162	465475	0	0
	3	158	0	4	3	20	0	7	9	0	25	0	12	0	3	0	14	16	7958080	139066	477048	0	0
	2	175	0	5	4	18	0	7	2	0	13	0	13	0	8	0	10	99	8.06539e+06	165289	463814	0	0
	3	147	4	1	6	2	5	4	2	5	18	0	3	2	8	0	19	83	9.70434e+06	784276	505914	0	0
	2	175	1	4	4	18	1	6	1	3	12	0	11	0	8	0	9	109	9.12212e+06	165718	462998	0	0
--------------------------------------------------
#Generation	No.	-->17
#Variable_vector	Fitness_vector	Constraint_violation	Overall_penalty
	1	202	2	2	5	4	0	8	6	1	16	0	14	0	6	0	5	0	8.22421e+06	175547	486282	0	0
	0	169	2	2	0	1	4	4	10	3	15	0	3	2	6	0	19	49	9.58268e+06	908478	520790	0	0
	3	159	0	4	3	20	0	7	9	0	25	0	12	0	3	0	14	1	7.94885e+06	134437	479293	0	0
	0	117	0	4	3	7	1	4	9	3	22	0	4	2	1	0	8	159	9.3622e+06	520593	482303	0	0
	3	107	1	4	5	6	3	4	11	1	29	0	4	0	6	0	17	174	8.3192e+06	160873	460792	0	0
	2	175	1	3	4	18	0	7	1	0	12	0	13	0	8	0	8	58	8.01532e+06	151069	470013	0	0
	0	117	0	4	3	7	1	4	9	3	22	0	4	2	1	0	8	159	9.3622e+06	520593	482303	0	0
	4	78	0	5	5	5	0	5	4	0	11	1	3	1	8	0	19	145	8.31834e+06	559368	489824	0	0
	4	105	0	5	3	5	2	5	12	0	15	1	1	5	5	0	0	108	8.4355e+06	640705	498265	0	0
	1	144	0	4	2	6	2	4	7	3	22	0	4	2	0	0	6	158	9.11188e+06	619658	493217	0	0
	3	143	0	5	3	5	2	5	12	0	15	1	1	5	5	0	0	57	8.39986e+06	626150	504690	0	0
	3	156	4	1	6	2	6	4	2	5	17	0	3	2	8	0	19	58	9.73135e+06	780937	500925	0	0
	2	176	1	4	3	13	2	4	0	3	12	0	11	0	8	0	8	99	8.57152e+06	301923	473328	0	0
	2	176	1	4	3	13	0	5	0	3	12	0	12	0	8	0	10	91	8.61061e+06	301869	472417	0	0
	0	124	0	4	3	7	2	4	8	3	23	0	4	2	1	0	8	159	9.21243e+06	527988	485933	0	0
	3	115	0	4	5	3	0	5	6	1	8	1	3	1	8	0	19	131	8.30559e+06	217370	470859	0	0
	3	107	1	4	5	6	4	4	11	1	29	0	4	1	7	0	17	174	8.44532e+06	160873	460770	0	0
	4	71	0	4	5	3	0	4	5	1	9	1	4	1	8	0	18	134	8.26581e+06	234616	473766	0	0
	1	144	0	4	2	6	1	5	8	3	23	0	4	2	0	0	6	159	9.32701e+06	644978	483628	0	0
	2	175	0	5	4	18	0	7	1	0	13	0	11	0	8	0	10	99	8.06539e+06	165289	463814	0	0
	2	175	0	5	2	15	0	4	0	3	13	0	13	0	8	0	9	98	8.56204e+06	303443	479845	0	0
	1	202	2	2	5	4	0	8	6	1	16	0	14	0	6	0	6	18	8.23404e+06	180636	483897	0	0
	1	144	0	4	1	4	1	5	8	3	23	0	4	1	0	0	6	159	9.30524e+06	764600	492407	0	0
	3	116	0	4	5	1	5	4	14	0	14	1	4	1	1	0	4	188	8.71765e+06	898744	510179	0	0
	1	177	1	4	3	13	1	5	0	3	12	0	13	0	8	0	8	97	8.80669e+06	301902	472032	0	0
	1	144	1	4	2	6	4	4	7	3	22	0	3	2	0	0	6	156	9.24172e+06	650357	485144	0	0
	0	170	2	2	1	1	4	4	10	3	15	0	3	2	7	0	19	80	9.59842e+06	908535	514983	0	0
	1	171	1	3	4	19	0	7	1	0	12	0	13	0	8	0	8	58	8.03756e+06	145169	469766	0	0
	4	78	0	5	4	5	0	5	4	0	11	1	4	1	8	0	19	170	8.3996e+06	597645	486986	0	0
	2	176	1	4	2	15	1	4	0	3	12	0	10	0	8	0	8	98	8.6985e+06	305831	478426	0	0
	2	175	0	5	3	13	0	4	0	3	13	0	13	0	8	0	9	99	8.49425e+06	299483	471180	0	0
	1	144	1	4	1	7	3	4	8	3	23	0	2	2	0	0	6	158	9.23976e+06	658593	486825	0	0
	2	176	1	4	4	12	1	4	0	3	12	0	11	0	8	0	8	99	8.65508e+06	279171	469055	0	0
	1	144	0	4	1	4	1	5	8	3	23	0	4	1	0	3	6	159	9.44185e+06	764600	492403	0	0
	1	144	1	4	1	7	3	4	8	3	23	0	3	2	0	0	5	108	9.23246e+06	643793	493768	0	0
	4	78	0	5	5	5	0	4	5	1	9	1	3	1	8	0	17	160	8.26903e+06	195162	465475	0	0
	2	175	1	4	4	18	1	6	1	3	12	0	11	0	8	0	9	109	9.12212e+06	165718	462998	0	0
	4	105	0	4	3	5	2	5	14	0	15	1	1	5	5	0	0	67	8.40439e+06	630066	503064	0	0
	3	147	4	1	6	2	5	4	1	5	18	0	2	2	8	0	19	83	9.57916e+06	784276	505564	0	0
	0	124	0	4	3	7	2	4	8	3	23	0	4	2	1	0	8	159	9.21243e+06	527988	485933	0	0
	3	147	4	1	6	0	6	4	2	5	17	0	2	2	8	0	19	20	9.7605e+06	980421	521566	0	0
	3	147	4	1	6	0	6	4	2	5	17	0	2	2	8	0	19	20	9.7605e+06	980421	521566	0	0
	3	158	0	4	3	20	0	7	9	0	25	0	13	0	3	0	14	16	7958080	139066	477048	0	0
	4	78	0	5	4	5	0	5	4	0	11	1	4	1	8	0	19	170	8.3996e+06	597645	486986	0	0
	0	156	2	2	0	1	5	4	9	3	15	0	2	2	6	0	19	49	9.53236e+06	927908	523656	0	0
	2	175	0	4	3	13	0	4	0	3	13	0	13	0	8	0	8	74	8.47055e+06	292327	474384	0	0
	3	156	4	1	6	2	6	4	2	5	17	0	3	2	8	0	19	79	9.74535e+06	788178	497529	0	0
	4	93	1	4	5	5	0	5	5	1	9	1	3	2	8	0	17	149	8.37246e+06	202564	464956	0	0
	3	107	1	4	5	6	4	4	10	1	29	0	4	0	6	0	17	173	8.35159e+06	161943	463750	0	0
	1	144	0	4	1	4	1	5	8	3	23	0	4	1	0	3	6	159	9.44185e+06	764600	492403	0	0
--------------------------------------------------
#Generation	No.	-->18
#Variable_vector	Fitness_vector	Constraint_violation	Overall_penalty
	1	202	2	2	5	4	0	8	6	1	16	0	14	0	6	0	5	0	8.22421e+06	175547	486282	0	0
	0	169	2	2	0	1	4	4	10	3	15	0	3	2	6	0	19	49	9.58268e+06	908478	520790	0	0
	3	159	0	4	3	20	0	7	9	0	25	0	12	0	3	0	14	1	7.94885e+06	134437	479293	0	0
	3	107	1	4	5	6	3	4	11	1	29	0	4	0	6	0	17	174	8.3192e+06	160873	460792	0	0
	2	175	1	3	4	18	0	7	1	0	12	0	13	0	8	0	8	58	8.01532e+06	151069	470013	0	0
	4	78	0	5	5	5	0	5	4	0	11	1	3	1	8	0	19	145	8.31834e+06	559368	489824	0	0
	4	105	0	5	3	5	2	5	12	0	15	1	1	5	5	0	0	108	8.4355e+06	640705	498265	0	0
	1	144	0	4	2	6	2	4	7	3	22	0	4	2	0	0	6	158	9.11188e+06	619658	493217	0	0
	3	143	0	5	3	5	2	5	12	0	15	1	1	5	5	0	0	57	8.39986e+06	626150	504690	0	0
	3	156	4	1	6	2	6	4	2	5	17	0	3	2	8	0	19	58	9.73135e+06	780937	500925	0	0
	2	176	1	4	3	13	2	4	0	3	12	0	11	0	8	0	8	99	8.57152e+06	301923	473328	0	0
	3	115	0	4	5	3	0	5	6	1	8	1	3	1	8	0	19	131	8.30559e+06	217370	470859	0	0
	3	107	1	4	5	6	4	4	11	1	29	0	4	1	7	0	17	174	8.44532e+06	160873	460770	0	0
	1	144	0	4	2	6	1	5	8	3	23	0	4	2	0	0	6	159	9.32701e+06	644978	483628	0	0
	2	175	0	5	4	18	0	7	1	0	13	0	11	0	8	0	10	99	8.06539e+06	165289	463814	0	0
	2	175	0	5	2	15	0	4	0	3	13	0	13	0	8	0	9	98	8.56204e+06	303443	479845	0	0
	1	202	2	2	5	4	0	8	6	1	16	0	14	0	6	0	6	18	8.23404e+06	180636	483897	0	0
	1	144	0	4	1	4	1	5	8	3	23	0	4	1	0	0	6	159	9.30524e+06	764600	492407	0	0
	3	116	0	4	5	1	5	4	14	0	14	1	4	1	1	0	4	188	8.71765e+06	898744	510179	0	0
	1	177	1	4	3	13	1	5	0	3	12	0	13	0	8	0	8	97	8.80669e+06	301902	472032	0	0
	1	144	1	4	2	6	4	4	7	3	22	0	3	2	0	0	6	156	9.24172e+06	650357	485144	0	0
	0	170	2	2	1	1	4	4	10	3	15	0	3	2	7	0	19	80	9.59842e+06	908535	514983	0	0
	1	171	1	3	4	19	0	7	1	0	12	0	13	0	8	0	8	58	8.03756e+06	145169	469766	0	0
	2	176	1	4	2	15	1	4	0	3	12	0	10	0	8	0	8	98	8.6985e+06	305831	478426	0	0
	2	175	0	5	3	13	0	4	0	3	13	0	13	0	8	0	9	99	8.49425e+06	299483	471180	0	0
	1	144	1	4	1	7	3	4	8	3	23	0	2	2	0	0	6	158	9.23976e+06	658593	486825	0	0
	2	176	1	4	4	12	1	4	0	3	12	0	11	0	8	0	8	99	8.65508e+06	279171	469055	0	0
	1	144	0	4	1	4	1	5	8	3	23	0	4	1	0	3	6	159	9.44185e+06	764600	492403	0	0
	1	144	1	4	1	7	3	4	8	3	23	0	3	2	0	0	5	108	9.23246e+06	643793	493768	0	0
	4	78	0	5	5	5	0	4	5	1	9	1	3	1	8	0	17	160	8.26903e+06	195162	465475	0	0
	2	175	1	4	4	18	1	6	1	3	12	0	11	0	8	0	9	109	9.12212e+06	165718	462998	0	0
	4	105	0	4	3	5	2	5	14	0	15	1	1	5	5	0	0	67	8.40439e+06	630066	503064	0	0
	3	147	4	1	6	2	5	4	1	5	18	0	2	2	8	0	19	83	9.57916e+06	784276	505564	0	0
	3	147	4	1	6	0	6	4	2	5	17	0	2	2	8	0	19	20	9.7605e+06	980421	521566	0	0
	0	156	2	2	0	1	5	4	9	3	15	0	2	2	6	0	19	49	9.53236e+06	927908	523656	0	0
	2	175	0	4	3	13	0	4	0	3	13	0	13	0	8	0	8	74	8.47055e+06	292327	474384	0	0
	3	156	4	1	6	2	6	4	2	5	17	0	3	2	8	0	19	79	9.74535e+06	788178	497529	0	0
	4	93	1	4	5	5	0	5	5	1	9	1	3	2	8	0	17	149	8.37246e+06	202564	464956	0	0
	3	107	1	4	5	6	4	4	10	1	29	0	4	0	6	0	17	173	8.35159e+06	161943	463750	0	0
	1	144	0	4	1	4	1	5	8	3	23	0	4	1	0	3	6	159	9.44185e+06	764600	492403	0	0
	4	78	0	5	5	5	0	5	4	0	11	1	3	1	8	0	19	86	8.27898e+06	539022	499364	0	0
	4	72	0	4	5	3	0	4	5	1	9	1	4	1	8	0	18	134	8.26336e+06	235374	473582	0	0
	4	105	0	4	3	5	2	5	14	0	15	1	1	5	5	0	0	67	8.40439e+06	630066	503064	0	0
	3	147	4	1	6	2	6	4	2	5	17	0	2	2	8	0	19	116	9.74675e+06	798287	492135	0	0
	3	114	0	4	4	5	0	5	5	0	11	1	4	1	8	0	19	170	8.36671e+06	600608	485878	0	0
	3	158	1	3	3	20	0	7	10	0	25	0	13	0	3	0	15	25	7.94886e+06	142145	475244	0	0
	3	147	4	1	6	0	5	4	2	5	17	0	2	2	8	0	19	15	9.74656e+06	970662	533991	0	0
	1	144	0	4	2	6	4	3	7	3	23	0	3	2	0	0	6	156	9.09425e+06	617625	489027	0	0
	3	107	1	4	5	6	4	4	11	2	29	0	4	0	6	0	17	173	9.05549e+06	522944	475897	0	0
	1	177	1	4	3	13	1	5	0	3	12	0	13	0	8	0	8	97	8.80669e+06	301902	472032	0	0
--------------------------------------------------
#Generation	No.	-->19
#Variable_vector	Fitness_vector	Constraint_violation	Overall_penalty
	1	202	2	2	5	4	0	8	6	1	16	0	14	0	6	0	5	0	8.22421e+06	175547	486282	0	0
	3	159	0	4	3	20	0	7	9	0	25	0	12	0	3	0	14	1	7.94885e+06	134437	479293	0	0
	3	107	1	4	5	6	3	4	11	1	29	0	4	0	6	0	17	174	8.3192e+06	160873	460792	0	0
	2	175	1	3	4	18	0	7	1	0	12	0	13	0	8	0	8	58	8.01532e+06	151069	470013	0	0
	4	78	0	5	5	5	0	5	4	0	11	1	3	1	8	0	19	145	8.31834e+06	559368	489824	0	0
	4	105	0	5	3	5	2	5	12	0	15	1	1	5	5	0	0	108	8.4355e+06	640705	498265	0	0
	1	144	0	4	2	6	2	4	7	3	22	0	4	2	0	0	6	158	9.11188e+06	619658	493217	0	0
	3	143	0	5	3	5	2	5	12	0	15	1	1	5	5	0	0	57	8.39986e+06	626150	504690	0	0
	2	176	1	4	3	13	2	4	0	3	12	0	11	0	8	0	8	99	8.57152e+06	301923	473328	0	0
	3	115	0	4	5	3	0	5	6	1	8	1	3	1	8	0	19	131	8.30559e+06	217370	470859	0	0
	3	107	1	4	5	6	4	4	11	1	29	0	4	1	7	0	17	174	8.44532e+06	160873	460770	0	0
	1	144	0	4	2	6	1	5	8	3	23	0	4	2	0	0	6	159	9.32701e+06	644978	483628	0	0
	2	175	0	5	4	18	0	7	1	0	13	0	11	0	8	0	10	99	8.06539e+06	165289	463814	0	0
	2	175	0	5	2	15	0	4	0	3	13	0	13	0	8	0	9	98	8.56204e+06	303443	479845	0	0
	1	202	2	2	5	4	0	8	6	1	16	0	14	0	6	0	6	18	8.23404e+06	180636	483897	0	0
	1	144	0	4	1	4	1	5	8	3	23	0	4	1	0	0	6	159	9.30524e+06	764600	492407	0	0
	3	116	0	4	5	1	5	4	14	0	14	1	4	1	1	0	4	188	8.71765e+06	898744	510179	0	0
	1	177	1	4	3	13	1	5	0	3	12	0	13	0	8	0	8	97	8.80669e+06	301902	472032	0	0
	0	170	2	2	1	1	4	4	10	3	15	0	3	2	7	0	19	80	9.59842e+06	908535	514983	0	0
	2	176	1	4	2	15	1	4	0	3	12	0	10	0	8	0	8	98	8.6985e+06	305831	478426	0	0
	2	175	0	5	3	13	0	4	0	3	13	0	13	0	8	0	9	99	8.49425e+06	299483	471180	0	0
	1	144	1	4	1	7	3	4	8	3	23	0	2	2	0	0	6	158	9.23976e+06	658593	486825	0	0
	2	176	1	4	4	12	1	4	0	3	12	0	11	0	8	0	8	99	8.65508e+06	279171	469055	0	0
	1	144	0	4	1	4	1	5	8	3	23	0	4	1	0	3	6	159	9.44185e+06	764600	492403	0	0
	1	144	1	4	1	7	3	4	8	3	23	0	3	2	0	0	5	108	9.23246e+06	643793	493768	0	0
	4	78	0	5	5	5	0	4	5	1	9	1	3	1	8	0	17	160	8.26903e+06	195162	465475	0	0
	2	175	1	4	4	18	1	6	1	3	12	0	11	0	8	0	9	109	9.12212e+06	165718	462998	0	0
	4	105	0	4	3	5	2	5	14	0	15	1	1	5	5	0	0	67	8.40439e+06	630066	503064	0	0
	3	147	4	1	6	2	5	4	1	5	18	0	2	2	8	0	19	83	9.57916e+06	784276	505564	0	0
	3	147	4	1	6	0	6	4	2	5	17	0	2	2	8	0	19	20	9.7605e+06	980421	521566	0	0
	0	156	2	2	0	1	5	4	9	3	15	0	2	2	6	0	19	49	9.53236e+06	927908	523656	0	0
	2	175	0	4	3	13	0	4	0	3	13	0	13	0	8	0	8	74	8.47055e+06	292327	474384	0	0
	1	144	0	4	1	4	1	5	8	3	23	0	4	1	0	3	6	159	9.44185e+06	764600	492403	0	0
	4	78	0	5	5	5	0	5	4	0	11	1	3	1	8	0	19	86	8.27898e+06	539022	499364	0	0
	4	72	0	4	5	3	0	4	5	1	9	1	4	1	8	0	18	134	8.26336e+06	235374	473582	0	0
	4	105	0	4	3	5	2	5	14	0	15	1	1	5	5	0	0	67	8.40439e+06	630066	503064	0	0
	3	114	0	4	4	5	0	5	5	0	11	1	4	1	8	0	19	170	8.36671e+06	600608	485878	0	0
	3	158	1	3	3	20	0	7	10	0	25	0	13	0	3	0	15	25	7.94886e+06	142145	475244	0	0
	3	147	4	1	6	0	5	4	2	5	17	0	2	2	8	0	19	15	9.74656e+06	970662	533991	0	0
	1	144	0	4	2	6	4	3	7	3	23	0	3	2	0	0	6	156	9.09425e+06	617625	489027	0	0
	3	107	1	4	5	6	4	4	11	2	29	0	4	0	6	0	17	173	9.05549e+06	522944	475897	0	0
	1	177	1	4	3	13	1	5	0	3	12	0	13	0	8	0	8	97	8.80669e+06	301902	472032	0	0
	2	175	0	5	4	18	0	7	1	0	13	0	11	0	8	0	10	99	8.06539e+06	165289	463814	0	0
	4	93	1	4	4	5	0	5	5	1	9	1	3	2	8	0	16	148	8.35171e+06	213590	463655	0	0
	1	144	1	4	2	6	4	4	7	3	22	0	3	2	0	0	6	156	9.24172e+06	650357	485144	0	0
	3	147	4	1	6	2	5	4	1	5	18	0	2	2	8	0	19	83	9.57916e+06	784276	505564	0	0
	3	107	1	4	5	6	3	4	9	1	29	0	4	0	6	0	17	173	8.24807e+06	163256	461661	0	0
	0	169	2	2	0	1	4	4	10	3	15	0	3	2	6	0	19	50	9.58333e+06	908823	520628	0	0
	3	147	4	1	6	2	6	4	1	5	17	0	2	2	8	0	19	116	9.64385e+06	798287	491916	0	0
	2	175	1	3	4	18	0	7	2	0	12	0	13	0	8	0	9	65	8.01936e+06	153052	469084	0	0
--------------------------------------------------
#Generation	No.	-->20
#Variable_vector	Fitness_vector	Constraint_violation	Overall_penalty
	1	202	2	2	5	4	0	8	6	1	16	0	14	0	6	0	5	0	8.22421e+06	175547	486282	0	0
	3	159	0	4	3	20	0	7	9	0	25	0	12	0	3	0	14	1	7.94885e+06	134437	479293	0	0
	3	107	1	4	5	6	3	4	11	1	29	0	4	0	6	0	17	174	8.3192e+06	160873	460792	0	0
	2	175	1	3	4	18	0	7	1	0	12	0	13	0	8	0	8	58	8.01532e+06	151069	470013	0	0
	4	78	0	5	5	5	0	5	4	0	11	1	3	1	8	0	19	145	8.31834e+06	559368	489824	0	0
	4	105	0	5	3	5	2	5	12	0	15	1	1	5	5	0	0	108	8.4355e+06	640705	498265	0	0
	1	144	0	4	2	6	2	4	7	3	22	0	4	2	0	0	6	158	9.11188e+06	619658	493217	0	0
	3	143	0	5	3	5	2	5	12	0	15	1	1	5	5	0	0	57	8.39986e+06	626150	504690	0	0
	2	176	1	4	3	13	2	4	0	3	12	0	11	0	8	0	8	99	8.57152e+06	301923	473328	0	0
	3	115	0	4	5	3	0	5	6	1	8	1	3	1	8	0	19	131	8.30559e+06	217370	470859	0	0
	3	107	1	4	5	6	4	4	11	1	29	0	4	1	7	0	17	174	8.44532e+06	160873	460770	0	0
	2	175	0	5	2	15	0	4	0	3	13	0	13	0	8	0	9	98	8.56204e+06	303443	479845	0	0
	1	202	2	2	5	4	0	8	6	1	16	0	14	0	6	0	6	18	8.23404e+06	180636	483897	0	0
	1	144	0	4	1	4	1	5	8	3	23	0	4	1	0	0	6	159	9.30524e+06	764600	492407	0	0
	3	116	0	4	5	1	5	4	14	0	14	1	4	1	1	0	4	188	8.71765e+06	898744	510179	0	0
	1	177	1	4	3	13	1	5	0	3	12	0	13	0	8	0	8	97	8.80669e+06	301902	472032	0	0
	0	170	2	2	1	1	4	4	10	3	15	0	3	2	7	0	19	80	9.59842e+06	908535	514983	0	0
	1	144	1	4	1	7	3	4	8	3	23	0	2	2	0	0	6	158	9.23976e+06	658593	486825	0	0
	2	176	1	4	4	12	1	4	0	3	12	0	11	0	8	0	8	99	8.65508e+06	279171	469055	0	0
	1	144	1	4	1	7	3	4	8	3	23	0	3	2	0	0	5	108	9.23246e+06	643793	493768	0	0
	4	78	0	5	5	5	0	4	5	1	9	1	3	1	8	0	17	160	8.26903e+06	195162	465475	0	0
	2	175	1	4	4	18	1	6	1	3	12	0	11	0	8	0	9	109	9.12212e+06	165718	462998	0	0
	3	147	4	1	6	0	6	4	2	5	17	0	2	2	8	0	19	20	9.7605e+06	980421	521566	0	0
	0	156	2	2	0	1	5	4	9	3	15	0	2	2	6	0	19	49	9.53236e+06	927908	523656	0	0
	2	175	0	4	3	13	0	4	0	3	13	0	13	0	8	0	8	74	8.47055e+06	292327	474384	0	0
	4	78	0	5	5	5	0	5	4	0	11	1	3	1	8	0	19	86	8.27898e+06	539022	499364	0	0
	4	105	0	4	3	5	2	5	14	0	15	1	1	5	5	0	0	67	8.40439e+06	630066	503064	0	0
	3	114	0	4	4	5	0	5	5	0	11	1	4	1	8	0	19	170	8.36671e+06	600608	485878	0	0
	3	158	1	3	3	20	0	7	10	0	25	0	13	0	3	0	15	25	7.94886e+06	142145	475244	0	0
	3	147	4	1	6	0	5	4	2	5	17	0	2	2	8	0	19	15	9.74656e+06	970662	533991	0	0
	1	144	0	4	2	6	4	3	7	3	23	0	3	2	0	0	6	156	9.09425e+06	617625	489027	0	0
	3	107	1	4	5	6	4	4	11	2	29	0	4	0	6	0	17	173	9.05549e+06	522944	475897	0	0
	1	177	1	4	3	13	1	5	0	3	12	0	13	0	8	0	8	97	8.80669e+06	301902	472032	0	0
	2	175	0	5	4	18	0	7	1	0	13	0	11	0	8	0	10	99	8.06539e+06	165289	463814	0	0
	1	144	1	4	2	6	4	4	7	3	22	0	3	2	0	0	6	156	9.24172e+06	650357	485144	0	0
	3	107	1	4	5	6	3	4	9	1	29	0	4	0	6	0	17	173	8.24807e+06	163256	461661	0	0
	0	169	2	2	0	1	4	4	10	3	15	0	3	2	6	0	19	50	9.58333e+06	908823	520628	0	0
	4	99	0	4	3	5	3	4	14	0	15	1	1	5	5	0	0	67	8.42773e+06	630379	500664	0	0
	0	156	2	2	0	1	5	4	9	3	15	0	2	2	6	0	19	49	9.53236e+06	927908	523656	0	0
	2	145	0	4	2	6	1	5	8	3	23	0	4	1	0	0	6	159	9.25904e+06	645809	483449	0	0
	3	114	0	4	4	5	0	5	5	0	11	1	4	1	8	0	19	170	8.36671e+06	600608	485878	0	0
	2	175	1	3	4	18	0	7	2	0	12	0	13	0	8	0	9	97	8.03728e+06	162263	464764	0	0
	1	144	0	4	0	5	1	5	8	3	24	0	4	1	0	3	6	159	9.43912e+06	765939	491248	0	0
	2	175	0	5	3	13	0	4	0	3	13	0	13	0	8	0	9	99	8.49425e+06	299483	471180	0	0
	2	176	1	4	1	16	1	4	0	3	12	0	11	0	8	0	7	98	8.6444e+06	356888	474913	0	0
	4	93	1	4	4	5	0	5	5	1	9	1	3	2	8	0	16	148	8.35171e+06	213590	463655	0	0
	4	72	0	4	5	3	0	4	5	1	9	1	4	1	8	0	18	134	8.26336e+06	235374	473582	0	0
	1	145	0	4	1	4	1	5	8	3	23	0	4	1	0	0	6	103	9.27372e+06	749177	499732	0	0
	2	146	4	1	6	2	5	4	1	5	18	0	2	2	8	0	19	129	9.62533e+06	798738	498527	0	0
	3	147	4	1	6	2	6	4	1	5	17	0	2	2	8	0	19	116	9.64385e+06	798287	491916	0	0
--------------------------------------------------
#Generation	No.	-->21
#Variable_vector	Fitness_vector	Constraint_violation	Overall_penalty
	1	202	2	2	5	4	0	8	6	1	16	0	14	0	6	0	5	0	8.22421e+06	175547	486282	0	0
	2	175	1	3	4	18	0	7	1	0	12	0	13	0	8	0	8	58	8.01532e+06	151069	470013	0	0
	4	78	0	5	5	5	0	5	4	0	11	1	3	1	8	0	19	145	8.31834e+06	559368	489824	0	0
	4	105	0	5	3	5	2	5	12	0	15	1	1	5	5	0	0	108	8.4355e+06	640705	498265	0	0
	1	144	0	4	2	6	2	4	7	3	22	0	4	2	0	0	6	158	9.11188e+06	619658	493217	0	0
	3	115	0	4	5	3	0	5	6	1	8	1	3	1	8	0	19	131	8.30559e+06	217370	470859	0	0
	2	175	0	5	2	15	0	4	0	3	13	0	13	0	8	0	9	98	8.56204e+06	303443	479845	0	0
	1	202	2	2	5	4	0	8	6	1	16	0	14	0	6	0	6	18	8.23404e+06	180636	483897	0	0
	1	144	0	4	1	4	1	5	8	3	23	0	4	1	0	0	6	159	9.30524e+06	764600	492407	0	0
	3	116	0	4	5	1	5	4	14	0	14	1	4	1	1	0	4	188	8.71765e+06	898744	510179	0	0
	1	177	1	4	3	13	1	5	0	3	12	0	13	0	8	0	8	97	8.80669e+06	301902	472032	0	0
	0	170	2	2	1	1	4	4	10	3	15	0	3	2	7	0	19	80	9.59842e+06	908535	514983	0	0
	2	176	1	4	4	12	1	4	0	3	12	0	11	0	8	0	8	99	8.65508e+06	279171	469055	0	0
	3	147	4	1	6	0	6	4	2	5	17	0	2	2	8	0	19	20	9.7605e+06	980421	521566	0	0
	0	156	2	2	0	1	5	4	9	3	15	0	2	2	6	0	19	49	9.53236e+06	927908	523656	0	0
	4	78	0	5	5	5	0	5	4	0	11	1	3	1	8	0	19	86	8.27898e+06	539022	499364	0	0
	4	105	0	4	3	5	2	5	14	0	15	1	1	5	5	0	0	67	8.40439e+06	630066	503064	0	0
	3	158	1	3	3	20	0	7	10	0	25	0	13	0	3	0	15	25	7.94886e+06	142145	475244	0	0
	3	147	4	1	6	0	5	4	2	5	17	0	2	2	8	0	19	15	9.74656e+06	970662	533991	0	0
	3	107	1	4	5	6	4	4	11	2	29	0	4	0	6	0	17	173	9.05549e+06	522944	475897	0	0
	1	177	1	4	3	13	1	5	0	3	12	0	13	0	8	0	8	97	8.80669e+06	301902	472032	0	0
	2	175	0	5	4	18	0	7	1	0	13	0	11	0	8	0	10	99	8.06539e+06	165289	463814	0	0
	1	144	1	4	2	6	4	4	7	3	22	0	3	2	0	0	6	156	9.24172e+06	650357	485144	0	0
	3	107	1	4	5	6	3	4	9	1	29	0	4	0	6	0	17	173	8.24807e+06	163256	461661	0	0
	0	169	2	2	0	1	4	4	10	3	15	0	3	2	6	0	19	50	9.58333e+06	908823	520628	0	0
	4	99	0	4	3	5	3	4	14	0	15	1	1	5	5	0	0	67	8.42773e+06	630379	500664	0	0
	0	156	2	2	0	1	5	4	9	3	15	0	2	2	6	0	19	49	9.53236e+06	927908	523656	0	0
	2	145	0	4	2	6	1	5	8	3	23	0	4	1	0	0	6	159	9.25904e+06	645809	483449	0	0
	2	175	1	3	4	18	0	7	2	0	12	0	13	0	8	0	9	97	8.03728e+06	162263	464764	0	0
	1	144	0	4	0	5	1	5	8	3	24	0	4	1	0	3	6	159	9.43912e+06	765939	491248	0	0
	2	175	0	5	3	13	0	4	0	3	13	0	13	0	8	0	9	99	8.49425e+06	299483	471180	0	0
	2	176	1	4	1	16	1	4	0	3	12	0	11	0	8	0	7	98	8.6444e+06	356888	474913	0	0
	4	93	1	4	4	5	0	5	5	1	9	1	3	2	8	0	16	148	8.35171e+06	213590	463655	0	0
	4	72	0	4	5	3	0	4	5	1	9	1	4	1	8	0	18	134	8.26336e+06	235374	473582	0	0
	1	145	0	4	1	4	1	5	8	3	23	0	4	1	0	0	6	103	9.27372e+06	749177	499732	0	0
	2	146	4	1	6	2	5	4	1	5	18	0	2	2	8	0	19	129	9.62533e+06	798738	498527	0	0
	3	147	4	1	6	2	6	4	1	5	17	0	2	2	8	0	19	116	9.64385e+06	798287	491916	0	0
	2	149	0	5	3	13	0	4	0	3	13	0	14	0	8	0	9	103	8.4892e+06	293149	472385	0	0
	3	141	0	4	3	5	2	5	14	0	15	1	0	5	5	0	0	67	8.37584e+06	628080	503452	0	0
	4	81	0	4	4	5	0	5	6	0	11	1	3	1	8	0	19	170	8.35554e+06	600097	486106	0	0
	3	108	1	4	4	4	3	4	11	1	29	0	4	1	7	0	17	174	8.3222e+06	165861	460533	0	0
	1	144	1	4	1	7	3	4	7	3	23	0	2	2	0	0	6	158	9.17809e+06	658593	486608	0	0
	2	145	0	4	3	12	1	5	7	3	23	0	4	1	0	0	6	159	9.2158e+06	345009	467390	0	0
	1	144	0	4	2	6	4	3	7	3	22	0	3	1	0	0	6	156	9.05354e+06	617625	489023	0	0
	3	142	1	3	3	20	0	7	11	0	25	0	14	0	3	0	15	25	7.94687e+06	137088	476352	0	0
	3	149	4	1	6	0	5	4	2	5	17	0	2	2	8	0	19	27	9.75514e+06	975404	531922	0	0
	0	167	2	2	0	1	5	4	10	3	15	0	3	2	6	0	18	44	9.61866e+06	929626	524204	0	0
	2	175	1	3	3	13	0	4	0	3	14	0	14	0	8	0	8	74	8.4565e+06	292327	474065	0	0
	4	78	0	5	5	5	0	4	5	1	8	1	3	1	8	0	17	160	8.25992e+06	195162	465493	0	0
	2	141	4	1	6	2	4	4	1	5	18	0	2	2	8	0	19	129	9.57737e+06	785810	495664	0	0
--------------------------------------------------
#Generation	No.	-->22
#Variable_vector	Fitness_vector	Constraint_violation	Overall_penalty
	1	202	2	2	5	4	0	8	6	1	16	0	14	0	6	0	5	0	8.22421e+06	175547	486282	0	0
	2	175	1	3	4	18	0	7	1	0	12	0	13	0	8	0	8	58	8.01532e+06	151069	470013	0	0
	4	78	0	5	5	5	0	5	4	0	11	1	3	1	8	0	19	145	8.31834e+06	559368	489824	0	0
	4	105	0	5	3	5	2	5	12	0	15	1	1	5	5	0	0	108	8.4355e+06	640705	498265	0	0
	1	144	0	4	2	6	2	4	7	3	22	0	4	2	0	0	6	158	9.11188e+06	619658	493217	0	0
	3	115	0	4	5	3	0	5	6	1	8	1	3	1	8	0	19	131	8.30559e+06	217370	470859	0	0
	2	175	0	5	2	15	0	4	0	3	13	0	13	0	8	0	9	98	8.56204e+06	303443	479845	0	0
	1	202	2	2	5	4	0	8	6	1	16	0	14	0	6	0	6	18	8.23404e+06	180636	483897	0	0
	1	144	0	4	1	4	1	5	8	3	23	0	4	1	0	0	6	159	9.30524e+06	764600	492407	0	0
	3	116	0	4	5	1	5	4	14	0	14	1	4	1	1	0	4	188	8.71765e+06	898744	510179	0	0
	1	177	1	4	3	13	1	5	0	3	12	0	13	0	8	0	8	97	8.80669e+06	301902	472032	0	0
	0	170	2	2	1	1	4	4	10	3	15	0	3	2	7	0	19	80	9.59842e+06	908535	514983	0	0
	2	176	1	4	4	12	1	4	0	3	12	0	11	0	8	0	8	99	8.65508e+06	279171	469055	0	0
	3	147	4	1	6	0	6	4	2	5	17	0	2	2	8	0	19	20	9.7605e+06	980421	521566	0	0
	0	156	2	2	0	1	5	4	9	3	15	0	2	2	6	0	19	49	9.53236e+06	927908	523656	0	0
	4	78	0	5	5	5	0	5	4	0	11	1	3	1	8	0	19	86	8.27898e+06	539022	499364	0	0
	4	105	0	4	3	5	2	5	14	0	15	1	1	5	5	0	0	67	8.40439e+06	630066	503064	0	0
	3	158	1	3	3	20	0	7	10	0	25	0	13	0	3	0	15	25	7.94886e+06	142145	475244	0	0
	3	147	4	1	6	0	5	4	2	5	17	0	2	2	8	0	19	15	9.74656e+06	970662	533991	0	0
	3	107	1	4	5	6	4	4	11	2	29	0	4	0	6	0	17	173	9.05549e+06	522944	475897	0	0
	2	175	0	5	4	18	0	7	1	0	13	0	11	0	8	0	10	99	8.06539e+06	165289	463814	0	0
	1	144	1	4	2	6	4	4	7	3	22	0	3	2	0	0	6	156	9.24172e+06	650357	485144	0	0
	3	107	1	4	5	6	3	4	9	1	29	0	4	0	6	0	17	173	8.24807e+06	163256	461661	0	0
	0	169	2	2	0	1	4	4	10	3	15	0	3	2	6	0	19	50	9.58333e+06	908823	520628	0	0
	4	99	0	4	3	5	3	4	14	0	15	1	1	5	5	0	0	67	8.42773e+06	630379	500664	0	0
	2	145	0	4	2	6	1	5	8	3	23	0	4	1	0	0	6	159	9.25904e+06	645809	483449	0	0
	2	175	1	3	4	18	0	7	2	0	12	0	13	0	8	0	9	97	8.03728e+06	162263	464764	0	0
	1	144	0	4	0	5	1	5	8	3	24	0	4	1	0	3	6	159	9.43912e+06	765939	491248	0	0
	2	175	0	5	3	13	0	4	0	3	13	0	13	0	8	0	9	99	8.49425e+06	299483	471180	0	0
	2	176	1	4	1	16	1	4	0	3	12	0	11	0	8	0	7	98	8.6444e+06	356888	474913	0	0
	4	93	1	4	4	5	0	5	5	1	9	1	3	2	8	0	16	148	8.35171e+06	213590	463655	0	0
	4	72	0	4	5	3	0	4	5	1	9	1	4	1	8	0	18	134	8.26336e+06	235374	473582	0	0
	1	145	0	4	1	4	1	5	8	3	23	0	4	1	0	0	6	103	9.27372e+06	749177	499732	0	0
	2	146	4	1	6	2	5	4	1	5	18	0	2	2	8	0	19	129	9.62533e+06	798738	498527	0	0
	3	147	4	1	6	2	6	4	1	5	17	0	2	2	8	0	19	116	9.64385e+06	798287	491916	0	0
	2	149	0	5	3	13	0	4	0	3	13	0	14	0	8	0	9	103	8.4892e+06	293149	472385	0	0
	3	141	0	4	3	5	2	5	14	0	15	1	0	5	5	0	0	67	8.37584e+06	628080	503452	0	0
	4	81	0	4	4	5	0	5	6	0	11	1	3	1	8	0	19	170	8.35554e+06	600097	486106	0	0
	1	144	1	4	1	7	3	4	7	3	23	0	2	2	0	0	6	158	9.17809e+06	658593	486608	0	0
	2	145	0	4	3	12	1	5	7	3	23	0	4	1	0	0	6	159	9.2158e+06	345009	467390	0	0
	1	144	0	4	2	6	4	3	7	3	22	0	3	1	0	0	6	156	9.05354e+06	617625	489023	0	0
	3	142	1	3	3	20	0	7	11	0	25	0	14	0	3	0	15	25	7.94687e+06	137088	476352	0	0
	3	149	4	1	6	0	5	4	2	5	17	0	2	2	8	0	19	27	9.75514e+06	975404	531922	0	0
	0	167	2	2	0	1	5	4	10	3	15	0	3	2	6	0	18	44	9.61866e+06	929626	524204	0	0
	2	175	1	3	3	13	0	4	0	3	14	0	14	0	8	0	8	74	8.4565e+06	292327	474065	0	0
	4	78	0	5	5	5	0	4	5	1	8	1	3	1	8	0	17	160	8.25992e+06	195162	465493	0	0
	2	141	4	1	6	2	4	4	1	5	18	0	2	2	8	0	19	129	9.57737e+06	785810	495664	0	0
	1	176	1	4	3	12	1	5	0	3	12	0	14	0	8	0	6	92	8.78721e+06	334855	474036	0	0
	1	144	0	4	0	5	2	6	8	3	24	0	4	1	0	3	6	159	9.51328e+06	793206	499043	0	0
	3	116	1	4	5	6	4	4	9	1	29	0	4	1	6	0	17	173	8.35608e+06	168186	460427	0	0
--------------------------------------------------
#Generation	No.	-->23
#Variable_vector	Fitness_vector	Constraint_violation	Overall_penalty
	1	202	2	2	5	4	0	8	6	1	16	0	14	0	6	0	5	0	8.22421e+06	175547	486282	0	0
	2	175	1	3	4	18	0	7	1	0	12	0	13	0	8	0	8	58	8.01532e+06	151069	470013	0	0
	4	78	0	5	5	5	0	5	4	0	11	1	3	1	8	0	19	145	8.31834e+06	559368	489824	0	0
	4	105	0	5	3	5	2	5	12	0	15	1	1	5	5	0	0	108	8.4355e+06	640705	498265	0	0
	1	144	0	4	2	6	2	4	7	3	22	0	4	2	0	0	6	158	9.11188e+06	619658	493217	0	0
	2	175	0	5	2	15	0	4	0	3	13	0	13	0	8	0	9	98	8.56204e+06	303443	479845	0	0
	1	144	0	4	1	4	1	5	8	3	23	0	4	1	0	0	6	159	9.30524e+06	764600	492407	0	0
	3	116	0	4	5	1	5	4	14	0	14	1	4	1	1	0	4	188	8.71765e+06	898744	510179	0	0
	0	170	2	2	1	1	4	4	10	3	15	0	3	2	7	0	19	80	9.59842e+06	908535	514983	0	0
	2	176	1	4	4	12	1	4	0	3	12	0	11	0	8	0	8	99	8.65508e+06	279171	469055	0	0
	3	147	4	1	6	0	6	4	2	5	17	0	2	2	8	0	19	20	9.7605e+06	980421	521566	0	0
	0	156	2	2	0	1	5	4	9	3	15	0	2	2	6	0	19	49	9.53236e+06	927908	523656	0	0
	4	105	0	4	3	5	2	5	14	0	15	1	1	5	5	0	0	67	8.40439e+06	630066	503064	0	0
	3	158	1	3	3	20	0	7	10	0	25	0	13	0	3	0	15	25	7.94886e+06	142145	475244	0	0
	3	147	4	1	6	0	5	4	2	5	17	0	2	2	8	0	19	15	9.74656e+06	970662	533991	0	0
	3	107	1	4	5	6	4	4	11	2	29	0	4	0	6	0	17	173	9.05549e+06	522944	475897	0	0
	2	175	0	5	4	18	0	7	1	0	13	0	11	0	8	0	10	99	8.06539e+06	165289	463814	0	0
	1	144	1	4	2	6	4	4	7	3	22	0	3	2	0	0	6	156	9.24172e+06	650357	485144	0	0
	3	107	1	4	5	6	3	4	9	1	29	0	4	0	6	0	17	173	8.24807e+06	163256	461661	0	0
	0	169	2	2	0	1	4	4	10	3	15	0	3	2	6	0	19	50	9.58333e+06	908823	520628	0	0
	4	99	0	4	3	5	3	4	14	0	15	1	1	5	5	0	0	67	8.42773e+06	630379	500664	0	0
	2	145	0	4	2	6	1	5	8	3	23	0	4	1	0	0	6	159	9.25904e+06	645809	483449	0	0
	2	175	1	3	4	18	0	7	2	0	12	0	13	0	8	0	9	97	8.03728e+06	162263	464764	0	0
	1	144	0	4	0	5	1	5	8	3	24	0	4	1	0	3	6	159	9.43912e+06	765939	491248	0	0
	2	176	1	4	1	16	1	4	0	3	12	0	11	0	8	0	7	98	8.6444e+06	356888	474913	0	0
	4	93	1	4	4	5	0	5	5	1	9	1	3	2	8	0	16	148	8.35171e+06	213590	463655	0	0
	1	145	0	4	1	4	1	5	8	3	23	0	4	1	0	0	6	103	9.27372e+06	749177	499732	0	0
	2	146	4	1	6	2	5	4	1	5	18	0	2	2	8	0	19	129	9.62533e+06	798738	498527	0	0
	3	141	0	4	3	5	2	5	14	0	15	1	0	5	5	0	0	67	8.37584e+06	628080	503452	0	0
	4	81	0	4	4	5	0	5	6	0	11	1	3	1	8	0	19	170	8.35554e+06	600097	486106	0	0
	1	144	1	4	1	7	3	4	7	3	23	0	2	2	0	0	6	158	9.17809e+06	658593	486608	0	0
	2	145	0	4	3	12	1	5	7	3	23	0	4	1	0	0	6	159	9.2158e+06	345009	467390	0	0
	1	144	0	4	2	6	4	3	7	3	22	0	3	1	0	0	6	156	9.05354e+06	617625	489023	0	0
	3	142	1	3	3	20	0	7	11	0	25	0	14	0	3	0	15	25	7.94687e+06	137088	476352	0	0
	0	167	2	2	0	1	5	4	10	3	15	0	3	2	6	0	18	44	9.61866e+06	929626	524204	0	0
	2	175	1	3	3	13	0	4	0	3	14	0	14	0	8	0	8	74	8.4565e+06	292327	474065	0	0
	4	78	0	5	5	5	0	4	5	1	8	1	3	1	8	0	17	160	8.25992e+06	195162	465493	0	0
	2	141	4	1	6	2	4	4	1	5	18	0	2	2	8	0	19	129	9.57737e+06	785810	495664	0	0
	1	144	0	4	0	5	2	6	8	3	24	0	4	1	0	3	6	159	9.51328e+06	793206	499043	0	0
	3	116	1	4	5	6	4	4	9	1	29	0	4	1	6	0	17	173	8.35608e+06	168186	460427	0	0
	4	94	0	5	5	5	0	5	4	0	11	1	3	1	8	0	19	86	8.24177e+06	550180	496515	0	0
	0	126	1	4	0	7	3	4	7	3	23	0	1	2	0	0	6	158	9.28241e+06	697972	493765	0	0
	3	140	0	4	5	4	0	5	6	1	8	1	4	1	8	0	19	131	8.30105e+06	204138	466247	0	0
	3	107	1	4	4	6	5	4	11	2	29	0	4	0	6	0	17	173	9.09944e+06	565444	478460	0	0
	3	116	0	4	5	1	5	4	14	0	14	1	4	1	1	0	4	188	8.71765e+06	898744	510179	0	0
	1	144	1	4	1	7	3	4	7	3	23	0	2	2	0	0	6	158	9.17809e+06	658593	486608	0	0
	3	149	4	1	6	0	5	4	2	5	17	0	2	2	8	0	19	27	9.75514e+06	975404	531922	0	0
	4	72	0	4	5	3	0	4	5	1	9	1	4	1	8	0	18	134	8.26336e+06	235374	473582	0	0
	2	176	1	4	0	20	1	4	0	3	12	0	11	0	8	0	8	97	8.65043e+06	360694	471906	0	0
	0	169	2	2	0	1	4	5	9	3	15	0	3	2	6	0	19	50	9.66715e+06	947077	516919	0	0
--------------------------------------------------
#Generation	No.	-->24
#Variable_vector	Fitness_vector	Constraint_violation	Overall_penalty
	1	202	2	2	5	4	0	8	6	1	16	0	14	0	6	0	5	0	8.22421e+06	175547	486282	0	0
	2	175	1	3	4	18	0	7	1	0	12	0	13	0	8	0	8	58	8.01532e+06	151069	470013	0	0
	4	78	0	5	5	5	0	5	4	0	11	1	3	1	8	0	19	145	8.31834e+06	559368	489824	0	0
	4	105	0	5	3	5	2	5	12	0	15	1	1	5	5	0	0	108	8.4355e+06	640705	498265	0	0
	2	175	0	5	2	15	0	4	0	3	13	0	13	0	8	0	9	98	8.56204e+06	303443	479845	0	0
	1	144	0	4	1	4	1	5	8	3	23	0	4	1	0	0	6	159	9.30524e+06	764600	492407	0	0
	3	116	0	4	5	1	5	4	14	0	14	1	4	1	1	0	4	188	8.71765e+06	898744	510179	0	0
	2	176	1	4	4	12	1	4	0	3	12	0	11	0	8	0	8	99	8.65508e+06	279171	469055	0	0
	3	147	4	1	6	0	6	4	2	5	17	0	2	2	8	0	19	20	9.7605e+06	980421	521566	0	0
	0	156	2	2	0	1	5	4	9	3	15	0	2	2	6	0	19	49	9.53236e+06	927908	523656	0	0
	4	105	0	4	3	5	2	5	14	0	15	1	1	5	5	0	0	67	8.40439e+06	630066	503064	0	0
	3	158	1	3	3	20	0	7	10	0	25	0	13	0	3	0	15	25	7.94886e+06	142145	475244	0	0
	3	107	1	4	5	6	4	4	11	2	29	0	4	0	6	0	17	173	9.05549e+06	522944	475897	0	0
	2	175	0	5	4	18	0	7	1	0	13	0	11	0	8	0	10	99	8.06539e+06	165289	463814	0	0
	0	169	2	2	0	1	4	4	10	3	15	0	3	2	6	0	19	50	9.58333e+06	908823	520628	0	0
	4	99	0	4	3	5	3	4	14	0	15	1	1	5	5	0	0	67	8.42773e+06	630379	500664	0	0
	2	175	1	3	4	18	0	7	2	0	12	0	13	0	8	0	9	97	8.03728e+06	162263	464764	0	0
	1	144	0	4	0	5	1	5	8	3	24	0	4	1	0	3	6	159	9.43912e+06	765939	491248	0	0
	2	176	1	4	1	16	1	4	0	3	12	0	11	0	8	0	7	98	8.6444e+06	356888	474913	0	0
	1	145	0	4	1	4	1	5	8	3	23	0	4	1	0	0	6	103	9.27372e+06	749177	499732	0	0
	3	141	0	4	3	5	2	5	14	0	15	1	0	5	5	0	0	67	8.37584e+06	628080	503452	0	0
	4	81	0	4	4	5	0	5	6	0	11	1	3	1	8	0	19	170	8.35554e+06	600097	486106	0	0
	1	144	1	4	1	7	3	4	7	3	23	0	2	2	0	0	6	158	9.17809e+06	658593	486608	0	0
	2	145	0	4	3	12	1	5	7	3	23	0	4	1	0	0	6	159	9.2158e+06	345009	467390	0	0
	1	144	0	4	2	6	4	3	7	3	22	0	3	1	0	0	6	156	9.05354e+06	617625	489023	0	0
	3	142	1	3	3	20	0	7	11	0	25	0	14	0	3	0	15	25	7.94687e+06	137088	476352	0	0
	0	167	2	2	0	1	5	4	10	3	15	0	3	2	6	0	18	44	9.61866e+06	929626	524204	0	0
	2	175	1	3	3	13	0	4	0	3	14	0	14	0	8	0	8	74	8.4565e+06	292327	474065	0	0
	4	78	0	5	5	5	0	4	5	1	8	1	3	1	8	0	17	160	8.25992e+06	195162	465493	0	0
	2	141	4	1	6	2	4	4	1	5	18	0	2	2	8	0	19	129	9.57737e+06	785810	495664	0	0
	3	116	1	4	5	6	4	4	9	1	29	0	4	1	6	0	17	173	8.35608e+06	168186	460427	0	0
	4	94	0	5	5	5	0	5	4	0	11	1	3	1	8	0	19	86	8.24177e+06	550180	496515	0	0
	0	126	1	4	0	7	3	4	7	3	23	0	1	2	0	0	6	158	9.28241e+06	697972	493765	0	0
	3	140	0	4	5	4	0	5	6	1	8	1	4	1	8	0	19	131	8.30105e+06	204138	466247	0	0
	3	116	0	4	5	1	5	4	14	0	14	1	4	1	1	0	4	188	8.71765e+06	898744	510179	0	0
	3	149	4	1	6	0	5	4	2	5	17	0	2	2	8	0	19	27	9.75514e+06	975404	531922	0	0
	2	176	1	4	0	20	1	4	0	3	12	0	11	0	8	0	8	97	8.65043e+06	360694	471906	0	0
	0	169	2	2	0	1	4	5	9	3	15	0	3	2	6	0	19	50	9.66715e+06	947077	516919	0	0
	3	147	4	1	6	0	5	4	2	5	17	0	2	2	8	0	19	15	9.74656e+06	970662	533991	0	0
	3	117	0	4	5	1	5	4	14	0	14	1	4	1	1	0	4	162	8.70175e+06	892083	513419	0	0
	1	144	0	4	0	5	2	5	8	3	24	0	4	1	0	3	6	159	9.39926e+06	772434	499892	0	0
	3	141	0	4	3	5	4	4	14	0	15	1	0	6	6	0	0	67	8448768	631708	496823	0	0
	1	144	0	4	0	5	2	6	8	3	25	0	3	1	0	3	6	159	9.49079e+06	793206	499043	0	0
	2	144	1	4	1	7	4	4	7	3	24	0	2	2	0	0	6	158	9.20507e+06	659300	483019	0	0
	3	141	0	4	2	0	2	5	14	0	15	1	0	5	5	0	0	67	9.02044e+06	933688	553094	0	0
	4	73	1	3	5	3	0	4	5	1	9	1	4	1	8	0	18	134	8.2358e+06	236364	472700	0	0
	3	137	0	5	4	5	0	5	5	1	9	1	3	2	8	0	16	148	8.34999e+06	216540	463254	0	0
	0	156	2	2	1	3	4	4	9	3	15	0	2	2	6	0	19	65	9.44675e+06	799506	509094	0	0
	3	108	1	4	4	6	5	4	11	2	29	0	4	0	6	0	17	173	9.09816e+06	565915	478346	0	0
	1	144	0	4	2	6	2	4	7	3	22	0	4	2	0	0	6	158	9.11188e+06	619658	493217	0	0
--------------------------------------------------
#Generation	No.	-->25
#Variable_vector	Fitness_vector	Constraint_violation	Overall_penalty
	1	202	2	2	5	4	0	8	6	1	16	0	14	0	6	0	5	0	8.22421e+06	175547	486282	0	0
	2	175	1	3	4	18	0	7	1	0	12	0	13	0	8	0	8	58	8.01532e+06	151069	470013	0	0
	4	78	0	5	5	5	0	5	4	0	11	1	3	1	8	0	19	145	8.31834e+06	559368	489824	0	0
	4	105	0	5	3	5	2	5	12	0	15	1	1	5	5	0	0	108	8.4355e+06	640705	498265	0	0
	2	175	0	5	2	15	0	4	0	3	13	0	13	0	8	0	9	98	8.56204e+06	303443	479845	0	0
	1	144	0	4	1	4	1	5	8	3	23	0	4	1	0	0	6	159	9.30524e+06	764600	492407	0	0
	2	176	1	4	4	12	1	4	0	3	12	0	11	0	8	0	8	99	8.65508e+06	279171	469055	0	0
	3	147	4	1	6	0	6	4	2	5	17	0	2	2	8	0	19	20	9.7605e+06	980421	521566	0	0
	4	105	0	4	3	5	2	5	14	0	15	1	1	5	5	0	0	67	8.40439e+06	630066	503064	0	0
	3	158	1	3	3	20	0	7	10	0	25	0	13	0	3	0	15	25	7.94886e+06	142145	475244	0	0
	3	107	1	4	5	6	4	4	11	2	29	0	4	0	6	0	17	173	9.05549e+06	522944	475897	0	0
	2	175	0	5	4	18	0	7	1	0	13	0	11	0	8	0	10	99	8.06539e+06	165289	463814	0	0
	0	169	2	2	0	1	4	4	10	3	15	0	3	2	6	0	19	50	9.58333e+06	908823	520628	0	0
	4	99	0	4	3	5	3	4	14	0	15	1	1	5	5	0	0	67	8.42773e+06	630379	500664	0	0
	2	175	1	3	4	18	0	7	2	0	12	0	13	0	8	0	9	97	8.03728e+06	162263	464764	0	0
	1	144	0	4	0	5	1	5	8	3	24	0	4	1	0	3	6	159	9.43912e+06	765939	491248	0	0
	1	145	0	4	1	4	1	5	8	3	23	0	4	1	0	0	6	103	9.27372e+06	749177	499732	0	0
	3	141	0	4	3	5	2	5	14	0	15	1	0	5	5	0	0	67	8.37584e+06	628080	503452	0	0
	4	81	0	4	4	5	0	5	6	0	11	1	3	1	8	0	19	170	8.35554e+06	600097	486106	0	0
	1	144	1	4	1	7	3	4	7	3	23	0	2	2	0	0	6	158	9.17809e+06	658593	486608	0	0
	2	145	0	4	3	12	1	5	7	3	23	0	4	1	0	0	6	159	9.2158e+06	345009	467390	0	0
	1	144	0	4	2	6	4	3	7	3	22	0	3	1	0	0	6	156	9.05354e+06	617625	489023	0	0
	3	142	1	3	3	20	0	7	11	0	25	0	14	0	3	0	15	25	7.94687e+06	137088	476352	0	0
	2	175	1	3	3	13	0	4	0	3	14	0	14	0	8	0	8	74	8.4565e+06	292327	474065	0	0
	4	78	0	5	5	5	0	4	5	1	8	1	3	1	8	0	17	160	8.25992e+06	195162	465493	0	0
	3	116	1	4	5	6	4	4	9	1	29	0	4	1	6	0	17	173	8.35608e+06	168186	460427	0	0
	4	94	0	5	5	5	0	5	4	0	11	1	3	1	8	0	19	86	8.24177e+06	550180	496515	0	0
	0	126	1	4	0	7	3	4	7	3	23	0	1	2	0	0	6	158	9.28241e+06	697972	493765	0	0
	3	116	0	4	5	1	5	4	14	0	14	1	4	1	1	0	4	188	8.71765e+06	898744	510179	0	0
	3	149	4	1	6	0	5	4	2	5	17	0	2	2	8	0	19	27	9.75514e+06	975404	531922	0	0
	2	176	1	4	0	20	1	4	0	3	12	0	11	0	8	0	8	97	8.65043e+06	360694	471906	0	0
	0	169	2	2	0	1	4	5	9	3	15	0	3	2	6	0	19	50	9.66715e+06	947077	516919	0	0
	3	147	4	1	6	0	5	4	2	5	17	0	2	2	8	0	19	15	9.74656e+06	970662	533991	0	0
	1	144	0	4	0	5	2	6	8	3	25	0	3	1	0	3	6	159	9.49079e+06	793206	499043	0	0
	2	144	1	4	1	7	4	4	7	3	24	0	2	2	0	0	6	158	9.20507e+06	659300	483019	0	0
	3	141	0	4	2	0	2	5	14	0	15	1	0	5	5	0	0	67	9.02044e+06	933688	553094	0	0
	4	73	1	3	5	3	0	4	5	1	9	1	4	1	8	0	18	134	8.2358e+06	236364	472700	0	0
	3	137	0	5	4	5	0	5	5	1	9	1	3	2	8	0	16	148	8.34999e+06	216540	463254	0	0
	0	156	2	2	1	3	4	4	9	3	15	0	2	2	6	0	19	65	9.44675e+06	799506	509094	0	0
	3	108	1	4	4	6	5	4	11	2	29	0	4	0	6	0	17	173	9.09816e+06	565915	478346	0	0
	1	144	0	4	2	6	2	4	7	3	22	0	4	2	0	0	6	158	9.11188e+06	619658	493217	0	0
	1	145	0	4	1	4	2	5	8	3	23	0	4	1	0	0	6	103	9.23236e+06	755620	508242	0	0
	0	184	2	2	0	1	5	4	9	3	15	0	3	2	6	0	18	44	9.55405e+06	934476	522655	0	0
	2	141	4	1	6	2	4	4	1	5	18	0	2	2	8	0	19	129	9.57737e+06	785810	495664	0	0
	3	149	4	1	6	0	6	4	2	5	17	0	2	2	8	0	19	68	9.7931e+06	997578	513676	0	0
	3	119	0	4	5	1	5	4	14	0	14	1	4	1	1	0	4	162	8.69851e+06	893062	513162	0	0
	0	154	2	2	0	1	5	4	9	3	15	0	2	2	7	0	19	49	9.53209e+06	927281	523792	0	0
	4	73	1	3	5	3	0	7	5	1	8	1	4	1	8	0	18	169	8.62926e+06	250238	471600	0	0
	1	144	1	4	0	5	2	5	8	3	24	0	4	1	0	3	6	159	9.39491e+06	772434	499709	0	0
	3	140	1	4	5	4	0	5	6	1	7	1	4	1	8	0	19	131	8.26457e+06	204138	466021	0	0
--------------------------------------------------
#Generation	No.	-->26
#Variable_vector	Fitness_vector	Constraint_violation	Overall_penalty
	1	202	2	2	5	4	0	8	6	1	16	0	14	0	6	0	5	0	8.22421e+06	175547	486282	0	0
	2	175	1	3	4	18	0	7	1	0	12	0	13	0	8	0	8	58	8.01532e+06	151069	470013	0	0
	4	78	0	5	5	5	0	5	4	0	11	1	3	1	8	0	19	145	8.31834e+06	559368	489824	0	0
	4	105	0	5	3	5	2	5	12	0	15	1	1	5	5	0	0	108	8.4355e+06	640705	498265	0	0
	2	175	0	5	2	15	0	4	0	3	13	0	13	0	8	0	9	98	8.56204e+06	303443	479845	0	0
	2	176	1	4	4	12	1	4	0	3	12	0	11	0	8	0	8	99	8.65508e+06	279171	469055	0	0
	3	147	4	1	6	0	6	4	2	5	17	0	2	2	8	0	19	20	9.7605e+06	980421	521566	0	0
	4	105	0	4	3	5	2	5	14	0	15	1	1	5	5	0	0	67	8.40439e+06	630066	503064	0	0
	3	158	1	3	3	20	0	7	10	0	25	0	13	0	3	0	15	25	7.94886e+06	142145	475244	0	0
	3	107	1	4	5	6	4	4	11	2	29	0	4	0	6	0	17	173	9.05549e+06	522944	475897	0	0
	2	175	0	5	4	18	0	7	1	0	13	0	11	0	8	0	10	99	8.06539e+06	165289	463814	0	0
	2	175	1	3	4	18	0	7	2	0	12	0	13	0	8	0	9	97	8.03728e+06	162263	464764	0	0
	1	144	0	4	0	5	1	5	8	3	24	0	4	1	0	3	6	159	9.43912e+06	765939	491248	0	0
	1	145	0	4	1	4	1	5	8	3	23	0	4	1	0	0	6	103	9.27372e+06	749177	499732	0	0
	3	141	0	4	3	5	2	5	14	0	15	1	0	5	5	0	0	67	8.37584e+06	628080	503452	0	0
	4	81	0	4	4	5	0	5	6	0	11	1	3	1	8	0	19	170	8.35554e+06	600097	486106	0	0
	2	145	0	4	3	12	1	5	7	3	23	0	4	1	0	0	6	159	9.2158e+06	345009	467390	0	0
	1	144	0	4	2	6	4	3	7	3	22	0	3	1	0	0	6	156	9.05354e+06	617625	489023	0	0
	3	142	1	3	3	20	0	7	11	0	25	0	14	0	3	0	15	25	7.94687e+06	137088	476352	0	0
	2	175	1	3	3	13	0	4	0	3	14	0	14	0	8	0	8	74	8.4565e+06	292327	474065	0	0
	4	78	0	5	5	5	0	4	5	1	8	1	3	1	8	0	17	160	8.25992e+06	195162	465493	0	0
	3	116	1	4	5	6	4	4	9	1	29	0	4	1	6	0	17	173	8.35608e+06	168186	460427	0	0
	4	94	0	5	5	5	0	5	4	0	11	1	3	1	8	0	19	86	8.24177e+06	550180	496515	0	0
	3	116	0	4	5	1	5	4	14	0	14	1	4	1	1	0	4	188	8.71765e+06	898744	510179	0	0
	3	149	4	1	6	0	5	4	2	5	17	0	2	2	8	0	19	27	9.75514e+06	975404	531922	0	0
	2	176	1	4	0	20	1	4	0	3	12	0	11	0	8	0	8	97	8.65043e+06	360694	471906	0	0
	0	169	2	2	0	1	4	5	9	3	15	0	3	2	6	0	19	50	9.66715e+06	947077	516919	0	0
	3	147	4	1	6	0	5	4	2	5	17	0	2	2	8	0	19	15	9.74656e+06	970662	533991	0	0
	3	141	0	4	2	0	2	5	14	0	15	1	0	5	5	0	0	67	9.02044e+06	933688	553094	0	0
	4	73	1	3	5	3	0	4	5	1	9	1	4	1	8	0	18	134	8.2358e+06	236364	472700	0	0
	3	137	0	5	4	5	0	5	5	1	9	1	3	2	8	0	16	148	8.34999e+06	216540	463254	0	0
	0	156	2	2	1	3	4	4	9	3	15	0	2	2	6	0	19	65	9.44675e+06	799506	509094	0	0
	3	108	1	4	4	6	5	4	11	2	29	0	4	0	6	0	17	173	9.09816e+06	565915	478346	0	0
	1	144	0	4	2	6	2	4	7	3	22	0	4	2	0	0	6	158	9.11188e+06	619658	493217	0	0
	0	184	2	2	0	1	5	4	9	3	15	0	3	2	6	0	18	44	9.55405e+06	934476	522655	0	0
	2	141	4	1	6	2	4	4	1	5	18	0	2	2	8	0	19	129	9.57737e+06	785810	495664	0	0
	3	149	4	1	6	0	6	4	2	5	17	0	2	2	8	0	19	68	9.7931e+06	997578	513676	0	0
	3	119	0	4	5	1	5	4	14	0	14	1	4	1	1	0	4	162	8.69851e+06	893062	513162	0	0
	0	154	2	2	0	1	5	4	9	3	15	0	2	2	7	0	19	49	9.53209e+06	927281	523792	0	0
	4	73	1	3	5	3	0	7	5	1	8	1	4	1	8	0	18	169	8.62926e+06	250238	471600	0	0
	1	144	1	4	0	5	2	5	8	3	24	0	4	1	0	3	6	159	9.39491e+06	772434	499709	0	0
	3	140	1	4	5	4	0	5	6	1	7	1	4	1	8	0	19	131	8.26457e+06	204138	466021	0	0
	3	119	0	5	6	3	5	4	14	0	14	1	4	2	1	0	2	149	8.58169e+06	698973	499336	0	0
	2	175	0	5	2	15	0	4	0	3	13	0	13	0	8	0	9	98	8.56204e+06	303443	479845	0	0
	1	144	1	4	0	5	2	5	7	3	24	0	4	1	0	3	6	158	9.32759e+06	772151	499127	0	0
	1	145	0	4	0	2	1	5	8	3	24	0	4	1	0	3	6	159	9.48657e+06	869318	501220	0	0
	1	144	0	5	2	8	4	3	7	3	23	0	3	1	0	0	6	155	9.05014e+06	547301	484066	0	0
	2	144	1	4	1	7	4	4	7	3	25	0	2	2	0	0	6	158	9.20507e+06	659300	483019	0	0
	1	144	1	4	1	7	3	4	7	3	23	0	2	2	0	0	6	158	9.17809e+06	658593	486608	0	0
	3	141	0	4	3	4	2	6	14	0	15	1	1	3	5	0	0	67	8.43023e+06	692072	506519	0	0
--------------------------------------------------
#Generation	No.	-->27
#Variable_vector	Fitness_vector	Constraint_violation	Overall_penalty
	1	202	2	2	5	4	0	8	6	1	16	0	14	0	6	0	5	0	8.22421e+06	175547	486282	0	0
	2	175	1	3	4	18	0	7	1	0	12	0	13	0	8	0	8	58	8.01532e+06	151069	470013	0	0
	4	78	0	5	5	5	0	5	4	0	11	1	3	1	8	0	19	145	8.31834e+06	559368	489824	0	0
	2	176	1	4	4	12	1	4	0	3	12	0	11	0	8	0	8	99	8.65508e+06	279171	469055	0	0
	3	147	4	1	6	0	6	4	2	5	17	0	2	2	8	0	19	20	9.7605e+06	980421	521566	0	0
	4	105	0	4	3	5	2	5	14	0	15	1	1	5	5	0	0	67	8.40439e+06	630066	503064	0	0
	3	158	1	3	3	20	0	7	10	0	25	0	13	0	3	0	15	25	7.94886e+06	142145	475244	0	0
	3	107	1	4	5	6	4	4	11	2	29	0	4	0	6	0	17	173	9.05549e+06	522944	475897	0	0
	2	175	0	5	4	18	0	7	1	0	13	0	11	0	8	0	10	99	8.06539e+06	165289	463814	0	0
	1	144	0	4	0	5	1	5	8	3	24	0	4	1	0	3	6	159	9.43912e+06	765939	491248	0	0
	1	145	0	4	1	4	1	5	8	3	23	0	4	1	0	0	6	103	9.27372e+06	749177	499732	0	0
	3	141	0	4	3	5	2	5	14	0	15	1	0	5	5	0	0	67	8.37584e+06	628080	503452	0	0
	4	81	0	4	4	5	0	5	6	0	11	1	3	1	8	0	19	170	8.35554e+06	600097	486106	0	0
	2	145	0	4	3	12	1	5	7	3	23	0	4	1	0	0	6	159	9.2158e+06	345009	467390	0	0
	3	142	1	3	3	20	0	7	11	0	25	0	14	0	3	0	15	25	7.94687e+06	137088	476352	0	0
	2	175	1	3	3	13	0	4	0	3	14	0	14	0	8	0	8	74	8.4565e+06	292327	474065	0	0
	4	78	0	5	5	5	0	4	5	1	8	1	3	1	8	0	17	160	8.25992e+06	195162	465493	0	0
	3	116	1	4	5	6	4	4	9	1	29	0	4	1	6	0	17	173	8.35608e+06	168186	460427	0	0
	3	116	0	4	5	1	5	4	14	0	14	1	4	1	1	0	4	188	8.71765e+06	898744	510179	0	0
	3	149	4	1	6	0	5	4	2	5	17	0	2	2	8	0	19	27	9.75514e+06	975404	531922	0	0
	2	176	1	4	0	20	1	4	0	3	12	0	11	0	8	0	8	97	8.65043e+06	360694	471906	0	0
	3	147	4	1	6	0	5	4	2	5	17	0	2	2	8	0	19	15	9.74656e+06	970662	533991	0	0
	3	141	0	4	2	0	2	5	14	0	15	1	0	5	5	0	0	67	9.02044e+06	933688	553094	0	0
	4	73	1	3	5	3	0	4	5	1	9	1	4	1	8	0	18	134	8.2358e+06	236364	472700	0	0
	3	137	0	5	4	5	0	5	5	1	9	1	3	2	8	0	16	148	8.34999e+06	216540	463254	0	0
	3	108	1	4	4	6	5	4	11	2	29	0	4	0	6	0	17	173	9.09816e+06	565915	478346	0	0
	1	144	0	4	2	6	2	4	7	3	22	0	4	2	0	0	6	158	9.11188e+06	619658	493217	0	0
	0	184	2	2	0	1	5	4	9	3	15	0	3	2	6	0	18	44	9.55405e+06	934476	522655	0	0
	3	149	4	1	6	0	6	4	2	5	17	0	2	2	8	0	19	68	9.7931e+06	997578	513676	0	0
	3	119	0	4	5	1	5	4	14	0	14	1	4	1	1	0	4	162	8.69851e+06	893062	513162	0	0
	0	154	2	2	0	1	5	4	9	3	15	0	2	2	7	0	19	49	9.53209e+06	927281	523792	0	0
	1	144	1	4	0	5	2	5	8	3	24	0	4	1	0	3	6	159	9.39491e+06	772434	499709	0	0
	3	119	0	5	6	3	5	4	14	0	14	1	4	2	1	0	2	149	8.58169e+06	698973	499336	0	0
	2	175	0	5	2	15	0	4	0	3	13	0	13	0	8	0	9	98	8.56204e+06	303443	479845	0	0
	1	145	0	4	0	2	1	5	8	3	24	0	4	1	0	3	6	159	9.48657e+06	869318	501220	0	0
	1	144	0	5	2	8	4	3	7	3	23	0	3	1	0	0	6	155	9.05014e+06	547301	484066	0	0
	2	144	1	4	1	7	4	4	7	3	25	0	2	2	0	0	6	158	9.20507e+06	659300	483019	0	0
	3	141	0	4	3	4	2	6	14	0	15	1	1	3	5	0	0	67	8.43023e+06	692072	506519	0	0
	2	145	0	4	3	12	1	5	7	3	23	0	4	1	1	0	6	158	9.21526e+06	344726	467522	0	0
	2	144	1	4	1	7	3	4	7	3	25	0	2	2	0	0	7	159	9.17527e+06	659223	486438	0	0
	4	78	0	5	5	5	0	4	4	1	8	1	3	1	8	0	17	160	8.25805e+06	209223	465804	0	0
	2	142	0	4	0	2	1	5	8	3	24	0	4	1	0	0	6	159	9.34687e+06	868724	501391	0	0
	1	125	1	4	0	7	2	5	7	3	24	0	4	1	0	3	6	158	9.29976e+06	700505	493618	0	0
	1	144	1	4	1	7	2	5	7	3	23	0	2	2	0	0	6	111	9.09813e+06	641950	494615	0	0
	1	145	0	4	1	4	2	5	8	3	23	0	4	1	0	0	7	150	9.25837e+06	768834	502046	0	0
	2	141	4	1	6	2	4	4	1	5	18	0	2	2	8	0	19	129	9.57737e+06	785810	495664	0	0
	3	141	0	4	2	4	1	5	14	0	15	1	0	5	5	0	0	67	8.62848e+06	705090	511848	0	0
	3	108	1	4	4	6	6	4	11	2	29	0	4	0	6	0	16	145	9.14903e+06	556204	478260	0	0
	0	169	2	2	0	1	4	5	8	3	15	0	3	2	6	0	19	50	9.58251e+06	947077	516754	0	0
	2	175	1	3	3	13	0	4	0	3	14	0	14	0	8	0	8	95	8.46822e+06	298384	471226	0	0
--------------------------------------------------
#Generation	No.	-->28
#Variable_vector	Fitness_vector	Constraint_violation	Overall_penalty
	1	202	2	2	5	4	0	8	6	1	16	0	14	0	6	0	5	0	8.22421e+06	175547	486282	0	0
	2	175	1	3	4	18	0	7	1	0	12	0	13	0	8	0	8	58	8.01532e+06	151069	470013	0	0
	4	78	0	5	5	5	0	5	4	0	11	1	3	1	8	0	19	145	8.31834e+06	559368	489824	0	0
	2	176	1	4	4	12	1	4	0	3	12	0	11	0	8	0	8	99	8.65508e+06	279171	469055	0	0
	3	147	4	1	6	0	6	4	2	5	17	0	2	2	8	0	19	20	9.7605e+06	980421	521566	0	0
	4	105	0	4	3	5	2	5	14	0	15	1	1	5	5	0	0	67	8.40439e+06	630066	503064	0	0
	3	158	1	3	3	20	0	7	10	0	25	0	13	0	3	0	15	25	7.94886e+06	142145	475244	0	0
	3	107	1	4	5	6	4	4	11	2	29	0	4	0	6	0	17	173	9.05549e+06	522944	475897	0	0
	1	144	0	4	0	5	1	5	8	3	24	0	4	1	0	3	6	159	9.43912e+06	765939	491248	0	0
	3	141	0	4	3	5	2	5	14	0	15	1	0	5	5	0	0	67	8.37584e+06	628080	503452	0	0
	2	145	0	4	3	12	1	5	7	3	23	0	4	1	0	0	6	159	9.2158e+06	345009	467390	0	0
	3	142	1	3	3	20	0	7	11	0	25	0	14	0	3	0	15	25	7.94687e+06	137088	476352	0	0
	2	175	1	3	3	13	0	4	0	3	14	0	14	0	8	0	8	74	8.4565e+06	292327	474065	0	0
	4	78	0	5	5	5	0	4	5	1	8	1	3	1	8	0	17	160	8.25992e+06	195162	465493	0	0
	3	116	1	4	5	6	4	4	9	1	29	0	4	1	6	0	17	173	8.35608e+06	168186	460427	0	0
	3	116	0	4	5	1	5	4	14	0	14	1	4	1	1	0	4	188	8.71765e+06	898744	510179	0	0
	3	149	4	1	6	0	5	4	2	5	17	0	2	2	8	0	19	27	9.75514e+06	975404	531922	0	0
	2	176	1	4	0	20	1	4	0	3	12	0	11	0	8	0	8	97	8.65043e+06	360694	471906	0	0
	3	147	4	1	6	0	5	4	2	5	17	0	2	2	8	0	19	15	9.74656e+06	970662	533991	0	0
	3	141	0	4	2	0	2	5	14	0	15	1	0	5	5	0	0	67	9.02044e+06	933688	553094	0	0
	4	73	1	3	5	3	0	4	5	1	9	1	4	1	8	0	18	134	8.2358e+06	236364	472700	0	0
	3	137	0	5	4	5	0	5	5	1	9	1	3	2	8	0	16	148	8.34999e+06	216540	463254	0	0
	3	108	1	4	4	6	5	4	11	2	29	0	4	0	6	0	17	173	9.09816e+06	565915	478346	0	0
	0	184	2	2	0	1	5	4	9	3	15	0	3	2	6	0	18	44	9.55405e+06	934476	522655	0	0
	3	149	4	1	6	0	6	4	2	5	17	0	2	2	8	0	19	68	9.7931e+06	997578	513676	0	0
	3	119	0	4	5	1	5	4	14	0	14	1	4	1	1	0	4	162	8.69851e+06	893062	513162	0	0
	0	154	2	2	0	1	5	4	9	3	15	0	2	2	7	0	19	49	9.53209e+06	927281	523792	0	0
	3	119	0	5	6	3	5	4	14	0	14	1	4	2	1	0	2	149	8.58169e+06	698973	499336	0	0
	2	175	0	5	2	15	0	4	0	3	13	0	13	0	8	0	9	98	8.56204e+06	303443	479845	0	0
	1	145	0	4	0	2	1	5	8	3	24	0	4	1	0	3	6	159	9.48657e+06	869318	501220	0	0
	1	144	0	5	2	8	4	3	7	3	23	0	3	1	0	0	6	155	9.05014e+06	547301	484066	0	0
	2	144	1	4	1	7	4	4	7	3	25	0	2	2	0	0	6	158	9.20507e+06	659300	483019	0	0
	3	141	0	4	3	4	2	6	14	0	15	1	1	3	5	0	0	67	8.43023e+06	692072	506519	0	0
	4	78	0	5	5	5	0	4	4	1	8	1	3	1	8	0	17	160	8.25805e+06	209223	465804	0	0
	2	142	0	4	0	2	1	5	8	3	24	0	4	1	0	0	6	159	9.34687e+06	868724	501391	0	0
	1	125	1	4	0	7	2	5	7	3	24	0	4	1	0	3	6	158	9.29976e+06	700505	493618	0	0
	2	141	4	1	6	2	4	4	1	5	18	0	2	2	8	0	19	129	9.57737e+06	785810	495664	0	0
	3	141	0	4	2	4	1	5	14	0	15	1	0	5	5	0	0	67	8.62848e+06	705090	511848	0	0
	3	108	1	4	4	6	6	4	11	2	29	0	4	0	6	0	16	145	9.14903e+06	556204	478260	0	0
	0	169	2	2	0	1	4	5	8	3	15	0	3	2	6	0	19	50	9.58251e+06	947077	516754	0	0
	2	175	1	3	3	13	0	4	0	3	14	0	14	0	8	0	8	95	8.46822e+06	298384	471226	0	0
	4	81	0	4	4	5	0	5	7	0	11	1	3	1	8	0	19	170	8.35554e+06	600097	486106	0	0
	2	144	1	4	1	7	3	4	6	3	25	0	2	2	0	0	7	159	9.09442e+06	659223	486287	0	0
	2	175	0	5	4	18	0	7	1	0	13	0	11	0	8	0	10	99	8.06539e+06	165289	463814	0	0
	2	144	1	4	0	5	2	5	7	3	25	0	2	2	0	0	7	159	9.18541e+06	772780	498961	0	0
	1	144	1	4	0	8	3	4	8	3	24	0	5	1	0	3	6	159	9.391e+06	683180	486783	0	0
	1	144	0	4	0	2	1	5	7	3	25	0	4	1	0	0	5	119	9.25609e+06	856870	505701	0	0
	2	176	1	3	0	21	1	4	0	3	12	0	11	0	8	0	8	97	8.65016e+06	340075	471223	0	0
	1	125	1	4	0	6	2	5	7	3	24	0	4	1	0	0	6	158	9.18496e+06	731601	497286	0	0
	2	144	1	4	1	8	4	4	7	3	25	0	2	2	1	1	6	158	9.26016e+06	622864	481386	0	0
--------------------------------------------------
#Generation	No.	-->29
#Variable_vector	Fitness_vector	Constraint_violation	Overall_penalty
	1	202	2	2	5	4	0	8	6	1	16	0	14	0	6	0	5	0	8.22421e+06	175547	486282	0	0
	2	175	1	3	4	18	0	7	1	0	12	0	13	0	8	0	8	58	8.01532e+06	151069	470013	0	0
	2	176	1	4	4	12	1	4	0	3	12	0	11	0	8	0	8	99	8.65508e+06	279171	469055	0	0
	3	147	4	1	6	0	6	4	2	5	17	0	2	2	8	0	19	20	9.7605e+06	980421	521566	0	0
	4	105	0	4	3	5	2	5	14	0	15	1	1	5	5	0	0	67	8.40439e+06	630066	503064	0	0
	3	158	1	3	3	20	0	7	10	0	25	0	13	0	3	0	15	25	7.94886e+06	142145	475244	0	0
	3	107	1	4	5	6	4	4	11	2	29	0	4	0	6	0	17	173	9.05549e+06	522944	475897	0	0
	3	141	0	4	3	5	2	5	14	0	15	1	0	5	5	0	0	67	8.37584e+06	628080	503452	0	0
	3	142	1	3	3	20	0	7	11	0	25	0	14	0	3	0	15	25	7.94687e+06	137088	476352	0	0
	2	175	1	3	3	13	0	4	0	3	14	0	14	0	8	0	8	74	8.4565e+06	292327	474065	0	0
	4	78	0	5	5	5	0	4	5	1	8	1	3	1	8	0	17	160	8.25992e+06	195162	465493	0	0
	3	116	1	4	5	6	4	4	9	1	29	0	4	1	6	0	17	173	8.35608e+06	168186	460427	0	0
	3	116	0	4	5	1	5	4	14	0	14	1	4	1	1	0	4	188	8.71765e+06	898744	510179	0	0
	3	149	4	1	6	0	5	4	2	5	17	0	2	2	8	0	19	27	9.75514e+06	975404	531922	0	0
	2	176	1	4	0	20	1	4	0	3	12	0	11	0	8	0	8	97	8.65043e+06	360694	471906	0	0
	3	147	4	1	6	0	5	4	2	5	17	0	2	2	8	0	19	15	9.74656e+06	970662	533991	0	0
	3	141	0	4	2	0	2	5	14	0	15	1	0	5	5	0	0	67	9.02044e+06	933688	553094	0	0
	4	73	1	3	5	3	0	4	5	1	9	1	4	1	8	0	18	134	8.2358e+06	236364	472700	0	0
	3	108	1	4	4	6	5	4	11	2	29	0	4	0	6	0	17	173	9.09816e+06	565915	478346	0	0
	3	149	4	1	6	0	6	4	2	5	17	0	2	2	8	0	19	68	9.7931e+06	997578	513676	0	0
	3	119	0	4	5	1	5	4	14	0	14	1	4	1	1	0	4	162	8.69851e+06	893062	513162	0	0
	2	175	0	5	2	15	0	4	0	3	13	0	13	0	8	0	9	98	8.56204e+06	303443	479845	0	0
	1	145	0	4	0	2	1	5	8	3	24	0	4	1	0	3	6	159	9.48657e+06	869318	501220	0	0
	1	144	0	5	2	8	4	3	7	3	23	0	3	1	0	0	6	155	9.05014e+06	547301	484066	0	0
	2	144	1	4	1	7	4	4	7	3	25	0	2	2	0	0	6	158	9.20507e+06	659300	483019	0	0
	3	141	0	4	3	4	2	6	14	0	15	1	1	3	5	0	0	67	8.43023e+06	692072	506519	0	0
	2	142	0	4	0	2	1	5	8	3	24	0	4	1	0	0	6	159	9.34687e+06	868724	501391	0	0
	1	125	1	4	0	7	2	5	7	3	24	0	4	1	0	3	6	158	9.29976e+06	700505	493618	0	0
	2	141	4	1	6	2	4	4	1	5	18	0	2	2	8	0	19	129	9.57737e+06	785810	495664	0	0
	3	141	0	4	2	4	1	5	14	0	15	1	0	5	5	0	0	67	8.62848e+06	705090	511848	0	0
	3	108	1	4	4	6	6	4	11	2	29	0	4	0	6	0	16	145	9.14903e+06	556204	478260	0	0
	2	175	1	3	3	13	0	4	0	3	14	0	14	0	8	0	8	95	8.46822e+06	298384	471226	0	0
	4	81	0	4	4	5	0	5	7	0	11	1	3	1	8	0	19	170	8.35554e+06	600097	486106	0	0
	2	144	1	4	1	7	3	4	6	3	25	0	2	2	0	0	7	159	9.09442e+06	659223	486287	0	0
	2	175	0	5	4	18	0	7	1	0	13	0	11	0	8	0	10	99	8.06539e+06	165289	463814	0	0
	1	144	0	4	0	2	1	5	7	3	25	0	4	1	0	0	5	119	9.25609e+06	856870	505701	0	0
	2	176	1	3	0	21	1	4	0	3	12	0	11	0	8	0	8	97	8.65016e+06	340075	471223	0	0
	1	125	1	4	0	6	2	5	7	3	24	0	4	1	0	0	6	158	9.18496e+06	731601	497286	0	0
	2	144	1	4	1	8	4	4	7	3	25	0	2	2	1	1	6	158	9.26016e+06	622864	481386	0	0
	0	169	2	2	0	1	4	5	8	3	15	0	3	2	6	0	19	50	9.58251e+06	947077	516754	0	0
	1	152	2	2	0	1	5	4	9	3	15	0	2	2	7	0	19	67	9.47184e+06	939969	518930	0	0
	4	78	0	5	5	1	5	4	14	0	15	1	5	1	1	0	5	194	8.75886e+06	896197	510019	0	0
	2	147	1	4	0	6	2	6	8	3	24	0	5	1	0	0	6	158	9.35764e+06	757426	495349	0	0
	4	81	0	5	5	5	0	5	4	0	11	1	3	1	8	0	19	145	8.30818e+06	561820	489194	0	0
	3	147	4	1	6	2	6	4	2	5	17	0	2	2	8	0	19	125	9.75276e+06	801390	490679	0	0
	2	145	0	4	3	12	1	5	6	3	23	0	4	1	0	0	6	159	9.13637e+06	345009	467381	0	0
	3	141	0	5	3	6	2	5	14	0	14	1	0	5	5	0	0	67	8.34253e+06	578538	499688	0	0
	1	144	1	4	0	8	3	4	8	3	24	0	5	1	0	3	6	159	9.391e+06	683180	486783	0	0
	3	147	4	1	6	0	5	4	2	5	17	0	2	2	8	0	19	111	9.81061e+06	1.00377e+06	518466	0	0
	3	141	0	4	2	0	2	5	14	0	15	1	0	5	5	0	0	67	9.02044e+06	933688	553094	0	0
--------------------------------------------------
#Generation	No.	-->30
#Variable_vector	Fitness_vector	Constraint_violation	Overall_penalty
	1	202	2	2	5	4	0	8	6	1	16	0	14	0	6	0	5	0	8.22421e+06	175547	486282	0	0
	2	175	1	3	4	18	0	7	1	0	12	0	13	0	8	0	8	58	8.01532e+06	151069	470013	0	0
	2	176	1	4	4	12	1	4	0	3	12	0	11	0	8	0	8	99	8.65508e+06	279171	469055	0	0
	3	147	4	1	6	0	6	4	2	5	17	0	2	2	8	0	19	20	9.7605e+06	980421	521566	0	0
	3	158	1	3	3	20	0	7	10	0	25	0	13	0	3	0	15	25	7.94886e+06	142145	475244	0	0
	3	107	1	4	5	6	4	4	11	2	29	0	4	0	6	0	17	173	9.05549e+06	522944	475897	0	0
	3	141	0	4	3	5	2	5	14	0	15	1	0	5	5	0	0	67	8.37584e+06	628080	503452	0	0
	3	142	1	3	3	20	0	7	11	0	25	0	14	0	3	0	15	25	7.94687e+06	137088	476352	0	0
	2	175	1	3	3	13	0	4	0	3	14	0	14	0	8	0	8	74	8.4565e+06	292327	474065	0	0
	4	78	0	5	5	5	0	4	5	1	8	1	3	1	8	0	17	160	8.25992e+06	195162	465493	0	0
	3	116	0	4	5	1	5	4	14	0	14	1	4	1	1	0	4	188	8.71765e+06	898744	510179	0	0
	3	149	4	1	6	0	5	4	2	5	17	0	2	2	8	0	19	27	9.75514e+06	975404	531922	0	0
	2	176	1	4	0	20	1	4	0	3	12	0	11	0	8	0	8	97	8.65043e+06	360694	471906	0	0
	3	147	4	1	6	0	5	4	2	5	17	0	2	2	8	0	19	15	9.74656e+06	970662	533991	0	0
	4	73	1	3	5	3	0	4	5	1	9	1	4	1	8	0	18	134	8.2358e+06	236364	472700	0	0
	3	149	4	1	6	0	6	4	2	5	17	0	2	2	8	0	19	68	9.7931e+06	997578	513676	0	0
	2	175	0	5	2	15	0	4	0	3	13	0	13	0	8	0	9	98	8.56204e+06	303443	479845	0	0
	1	145	0	4	0	2	1	5	8	3	24	0	4	1	0	3	6	159	9.48657e+06	869318	501220	0	0
	1	144	0	5	2	8	4	3	7	3	23	0	3	1	0	0	6	155	9.05014e+06	547301	484066	0	0
	2	144	1	4	1	7	4	4	7	3	25	0	2	2	0	0	6	158	9.20507e+06	659300	483019	0	0
	3	141	0	4	3	4	2	6	14	0	15	1	1	3	5	0	0	67	8.43023e+06	692072	506519	0	0
	2	142	0	4	0	2	1	5	8	3	24	0	4	1	0	0	6	159	9.34687e+06	868724	501391	0	0
	2	141	4	1	6	2	4	4	1	5	18	0	2	2	8	0	19	129	9.57737e+06	785810	495664	0	0
	3	141	0	4	2	4	1	5	14	0	15	1	0	5	5	0	0	67	8.62848e+06	705090	511848	0	0
	3	108	1	4	4	6	6	4	11	2	29	0	4	0	6	0	16	145	9.14903e+06	556204	478260	0	0
	2	175	0	5	4	18	0	7	1	0	13	0	11	0	8	0	10	99	8.06539e+06	165289	463814	0	0
	1	125	1	4	0	6	2	5	7	3	24	0	4	1	0	0	6	158	9.18496e+06	731601	497286	0	0
	2	144	1	4	1	8	4	4	7	3	25	0	2	2	1	1	6	158	9.26016e+06	622864	481386	0	0
	0	169	2	2	0	1	4	5	8	3	15	0	3	2	6	0	19	50	9.58251e+06	947077	516754	0	0
	1	152	2	2	0	1	5	4	9	3	15	0	2	2	7	0	19	67	9.47184e+06	939969	518930	0	0
	4	78	0	5	5	1	5	4	14	0	15	1	5	1	1	0	5	194	8.75886e+06	896197	510019	0	0
	2	147	1	4	0	6	2	6	8	3	24	0	5	1	0	0	6	158	9.35764e+06	757426	495349	0	0
	4	81	0	5	5	5	0	5	4	0	11	1	3	1	8	0	19	145	8.30818e+06	561820	489194	0	0
	3	147	4	1	6	2	6	4	2	5	17	0	2	2	8	0	19	125	9.75276e+06	801390	490679	0	0
	1	144	1	4	0	8	3	4	8	3	24	0	5	1	0	3	6	159	9.391e+06	683180	486783	0	0
	3	147	4	1	6	0	5	4	2	5	17	0	2	2	8	0	19	111	9.81061e+06	1.00377e+06	518466	0	0
	3	141	0	4	2	0	2	5	14	0	15	1	0	5	5	0	0	67	9.02044e+06	933688	553094	0	0
	1	145	0	4	0	2	1	5	7	3	25	0	4	1	0	0	5	119	9.2552e+06	857278	505602	0	0
	4	81	0	4	4	5	0	5	7	0	11	1	3	1	8	0	19	170	8.35554e+06	600097	486106	0	0
	3	145	0	4	3	12	1	5	6	3	23	0	4	1	0	0	6	159	9.12106e+06	346069	467054	0	0
	2	141	1	4	0	8	3	4	8	3	24	0	5	1	0	0	6	159	9.25076e+06	682636	486937	0	0
	3	141	0	4	3	4	1	5	14	0	14	1	0	4	5	0	0	67	8.53413e+06	674912	505252	0	0
	3	141	0	4	2	0	2	5	14	0	15	1	0	5	5	0	0	67	9.02044e+06	933688	553094	0	0
	1	125	1	4	0	7	2	5	7	3	24	0	4	1	0	3	6	158	9.29976e+06	700505	493618	0	0
	3	116	1	4	5	6	4	4	8	1	29	0	4	1	6	0	17	173	8.31535e+06	169928	458895	0	0
	2	117	4	1	6	1	6	4	2	5	17	0	2	2	8	0	19	74	9.78378e+06	869415	507346	0	0
	3	141	0	4	2	4	1	5	14	0	15	1	0	5	5	0	0	159	8.67497e+06	728964	500653	0	0
	4	105	0	4	3	5	2	5	14	0	15	1	1	5	5	0	0	67	8.40439e+06	630066	503064	0	0
	2	175	1	3	4	18	0	7	1	0	12	0	14	0	8	0	8	58	8.01532e+06	151069	470013	0	0
	4	74	0	4	5	3	0	4	6	1	9	1	4	1	8	0	18	134	8.25008e+06	210310	471329	0	0
--------------------------------------------------
#Generation	No.	-->31
#Variable_vector	Fitness_vector	Constraint_violation	Overall_penalty
	1	202	2	2	5	4	0	8	6	1	16	0	14	0	6	0	5	0	8.22421e+06	175547	486282	0	0
	2	175	1	3	4	18	0	7	1	0	12	0	13	0	8	0	8	58	8.01532e+06	151069	470013	0	0
	2	176	1	4	4	12	1	4	0	3	12	0	11	0	8	0	8	99	8.65508e+06	279171	469055	0	0
	3	147	4	1	6	0	6	4	2	5	17	0	2	2	8	0	19	20	9.7605e+06	980421	521566	0	0
	3	158	1	3	3	20	0	7	10	0	25	0	13	0	3	0	15	25	7.94886e+06	142145	475244	0	0
	3	107	1	4	5	6	4	4	11	2	29	0	4	0	6	0	17	173	9.05549e+06	522944	475897	0	0
	3	142	1	3	3	20	0	7	11	0	25	0	14	0	3	0	15	25	7.94687e+06	137088	476352	0	0
	2	175	1	3	3	13	0	4	0	3	14	0	14	0	8	0	8	74	8.4565e+06	292327	474065	0	0
	4	78	0	5	5	5	0	4	5	1	8	1	3	1	8	0	17	160	8.25992e+06	195162	465493	0	0
	3	116	0	4	5	1	5	4	14	0	14	1	4	1	1	0	4	188	8.71765e+06	898744	510179	0	0
	3	149	4	1	6	0	5	4	2	5	17	0	2	2	8	0	19	27	9.75514e+06	975404	531922	0	0
	2	176	1	4	0	20	1	4	0	3	12	0	11	0	8	0	8	97	8.65043e+06	360694	471906	0	0
	3	147	4	1	6	0	5	4	2	5	17	0	2	2	8	0	19	15	9.74656e+06	970662	533991	0	0
	4	73	1	3	5	3	0	4	5	1	9	1	4	1	8	0	18	134	8.2358e+06	236364	472700	0	0
	3	149	4	1	6	0	6	4	2	5	17	0	2	2	8	0	19	68	9.7931e+06	997578	513676	0	0
	2	175	0	5	2	15	0	4	0	3	13	0	13	0	8	0	9	98	8.56204e+06	303443	479845	0	0
	1	145	0	4	0	2	1	5	8	3	24	0	4	1	0	3	6	159	9.48657e+06	869318	501220	0	0
	1	144	0	5	2	8	4	3	7	3	23	0	3	1	0	0	6	155	9.05014e+06	547301	484066	0	0
	2	144	1	4	1	7	4	4	7	3	25	0	2	2	0	0	6	158	9.20507e+06	659300	483019	0	0
	3	141	0	4	3	4	2	6	14	0	15	1	1	3	5	0	0	67	8.43023e+06	692072	506519	0	0
	2	142	0	4	0	2	1	5	8	3	24	0	4	1	0	0	6	159	9.34687e+06	868724	501391	0	0
	2	141	4	1	6	2	4	4	1	5	18	0	2	2	8	0	19	129	9.57737e+06	785810	495664	0	0
	2	175	0	5	4	18	0	7	1	0	13	0	11	0	8	0	10	99	8.06539e+06	165289	463814	0	0
	1	125	1	4	0	6	2	5	7	3	24	0	4	1	0	0	6	158	9.18496e+06	731601	497286	0	0
	2	144	1	4	1	8	4	4	7	3	25	0	2	2	1	1	6	158	9.26016e+06	622864	481386	0	0
	0	169	2	2	0	1	4	5	8	3	15	0	3	2	6	0	19	50	9.58251e+06	947077	516754	0	0
	1	152	2	2	0	1	5	4	9	3	15	0	2	2	7	0	19	67	9.47184e+06	939969	518930	0	0
	4	78	0	5	5	1	5	4	14	0	15	1	5	1	1	0	5	194	8.75886e+06	896197	510019	0	0
	2	147	1	4	0	6	2	6	8	3	24	0	5	1	0	0	6	158	9.35764e+06	757426	495349	0	0
	4	81	0	5	5	5	0	5	4	0	11	1	3	1	8	0	19	145	8.30818e+06	561820	489194	0	0
	3	147	4	1	6	2	6	4	2	5	17	0	2	2	8	0	19	125	9.75276e+06	801390	490679	0	0
	1	144	1	4	0	8	3	4	8	3	24	0	5	1	0	3	6	159	9.391e+06	683180	486783	0	0
	3	147	4	1	6	0	5	4	2	5	17	0	2	2	8	0	19	111	9.81061e+06	1.00377e+06	518466	0	0
	3	141	0	4	2	0	2	5	14	0	15	1	0	5	5	0	0	67	9.02044e+06	933688	553094	0	0
	1	145	0	4	0	2	1	5	7	3	25	0	4	1	0	0	5	119	9.2552e+06	857278	505602	0	0
	3	145	0	4	3	12	1	5	6	3	23	0	4	1	0	0	6	159	9.12106e+06	346069	467054	0	0
	2	141	1	4	0	8	3	4	8	3	24	0	5	1	0	0	6	159	9.25076e+06	682636	486937	0	0
	3	116	1	4	5	6	4	4	8	1	29	0	4	1	6	0	17	173	8.31535e+06	169928	458895	0	0
	2	117	4	1	6	1	6	4	2	5	17	0	2	2	8	0	19	74	9.78378e+06	869415	507346	0	0
	3	141	0	4	2	4	1	5	14	0	15	1	0	5	5	0	0	159	8.67497e+06	728964	500653	0	0
	2	175	1	3	4	18	0	7	1	0	12	0	14	0	8	0	8	58	8.01532e+06	151069	470013	0	0
	4	74	0	4	5	3	0	4	6	1	9	1	4	1	8	0	18	134	8.25008e+06	210310	471329	0	0
	1	144	1	4	0	4	3	4	8	3	24	0	4	1	0	0	6	159	9.31664e+06	816139	500039	0	0
	3	141	4	1	6	0	5	4	2	5	18	0	2	2	8	0	18	75	9.78708e+06	988868	524939	0	0
	3	147	0	4	3	5	2	5	14	0	14	1	1	3	5	0	1	114	8.36484e+06	643023	497377	0	0
	3	147	4	1	4	2	6	4	2	5	17	0	2	2	8	0	19	110	9.73427e+06	827816	492272	0	0
	4	72	1	3	5	3	0	4	5	1	8	1	4	1	8	0	18	135	8.23234e+06	235714	472823	0	0
	4	82	0	4	4	5	0	5	7	0	11	1	3	1	8	0	18	172	8.35191e+06	600610	486027	0	0
	3	136	0	4	5	3	5	4	14	0	14	1	4	1	1	0	4	149	8.47986e+06	721994	495564	0	0
	3	141	0	4	3	0	2	5	14	0	15	1	0	5	5	0	0	70	9.02196e+06	934467	552729	0	0
--------------------------------------------------
#Generation	No.	-->32
#Variable_vector	Fitness_vector	Constraint_violation	Overall_penalty
	1	202	2	2	5	4	0	8	6	1	16	0	14	0	6	0	5	0	8.22421e+06	175547	486282	0	0
	2	175	1	3	4	18	0	7	1	0	12	0	13	0	8	0	8	58	8.01532e+06	151069	470013	0	0
	2	176	1	4	4	12	1	4	0	3	12	0	11	0	8	0	8	99	8.65508e+06	279171	469055	0	0
	3	158	1	3	3	20	0	7	10	0	25	0	13	0	3	0	15	25	7.94886e+06	142145	475244	0	0
	3	142	1	3	3	20	0	7	11	0	25	0	14	0	3	0	15	25	7.94687e+06	137088	476352	0	0
	2	175	1	3	3	13	0	4	0	3	14	0	14	0	8	0	8	74	8.4565e+06	292327	474065	0	0
	4	78	0	5	5	5	0	4	5	1	8	1	3	1	8	0	17	160	8.25992e+06	195162	465493	0	0
	3	116	0	4	5	1	5	4	14	0	14	1	4	1	1	0	4	188	8.71765e+06	898744	510179	0	0
	2	176	1	4	0	20	1	4	0	3	12	0	11	0	8	0	8	97	8.65043e+06	360694	471906	0	0
	4	73	1	3	5	3	0	4	5	1	9	1	4	1	8	0	18	134	8.2358e+06	236364	472700	0	0
	1	145	0	4	0	2	1	5	8	3	24	0	4	1	0	3	6	159	9.48657e+06	869318	501220	0	0
	1	144	0	5	2	8	4	3	7	3	23	0	3	1	0	0	6	155	9.05014e+06	547301	484066	0	0
	3	141	0	4	3	4	2	6	14	0	15	1	1	3	5	0	0	67	8.43023e+06	692072	506519	0	0
	2	141	4	1	6	2	4	4	1	5	18	0	2	2	8	0	19	129	9.57737e+06	785810	495664	0	0
	2	175	0	5	4	18	0	7	1	0	13	0	11	0	8	0	10	99	8.06539e+06	165289	463814	0	0
	1	125	1	4	0	6	2	5	7	3	24	0	4	1	0	0	6	158	9.18496e+06	731601	497286	0	0
	2	144	1	4	1	8	4	4	7	3	25	0	2	2	1	1	6	158	9.26016e+06	622864	481386	0	0
	4	78	0	5	5	1	5	4	14	0	15	1	5	1	1	0	5	194	8.75886e+06	896197	510019	0	0
	2	147	1	4	0	6	2	6	8	3	24	0	5	1	0	0	6	158	9.35764e+06	757426	495349	0	0
	4	81	0	5	5	5	0	5	4	0	11	1	3	1	8	0	19	145	8.30818e+06	561820	489194	0	0
	3	147	4	1	6	2	6	4	2	5	17	0	2	2	8	0	19	125	9.75276e+06	801390	490679	0	0
	1	144	1	4	0	8	3	4	8	3	24	0	5	1	0	3	6	159	9.391e+06	683180	486783	0	0
	3	147	4	1	6	0	5	4	2	5	17	0	2	2	8	0	19	111	9.81061e+06	1.00377e+06	518466	0	0
	3	141	0	4	2	0	2	5	14	0	15	1	0	5	5	0	0	67	9.02044e+06	933688	553094	0	0
	3	145	0	4	3	12	1	5	6	3	23	0	4	1	0	0	6	159	9.12106e+06	346069	467054	0	0
	3	116	1	4	5	6	4	4	8	1	29	0	4	1	6	0	17	173	8.31535e+06	169928	458895	0	0
	3	141	0	4	2	4	1	5	14	0	15	1	0	5	5	0	0	159	8.67497e+06	728964	500653	0	0
	2	175	1	3	4	18	0	7	1	0	12	0	14	0	8	0	8	58	8.01532e+06	151069	470013	0	0
	4	74	0	4	5	3	0	4	6	1	9	1	4	1	8	0	18	134	8.25008e+06	210310	471329	0	0
	1	144	1	4	0	4	3	4	8	3	24	0	4	1	0	0	6	159	9.31664e+06	816139	500039	0	0
	4	72	1	3	5	3	0	4	5	1	8	1	4	1	8	0	18	135	8.23234e+06	235714	472823	0	0
	3	136	0	4	5	3	5	4	14	0	14	1	4	1	1	0	4	149	8.47986e+06	721994	495564	0	0
	3	141	0	4	3	0	2	5	14	0	15	1	0	5	5	0	0	70	9.02196e+06	934467	552729	0	0
	3	107	1	4	5	6	4	4	11	2	29	0	4	0	6	0	17	173	9.05549e+06	522944	475897	0	0
	2	146	4	1	6	3	5	4	2	5	17	0	2	2	8	0	19	130	9.69874e+06	713518	492733	0	0
	3	141	0	4	4	4	2	6	14	0	15	1	1	3	5	0	1	83	8.42393e+06	664271	501415	0	0
	3	147	4	1	6	0	5	4	2	5	17	0	2	2	8	0	19	113	9.81194e+06	1.00446e+06	518143	0	0
	2	147	1	4	0	6	2	6	8	3	24	0	5	1	0	0	5	159	9.35679e+06	756729	495676	0	0
	2	147	1	4	0	6	2	6	8	3	24	0	5	1	0	0	5	83	9.3159e+06	735714	505531	0	0
	4	82	0	4	4	5	0	5	7	0	11	1	3	1	8	0	18	172	8.35191e+06	600610	486027	0	0
	3	147	0	4	3	5	2	5	14	0	14	1	1	3	5	0	1	114	8.36484e+06	643023	497377	0	0
	2	141	4	1	6	1	6	4	2	5	17	0	2	2	8	0	19	123	9.78978e+06	896906	496891	0	0
	3	149	4	1	6	1	6	4	2	5	17	0	2	2	8	0	19	77	9.74274e+06	884802	503397	0	0
	2	144	1	4	0	7	4	4	7	3	26	0	2	2	0	0	5	151	9.21108e+06	711520	486784	0	0
	2	141	0	5	2	8	5	3	7	3	23	0	3	1	0	0	6	155	9.07477e+06	555907	485639	0	0
	1	145	0	4	0	2	1	5	7	3	25	0	4	1	0	0	4	95	9.24218e+06	850668	508702	0	0
	4	81	1	4	5	6	0	7	7	0	11	1	3	1	8	0	18	172	8.40561e+06	526610	478861	0	0
	1	145	0	4	0	2	1	5	8	3	24	0	4	1	0	2	6	159	9.44103e+06	869318	501222	0	0
	3	147	0	4	3	5	2	5	14	0	14	1	1	3	5	0	0	38	8.3252e+06	622652	506930	0	0
	3	147	4	1	6	0	6	4	2	4	17	0	2	2	8	0	19	79	9.44519e+06	1.00077e+06	510175	0	0
--------------------------------------------------
#Generation	No.	-->33
#Variable_vector	Fitness_vector	Constraint_violation	Overall_penalty
	2	175	1	3	4	18	0	7	1	0	12	0	13	0	8	0	8	58	8.01532e+06	151069	470013	0	0
	2	176	1	4	4	12	1	4	0	3	12	0	11	0	8	0	8	99	8.65508e+06	279171	469055	0	0
	3	158	1	3	3	20	0	7	10	0	25	0	13	0	3	0	15	25	7.94886e+06	142145	475244	0	0
	3	142	1	3	3	20	0	7	11	0	25	0	14	0	3	0	15	25	7.94687e+06	137088	476352	0	0
	2	175	1	3	3	13	0	4	0	3	14	0	14	0	8	0	8	74	8.4565e+06	292327	474065	0	0
	4	78	0	5	5	5	0	4	5	1	8	1	3	1	8	0	17	160	8.25992e+06	195162	465493	0	0
	3	116	0	4	5	1	5	4	14	0	14	1	4	1	1	0	4	188	8.71765e+06	898744	510179	0	0
	2	176	1	4	0	20	1	4	0	3	12	0	11	0	8	0	8	97	8.65043e+06	360694	471906	0	0
	1	145	0	4	0	2	1	5	8	3	24	0	4	1	0	3	6	159	9.48657e+06	869318	501220	0	0
	1	144	0	5	2	8	4	3	7	3	23	0	3	1	0	0	6	155	9.05014e+06	547301	484066	0	0
	3	141	0	4	3	4	2	6	14	0	15	1	1	3	5	0	0	67	8.43023e+06	692072	506519	0	0
	2	141	4	1	6	2	4	4	1	5	18	0	2	2	8	0	19	129	9.57737e+06	785810	495664	0	0
	2	175	0	5	4	18	0	7	1	0	13	0	11	0	8	0	10	99	8.06539e+06	165289	463814	0	0
	1	125	1	4	0	6	2	5	7	3	24	0	4	1	0	0	6	158	9.18496e+06	731601	497286	0	0
	2	144	1	4	1	8	4	4	7	3	25	0	2	2	1	1	6	158	9.26016e+06	622864	481386	0	0
	2	147	1	4	0	6	2	6	8	3	24	0	5	1	0	0	6	158	9.35764e+06	757426	495349	0	0
	4	81	0	5	5	5	0	5	4	0	11	1	3	1	8	0	19	145	8.30818e+06	561820	489194	0	0
	3	147	4	1	6	2	6	4	2	5	17	0	2	2	8	0	19	125	9.75276e+06	801390	490679	0	0
	3	147	4	1	6	0	5	4	2	5	17	0	2	2	8	0	19	111	9.81061e+06	1.00377e+06	518466	0	0
	3	141	0	4	2	0	2	5	14	0	15	1	0	5	5	0	0	67	9.02044e+06	933688	553094	0	0
	3	145	0	4	3	12	1	5	6	3	23	0	4	1	0	0	6	159	9.12106e+06	346069	467054	0	0
	3	116	1	4	5	6	4	4	8	1	29	0	4	1	6	0	17	173	8.31535e+06	169928	458895	0	0
	3	141	0	4	2	4	1	5	14	0	15	1	0	5	5	0	0	159	8.67497e+06	728964	500653	0	0
	4	74	0	4	5	3	0	4	6	1	9	1	4	1	8	0	18	134	8.25008e+06	210310	471329	0	0
	3	136	0	4	5	3	5	4	14	0	14	1	4	1	1	0	4	149	8.47986e+06	721994	495564	0	0
	3	141	0	4	3	0	2	5	14	0	15	1	0	5	5	0	0	70	9.02196e+06	934467	552729	0	0
	2	146	4	1	6	3	5	4	2	5	17	0	2	2	8	0	19	130	9.69874e+06	713518	492733	0	0
	3	141	0	4	4	4	2	6	14	0	15	1	1	3	5	0	1	83	8.42393e+06	664271	501415	0	0
	3	147	4	1	6	0	5	4	2	5	17	0	2	2	8	0	19	113	9.81194e+06	1.00446e+06	518143	0	0
	2	147	1	4	0	6	2	6	8	3	24	0	5	1	0	0	5	159	9.35679e+06	756729	495676	0	0
	4	82	0	4	4	5	0	5	7	0	11	1	3	1	8	0	18	172	8.35191e+06	600610	486027	0	0
	3	147	0	4	3	5	2	5	14	0	14	1	1	3	5	0	1	114	8.36484e+06	643023	497377	0	0
	2	141	4	1	6	1	6	4	2	5	17	0	2	2	8	0	19	123	9.78978e+06	896906	496891	0	0
	3	149	4	1	6	1	6	4	2	5	17	0	2	2	8	0	19	77	9.74274e+06	884802	503397	0	0
	2	144	1	4	0	7	4	4	7	3	26	0	2	2	0	0	5	151	9.21108e+06	711520	486784	0	0
	2	141	0	5	2	8	5	3	7	3	23	0	3	1	0	0	6	155	9.07477e+06	555907	485639	0	0
	1	145	0	4	0	2	1	5	7	3	25	0	4	1	0	0	4	95	9.24218e+06	850668	508702	0	0
	4	81	1	4	5	6	0	7	7	0	11	1	3	1	8	0	18	172	8.40561e+06	526610	478861	0	0
	1	145	0	4	0	2	1	5	8	3	24	0	4	1	0	2	6	159	9.44103e+06	869318	501222	0	0
	3	147	4	1	6	0	6	4	2	4	17	0	2	2	8	0	19	79	9.44519e+06	1.00077e+06	510175	0	0
	2	147	0	4	3	5	2	6	14	0	14	1	1	3	5	0	1	160	8.45433e+06	662200	490122	0	0
	4	76	1	3	5	3	0	4	5	1	8	1	4	1	8	0	18	134	8.21805e+06	238873	472147	0	0
	3	107	1	4	5	6	4	4	10	2	29	0	4	0	6	0	17	173	8.9388e+06	522944	475814	0	0
	2	144	1	4	0	4	3	4	8	3	24	0	5	1	0	0	6	159	9.32146e+06	816563	499966	0	0
	3	147	4	1	6	0	6	4	2	5	18	0	2	2	8	0	19	121	9.82789e+06	1.01525e+06	505233	0	0
	4	81	0	4	5	1	5	4	14	0	15	1	5	1	1	0	5	194	8.73616e+06	898648	509096	0	0
	2	146	4	1	6	3	5	4	2	5	17	0	2	2	8	0	19	130	9.69874e+06	713518	492733	0	0
	1	144	1	4	0	4	3	4	7	3	24	0	4	1	0	0	6	159	9.25039e+06	816139	499376	0	0
	2	175	0	4	4	18	0	7	1	0	13	0	11	0	8	0	9	59	8.03006e+06	151325	470212	0	0
	2	175	1	4	4	18	0	7	1	0	12	0	14	0	8	0	9	106	8.05381e+06	164854	463730	0	0
--------------------------------------------------
#Generation	No.	-->34
#Variable_vector	Fitness_vector	Constraint_violation	Overall_penalty
	2	175	1	3	4	18	0	7	1	0	12	0	13	0	8	0	8	58	8.01532e+06	151069	470013	0	0
	2	176	1	4	4	12	1	4	0	3	12	0	11	0	8	0	8	99	8.65508e+06	279171	469055	0	0
	3	158	1	3	3	20	0	7	10	0	25	0	13	0	3	0	15	25	7.94886e+06	142145	475244	0	0
	3	142	1	3	3	20	0	7	11	0	25	0	14	0	3	0	15	25	7.94687e+06	137088	476352	0	0
	2	175	1	3	3	13	0	4	0	3	14	0	14	0	8	0	8	74	8.4565e+06	292327	474065	0	0
	4	78	0	5	5	5	0	4	5	1	8	1	3	1	8	0	17	160	8.25992e+06	195162	465493	0	0
	2	176	1	4	0	20	1	4	0	3	12	0	11	0	8	0	8	97	8.65043e+06	360694	471906	0	0
	1	145	0	4	0	2	1	5	8	3	24	0	4	1	0	3	6	159	9.48657e+06	869318	501220	0	0
	1	144	0	5	2	8	4	3	7	3	23	0	3	1	0	0	6	155	9.05014e+06	547301	484066	0	0
	3	141	0	4	3	4	2	6	14	0	15	1	1	3	5	0	0	67	8.43023e+06	692072	506519	0	0
	2	141	4	1	6	2	4	4	1	5	18	0	2	2	8	0	19	129	9.57737e+06	785810	495664	0	0
	2	175	0	5	4	18	0	7	1	0	13	0	11	0	8	0	10	99	8.06539e+06	165289	463814	0	0
	1	125	1	4	0	6	2	5	7	3	24	0	4	1	0	0	6	158	9.18496e+06	731601	497286	0	0
	2	144	1	4	1	8	4	4	7	3	25	0	2	2	1	1	6	158	9.26016e+06	622864	481386	0	0
	2	147	1	4	0	6	2	6	8	3	24	0	5	1	0	0	6	158	9.35764e+06	757426	495349	0	0
	4	81	0	5	5	5	0	5	4	0	11	1	3	1	8	0	19	145	8.30818e+06	561820	489194	0	0
	3	147	4	1	6	2	6	4	2	5	17	0	2	2	8	0	19	125	9.75276e+06	801390	490679	0	0
	3	147	4	1	6	0	5	4	2	5	17	0	2	2	8	0	19	111	9.81061e+06	1.00377e+06	518466	0	0
	3	141	0	4	2	0	2	5	14	0	15	1	0	5	5	0	0	67	9.02044e+06	933688	553094	0	0
	3	145	0	4	3	12	1	5	6	3	23	0	4	1	0	0	6	159	9.12106e+06	346069	467054	0	0
	3	116	1	4	5	6	4	4	8	1	29	0	4	1	6	0	17	173	8.31535e+06	169928	458895	0	0
	3	141	0	4	2	4	1	5	14	0	15	1	0	5	5	0	0	159	8.67497e+06	728964	500653	0	0
	4	74	0	4	5	3	0	4	6	1	9	1	4	1	8	0	18	134	8.25008e+06	210310	471329	0	0
	3	136	0	4	5	3	5	4	14	0	14	1	4	1	1	0	4	149	8.47986e+06	721994	495564	0	0
	3	141	0	4	3	0	2	5	14	0	15	1	0	5	5	0	0	70	9.02196e+06	934467	552729	0	0
	3	141	0	4	4	4	2	6	14	0	15	1	1	3	5	0	1	83	8.42393e+06	664271	501415	0	0
	3	147	4	1	6	0	5	4	2	5	17	0	2	2	8	0	19	113	9.81194e+06	1.00446e+06	518143	0	0
	4	82	0	4	4	5	0	5	7	0	11	1	3	1	8	0	18	172	8.35191e+06	600610	486027	0	0
	3	147	0	4	3	5	2	5	14	0	14	1	1	3	5	0	1	114	8.36484e+06	643023	497377	0	0
	2	141	4	1	6	1	6	4	2	5	17	0	2	2	8	0	19	123	9.78978e+06	896906	496891	0	0
	1	145	0	4	0	2	1	5	7	3	25	0	4	1	0	0	4	95	9.24218e+06	850668	508702	0	0
	4	81	1	4	5	6	0	7	7	0	11	1	3	1	8	0	18	172	8.40561e+06	526610	478861	0	0
	3	147	4	1	6	0	6	4	2	4	17	0	2	2	8	0	19	79	9.44519e+06	1.00077e+06	510175	0	0
	2	147	0	4	3	5	2	6	14	0	14	1	1	3	5	0	1	160	8.45433e+06	662200	490122	0	0
	4	76	1	3	5	3	0	4	5	1	8	1	4	1	8	0	18	134	8.21805e+06	238873	472147	0	0
	3	107	1	4	5	6	4	4	10	2	29	0	4	0	6	0	17	173	8.9388e+06	522944	475814	0	0
	2	144	1	4	0	4	3	4	8	3	24	0	5	1	0	0	6	159	9.32146e+06	816563	499966	0	0
	3	147	4	1	6	0	6	4	2	5	18	0	2	2	8	0	19	121	9.82789e+06	1.01525e+06	505233	0	0
	4	81	0	4	5	1	5	4	14	0	15	1	5	1	1	0	5	194	8.73616e+06	898648	509096	0	0
	1	144	1	4	0	4	3	4	7	3	24	0	4	1	0	0	6	159	9.25039e+06	816139	499376	0	0
	2	175	1	4	4	18	0	7	1	0	12	0	14	0	8	0	9	106	8.05381e+06	164854	463730	0	0
	3	121	0	4	5	1	5	4	14	0	14	1	4	1	1	0	4	188	8.70915e+06	901226	509538	0	0
	2	139	1	4	0	6	1	5	7	3	24	0	4	1	0	0	6	158	9.21127e+06	732481	487457	0	0
	4	82	0	4	5	5	0	5	7	0	11	1	3	1	8	0	18	172	8.31236e+06	570955	484780	0	0
	4	82	1	3	3	5	1	5	7	1	11	1	3	1	8	0	17	169	8.55138e+06	194994	460332	0	0
	3	147	4	1	6	1	6	4	2	4	17	0	2	2	8	0	19	79	9.39692e+06	884888	502144	0	0
	2	149	0	4	0	2	2	6	8	3	24	0	5	1	0	3	6	149	9.56174e+06	915836	509911	0	0
	2	176	1	4	0	20	1	4	0	3	12	0	12	0	8	0	8	97	8.65043e+06	360694	471906	0	0
	4	83	0	4	4	5	0	5	8	0	11	1	3	1	8	0	17	134	8.32238e+06	588285	491956	0	0
	2	147	1	4	0	4	3	4	8	3	24	0	5	1	1	1	4	161	9.37296e+06	817326	499881	0	0
--------------------------------------------------
#Generation	No.	-->35
#Variable_vector	Fitness_vector	Constraint_violation	Overall_penalty
	2	175	1	3	4	18	0	7	1	0	12	0	13	0	8	0	8	58	8.01532e+06	151069	470013	0	0
	2	176	1	4	4	12	1	4	0	3	12	0	11	0	8	0	8	99	8.65508e+06	279171	469055	0	0
	3	158	1	3	3	20	0	7	10	0	25	0	13	0	3	0	15	25	7.94886e+06	142145	475244	0	0
	2	175	1	3	3	13	0	4	0	3	14	0	14	0	8	0	8	74	8.4565e+06	292327	474065	0	0
	4	78	0	5	5	5	0	4	5	1	8	1	3	1	8	0	17	160	8.25992e+06	195162	465493	0	0
	2	176	1	4	0	20	1	4	0	3	12	0	11	0	8	0	8	97	8.65043e+06	360694	471906	0	0
	1	145	0	4	0	2	1	5	8	3	24	0	4	1	0	3	6	159	9.48657e+06	869318	501220	0	0
	1	144	0	5	2	8	4	3	7	3	23	0	3	1	0	0	6	155	9.05014e+06	547301	484066	0	0
	3	141	0	4	3	4	2	6	14	0	15	1	1	3	5	0	0	67	8.43023e+06	692072	506519	0	0
	2	141	4	1	6	2	4	4	1	5	18	0	2	2	8	0	19	129	9.57737e+06	785810	495664	0	0
	2	175	0	5	4	18	0	7	1	0	13	0	11	0	8	0	10	99	8.06539e+06	165289	463814	0	0
	2	144	1	4	1	8	4	4	7	3	25	0	2	2	1	1	6	158	9.26016e+06	622864	481386	0	0
	2	147	1	4	0	6	2	6	8	3	24	0	5	1	0	0	6	158	9.35764e+06	757426	495349	0	0
	4	81	0	5	5	5	0	5	4	0	11	1	3	1	8	0	19	145	8.30818e+06	561820	489194	0	0
	3	147	4	1	6	2	6	4	2	5	17	0	2	2	8	0	19	125	9.75276e+06	801390	490679	0	0
	3	147	4	1	6	0	5	4	2	5	17	0	2	2	8	0	19	111	9.81061e+06	1.00377e+06	518466	0	0
	3	141	0	4	2	0	2	5	14	0	15	1	0	5	5	0	0	67	9.02044e+06	933688	553094	0	0
	3	145	0	4	3	12	1	5	6	3	23	0	4	1	0	0	6	159	9.12106e+06	346069	467054	0	0
	3	116	1	4	5	6	4	4	8	1	29	0	4	1	6	0	17	173	8.31535e+06	169928	458895	0	0
	4	74	0	4	5	3	0	4	6	1	9	1	4	1	8	0	18	134	8.25008e+06	210310	471329	0	0
	3	136	0	4	5	3	5	4	14	0	14	1	4	1	1	0	4	149	8.47986e+06	721994	495564	0	0
	3	141	0	4	3	0	2	5	14	0	15	1	0	5	5	0	0	70	9.02196e+06	934467	552729	0	0
	3	141	0	4	4	4	2	6	14	0	15	1	1	3	5	0	1	83	8.42393e+06	664271	501415	0	0
	3	147	4	1	6	0	5	4	2	5	17	0	2	2	8	0	19	113	9.81194e+06	1.00446e+06	518143	0	0
	4	82	0	4	4	5	0	5	7	0	11	1	3	1	8	0	18	172	8.35191e+06	600610	486027	0	0
	3	147	0	4	3	5	2	5	14	0	14	1	1	3	5	0	1	114	8.36484e+06	643023	497377	0	0
	1	145	0	4	0	2	1	5	7	3	25	0	4	1	0	0	4	95	9.24218e+06	850668	508702	0	0
	4	81	1	4	5	6	0	7	7	0	11	1	3	1	8	0	18	172	8.40561e+06	526610	478861	0	0
	3	147	4	1	6	0	6	4	2	4	17	0	2	2	8	0	19	79	9.44519e+06	1.00077e+06	510175	0	0
	4	76	1	3	5	3	0	4	5	1	8	1	4	1	8	0	18	134	8.21805e+06	238873	472147	0	0
	3	107	1	4	5	6	4	4	10	2	29	0	4	0	6	0	17	173	8.9388e+06	522944	475814	0	0
	3	147	4	1	6	0	6	4	2	5	18	0	2	2	8	0	19	121	9.82789e+06	1.01525e+06	505233	0	0
	4	81	0	4	5	1	5	4	14	0	15	1	5	1	1	0	5	194	8.73616e+06	898648	509096	0	0
	3	121	0	4	5	1	5	4	14	0	14	1	4	1	1	0	4	188	8.70915e+06	901226	509538	0	0
	2	139	1	4	0	6	1	5	7	3	24	0	4	1	0	0	6	158	9.21127e+06	732481	487457	0	0
	4	82	0	4	5	5	0	5	7	0	11	1	3	1	8	0	18	172	8.31236e+06	570955	484780	0	0
	4	82	1	3	3	5	1	5	7	1	11	1	3	1	8	0	17	169	8.55138e+06	194994	460332	0	0
	3	147	4	1	6	1	6	4	2	4	17	0	2	2	8	0	19	79	9.39692e+06	884888	502144	0	0
	2	176	1	4	0	20	1	4	0	3	12	0	12	0	8	0	8	97	8.65043e+06	360694	471906	0	0
	4	83	0	4	4	5	0	5	8	0	11	1	3	1	8	0	17	134	8.32238e+06	588285	491956	0	0
	3	139	1	4	0	3	1	5	7	3	24	0	4	1	0	0	6	151	9.23801e+06	830585	497572	0	0
	2	139	1	4	1	5	1	5	7	3	24	0	4	1	1	0	6	149	9.20494e+06	720653	489214	0	0
	4	78	1	4	5	5	0	6	5	1	7	1	3	1	8	0	17	160	8.45304e+06	195939	466604	0	0
	1	145	0	4	2	6	4	3	7	3	24	0	3	1	0	0	6	155	9.05208e+06	617749	489056	0	0
	3	141	0	4	2	4	1	5	14	0	15	1	0	5	5	0	0	159	8.67497e+06	728964	500653	0	0
	3	145	0	4	3	12	1	5	6	3	24	0	4	1	0	0	7	160	9.12193e+06	346275	466959	0	0
	3	145	1	3	3	20	0	7	10	0	25	0	13	0	3	0	15	25	7.94664e+06	138122	476131	0	0
	3	142	4	1	6	1	6	4	2	4	18	0	2	2	8	0	19	82	9.40008e+06	884168	502048	0	0
	1	152	1	4	0	2	2	6	8	3	24	0	5	1	0	3	6	149	9.56132e+06	916446	509585	0	0
	1	142	1	4	1	8	1	5	7	3	25	0	4	1	0	0	6	158	9.17786e+06	617081	479365	0	0
--------------------------------------------------
#Generation	No.	-->36
#Variable_vector	Fitness_vector	Constraint_violation	Overall_penalty
	2	175	1	3	4	18	0	7	1	0	12	0	13	0	8	0	8	58	8.01532e+06	151069	470013	0	0
	2	176	1	4	4	12	1	4	0	3	12	0	11	0	8	0	8	99	8.65508e+06	279171	469055	0	0
	4	78	0	5	5	5	0	4	5	1	8	1	3	1	8	0	17	160	8.25992e+06	195162	465493	0	0
	1	144	0	5	2	8	4	3	7	3	23	0	3	1	0	0	6	155	9.05014e+06	547301	484066	0	0
	3	141	0	4	3	4	2	6	14	0	15	1	1	3	5	0	0	67	8.43023e+06	692072	506519	0	0
	2	141	4	1	6	2	4	4	1	5	18	0	2	2	8	0	19	129	9.57737e+06	785810	495664	0	0
	2	175	0	5	4	18	0	7	1	0	13	0	11	0	8	0	10	99	8.06539e+06	165289	463814	0	0
	2	144	1	4	1	8	4	4	7	3	25	0	2	2	1	1	6	158	9.26016e+06	622864	481386	0	0
	2	147	1	4	0	6	2	6	8	3	24	0	5	1	0	0	6	158	9.35764e+06	757426	495349	0	0
	4	81	0	5	5	5	0	5	4	0	11	1	3	1	8	0	19	145	8.30818e+06	561820	489194	0	0
	3	147	4	1	6	2	6	4	2	5	17	0	2	2	8	0	19	125	9.75276e+06	801390	490679	0	0
	3	147	4	1	6	0	5	4	2	5	17	0	2	2	8	0	19	111	9.81061e+06	1.00377e+06	518466	0	0
	3	141	0	4	2	0	2	5	14	0	15	1	0	5	5	0	0	67	9.02044e+06	933688	553094	0	0
	3	145	0	4	3	12	1	5	6	3	23	0	4	1	0	0	6	159	9.12106e+06	346069	467054	0	0
	3	116	1	4	5	6	4	4	8	1	29	0	4	1	6	0	17	173	8.31535e+06	169928	458895	0	0
	4	74	0	4	5	3	0	4	6	1	9	1	4	1	8	0	18	134	8.25008e+06	210310	471329	0	0
	3	141	0	4	3	0	2	5	14	0	15	1	0	5	5	0	0	70	9.02196e+06	934467	552729	0	0
	3	141	0	4	4	4	2	6	14	0	15	1	1	3	5	0	1	83	8.42393e+06	664271	501415	0	0
	3	147	4	1	6	0	5	4	2	5	17	0	2	2	8	0	19	113	9.81194e+06	1.00446e+06	518143	0	0
	4	82	0	4	4	5	0	5	7	0	11	1	3	1	8	0	18	172	8.35191e+06	600610	486027	0	0
	3	147	0	4	3	5	2	5	14	0	14	1	1	3	5	0	1	114	8.36484e+06	643023	497377	0	0
	1	145	0	4	0	2	1	5	7	3	25	0	4	1	0	0	4	95	9.24218e+06	850668	508702	0	0
	4	81	1	4	5	6	0	7	7	0	11	1	3	1	8	0	18	172	8.40561e+06	526610	478861	0	0
	3	147	4	1	6	0	6	4	2	4	17	0	2	2	8	0	19	79	9.44519e+06	1.00077e+06	510175	0	0
	4	76	1	3	5	3	0	4	5	1	8	1	4	1	8	0	18	134	8.21805e+06	238873	472147	0	0
	3	107	1	4	5	6	4	4	10	2	29	0	4	0	6	0	17	173	8.9388e+06	522944	475814	0	0
	3	147	4	1	6	0	6	4	2	5	18	0	2	2	8	0	19	121	9.82789e+06	1.01525e+06	505233	0	0
	3	121	0	4	5	1	5	4	14	0	14	1	4	1	1	0	4	188	8.70915e+06	901226	509538	0	0
	2	139	1	4	0	6	1	5	7	3	24	0	4	1	0	0	6	158	9.21127e+06	732481	487457	0	0
	4	82	1	3	3	5	1	5	7	1	11	1	3	1	8	0	17	169	8.55138e+06	194994	460332	0	0
	3	147	4	1	6	1	6	4	2	4	17	0	2	2	8	0	19	79	9.39692e+06	884888	502144	0	0
	2	176	1	4	0	20	1	4	0	3	12	0	12	0	8	0	8	97	8.65043e+06	360694	471906	0	0
	4	83	0	4	4	5	0	5	8	0	11	1	3	1	8	0	17	134	8.32238e+06	588285	491956	0	0
	2	139	1	4	1	5	1	5	7	3	24	0	4	1	1	0	6	149	9.20494e+06	720653	489214	0	0
	1	145	0	4	2	6	4	3	7	3	24	0	3	1	0	0	6	155	9.05208e+06	617749	489056	0	0
	3	145	0	4	3	12	1	5	6	3	24	0	4	1	0	0	7	160	9.12193e+06	346275	466959	0	0
	3	145	1	3	3	20	0	7	10	0	25	0	13	0	3	0	15	25	7.94664e+06	138122	476131	0	0
	1	152	1	4	0	2	2	6	8	3	24	0	5	1	0	3	6	149	9.56132e+06	916446	509585	0	0
	1	142	1	4	1	8	1	5	7	3	25	0	4	1	0	0	6	158	9.17786e+06	617081	479365	0	0
	3	141	0	4	4	4	2	6	14	0	15	1	1	3	5	0	0	67	8.41494e+06	659647	503584	0	0
	3	145	1	3	3	20	0	7	10	0	25	0	14	0	3	0	16	46	7.95984e+06	145206	472810	0	0
	2	145	0	4	3	11	1	5	6	3	23	0	4	1	0	0	6	159	9.12126e+06	382610	468380	0	0
	4	81	0	4	4	5	0	5	7	1	11	1	3	1	8	0	18	172	8.39436e+06	186802	459834	0	0
	4	81	0	4	5	1	5	4	14	0	15	1	5	1	1	0	4	194	8.73593e+06	898703	509070	0	0
	2	175	1	3	3	13	0	4	0	3	14	0	15	0	8	0	9	79	8.45949e+06	293726	473410	0	0
	3	139	1	4	0	3	1	5	7	3	24	0	4	1	0	0	5	149	9.2356e+06	829101	498268	0	0
	2	147	0	4	3	5	3	4	14	0	13	1	0	6	5	0	1	114	8.42999e+06	645324	493589	0	0
	4	76	1	3	5	3	0	4	5	1	8	1	4	1	8	0	18	134	8.21805e+06	238873	472147	0	0
	2	175	1	3	4	18	0	7	1	0	12	0	13	0	8	0	8	58	8.01532e+06	151069	470013	0	0
	1	145	0	4	0	2	1	5	8	3	24	0	4	1	0	3	6	159	9.48657e+06	869318	501220	0	0
--------------------------------------------------
#Generation	No.	-->37
#Variable_vector	Fitness_vector	Constraint_violation	Overall_penalty
	2	175	1	3	4	18	0	7	1	0	12	0	13	0	8	0	8	58	8.01532e+06	151069	470013	0	0
	2	176	1	4	4	12	1	4	0	3	12	0	11	0	8	0	8	99	8.65508e+06	279171	469055	0	0
	4	78	0	5	5	5	0	4	5	1	8	1	3	1	8	0	17	160	8.25992e+06	195162	465493	0	0
	1	144	0	5	2	8	4	3	7	3	23	0	3	1	0	0	6	155	9.05014e+06	547301	484066	0	0
	3	141	0	4	3	4	2	6	14	0	15	1	1	3	5	0	0	67	8.43023e+06	692072	506519	0	0
	2	141	4	1	6	2	4	4	1	5	18	0	2	2	8	0	19	129	9.57737e+06	785810	495664	0	0
	2	175	0	5	4	18	0	7	1	0	13	0	11	0	8	0	10	99	8.06539e+06	165289	463814	0	0
	2	144	1	4	1	8	4	4	7	3	25	0	2	2	1	1	6	158	9.26016e+06	622864	481386	0	0
	2	147	1	4	0	6	2	6	8	3	24	0	5	1	0	0	6	158	9.35764e+06	757426	495349	0	0
	4	81	0	5	5	5	0	5	4	0	11	1	3	1	8	0	19	145	8.30818e+06	561820	489194	0	0
	3	147	4	1	6	2	6	4	2	5	17	0	2	2	8	0	19	125	9.75276e+06	801390	490679	0	0
	3	141	0	4	2	0	2	5	14	0	15	1	0	5	5	0	0	67	9.02044e+06	933688	553094	0	0
	3	145	0	4	3	12	1	5	6	3	23	0	4	1	0	0	6	159	9.12106e+06	346069	467054	0	0
	3	116	1	4	5	6	4	4	8	1	29	0	4	1	6	0	17	173	8.31535e+06	169928	458895	0	0
	4	74	0	4	5	3	0	4	6	1	9	1	4	1	8	0	18	134	8.25008e+06	210310	471329	0	0
	3	141	0	4	3	0	2	5	14	0	15	1	0	5	5	0	0	70	9.02196e+06	934467	552729	0	0
	3	141	0	4	4	4	2	6	14	0	15	1	1	3	5	0	1	83	8.42393e+06	664271	501415	0	0
	3	147	4	1	6	0	5	4	2	5	17	0	2	2	8	0	19	113	9.81194e+06	1.00446e+06	518143	0	0
	4	82	0	4	4	5	0	5	7	0	11	1	3	1	8	0	18	172	8.35191e+06	600610	486027	0	0
	4	81	1	4	5	6	0	7	7	0	11	1	3	1	8	0	18	172	8.40561e+06	526610	478861	0	0
	3	147	4	1	6	0	6	4	2	4	17	0	2	2	8	0	19	79	9.44519e+06	1.00077e+06	510175	0	0
	4	76	1	3	5	3	0	4	5	1	8	1	4	1	8	0	18	134	8.21805e+06	238873	472147	0	0
	3	107	1	4	5	6	4	4	10	2	29	0	4	0	6	0	17	173	8.9388e+06	522944	475814	0	0
	3	147	4	1	6	0	6	4	2	5	18	0	2	2	8	0	19	121	9.82789e+06	1.01525e+06	505233	0	0
	4	82	1	3	3	5	1	5	7	1	11	1	3	1	8	0	17	169	8.55138e+06	194994	460332	0	0
	2	176	1	4	0	20	1	4	0	3	12	0	12	0	8	0	8	97	8.65043e+06	360694	471906	0	0
	4	83	0	4	4	5	0	5	8	0	11	1	3	1	8	0	17	134	8.32238e+06	588285	491956	0	0
	2	139	1	4	1	5	1	5	7	3	24	0	4	1	1	0	6	149	9.20494e+06	720653	489214	0	0
	1	145	0	4	2	6	4	3	7	3	24	0	3	1	0	0	6	155	9.05208e+06	617749	489056	0	0
	3	145	0	4	3	12	1	5	6	3	24	0	4	1	0	0	7	160	9.12193e+06	346275	466959	0	0
	3	145	1	3	3	20	0	7	10	0	25	0	13	0	3	0	15	25	7.94664e+06	138122	476131	0	0
	1	152	1	4	0	2	2	6	8	3	24	0	5	1	0	3	6	149	9.56132e+06	916446	509585	0	0
	1	142	1	4	1	8	1	5	7	3	25	0	4	1	0	0	6	158	9.17786e+06	617081	479365	0	0
	3	141	0	4	4	4	2	6	14	0	15	1	1	3	5	0	0	67	8.41494e+06	659647	503584	0	0
	3	145	1	3	3	20	0	7	10	0	25	0	14	0	3	0	16	46	7.95984e+06	145206	472810	0	0
	2	145	0	4	3	11	1	5	6	3	23	0	4	1	0	0	6	159	9.12126e+06	382610	468380	0	0
	4	81	0	4	4	5	0	5	7	1	11	1	3	1	8	0	18	172	8.39436e+06	186802	459834	0	0
	2	175	1	3	3	13	0	4	0	3	14	0	15	0	8	0	9	79	8.45949e+06	293726	473410	0	0
	4	76	1	3	5	3	0	4	5	1	8	1	4	1	8	0	18	134	8.21805e+06	238873	472147	0	0
	2	147	1	4	1	5	1	6	8	3	24	0	5	1	0	0	6	158	9.40616e+06	745056	485783	0	0
	3	141	0	4	3	3	2	5	14	0	15	1	0	5	6	0	0	67	8.57418e+06	735317	519909	0	0
	3	140	4	1	6	2	6	4	1	5	17	0	1	2	8	0	19	122	9.64353e+06	797893	491500	0	0
	3	147	0	4	3	5	2	5	14	0	13	1	1	3	5	0	1	114	8.33052e+06	643023	495962	0	0
	2	147	0	4	3	5	4	4	14	0	14	1	0	6	5	0	1	114	8.4842e+06	645607	491006	0	0
	4	81	1	4	5	6	0	5	8	0	11	1	3	1	8	0	18	172	8.24533e+06	515883	479423	0	0
	4	81	0	4	4	5	0	7	6	1	11	1	3	1	8	0	18	172	8.61731e+06	196884	461723	0	0
	2	147	1	4	0	6	2	6	8	3	24	0	5	1	0	0	6	158	9.35764e+06	757426	495349	0	0
	2	139	1	4	0	6	1	5	7	3	24	0	4	1	0	0	6	158	9.21127e+06	732481	487457	0	0
	3	147	4	1	6	0	5	4	2	5	17	0	2	2	8	0	18	113	9.81045e+06	1.00387e+06	518416	0	0
	3	123	0	4	5	1	6	4	14	0	14	1	4	1	1	0	4	188	8.69295e+06	907239	498150	0	0
--------------------------------------------------
#Generation	No.	-->38
#Variable_vector	Fitness_vector	Constraint_violation	Overall_penalty
	2	176	1	4	4	12	1	4	0	3	12	0	11	0	8	0	8	99	8.65508e+06	279171	469055	0	0
	1	144	0	5	2	8	4	3	7	3	23	0	3	1	0	0	6	155	9.05014e+06	547301	484066	0	0
	3	141	0	4	3	4	2	6	14	0	15	1	1	3	5	0	0	67	8.43023e+06	692072	506519	0	0
	2	141	4	1	6	2	4	4	1	5	18	0	2	2	8	0	19	129	9.57737e+06	785810	495664	0	0
	2	175	0	5	4	18	0	7	1	0	13	0	11	0	8	0	10	99	8.06539e+06	165289	463814	0	0
	2	144	1	4	1	8	4	4	7	3	25	0	2	2	1	1	6	158	9.26016e+06	622864	481386	0	0
	2	147	1	4	0	6	2	6	8	3	24	0	5	1	0	0	6	158	9.35764e+06	757426	495349	0	0
	4	81	0	5	5	5	0	5	4	0	11	1	3	1	8	0	19	145	8.30818e+06	561820	489194	0	0
	3	147	4	1	6	2	6	4	2	5	17	0	2	2	8	0	19	125	9.75276e+06	801390	490679	0	0
	3	141	0	4	2	0	2	5	14	0	15	1	0	5	5	0	0	67	9.02044e+06	933688	553094	0	0
	3	145	0	4	3	12	1	5	6	3	23	0	4	1	0	0	6	159	9.12106e+06	346069	467054	0	0
	4	74	0	4	5	3	0	4	6	1	9	1	4	1	8	0	18	134	8.25008e+06	210310	471329	0	0
	3	141	0	4	3	0	2	5	14	0	15	1	0	5	5	0	0	70	9.02196e+06	934467	552729	0	0
	3	141	0	4	4	4	2	6	14	0	15	1	1	3	5	0	1	83	8.42393e+06	664271	501415	0	0
	4	81	1	4	5	6	0	7	7	0	11	1	3	1	8	0	18	172	8.40561e+06	526610	478861	0	0
	3	147	4	1	6	0	6	4	2	4	17	0	2	2	8	0	19	79	9.44519e+06	1.00077e+06	510175	0	0
	4	76	1	3	5	3	0	4	5	1	8	1	4	1	8	0	18	134	8.21805e+06	238873	472147	0	0
	3	107	1	4	5	6	4	4	10	2	29	0	4	0	6	0	17	173	8.9388e+06	522944	475814	0	0
	3	147	4	1	6	0	6	4	2	5	18	0	2	2	8	0	19	121	9.82789e+06	1.01525e+06	505233	0	0
	4	82	1	3	3	5	1	5	7	1	11	1	3	1	8	0	17	169	8.55138e+06	194994	460332	0	0
	2	176	1	4	0	20	1	4	0	3	12	0	12	0	8	0	8	97	8.65043e+06	360694	471906	0	0
	3	145	0	4	3	12	1	5	6	3	24	0	4	1	0	0	7	160	9.12193e+06	346275	466959	0	0
	3	145	1	3	3	20	0	7	10	0	25	0	13	0	3	0	15	25	7.94664e+06	138122	476131	0	0
	1	152	1	4	0	2	2	6	8	3	24	0	5	1	0	3	6	149	9.56132e+06	916446	509585	0	0
	3	141	0	4	4	4	2	6	14	0	15	1	1	3	5	0	0	67	8.41494e+06	659647	503584	0	0
	3	145	1	3	3	20	0	7	10	0	25	0	14	0	3	0	16	46	7.95984e+06	145206	472810	0	0
	2	145	0	4	3	11	1	5	6	3	23	0	4	1	0	0	6	159	9.12126e+06	382610	468380	0	0
	4	81	0	4	4	5	0	5	7	1	11	1	3	1	8	0	18	172	8.39436e+06	186802	459834	0	0
	2	175	1	3	3	13	0	4	0	3	14	0	15	0	8	0	9	79	8.45949e+06	293726	473410	0	0
	4	76	1	3	5	3	0	4	5	1	8	1	4	1	8	0	18	134	8.21805e+06	238873	472147	0	0
	2	147	1	4	1	5	1	6	8	3	24	0	5	1	0	0	6	158	9.40616e+06	745056	485783	0	0
	3	140	4	1	6	2	6	4	1	5	17	0	1	2	8	0	19	122	9.64353e+06	797893	491500	0	0
	3	147	0	4	3	5	2	5	14	0	13	1	1	3	5	0	1	114	8.33052e+06	643023	495962	0	0
	2	147	0	4	3	5	4	4	14	0	14	1	0	6	5	0	1	114	8.4842e+06	645607	491006	0	0
	4	81	1	4	5	6	0	5	8	0	11	1	3	1	8	0	18	172	8.24533e+06	515883	479423	0	0
[truncated: 104,001 more rows]

## Sheet: Sheet2
#Generation	No.	-->1
#Variable_vector	Fitness_vector	Constraint_violation	Overall_penalty
	1	74	2	2	1	22	8	3	10	2	29	0	10	0	5	0	6	197	9165622272	-203222640	473590	0	0
	4	4	1	4	5	7	6	3	3	3	0	0	7	0	3	1	17	35	9404758016	-323774112	516924	0	0
	3	160	0	4	3	21	0	7	8	0	25	0	12	0	3	0	15	37	7987076096	-141472224	472858	0	0
	0	69	0	5	3	24	1	5	4	1	28	0	5	0	1	0	5	121	8715111424	-94530760	477939	0	0
	0	166	0	5	3	16	8	3	1	1	17	0	16	0	1	1	6	26	8312244224	-124455872	477490	0	0
	0	76	4	1	5	2	4	6	1	5	12	0	5	0	0	1	7	62	10166687744	-742870912	525421	0	0
	1	13	1	3	5	0	4	7	3	1	12	0	17	0	4	0	3	198	9460070400	-407042112	525950	0	0
	2	118	1	4	4	3	9	2	3	4	1	1	8	1	8	0	0	38	9678815232	-692477824	517499	0	0
	1	41	4	1	6	6	8	2	8	3	13	0	0	3	8	0	18	167	9436401664	-414297280	500067	0	0
	0	182	2	2	0	8	6	4	12	1	22	0	16	0	2	1	6	8	8540788224	-127636848	487073	0	0
	4	93	2	2	2	13	2	3	5	2	24	0	5	1	8	0	16	144	8382394880	-159217440	473440	0	0
	2	141	0	4	3	7	1	4	10	3	21	0	4	2	1	0	6	110	9290301440	-525484544	484480	0	0
	3	43	0	5	4	5	1	4	10	0	16	1	0	8	5	0	1	112	9029409792	-508742848	522162	0	0
	1	202	2	2	6	14	0	8	6	1	16	0	14	0	6	0	5	0	8478717440	-130429072	483100	0	0
	4	48	2	2	1	9	4	7	9	1	16	0	2	0	6	0	10	176	9086909440	-133977560	472614	0	0
	3	107	1	4	5	10	2	5	10	1	28	0	5	0	6	0	15	90	8270913536	-129520144	477387	0	0
	2	147	4	1	6	0	6	4	2	5	17	0	3	2	8	0	19	20	9796712448	-979377600	521891	0	0
	4	66	0	5	5	3	0	5	5	1	9	2	5	1	8	0	19	171	8798642176	-244438112	470471	0	0
	1	29	4	1	4	2	5	5	6	1	14	0	4	0	5	0	15	39	8721298432	-157265680	513257	0	0
	3	60	4	1	6	4	3	3	6	3	29	0	8	0	3	1	4	140	9144532992	-547837696	506446	0	0
	2	17	0	5	1	6	2	9	2	1	26	0	2	2	2	0	19	147	9250961408	-233157568	509493	0	0
	2	176	1	4	3	13	1	4	0	3	12	0	10	0	8	0	8	99	8631272448	-301726048	469809	0	0
	3	66	0	4	6	9	1	6	8	1	3	0	1	2	3	0	3	56	8616002560	-85210616	489183	0	0
	3	138	0	4	3	18	6	4	7	2	10	0	8	0	2	0	11	21	8898746368	-152602240	479419	0	0
	0	170	2	2	1	1	4	4	10	3	15	0	3	2	6	0	19	49	9577745408	-897844416	519995	0	0
	1	117	1	3	5	1	5	3	14	0	14	1	5	1	2	1	4	188	9154760704	-824958848	533473	0	0
	4	26	0	4	1	19	6	5	0	0	20	0	12	0	4	0	6	27	8680345600	-179385760	510884	0	0
	3	163	0	4	3	21	0	7	9	0	25	0	12	0	3	0	14	1	7964870656	-130305736	478297	0	0
	0	210	2	2	6	14	0	8	6	1	16	0	14	0	6	0	6	43	8576091648	-137808672	478982	0	0
	4	66	0	5	5	3	0	5	5	1	8	1	4	1	8	0	19	171	8444333568	-244438112	470338	0	0
	2	1	2	2	6	2	8	3	7	0	13	1	0	6	6	0	12	148	9375821824	-661723136	539238	0	0
	2	141	0	4	3	7	1	4	10	3	22	0	4	2	1	0	6	110	9290301440	-525484544	484480	0	0
	4	35	0	4	4	5	1	4	11	0	16	1	1	4	5	0	1	112	8897573888	-514388224	519366	0	0
	2	175	1	4	4	18	1	6	0	3	12	0	10	0	8	0	8	99	9083246592	-162893984	464322	0	0
	3	54	2	2	0	25	0	4	3	4	27	0	5	0	3	1	16	181	9417099264	-230384608	470635	0	0
	1	202	2	2	5	4	0	8	6	1	16	0	14	0	6	0	5	0	8224205824	-175547360	486282	0	0
	1	117	0	4	5	1	5	3	14	0	15	1	5	1	1	0	4	188	9043078144	-824958848	530903	0	0
	2	118	1	4	4	3	9	2	3	4	0	1	8	1	8	0	0	33	9678749696	-691180352	518107	0	0
	3	86	0	5	3	5	1	4	11	1	15	1	0	8	6	0	1	97	8777043968	-117584840	480723	0	0
	1	41	4	1	6	6	8	2	8	3	13	0	0	3	8	0	17	166	9436059648	-413843648	500279	0	0
	3	60	4	1	6	4	3	3	6	3	29	0	8	0	3	1	4	140	9144532992	-547837696	506446	0	0
	4	64	1	3	5	7	7	3	8	2	16	0	16	0	0	1	18	47	8758910976	-105070896	499113	0	0
	0	166	0	4	3	16	8	3	1	1	17	0	16	0	1	1	5	25	8301160960	-124019088	477505	0	0
	3	138	0	5	3	18	6	4	7	2	10	0	8	0	2	0	12	22	8910387200	-153020864	479429	0	0
	0	61	0	4	3	16	8	3	1	1	17	0	16	0	1	1	7	28	8518714368	-64933284	491990	0	0
	1	148	4	1	4	16	4	3	10	2	5	0	13	0	7	0	4	48	8712719360	-157887024	474194	0	0
	3	43	0	5	4	5	1	4	10	0	16	1	0	8	5	0	1	112	9029409792	-508742848	522162	0	0
	1	74	2	2	1	22	8	3	10	2	29	0	11	0	5	0	6	197	9165622272	-203222640	473590	0	0
	2	176	0	5	3	13	1	4	0	3	12	0	10	0	8	0	8	99	8643277824	-301726048	470094	0	0
	4	19	1	4	3	20	2	4	4	1	16	0	1	2	0	0	10	118	8551058432	-65984428	483559	0	0
--------------------------------------------------
#Generation	No.	-->2
#Variable_vector	Fitness_vector	Constraint_violation	Overall_penalty
	4	4	1	4	5	7	6	3	3	3	0	0	7	0	3	1	17	35	9404758016	-323774112	516924	0	0
	3	160	0	4	3	21	0	7	8	0	25	0	12	0	3	0	15	37	7987076096	-141472224	472858	0	0
	0	76	4	1	5	2	4	6	1	5	12	0	5	0	0	1	7	62	10166687744	-742870912	525421	0	0
	1	13	1	3	5	0	4	7	3	1	12	0	17	0	4	0	3	198	9460070400	-407042112	525950	0	0
	2	118	1	4	4	3	9	2	3	4	1	1	8	1	8	0	0	38	9678815232	-692477824	517499	0	0
	1	41	4	1	6	6	8	2	8	3	13	0	0	3	8	0	18	167	9436401664	-414297280	500067	0	0
	4	93	2	2	2	13	2	3	5	2	24	0	5	1	8	0	16	144	8382394880	-159217440	473440	0	0
	2	141	0	4	3	7	1	4	10	3	21	0	4	2	1	0	6	110	9290301440	-525484544	484480	0	0
	3	43	0	5	4	5	1	4	10	0	16	1	0	8	5	0	1	112	9029409792	-508742848	522162	0	0
	1	202	2	2	6	14	0	8	6	1	16	0	14	0	6	0	5	0	8478717440	-130429072	483100	0	0
	3	107	1	4	5	10	2	5	10	1	28	0	5	0	6	0	15	90	8270913536	-129520144	477387	0	0
	2	147	4	1	6	0	6	4	2	5	17	0	3	2	8	0	19	20	9796712448	-979377600	521891	0	0
	4	66	0	5	5	3	0	5	5	1	9	2	5	1	8	0	19	171	8798642176	-244438112	470471	0	0
	3	60	4	1	6	4	3	3	6	3	29	0	8	0	3	1	4	140	9144532992	-547837696	506446	0	0
	2	176	1	4	3	13	1	4	0	3	12	0	10	0	8	0	8	99	8631272448	-301726048	469809	0	0
	0	170	2	2	1	1	4	4	10	3	15	0	3	2	6	0	19	49	9577745408	-897844416	519995	0	0
	1	117	1	3	5	1	5	3	14	0	14	1	5	1	2	1	4	188	9154760704	-824958848	533473	0	0
	4	26	0	4	1	19	6	5	0	0	20	0	12	0	4	0	6	27	8680345600	-179385760	510884	0	0
	3	163	0	4	3	21	0	7	9	0	25	0	12	0	3	0	14	1	7964870656	-130305736	478297	0	0
	0	210	2	2	6	14	0	8	6	1	16	0	14	0	6	0	6	43	8576091648	-137808672	478982	0	0
	4	66	0	5	5	3	0	5	5	1	8	1	4	1	8	0	19	171	8444333568	-244438112	470338	0	0
	2	141	0	4	3	7	1	4	10	3	22	0	4	2	1	0	6	110	9290301440	-525484544	484480	0	0
	4	35	0	4	4	5	1	4	11	0	16	1	1	4	5	0	1	112	8897573888	-514388224	519366	0	0
	2	175	1	4	4	18	1	6	0	3	12	0	10	0	8	0	8	99	9083246592	-162893984	464322	0	0
	1	202	2	2	5	4	0	8	6	1	16	0	14	0	6	0	5	0	8224205824	-175547360	486282	0	0
	1	117	0	4	5	1	5	3	14	0	15	1	5	1	1	0	4	188	9043078144	-824958848	530903	0	0
	2	118	1	4	4	3	9	2	3	4	0	1	8	1	8	0	0	33	9678749696	-691180352	518107	0	0
	1	41	4	1	6	6	8	2	8	3	13	0	0	3	8	0	17	166	9436059648	-413843648	500279	0	0
	3	60	4	1	6	4	3	3	6	3	29	0	8	0	3	1	4	140	9144532992	-547837696	506446	0	0
	0	166	0	4	3	16	8	3	1	1	17	0	16	0	1	1	5	25	8301160960	-124019088	477505	0	0
	1	148	4	1	4	16	4	3	10	2	5	0	13	0	7	0	4	48	8712719360	-157887024	474194	0	0
	3	43	0	5	4	5	1	4	10	0	16	1	0	8	5	0	1	112	9029409792	-508742848	522162	0	0
	2	176	0	5	3	13	1	4	0	3	12	0	10	0	8	0	8	99	8643277824	-301726048	470094	0	0
	4	94	2	2	2	13	2	3	5	2	24	0	5	1	8	0	16	144	8381166592	-159814976	473301	0	0
	0	169	2	2	0	1	4	4	10	3	15	0	3	2	6	0	19	49	9582676992	-908478336	520790	0	0
	2	118	1	4	4	3	9	2	3	4	0	1	8	1	8	0	0	33	9678749696	-691180352	518107	0	0
	2	141	0	4	3	7	1	4	10	3	22	0	4	2	1	0	6	110	9290301440	-525484544	484480	0	0
	2	116	4	1	6	6	8	2	8	3	14	0	0	9	8	0	17	156	9284896768	-469835584	487171	0	0
	3	61	4	1	6	4	3	4	6	3	29	0	8	0	3	1	4	140	9281405952	-578734848	503108	0	0
	3	107	1	4	5	10	2	5	10	1	28	0	5	1	6	0	16	176	8400611840	-158508672	463794	0	0
	2	117	1	4	4	3	9	2	3	4	0	1	8	1	8	0	1	159	9745950720	-724272896	502485	0	0
	4	66	0	5	5	3	0	5	5	1	9	1	3	1	8	0	19	145	8409376256	-235472096	474527	0	0
	3	43	0	5	4	5	1	4	11	0	16	1	0	8	5	0	1	108	9027341312	-507682016	522659	0	0
	2	175	1	4	4	18	1	6	0	3	12	0	10	0	8	0	9	103	9085717504	-163990368	463807	0	0
	0	166	0	5	3	16	8	3	1	1	17	0	16	0	1	1	6	26	8312244224	-124455872	477490	0	0
	2	175	1	4	4	18	0	7	0	3	12	0	11	0	8	0	8	99	8964012032	-162893984	464649	0	0
	2	118	0	5	4	3	8	2	2	2	1	1	8	1	8	0	0	33	8432201728	-130418264	487681	0	0
	4	66	0	5	5	3	0	5	5	1	9	2	5	1	8	0	19	171	8798642176	-244438112	470471	0	0
	1	117	1	3	5	1	5	3	14	0	14	1	5	1	2	1	4	188	9154760704	-824958848	533473	0	0
	4	86	2	2	1	15	2	3	4	2	24	0	5	1	8	0	16	144	8366248960	-154947360	472335	0	0
--------------------------------------------------
#Generation	No.	-->3
#Variable_vector	Fitness_vector	Constraint_violation	Overall_penalty
	3	160	0	4	3	21	0	7	8	0	25	0	12	0	3	0	15	37	7987076096	-141472224	472858	0	0
	0	76	4	1	5	2	4	6	1	5	12	0	5	0	0	1	7	62	10166687744	-742870912	525421	0	0
	2	118	1	4	4	3	9	2	3	4	1	1	8	1	8	0	0	38	9678815232	-692477824	517499	0	0
	2	141	0	4	3	7	1	4	10	3	21	0	4	2	1	0	6	110	9290301440	-525484544	484480	0	0
	3	107	1	4	5	10	2	5	10	1	28	0	5	0	6	0	15	90	8270913536	-129520144	477387	0	0
	2	147	4	1	6	0	6	4	2	5	17	0	3	2	8	0	19	20	9796712448	-979377600	521891	0	0
	3	60	4	1	6	4	3	3	6	3	29	0	8	0	3	1	4	140	9144532992	-547837696	506446	0	0
	2	176	1	4	3	13	1	4	0	3	12	0	10	0	8	0	8	99	8631272448	-301726048	469809	0	0
	0	170	2	2	1	1	4	4	10	3	15	0	3	2	6	0	19	49	9577745408	-897844416	519995	0	0
	3	163	0	4	3	21	0	7	9	0	25	0	12	0	3	0	14	1	7964870656	-130305736	478297	0	0
	4	66	0	5	5	3	0	5	5	1	8	1	4	1	8	0	19	171	8444333568	-244438112	470338	0	0
	2	141	0	4	3	7	1	4	10	3	22	0	4	2	1	0	6	110	9290301440	-525484544	484480	0	0
	4	35	0	4	4	5	1	4	11	0	16	1	1	4	5	0	1	112	8897573888	-514388224	519366	0	0
	2	175	1	4	4	18	1	6	0	3	12	0	10	0	8	0	8	99	9083246592	-162893984	464322	0	0
	1	202	2	2	5	4	0	8	6	1	16	0	14	0	6	0	5	0	8224205824	-175547360	486282	0	0
	1	117	0	4	5	1	5	3	14	0	15	1	5	1	1	0	4	188	9043078144	-824958848	530903	0	0
	2	118	1	4	4	3	9	2	3	4	0	1	8	1	8	0	0	33	9678749696	-691180352	518107	0	0
	3	60	4	1	6	4	3	3	6	3	29	0	8	0	3	1	4	140	9144532992	-547837696	506446	0	0
	2	176	0	5	3	13	1	4	0	3	12	0	10	0	8	0	8	99	8643277824	-301726048	470094	0	0
	4	94	2	2	2	13	2	3	5	2	24	0	5	1	8	0	16	144	8381166592	-159814976	473301	0	0
	0	169	2	2	0	1	4	4	10	3	15	0	3	2	6	0	19	49	9582676992	-908478336	520790	0	0
	2	141	0	4	3	7	1	4	10	3	22	0	4	2	1	0	6	110	9290301440	-525484544	484480	0	0
	2	116	4	1	6	6	8	2	8	3	14	0	0	9	8	0	17	156	9284896768	-469835584	487171	0	0
	3	61	4	1	6	4	3	4	6	3	29	0	8	0	3	1	4	140	9281405952	-578734848	503108	0	0
	3	107	1	4	5	10	2	5	10	1	28	0	5	1	6	0	16	176	8400611840	-158508672	463794	0	0
	2	117	1	4	4	3	9	2	3	4	0	1	8	1	8	0	1	159	9745950720	-724272896	502485	0	0
	2	175	1	4	4	18	1	6	0	3	12	0	10	0	8	0	9	103	9085717504	-163990368	463807	0	0
	2	175	1	4	4	18	0	7	0	3	12	0	11	0	8	0	8	99	8964012032	-162893984	464649	0	0
	1	117	1	3	5	1	5	3	14	0	14	1	5	1	2	1	4	188	9154760704	-824958848	533473	0	0
	4	86	2	2	1	15	2	3	4	2	24	0	5	1	8	0	16	144	8366248960	-154947360	472335	0	0
	2	115	0	4	6	1	5	3	14	0	15	1	5	1	1	0	4	188	9025754112	-818862272	530483	0	0
	2	118	1	4	5	4	9	2	3	4	0	0	8	1	8	0	0	33	9387657216	-601490304	510487	0	0
	1	200	2	2	6	4	0	8	6	1	16	0	16	0	6	0	5	0	8239464960	-169696912	487395	0	0
	1	202	2	2	5	4	0	8	6	1	16	0	14	0	6	0	5	0	8224205824	-175547360	486282	0	0
	2	176	0	5	3	13	1	4	0	3	12	0	11	0	8	0	8	99	8643277824	-301726048	470094	0	0
	3	161	1	4	4	3	9	2	3	4	0	1	7	1	8	0	0	31	9650880512	-708041664	514146	0	0
	2	175	1	4	4	18	0	7	0	0	12	0	11	0	8	0	7	56	8025206272	-150143776	470628	0	0
	1	141	0	4	2	8	1	4	9	3	23	0	4	2	1	0	6	110	9269864448	-530614784	489833	0	0
	4	71	0	5	5	3	0	5	5	1	9	1	3	1	8	0	19	145	8388405248	-240240192	473324	0	0
	2	134	0	4	3	7	1	4	10	3	22	0	4	2	1	0	6	110	9296405504	-522689408	485169	0	0
	4	116	0	5	4	5	1	4	11	0	15	1	1	4	5	0	1	112	8557602304	-583535424	498237	0	0
	2	118	1	4	4	3	9	2	3	4	1	1	8	1	8	0	0	38	9678815232	-692477824	517499	0	0
	1	103	1	4	4	3	9	2	3	4	0	0	8	1	8	0	0	33	9466853376	-682470016	520247	0	0
	4	78	0	5	5	3	0	5	5	1	10	1	3	1	8	0	19	145	8369693184	-245890464	471913	0	0
	2	118	1	4	4	3	9	2	3	4	0	1	8	1	8	0	0	33	9678749696	-691180352	518107	0	0
	2	118	1	4	4	3	9	2	3	4	0	1	8	1	8	0	0	33	9678749696	-691180352	518107	0	0
	4	94	2	2	2	13	2	3	5	2	24	0	5	1	8	0	16	144	8381166592	-159814976	473301	0	0
	2	118	1	4	5	3	9	2	3	4	0	1	8	1	8	0	0	33	9668271104	-667611392	516971	0	0
	3	163	0	4	3	21	0	7	9	0	26	0	12	0	3	0	13	1	7964874752	-130305040	478297	0	0
	2	116	4	1	6	6	8	2	8	3	14	0	0	9	8	0	17	156	9284896768	-469835584	487171	0	0
--------------------------------------------------
#Generation	No.	-->4
#Variable_vector	Fitness_vector	Constraint_violation	Overall_penalty
	3	160	0	4	3	21	0	7	8	0	25	0	12	0	3	0	15	37	7987076096	-141472224	472858	0	0
	2	141	0	4	3	7	1	4	10	3	21	0	4	2	1	0	6	110	9290301440	-525484544	484480	0	0
	2	147	4	1	6	0	6	4	2	5	17	0	3	2	8	0	19	20	9796712448	-979377600	521891	0	0
	2	176	1	4	3	13	1	4	0	3	12	0	10	0	8	0	8	99	8631272448	-301726048	469809	0	0
	0	170	2	2	1	1	4	4	10	3	15	0	3	2	6	0	19	49	9577745408	-897844416	519995	0	0
	3	163	0	4	3	21	0	7	9	0	25	0	12	0	3	0	14	1	7964870656	-130305736	478297	0	0
	4	66	0	5	5	3	0	5	5	1	8	1	4	1	8	0	19	171	8444333568	-244438112	470338	0	0
	2	141	0	4	3	7	1	4	10	3	22	0	4	2	1	0	6	110	9290301440	-525484544	484480	0	0
	4	35	0	4	4	5	1	4	11	0	16	1	1	4	5	0	1	112	8897573888	-514388224	519366	0	0
	2	175	1	4	4	18	1	6	0	3	12	0	10	0	8	0	8	99	9083246592	-162893984	464322	0	0
	1	202	2	2	5	4	0	8	6	1	16	0	14	0	6	0	5	0	8224205824	-175547360	486282	0	0
	1	117	0	4	5	1	5	3	14	0	15	1	5	1	1	0	4	188	9043078144	-824958848	530903	0	0
	0	169	2	2	0	1	4	4	10	3	15	0	3	2	6	0	19	49	9582676992	-908478336	520790	0	0
	2	141	0	4	3	7	1	4	10	3	22	0	4	2	1	0	6	110	9290301440	-525484544	484480	0	0
	3	61	4	1	6	4	3	4	6	3	29	0	8	0	3	1	4	140	9281405952	-578734848	503108	0	0
	3	107	1	4	5	10	2	5	10	1	28	0	5	1	6	0	16	176	8400611840	-158508672	463794	0	0
	2	117	1	4	4	3	9	2	3	4	0	1	8	1	8	0	1	159	9745950720	-724272896	502485	0	0
	2	175	1	4	4	18	1	6	0	3	12	0	10	0	8	0	9	103	9085717504	-163990368	463807	0	0
	2	175	1	4	4	18	0	7	0	3	12	0	11	0	8	0	8	99	8964012032	-162893984	464649	0	0
	1	117	1	3	5	1	5	3	14	0	14	1	5	1	2	1	4	188	9154760704	-824958848	533473	0	0
	2	115	0	4	6	1	5	3	14	0	15	1	5	1	1	0	4	188	9025754112	-818862272	530483	0	0
	2	118	1	4	5	4	9	2	3	4	0	0	8	1	8	0	0	33	9387657216	-601490304	510487	0	0
	1	202	2	2	5	4	0	8	6	1	16	0	14	0	6	0	5	0	8224205824	-175547360	486282	0	0
	2	176	0	5	3	13	1	4	0	3	12	0	11	0	8	0	8	99	8643277824	-301726048	470094	0	0
	3	161	1	4	4	3	9	2	3	4	0	1	7	1	8	0	0	31	9650880512	-708041664	514146	0	0
	2	175	1	4	4	18	0	7	0	0	12	0	11	0	8	0	7	56	8025206272	-150143776	470628	0	0
	4	71	0	5	5	3	0	5	5	1	9	1	3	1	8	0	19	145	8388405248	-240240192	473324	0	0
	2	134	0	4	3	7	1	4	10	3	22	0	4	2	1	0	6	110	9296405504	-522689408	485169	0	0
	4	116	0	5	4	5	1	4	11	0	15	1	1	4	5	0	1	112	8557602304	-583535424	498237	0	0
	1	103	1	4	4	3	9	2	3	4	0	0	8	1	8	0	0	33	9466853376	-682470016	520247	0	0
	4	78	0	5	5	3	0	5	5	1	10	1	3	1	8	0	19	145	8369693184	-245890464	471913	0	0
	3	163	0	4	3	21	0	7	9	0	26	0	12	0	3	0	13	1	7964874752	-130305040	478297	0	0
	3	107	1	4	5	10	3	4	10	1	28	0	5	1	6	0	16	176	8471301120	-158508672	463785	0	0
	2	161	1	4	4	3	9	2	3	4	0	1	7	1	8	0	0	31	9665402880	-707085056	514442	0	0
	4	72	0	5	5	3	0	5	5	1	8	1	4	1	8	0	18	88	8360003072	-220886816	482582	0	0
	2	115	0	4	6	1	5	3	14	0	15	1	5	1	2	1	4	188	9088742400	-818862272	530473	0	0
	4	94	2	2	2	13	2	3	4	2	24	0	5	1	8	0	16	144	8345826304	-159880976	470725	0	0
	2	175	1	4	4	18	1	6	1	3	12	0	10	0	8	0	8	103	9118532608	-164047712	463781	0	0
	2	141	0	4	3	7	1	4	10	3	22	0	4	2	1	0	6	110	9290301440	-525484544	484480	0	0
	3	126	4	1	6	6	8	2	8	3	14	0	0	9	8	0	17	155	9254714368	-475429824	485818	0	0
	2	118	1	4	5	4	9	2	4	4	0	0	9	1	8	0	0	178	9555511296	-639117248	493100	0	0
	3	147	4	1	6	0	6	4	2	5	17	0	3	2	8	0	19	20	9781493760	-980421184	521569	0	0
	2	161	1	4	3	3	9	2	3	4	0	1	7	1	8	0	0	31	9682463744	-731681280	517484	0	0
	2	141	0	4	3	7	1	4	10	3	21	0	4	2	1	0	6	110	9290301440	-525484544	484480	0	0
	2	142	1	3	4	18	0	7	1	0	12	0	12	0	8	0	7	56	8003916800	-140262400	472607	0	0
	2	175	1	4	4	18	1	6	0	3	12	0	11	0	8	0	8	97	9082134528	-162317120	464592	0	0
	4	66	0	5	5	3	0	5	5	1	8	1	4	1	8	0	19	171	8444333568	-244438112	470338	0	0
	4	66	0	5	5	3	0	5	5	1	8	1	4	1	8	0	19	171	8444333568	-244438112	470338	0	0
	2	142	1	4	4	18	0	7	1	3	12	0	12	0	8	0	8	99	8988647424	-153012608	466867	0	0
	2	174	0	4	3	7	2	4	9	3	21	0	4	2	1	0	6	110	9174932480	-539050240	486652	0	0
--------------------------------------------------
#Generation	No.	-->5
#Variable_vector	Fitness_vector	Constraint_violation	Overall_penalty
	3	160	0	4	3	21	0	7	8	0	25	0	12	0	3	0	15	37	7987076096	-141472224	472858	0	0
	2	147	4	1	6	0	6	4	2	5	17	0	3	2	8	0	19	20	9796712448	-979377600	521891	0	0
	2	176	1	4	3	13	1	4	0	3	12	0	10	0	8	0	8	99	8631272448	-301726048	469809	0	0
	0	170	2	2	1	1	4	4	10	3	15	0	3	2	6	0	19	49	9577745408	-897844416	519995	0	0
	3	163	0	4	3	21	0	7	9	0	25	0	12	0	3	0	14	1	7964870656	-130305736	478297	0	0
	4	66	0	5	5	3	0	5	5	1	8	1	4	1	8	0	19	171	8444333568	-244438112	470338	0	0
	2	175	1	4	4	18	1	6	0	3	12	0	10	0	8	0	8	99	9083246592	-162893984	464322	0	0
	1	202	2	2	5	4	0	8	6	1	16	0	14	0	6	0	5	0	8224205824	-175547360	486282	0	0
	0	169	2	2	0	1	4	4	10	3	15	0	3	2	6	0	19	49	9582676992	-908478336	520790	0	0
	3	107	1	4	5	10	2	5	10	1	28	0	5	1	6	0	16	176	8400611840	-158508672	463794	0	0
	2	117	1	4	4	3	9	2	3	4	0	1	8	1	8	0	1	159	9745950720	-724272896	502485	0	0
	2	175	1	4	4	18	1	6	0	3	12	0	10	0	8	0	9	103	9085717504	-163990368	463807	0	0
	2	175	1	4	4	18	0	7	0	3	12	0	11	0	8	0	8	99	8964012032	-162893984	464649	0	0
	1	202	2	2	5	4	0	8	6	1	16	0	14	0	6	0	5	0	8224205824	-175547360	486282	0	0
	2	176	0	5	3	13	1	4	0	3	12	0	11	0	8	0	8	99	8643277824	-301726048	470094	0	0
	4	116	0	5	4	5	1	4	11	0	15	1	1	4	5	0	1	112	8557602304	-583535424	498237	0	0
	4	78	0	5	5	3	0	5	5	1	10	1	3	1	8	0	19	145	8369693184	-245890464	471913	0	0
	3	163	0	4	3	21	0	7	9	0	26	0	12	0	3	0	13	1	7964874752	-130305040	478297	0	0
	3	107	1	4	5	10	3	4	10	1	28	0	5	1	6	0	16	176	8471301120	-158508672	463785	0	0
	2	115	0	4	6	1	5	3	14	0	15	1	5	1	2	1	4	188	9088742400	-818862272	530473	0	0
	2	175	1	4	4	18	1	6	1	3	12	0	10	0	8	0	8	103	9118532608	-164047712	463781	0	0
	3	126	4	1	6	6	8	2	8	3	14	0	0	9	8	0	17	155	9254714368	-475429824	485818	0	0
	2	118	1	4	5	4	9	2	4	4	0	0	9	1	8	0	0	178	9555511296	-639117248	493100	0	0
	3	147	4	1	6	0	6	4	2	5	17	0	3	2	8	0	19	20	9781493760	-980421184	521569	0	0
	2	142	1	3	4	18	0	7	1	0	12	0	12	0	8	0	7	56	8003916800	-140262400	472607	0	0
	2	175	1	4	4	18	1	6	0	3	12	0	11	0	8	0	8	97	9082134528	-162317120	464592	0	0
	4	66	0	5	5	3	0	5	5	1	8	1	4	1	8	0	19	171	8444333568	-244438112	470338	0	0
	4	66	0	5	5	3	0	5	5	1	8	1	4	1	8	0	19	171	8444333568	-244438112	470338	0	0
	2	142	1	4	4	18	0	7	1	3	12	0	12	0	8	0	8	99	8988647424	-153012608	466867	0	0
	2	174	0	4	3	7	2	4	9	3	21	0	4	2	1	0	6	110	9174932480	-539050240	486652	0	0
	1	144	0	4	3	7	2	4	9	3	22	0	4	2	1	0	7	158	9198851072	-543167360	482447	0	0
	4	72	0	5	5	3	0	5	5	1	8	1	3	1	8	0	19	96	8344052224	-224100416	481076	0	0
	2	118	1	4	6	5	9	2	4	4	0	0	9	1	8	0	0	183	9580937216	-556899520	491679	0	0
	3	107	1	4	4	9	4	4	10	1	28	0	5	1	6	0	15	172	8474243584	-157963664	462434	0	0
	3	107	1	4	5	10	3	4	10	1	28	0	5	1	6	0	16	176	8471301120	-158508672	463785	0	0
	3	158	1	4	4	5	1	4	11	0	15	1	1	5	5	0	0	113	8559324672	-581920512	498435	0	0
	2	175	1	4	4	18	0	7	0	3	12	0	11	0	8	0	8	99	8964012032	-162893984	464649	0	0
	2	142	1	3	4	18	0	7	1	0	12	0	12	0	8	0	7	56	8003916800	-140262400	472607	0	0
	2	115	0	4	6	1	5	4	14	0	14	1	4	1	1	0	4	188	8733989888	-889892544	510806	0	0
	4	112	0	5	3	5	1	4	11	0	15	1	1	4	5	0	0	108	8635243520	-607656704	505241	0	0
	4	66	0	5	5	3	0	5	5	1	8	1	4	1	8	0	19	171	8444333568	-244438112	470338	0	0
	4	66	0	5	5	3	0	5	5	1	8	1	4	1	8	0	19	171	8444333568	-244438112	470338	0	0
	4	116	0	5	4	5	1	4	11	0	15	1	1	4	5	0	1	112	8557602304	-583535424	498237	0	0
	2	175	1	4	4	18	0	7	0	3	12	0	11	0	8	0	8	99	8964012032	-162893984	464649	0	0
	4	94	2	2	2	13	2	3	4	2	24	0	4	1	8	0	16	144	8337319936	-159880976	470725	0	0
	3	129	0	4	4	5	1	4	11	0	15	1	1	4	5	0	1	117	8548750848	-573410688	500085	0	0
	2	175	1	3	4	18	0	7	0	0	12	0	12	0	8	0	7	56	8013721600	-150143776	470447	0	0
	1	117	1	4	5	1	5	3	14	0	15	1	4	1	1	0	4	188	9032635392	-824958848	530827	0	0
	2	140	1	4	4	3	9	2	3	4	0	1	9	1	8	0	0	162	9745884160	-734335232	500042	0	0
	1	103	1	4	5	5	8	3	3	4	0	0	8	1	8	0	0	115	9460428800	-549041664	496631	0	0
--------------------------------------------------
#Generation	No.	-->6
#Variable_vector	Fitness_vector	Constraint_violation	Overall_penalty
	3	160	0	4	3	21	0	7	8	0	25	0	12	0	3	0	15	37	7987076096	-141472224	472858	0	0
	2	147	4	1	6	0	6	4	2	5	17	0	3	2	8	0	19	20	9796712448	-979377600	521891	0	0
	2	176	1	4	3	13	1	4	0	3	12	0	10	0	8	0	8	99	8631272448	-301726048	469809	0	0
	0	170	2	2	1	1	4	4	10	3	15	0	3	2	6	0	19	49	9577745408	-897844416	519995	0	0
	3	163	0	4	3	21	0	7	9	0	25	0	12	0	3	0	14	1	7964870656	-130305736	478297	0	0
	1	202	2	2	5	4	0	8	6	1	16	0	14	0	6	0	5	0	8224205824	-175547360	486282	0	0
	0	169	2	2	0	1	4	4	10	3	15	0	3	2	6	0	19	49	9582676992	-908478336	520790	0	0
	3	107	1	4	5	10	2	5	10	1	28	0	5	1	6	0	16	176	8400611840	-158508672	463794	0	0
	2	117	1	4	4	3	9	2	3	4	0	1	8	1	8	0	1	159	9745950720	-724272896	502485	0	0
	2	175	1	4	4	18	1	6	0	3	12	0	10	0	8	0	9	103	9085717504	-163990368	463807	0	0
	2	175	1	4	4	18	0	7	0	3	12	0	11	0	8	0	8	99	8964012032	-162893984	464649	0	0
	1	202	2	2	5	4	0	8	6	1	16	0	14	0	6	0	5	0	8224205824	-175547360	486282	0	0
	4	116	0	5	4	5	1	4	11	0	15	1	1	4	5	0	1	112	8557602304	-583535424	498237	0	0
	4	78	0	5	5	3	0	5	5	1	10	1	3	1	8	0	19	145	8369693184	-245890464	471913	0	0
	3	163	0	4	3	21	0	7	9	0	26	0	12	0	3	0	13	1	7964874752	-130305040	478297	0	0
	2	175	1	4	4	18	1	6	1	3	12	0	10	0	8	0	8	103	9118532608	-164047712	463781	0	0
	3	126	4	1	6	6	8	2	8	3	14	0	0	9	8	0	17	155	9254714368	-475429824	485818	0	0
	2	118	1	4	5	4	9	2	4	4	0	0	9	1	8	0	0	178	9555511296	-639117248	493100	0	0
	3	147	4	1	6	0	6	4	2	5	17	0	3	2	8	0	19	20	9781493760	-980421184	521569	0	0
	2	142	1	3	4	18	0	7	1	0	12	0	12	0	8	0	7	56	8003916800	-140262400	472607	0	0
	2	174	0	4	3	7	2	4	9	3	21	0	4	2	1	0	6	110	9174932480	-539050240	486652	0	0
	1	144	0	4	3	7	2	4	9	3	22	0	4	2	1	0	7	158	9198851072	-543167360	482447	0	0
	4	72	0	5	5	3	0	5	5	1	8	1	3	1	8	0	19	96	8344052224	-224100416	481076	0	0
	2	118	1	4	6	5	9	2	4	4	0	0	9	1	8	0	0	183	9580937216	-556899520	491679	0	0
	3	107	1	4	4	9	4	4	10	1	28	0	5	1	6	0	15	172	8474243584	-157963664	462434	0	0
	2	175	1	4	4	18	0	7	0	3	12	0	11	0	8	0	8	99	8964012032	-162893984	464649	0	0
	2	142	1	3	4	18	0	7	1	0	12	0	12	0	8	0	7	56	8003916800	-140262400	472607	0	0
	2	115	0	4	6	1	5	4	14	0	14	1	4	1	1	0	4	188	8733989888	-889892544	510806	0	0
	4	112	0	5	3	5	1	4	11	0	15	1	1	4	5	0	0	108	8635243520	-607656704	505241	0	0
	4	116	0	5	4	5	1	4	11	0	15	1	1	4	5	0	1	112	8557602304	-583535424	498237	0	0
	2	175	1	4	4	18	0	7	0	3	12	0	11	0	8	0	8	99	8964012032	-162893984	464649	0	0
	4	94	2	2	2	13	2	3	4	2	24	0	4	1	8	0	16	144	8337319936	-159880976	470725	0	0
	3	129	0	4	4	5	1	4	11	0	15	1	1	4	5	0	1	117	8548750848	-573410688	500085	0	0
	2	175	1	3	4	18	0	7	0	0	12	0	12	0	8	0	7	56	8013721600	-150143776	470447	0	0
	1	117	1	4	5	1	5	3	14	0	15	1	4	1	1	0	4	188	9032635392	-824958848	530827	0	0
	2	140	1	4	4	3	9	2	3	4	0	1	9	1	8	0	0	162	9745884160	-734335232	500042	0	0
	3	118	0	4	4	4	9	2	4	4	0	0	9	1	8	0	0	178	9551382528	-668958464	493778	0	0
	4	67	0	5	5	3	0	5	5	1	8	1	4	1	8	0	19	171	8438957568	-245521952	470062	0	0
	2	118	1	4	5	4	9	2	4	4	0	0	9	1	8	0	0	112	9522146304	-621990464	501131	0	0
	3	110	1	4	4	11	3	4	10	1	29	0	5	1	6	0	16	176	8464406528	-160308768	461114	0	0
	3	107	1	4	5	9	3	4	11	1	29	0	5	1	6	0	17	174	8475637248	-158579520	460995	0	0
	2	175	1	3	4	18	0	7	0	0	12	0	13	0	8	0	7	56	8013721600	-150143776	470447	0	0
	2	175	1	4	3	13	0	4	0	3	12	0	12	0	8	0	9	97	8481042432	-298907072	471161	0	0
	2	175	1	4	4	18	0	7	0	3	12	0	11	0	8	0	9	102	8965923840	-163702560	464271	0	0
	2	140	1	4	4	3	9	2	3	4	0	1	8	1	8	0	0	159	9717841920	-733556736	500408	0	0
	3	142	4	1	6	2	6	4	2	5	17	0	3	2	8	0	19	20	9704858624	-763426368	508049	0	0
	3	107	1	4	5	10	2	5	10	1	28	0	5	1	6	0	16	176	8400611840	-158508672	463794	0	0
	4	67	0	5	5	3	0	5	4	1	8	1	4	1	8	0	19	171	8436798976	-269691968	470583	0	0
	1	144	0	4	2	6	2	4	9	3	22	0	4	2	1	1	6	158	9323532288	-619658240	494777	0	0
	0	117	0	4	3	7	1	4	9	3	22	0	4	2	1	0	8	159	9362202624	-520593248	482303	0	0
--------------------------------------------------
#Generation	No.	-->7
#Variable_vector	Fitness_vector	Constraint_violation	Overall_penalty
	3	160	0	4	3	21	0	7	8	0	25	0	12	0	3	0	15	37	7987076096	-141472224	472858	0	0
	2	147	4	1	6	0	6	4	2	5	17	0	3	2	8	0	19	20	9796712448	-979377600	521891	0	0
	2	176	1	4	3	13	1	4	0	3	12	0	10	0	8	0	8	99	8631272448	-301726048	469809	0	0
	0	170	2	2	1	1	4	4	10	3	15	0	3	2	6	0	19	49	9577745408	-897844416	519995	0	0
	3	163	0	4	3	21	0	7	9	0	25	0	12	0	3	0	14	1	7964870656	-130305736	478297	0	0
	1	202	2	2	5	4	0	8	6	1	16	0	14	0	6	0	5	0	8224205824	-175547360	486282	0	0
	0	169	2	2	0	1	4	4	10	3	15	0	3	2	6	0	19	49	9582676992	-908478336	520790	0	0
	3	107	1	4	5	10	2	5	10	1	28	0	5	1	6	0	16	176	8400611840	-158508672	463794	0	0
	2	175	1	4	4	18	1	6	0	3	12	0	10	0	8	0	9	103	9085717504	-163990368	463807	0	0
	2	175	1	4	4	18	0	7	0	3	12	0	11	0	8	0	8	99	8964012032	-162893984	464649	0	0
	1	202	2	2	5	4	0	8	6	1	16	0	14	0	6	0	5	0	8224205824	-175547360	486282	0	0
	4	116	0	5	4	5	1	4	11	0	15	1	1	4	5	0	1	112	8557602304	-583535424	498237	0	0
	4	78	0	5	5	3	0	5	5	1	10	1	3	1	8	0	19	145	8369693184	-245890464	471913	0	0
	2	175	1	4	4	18	1	6	1	3	12	0	10	0	8	0	8	103	9118532608	-164047712	463781	0	0
	3	147	4	1	6	0	6	4	2	5	17	0	3	2	8	0	19	20	9781493760	-980421184	521569	0	0
	2	142	1	3	4	18	0	7	1	0	12	0	12	0	8	0	7	56	8003916800	-140262400	472607	0	0
	2	174	0	4	3	7	2	4	9	3	21	0	4	2	1	0	6	110	9174932480	-539050240	486652	0	0
	1	144	0	4	3	7	2	4	9	3	22	0	4	2	1	0	7	158	9198851072	-543167360	482447	0	0
	2	118	1	4	6	5	9	2	4	4	0	0	9	1	8	0	0	183	9580937216	-556899520	491679	0	0
	2	175	1	4	4	18	0	7	0	3	12	0	11	0	8	0	8	99	8964012032	-162893984	464649	0	0
	2	142	1	3	4	18	0	7	1	0	12	0	12	0	8	0	7	56	8003916800	-140262400	472607	0	0
	2	115	0	4	6	1	5	4	14	0	14	1	4	1	1	0	4	188	8733989888	-889892544	510806	0	0
	4	116	0	5	4	5	1	4	11	0	15	1	1	4	5	0	1	112	8557602304	-583535424	498237	0	0
	2	175	1	4	4	18	0	7	0	3	12	0	11	0	8	0	8	99	8964012032	-162893984	464649	0	0
	4	94	2	2	2	13	2	3	4	2	24	0	4	1	8	0	16	144	8337319936	-159880976	470725	0	0
	2	175	1	3	4	18	0	7	0	0	12	0	12	0	8	0	7	56	8013721600	-150143776	470447	0	0
	2	140	1	4	4	3	9	2	3	4	0	1	9	1	8	0	0	162	9745884160	-734335232	500042	0	0
	3	118	0	4	4	4	9	2	4	4	0	0	9	1	8	0	0	178	9551382528	-668958464	493778	0	0
	4	67	0	5	5	3	0	5	5	1	8	1	4	1	8	0	19	171	8438957568	-245521952	470062	0	0
	3	110	1	4	4	11	3	4	10	1	29	0	5	1	6	0	16	176	8464406528	-160308768	461114	0	0
	2	175	1	3	4	18	0	7	0	0	12	0	13	0	8	0	7	56	8013721600	-150143776	470447	0	0
	2	175	1	4	3	13	0	4	0	3	12	0	12	0	8	0	9	97	8481042432	-298907072	471161	0	0
	2	175	1	4	4	18	0	7	0	3	12	0	11	0	8	0	9	102	8965923840	-163702560	464271	0	0
	2	140	1	4	4	3	9	2	3	4	0	1	8	1	8	0	0	159	9717841920	-733556736	500408	0	0
	3	142	4	1	6	2	6	4	2	5	17	0	3	2	8	0	19	20	9704858624	-763426368	508049	0	0
	3	107	1	4	5	10	2	5	10	1	28	0	5	1	6	0	16	176	8400611840	-158508672	463794	0	0
	4	67	0	5	5	3	0	5	4	1	8	1	4	1	8	0	19	171	8436798976	-269691968	470583	0	0
	0	117	0	4	3	7	1	4	9	3	22	0	4	2	1	0	8	159	9362202624	-520593248	482303	0	0
	3	107	1	4	5	9	3	4	11	1	29	0	4	0	6	0	17	174	8403938816	-158579520	460995	0	0
	2	175	1	4	4	18	0	7	0	3	12	0	12	0	8	0	8	99	8964012032	-162893984	464649	0	0
	4	79	0	4	5	3	0	5	6	1	10	1	3	1	8	0	19	130	8336826880	-214302464	471782	0	0
	1	144	0	4	2	6	2	4	8	3	22	0	4	2	0	0	7	159	9181351936	-619863936	494026	0	0
	3	122	0	4	5	4	9	2	4	4	0	0	9	1	8	0	0	178	9538063360	-642317952	492410	0	0
	3	159	0	4	3	20	0	7	9	0	25	0	12	0	3	0	14	1	7948854272	-134437056	479293	0	0
	3	160	0	4	3	21	0	7	8	0	25	0	12	0	3	0	15	37	7987076096	-141472224	472858	0	0
	4	105	0	5	3	5	2	5	11	0	15	1	0	10	5	0	0	108	8533145600	-640705152	498490	0	0
	4	91	0	5	5	3	0	5	5	1	7	1	3	1	8	0	19	129	8281374720	-249640640	472028	0	0
	2	175	1	4	4	18	1	6	0	3	12	0	11	0	8	0	9	102	9085157376	-163702560	463943	0	0
	3	160	0	4	3	21	0	7	8	0	25	0	12	0	3	0	15	37	7987076096	-141472224	472858	0	0
	2	175	1	4	4	18	0	7	0	3	12	0	11	0	8	0	8	99	8964012032	-162893984	464649	0	0
--------------------------------------------------
#Generation	No.	-->8
#Variable_vector	Fitness_vector	Constraint_violation	Overall_penalty
	2	176	1	4	3	13	1	4	0	3	12	0	10	0	8	0	8	99	8631272448	-301726048	469809	0	0
	0	170	2	2	1	1	4	4	10	3	15	0	3	2	6	0	19	49	9577745408	-897844416	519995	0	0
	1	202	2	2	5	4	0	8	6	1	16	0	14	0	6	0	5	0	8224205824	-175547360	486282	0	0
	0	169	2	2	0	1	4	4	10	3	15	0	3	2	6	0	19	49	9582676992	-908478336	520790	0	0
	3	107	1	4	5	10	2	5	10	1	28	0	5	1	6	0	16	176	8400611840	-158508672	463794	0	0
	2	175	1	4	4	18	1	6	0	3	12	0	10	0	8	0	9	103	9085717504	-163990368	463807	0	0
	1	202	2	2	5	4	0	8	6	1	16	0	14	0	6	0	5	0	8224205824	-175547360	486282	0	0
	4	116	0	5	4	5	1	4	11	0	15	1	1	4	5	0	1	112	8557602304	-583535424	498237	0	0
	4	78	0	5	5	3	0	5	5	1	10	1	3	1	8	0	19	145	8369693184	-245890464	471913	0	0
	2	175	1	4	4	18	1	6	1	3	12	0	10	0	8	0	8	103	9118532608	-164047712	463781	0	0
	3	147	4	1	6	0	6	4	2	5	17	0	3	2	8	0	19	20	9781493760	-980421184	521569	0	0
	2	174	0	4	3	7	2	4	9	3	21	0	4	2	1	0	6	110	9174932480	-539050240	486652	0	0
	1	144	0	4	3	7	2	4	9	3	22	0	4	2	1	0	7	158	9198851072	-543167360	482447	0	0
	2	115	0	4	6	1	5	4	14	0	14	1	4	1	1	0	4	188	8733989888	-889892544	510806	0	0
	4	116	0	5	4	5	1	4	11	0	15	1	1	4	5	0	1	112	8557602304	-583535424	498237	0	0
	2	175	1	4	4	18	0	7	0	3	12	0	11	0	8	0	8	99	8964012032	-162893984	464649	0	0
	4	94	2	2	2	13	2	3	4	2	24	0	4	1	8	0	16	144	8337319936	-159880976	470725	0	0
	2	175	1	3	4	18	0	7	0	0	12	0	12	0	8	0	7	56	8013721600	-150143776	470447	0	0
	2	140	1	4	4	3	9	2	3	4	0	1	9	1	8	0	0	162	9745884160	-734335232	500042	0	0
	4	67	0	5	5	3	0	5	5	1	8	1	4	1	8	0	19	171	8438957568	-245521952	470062	0	0
	3	110	1	4	4	11	3	4	10	1	29	0	5	1	6	0	16	176	8464406528	-160308768	461114	0	0
	2	175	1	3	4	18	0	7	0	0	12	0	13	0	8	0	7	56	8013721600	-150143776	470447	0	0
	2	175	1	4	3	13	0	4	0	3	12	0	12	0	8	0	9	97	8481042432	-298907072	471161	0	0
	2	175	1	4	4	18	0	7	0	3	12	0	11	0	8	0	9	102	8965923840	-163702560	464271	0	0
	2	140	1	4	4	3	9	2	3	4	0	1	8	1	8	0	0	159	9717841920	-733556736	500408	0	0
	3	142	4	1	6	2	6	4	2	5	17	0	3	2	8	0	19	20	9704858624	-763426368	508049	0	0
	3	107	1	4	5	10	2	5	10	1	28	0	5	1	6	0	16	176	8400611840	-158508672	463794	0	0
	4	67	0	5	5	3	0	5	4	1	8	1	4	1	8	0	19	171	8436798976	-269691968	470583	0	0
	0	117	0	4	3	7	1	4	9	3	22	0	4	2	1	0	8	159	9362202624	-520593248	482303	0	0
	3	107	1	4	5	9	3	4	11	1	29	0	4	0	6	0	17	174	8403938816	-158579520	460995	0	0
	2	175	1	4	4	18	0	7	0	3	12	0	12	0	8	0	8	99	8964012032	-162893984	464649	0	0
	4	79	0	4	5	3	0	5	6	1	10	1	3	1	8	0	19	130	8336826880	-214302464	471782	0	0
	1	144	0	4	2	6	2	4	8	3	22	0	4	2	0	0	7	159	9181351936	-619863936	494026	0	0
	3	159	0	4	3	20	0	7	9	0	25	0	12	0	3	0	14	1	7948854272	-134437056	479293	0	0
	4	105	0	5	3	5	2	5	11	0	15	1	0	10	5	0	0	108	8533145600	-640705152	498490	0	0
	4	91	0	5	5	3	0	5	5	1	7	1	3	1	8	0	19	129	8281374720	-249640640	472028	0	0
	2	175	1	4	4	18	1	6	0	3	12	0	11	0	8	0	9	102	9085157376	-163702560	463943	0	0
	2	175	1	4	4	18	0	7	0	3	12	0	11	0	8	0	8	99	8964012032	-162893984	464649	0	0
	4	117	1	3	3	20	0	7	9	0	25	0	12	0	3	0	15	42	7973526528	-149457376	472317	0	0
	2	107	1	4	5	6	2	5	11	1	28	0	5	1	6	0	15	143	8309449728	-148293712	466479	0	0
	3	119	0	4	4	4	9	2	4	4	0	0	9	1	8	0	0	178	9549812736	-669433280	493650	0	0
	1	144	1	4	2	6	3	4	8	3	22	0	4	2	0	0	6	158	9318785024	-650652032	488608	0	0
	1	144	0	4	2	5	2	4	9	3	23	0	4	2	1	0	7	158	9292477440	-654048000	499207	0	0
	4	78	0	5	5	5	0	5	5	1	11	1	3	1	8	0	19	145	8399238144	-191496672	468319	0	0
	3	163	0	4	3	21	0	7	9	0	25	0	12	0	3	0	14	1	7964870656	-130305736	478297	0	0
	3	142	4	1	6	2	6	4	2	5	17	0	3	2	8	0	19	20	9704858624	-763426368	508049	0	0
	4	94	2	2	2	13	2	3	4	2	24	0	4	1	8	0	16	144	8337319936	-159880976	470725	0	0
	2	175	1	4	3	13	0	4	0	3	12	0	12	0	8	0	9	97	8481042432	-298907072	471161	0	0
	2	115	0	4	6	1	5	4	14	0	14	1	4	1	1	0	4	188	8733989888	-889892544	510806	0	0
	4	67	0	5	5	3	0	5	4	1	8	1	4	1	8	0	19	171	8436798976	-269691968	470583	0	0
--------------------------------------------------
#Generation	No.	-->9
#Variable_vector	Fitness_vector	Constraint_violation	Overall_penalty
	2	176	1	4	3	13	1	4	0	3	12	0	10	0	8	0	8	99	8631272448	-301726048	469809	0	0
	0	170	2	2	1	1	4	4	10	3	15	0	3	2	6	0	19	49	9577745408	-897844416	519995	0	0
	1	202	2	2	5	4	0	8	6	1	16	0	14	0	6	0	5	0	8224205824	-175547360	486282	0	0
	0	169	2	2	0	1	4	4	10	3	15	0	3	2	6	0	19	49	9582676992	-908478336	520790	0	0
	1	202	2	2	5	4	0	8	6	1	16	0	14	0	6	0	5	0	8224205824	-175547360	486282	0	0
	4	116	0	5	4	5	1	4	11	0	15	1	1	4	5	0	1	112	8557602304	-583535424	498237	0	0
	2	175	1	4	4	18	1	6	1	3	12	0	10	0	8	0	8	103	9118532608	-164047712	463781	0	0
	3	147	4	1	6	0	6	4	2	5	17	0	3	2	8	0	19	20	9781493760	-980421184	521569	0	0
	2	174	0	4	3	7	2	4	9	3	21	0	4	2	1	0	6	110	9174932480	-539050240	486652	0	0
	2	115	0	4	6	1	5	4	14	0	14	1	4	1	1	0	4	188	8733989888	-889892544	510806	0	0
	4	116	0	5	4	5	1	4	11	0	15	1	1	4	5	0	1	112	8557602304	-583535424	498237	0	0
	4	67	0	5	5	3	0	5	5	1	8	1	4	1	8	0	19	171	8438957568	-245521952	470062	0	0
	2	175	1	3	4	18	0	7	0	0	12	0	13	0	8	0	7	56	8013721600	-150143776	470447	0	0
	2	175	1	4	3	13	0	4	0	3	12	0	12	0	8	0	9	97	8481042432	-298907072	471161	0	0
	3	142	4	1	6	2	6	4	2	5	17	0	3	2	8	0	19	20	9704858624	-763426368	508049	0	0
	4	67	0	5	5	3	0	5	4	1	8	1	4	1	8	0	19	171	8436798976	-269691968	470583	0	0
	0	117	0	4	3	7	1	4	9	3	22	0	4	2	1	0	8	159	9362202624	-520593248	482303	0	0
	4	79	0	4	5	3	0	5	6	1	10	1	3	1	8	0	19	130	8336826880	-214302464	471782	0	0
	1	144	0	4	2	6	2	4	8	3	22	0	4	2	0	0	7	159	9181351936	-619863936	494026	0	0
	3	159	0	4	3	20	0	7	9	0	25	0	12	0	3	0	14	1	7948854272	-134437056	479293	0	0
	4	105	0	5	3	5	2	5	11	0	15	1	0	10	5	0	0	108	8533145600	-640705152	498490	0	0
	4	91	0	5	5	3	0	5	5	1	7	1	3	1	8	0	19	129	8281374720	-249640640	472028	0	0
	2	175	1	4	4	18	1	6	0	3	12	0	11	0	8	0	9	102	9085157376	-163702560	463943	0	0
	4	117	1	3	3	20	0	7	9	0	25	0	12	0	3	0	15	42	7973526528	-149457376	472317	0	0
	3	119	0	4	4	4	9	2	4	4	0	0	9	1	8	0	0	178	9549812736	-669433280	493650	0	0
	1	144	1	4	2	6	3	4	8	3	22	0	4	2	0	0	6	158	9318785024	-650652032	488608	0	0
	1	144	0	4	2	5	2	4	9	3	23	0	4	2	1	0	7	158	9292477440	-654048000	499207	0	0
	4	78	0	5	5	5	0	5	5	1	11	1	3	1	8	0	19	145	8399238144	-191496672	468319	0	0
	3	142	4	1	6	2	6	4	2	5	17	0	3	2	8	0	19	20	9704858624	-763426368	508049	0	0
	2	175	1	4	3	13	0	4	0	3	12	0	12	0	8	0	9	97	8481042432	-298907072	471161	0	0
	2	115	0	4	6	1	5	4	14	0	14	1	4	1	1	0	4	188	8733989888	-889892544	510806	0	0
	4	67	0	5	5	3	0	5	4	1	8	1	4	1	8	0	19	171	8436798976	-269691968	470583	0	0
	1	144	0	4	2	5	2	4	9	3	22	0	4	2	1	0	7	158	9292477440	-654048000	499207	0	0
	2	140	1	4	4	3	9	2	3	4	0	0	9	1	8	0	0	162	9499928576	-734335232	500042	0	0
	1	144	1	4	2	6	3	4	8	3	23	0	4	2	0	0	6	158	9318785024	-650652032	488608	0	0
	2	175	1	4	4	18	0	7	0	0	12	0	10	0	8	0	9	103	8052126720	-163990368	464135	0	0
	0	156	2	2	0	1	5	4	10	3	15	0	3	2	6	0	19	49	9624305664	-927908352	524136	0	0
	2	176	1	4	3	13	2	4	0	3	12	0	10	0	8	0	8	99	8571524096	-301922848	473328	0	0
	0	117	0	4	3	7	1	4	9	3	22	0	4	2	1	0	8	159	9362202624	-520593248	482303	0	0
	0	169	2	2	0	1	4	4	10	3	15	0	3	2	7	0	19	49	9582676992	-908478336	520790	0	0
	3	107	1	4	5	6	3	4	11	1	29	0	4	0	6	0	17	174	8319197184	-160873152	460792	0	0
	2	175	1	3	4	18	0	7	1	0	12	0	13	0	8	0	8	58	8015321088	-151068832	470013	0	0
	3	122	0	4	3	5	2	5	11	0	15	1	0	5	5	0	0	108	8415854592	-630777792	500399	0	0
	4	105	0	5	3	5	2	5	11	0	15	1	0	10	5	0	0	108	8533145600	-640705152	498490	0	0
	4	67	0	5	5	3	0	5	4	1	8	1	4	1	8	0	19	150	8418512384	-262450192	473980	0	0
	4	78	0	5	5	5	0	5	5	1	11	1	3	1	8	0	19	166	8414509568	-198738416	464923	0	0
	0	117	0	4	3	7	1	4	9	3	22	0	4	2	1	0	8	159	9362202624	-520593248	482303	0	0
	1	144	0	4	3	7	2	4	9	3	22	0	4	2	1	0	6	158	9198529536	-543243776	482411	0	0
	4	67	0	5	5	3	0	5	5	1	8	1	4	1	8	0	19	171	8438957568	-245521952	470062	0	0
	1	202	2	2	5	4	0	8	6	1	16	0	14	0	6	0	5	0	8224205824	-175547360	486282	0	0
--------------------------------------------------
#Generation	No.	-->10
#Variable_vector	Fitness_vector	Constraint_violation	Overall_penalty
	2	176	1	4	3	13	1	4	0	3	12	0	10	0	8	0	8	99	8631272448	-301726048	469809	0	0
	0	170	2	2	1	1	4	4	10	3	15	0	3	2	6	0	19	49	9577745408	-897844416	519995	0	0
	1	202	2	2	5	4	0	8	6	1	16	0	14	0	6	0	5	0	8224205824	-175547360	486282	0	0
	0	169	2	2	0	1	4	4	10	3	15	0	3	2	6	0	19	49	9582676992	-908478336	520790	0	0
	1	202	2	2	5	4	0	8	6	1	16	0	14	0	6	0	5	0	8224205824	-175547360	486282	0	0
	4	116	0	5	4	5	1	4	11	0	15	1	1	4	5	0	1	112	8557602304	-583535424	498237	0	0
	2	175	1	4	4	18	1	6	1	3	12	0	10	0	8	0	8	103	9118532608	-164047712	463781	0	0
	3	147	4	1	6	0	6	4	2	5	17	0	3	2	8	0	19	20	9781493760	-980421184	521569	0	0
	2	115	0	4	6	1	5	4	14	0	14	1	4	1	1	0	4	188	8733989888	-889892544	510806	0	0
	2	175	1	4	3	13	0	4	0	3	12	0	12	0	8	0	9	97	8481042432	-298907072	471161	0	0
	3	142	4	1	6	2	6	4	2	5	17	0	3	2	8	0	19	20	9704858624	-763426368	508049	0	0
	4	79	0	4	5	3	0	5	6	1	10	1	3	1	8	0	19	130	8336826880	-214302464	471782	0	0
	3	159	0	4	3	20	0	7	9	0	25	0	12	0	3	0	14	1	7948854272	-134437056	479293	0	0
	4	91	0	5	5	3	0	5	5	1	7	1	3	1	8	0	19	129	8281374720	-249640640	472028	0	0
	2	175	1	4	4	18	1	6	0	3	12	0	11	0	8	0	9	102	9085157376	-163702560	463943	0	0
	4	117	1	3	3	20	0	7	9	0	25	0	12	0	3	0	15	42	7973526528	-149457376	472317	0	0
	3	119	0	4	4	4	9	2	4	4	0	0	9	1	8	0	0	178	9549812736	-669433280	493650	0	0
	1	144	0	4	2	5	2	4	9	3	23	0	4	2	1	0	7	158	9292477440	-654048000	499207	0	0
	4	78	0	5	5	5	0	5	5	1	11	1	3	1	8	0	19	145	8399238144	-191496672	468319	0	0
	3	142	4	1	6	2	6	4	2	5	17	0	3	2	8	0	19	20	9704858624	-763426368	508049	0	0
	2	115	0	4	6	1	5	4	14	0	14	1	4	1	1	0	4	188	8733989888	-889892544	510806	0	0
	4	67	0	5	5	3	0	5	4	1	8	1	4	1	8	0	19	171	8436798976	-269691968	470583	0	0
	1	144	0	4	2	5	2	4	9	3	22	0	4	2	1	0	7	158	9292477440	-654048000	499207	0	0
	2	140	1	4	4	3	9	2	3	4	0	0	9	1	8	0	0	162	9499928576	-734335232	500042	0	0
	2	175	1	4	4	18	0	7	0	0	12	0	10	0	8	0	9	103	8052126720	-163990368	464135	0	0
	0	156	2	2	0	1	5	4	10	3	15	0	3	2	6	0	19	49	9624305664	-927908352	524136	0	0
	2	176	1	4	3	13	2	4	0	3	12	0	10	0	8	0	8	99	8571524096	-301922848	473328	0	0
	0	117	0	4	3	7	1	4	9	3	22	0	4	2	1	0	8	159	9362202624	-520593248	482303	0	0
	3	107	1	4	5	6	3	4	11	1	29	0	4	0	6	0	17	174	8319197184	-160873152	460792	0	0
	2	175	1	3	4	18	0	7	1	0	12	0	13	0	8	0	8	58	8015321088	-151068832	470013	0	0
	3	122	0	4	3	5	2	5	11	0	15	1	0	5	5	0	0	108	8415854592	-630777792	500399	0	0
	4	67	0	5	5	3	0	5	4	1	8	1	4	1	8	0	19	150	8418512384	-262450192	473980	0	0
	4	78	0	5	5	5	0	5	5	1	11	1	3	1	8	0	19	166	8414509568	-198738416	464923	0	0
	0	117	0	4	3	7	1	4	9	3	22	0	4	2	1	0	8	159	9362202624	-520593248	482303	0	0
	1	144	0	4	3	7	2	4	9	3	22	0	4	2	1	0	6	158	9198529536	-543243776	482411	0	0
	4	67	0	5	5	3	0	5	5	1	8	1	4	1	8	0	19	171	8438957568	-245521952	470062	0	0
	1	144	1	4	2	5	2	5	9	3	22	0	4	2	1	0	6	157	9363490816	-690604928	494218	0	0
	2	175	1	4	3	13	2	3	0	3	12	0	10	0	8	0	8	99	8421006336	-298225536	471343	0	0
	2	176	1	4	3	13	0	5	0	3	12	0	12	0	8	0	9	97	8610824192	-301343776	472663	0	0
	1	144	0	4	3	7	2	4	9	3	22	0	4	2	1	0	6	158	9198529536	-543243776	482411	0	0
	2	174	0	4	3	7	2	4	9	3	21	0	4	2	1	0	6	105	9172202496	-537636864	487315	0	0
	4	116	0	5	4	5	1	4	11	0	15	1	1	4	6	0	1	117	8560179712	-584861184	497615	0	0
	1	144	0	4	2	6	2	4	8	3	22	0	4	2	0	0	6	158	9180479488	-619658240	494123	0	0
	1	144	1	4	2	6	2	5	8	3	23	0	4	2	0	0	7	159	9264217088	-647717056	490215	0	0
	4	78	0	5	5	5	0	5	4	0	11	1	3	1	8	0	19	145	8318340096	-559368192	489824	0	0
	4	105	0	5	3	5	2	5	12	0	15	1	1	5	5	0	0	108	8435499008	-640705152	498265	0	0
	1	202	2	2	5	4	0	8	6	1	16	0	15	0	6	0	5	23	8236567552	-181907296	483301	0	0
	4	78	0	5	4	3	0	5	5	1	11	1	3	1	8	0	19	145	8378792448	-258274576	471790	0	0
	1	143	1	4	5	5	9	2	3	4	0	0	9	1	8	0	0	162	9451090944	-581854400	488439	0	0
	1	144	1	4	2	6	3	4	8	3	22	0	3	2	0	0	6	158	9273803776	-650652032	488607	0	0
--------------------------------------------------
#Generation	No.	-->11
#Variable_vector	Fitness_vector	Constraint_violation	Overall_penalty
	2	176	1	4	3	13	1	4	0	3	12	0	10	0	8	0	8	99	8631272448	-301726048	469809	0	0
	0	170	2	2	1	1	4	4	10	3	15	0	3	2	6	0	19	49	9577745408	-897844416	519995	0	0
	1	202	2	2	5	4	0	8	6	1	16	0	14	0	6	0	5	0	8224205824	-175547360	486282	0	0
	0	169	2	2	0	1	4	4	10	3	15	0	3	2	6	0	19	49	9582676992	-908478336	520790	0	0
	4	116	0	5	4	5	1	4	11	0	15	1	1	4	5	0	1	112	8557602304	-583535424	498237	0	0
	2	175	1	4	4	18	1	6	1	3	12	0	10	0	8	0	8	103	9118532608	-164047712	463781	0	0
	3	147	4	1	6	0	6	4	2	5	17	0	3	2	8	0	19	20	9781493760	-980421184	521569	0	0
	2	115	0	4	6	1	5	4	14	0	14	1	4	1	1	0	4	188	8733989888	-889892544	510806	0	0
	2	175	1	4	3	13	0	4	0	3	12	0	12	0	8	0	9	97	8481042432	-298907072	471161	0	0
	3	142	4	1	6	2	6	4	2	5	17	0	3	2	8	0	19	20	9704858624	-763426368	508049	0	0
	4	79	0	4	5	3	0	5	6	1	10	1	3	1	8	0	19	130	8336826880	-214302464	471782	0	0
	3	159	0	4	3	20	0	7	9	0	25	0	12	0	3	0	14	1	7948854272	-134437056	479293	0	0
	4	117	1	3	3	20	0	7	9	0	25	0	12	0	3	0	15	42	7973526528	-149457376	472317	0	0
	3	119	0	4	4	4	9	2	4	4	0	0	9	1	8	0	0	178	9549812736	-669433280	493650	0	0
	4	78	0	5	5	5	0	5	5	1	11	1	3	1	8	0	19	145	8399238144	-191496672	468319	0	0
	3	142	4	1	6	2	6	4	2	5	17	0	3	2	8	0	19	20	9704858624	-763426368	508049	0	0
	2	115	0	4	6	1	5	4	14	0	14	1	4	1	1	0	4	188	8733989888	-889892544	510806	0	0
	4	67	0	5	5	3	0	5	4	1	8	1	4	1	8	0	19	171	8436798976	-269691968	470583	0	0
	2	140	1	4	4	3	9	2	3	4	0	0	9	1	8	0	0	162	9499928576	-734335232	500042	0	0
	2	175	1	4	4	18	0	7	0	0	12	0	10	0	8	0	9	103	8052126720	-163990368	464135	0	0
	2	176	1	4	3	13	2	4	0	3	12	0	10	0	8	0	8	99	8571524096	-301922848	473328	0	0
	0	117	0	4	3	7	1	4	9	3	22	0	4	2	1	0	8	159	9362202624	-520593248	482303	0	0
	3	107	1	4	5	6	3	4	11	1	29	0	4	0	6	0	17	174	8319197184	-160873152	460792	0	0
	2	175	1	3	4	18	0	7	1	0	12	0	13	0	8	0	8	58	8015321088	-151068832	470013	0	0
	3	122	0	4	3	5	2	5	11	0	15	1	0	5	5	0	0	108	8415854592	-630777792	500399	0	0
	4	78	0	5	5	5	0	5	5	1	11	1	3	1	8	0	19	166	8414509568	-198738416	464923	0	0
	0	117	0	4	3	7	1	4	9	3	22	0	4	2	1	0	8	159	9362202624	-520593248	482303	0	0
	4	67	0	5	5	3	0	5	5	1	8	1	4	1	8	0	19	171	8438957568	-245521952	470062	0	0
	1	144	1	4	2	5	2	5	9	3	22	0	4	2	1	0	6	157	9363490816	-690604928	494218	0	0
	2	176	1	4	3	13	0	5	0	3	12	0	12	0	8	0	9	97	8610824192	-301343776	472663	0	0
	2	174	0	4	3	7	2	4	9	3	21	0	4	2	1	0	6	105	9172202496	-537636864	487315	0	0
	4	116	0	5	4	5	1	4	11	0	15	1	1	4	6	0	1	117	8560179712	-584861184	497615	0	0
	1	144	1	4	2	6	2	5	8	3	23	0	4	2	0	0	7	159	9264217088	-647717056	490215	0	0
	4	78	0	5	5	5	0	5	4	0	11	1	3	1	8	0	19	145	8318340096	-559368192	489824	0	0
	4	105	0	5	3	5	2	5	12	0	15	1	1	5	5	0	0	108	8435499008	-640705152	498265	0	0
	1	202	2	2	5	4	0	8	6	1	16	0	15	0	6	0	5	23	8236567552	-181907296	483301	0	0
	4	78	0	5	4	3	0	5	5	1	11	1	3	1	8	0	19	145	8378792448	-258274576	471790	0	0
	1	143	1	4	5	5	9	2	3	4	0	0	9	1	8	0	0	162	9451090944	-581854400	488439	0	0
	1	144	1	4	2	6	3	4	8	3	22	0	3	2	0	0	6	158	9273803776	-650652032	488607	0	0
	4	91	0	5	5	3	0	5	5	1	6	1	3	1	8	0	19	130	8279661056	-249985472	471881	0	0
	4	78	0	5	4	3	0	5	4	1	11	1	3	1	8	0	19	152	8381944832	-286290880	470968	0	0
	4	78	0	5	5	5	0	5	5	1	11	1	3	1	8	0	18	161	8407783936	-196182112	466121	0	0
	1	144	0	4	2	5	2	4	9	3	22	0	4	2	1	0	6	158	9292155904	-654124352	499171	0	0
	1	144	0	4	2	8	2	4	9	3	22	0	4	2	1	0	7	158	9246603264	-548931200	488372	0	0
	1	144	0	4	2	6	2	4	7	3	22	0	4	2	0	0	6	158	9111878656	-619658240	493217	0	0
	4	67	0	5	5	3	0	5	5	1	8	1	4	1	8	0	19	171	8438957568	-245521952	470062	0	0
	0	156	2	2	0	1	5	4	9	3	15	0	3	2	6	0	19	49	9553355776	-927908352	523660	0	0
	2	175	1	4	4	18	1	6	0	3	12	0	11	0	8	0	8	102	9084914688	-163759264	463916	0	0
	3	107	1	4	5	6	3	4	11	1	29	0	4	0	6	0	17	174	8319197184	-160873152	460792	0	0
	1	202	2	2	5	4	0	8	6	1	16	0	14	0	6	0	6	18	8234035712	-180635648	483897	0	0
--------------------------------------------------
#Generation	No.	-->12
#Variable_vector	Fitness_vector	Constraint_violation	Overall_penalty
	2	176	1	4	3	13	1	4	0	3	12	0	10	0	8	0	8	99	8631272448	-301726048	469809	0	0
	0	170	2	2	1	1	4	4	10	3	15	0	3	2	6	0	19	49	9577745408	-897844416	519995	0	0
	1	202	2	2	5	4	0	8	6	1	16	0	14	0	6	0	5	0	8224205824	-175547360	486282	0	0
	0	169	2	2	0	1	4	4	10	3	15	0	3	2	6	0	19	49	9582676992	-908478336	520790	0	0
	4	116	0	5	4	5	1	4	11	0	15	1	1	4	5	0	1	112	8557602304	-583535424	498237	0	0
	2	175	1	4	4	18	1	6	1	3	12	0	10	0	8	0	8	103	9118532608	-164047712	463781	0	0
	3	147	4	1	6	0	6	4	2	5	17	0	3	2	8	0	19	20	9781493760	-980421184	521569	0	0
	2	115	0	4	6	1	5	4	14	0	14	1	4	1	1	0	4	188	8733989888	-889892544	510806	0	0
	2	175	1	4	3	13	0	4	0	3	12	0	12	0	8	0	9	97	8481042432	-298907072	471161	0	0
	3	142	4	1	6	2	6	4	2	5	17	0	3	2	8	0	19	20	9704858624	-763426368	508049	0	0
	4	79	0	4	5	3	0	5	6	1	10	1	3	1	8	0	19	130	8336826880	-214302464	471782	0	0
	3	159	0	4	3	20	0	7	9	0	25	0	12	0	3	0	14	1	7948854272	-134437056	479293	0	0
	4	117	1	3	3	20	0	7	9	0	25	0	12	0	3	0	15	42	7973526528	-149457376	472317	0	0
	3	119	0	4	4	4	9	2	4	4	0	0	9	1	8	0	0	178	9549812736	-669433280	493650	0	0
	4	78	0	5	5	5	0	5	5	1	11	1	3	1	8	0	19	145	8399238144	-191496672	468319	0	0
	2	115	0	4	6	1	5	4	14	0	14	1	4	1	1	0	4	188	8733989888	-889892544	510806	0	0
	2	140	1	4	4	3	9	2	3	4	0	0	9	1	8	0	0	162	9499928576	-734335232	500042	0	0
	2	175	1	4	4	18	0	7	0	0	12	0	10	0	8	0	9	103	8052126720	-163990368	464135	0	0
	0	117	0	4	3	7	1	4	9	3	22	0	4	2	1	0	8	159	9362202624	-520593248	482303	0	0
	3	107	1	4	5	6	3	4	11	1	29	0	4	0	6	0	17	174	8319197184	-160873152	460792	0	0
	2	175	1	3	4	18	0	7	1	0	12	0	13	0	8	0	8	58	8015321088	-151068832	470013	0	0
	4	78	0	5	5	5	0	5	5	1	11	1	3	1	8	0	19	166	8414509568	-198738416	464923	0	0
	0	117	0	4	3	7	1	4	9	3	22	0	4	2	1	0	8	159	9362202624	-520593248	482303	0	0
	1	144	1	4	2	5	2	5	9	3	22	0	4	2	1	0	6	157	9363490816	-690604928	494218	0	0
	2	174	0	4	3	7	2	4	9	3	21	0	4	2	1	0	6	105	9172202496	-537636864	487315	0	0
	4	116	0	5	4	5	1	4	11	0	15	1	1	4	6	0	1	117	8560179712	-584861184	497615	0	0
	4	78	0	5	5	5	0	5	4	0	11	1	3	1	8	0	19	145	8318340096	-559368192	489824	0	0
	4	105	0	5	3	5	2	5	12	0	15	1	1	5	5	0	0	108	8435499008	-640705152	498265	0	0
	1	202	2	2	5	4	0	8	6	1	16	0	15	0	6	0	5	23	8236567552	-181907296	483301	0	0
	4	91	0	5	5	3	0	5	5	1	6	1	3	1	8	0	19	130	8279661056	-249985472	471881	0	0
	4	78	0	5	5	5	0	5	5	1	11	1	3	1	8	0	18	161	8407783936	-196182112	466121	0	0
	1	144	0	4	2	6	2	4	7	3	22	0	4	2	0	0	6	158	9111878656	-619658240	493217	0	0
	4	67	0	5	5	3	0	5	5	1	8	1	4	1	8	0	19	171	8438957568	-245521952	470062	0	0
	0	156	2	2	0	1	5	4	9	3	15	0	3	2	6	0	19	49	9553355776	-927908352	523660	0	0
	2	175	1	4	4	18	1	6	0	3	12	0	11	0	8	0	8	102	9084914688	-163759264	463916	0	0
	3	107	1	4	5	6	3	4	11	1	29	0	4	0	6	0	17	174	8319197184	-160873152	460792	0	0
	1	202	2	2	5	4	0	8	6	1	16	0	14	0	6	0	6	18	8234035712	-180635648	483897	0	0
	1	144	1	4	2	6	4	4	7	3	22	0	3	2	0	0	6	156	9241720832	-650357312	485144	0	0
	3	159	0	4	3	20	0	7	9	0	25	0	12	0	3	0	14	1	7948854272	-134437056	479293	0	0
	1	144	0	4	2	6	1	5	8	3	23	0	4	2	0	0	7	159	9327337472	-644901504	483664	0	0
	4	67	0	5	5	3	0	5	4	1	7	1	4	1	8	0	19	171	8404536832	-269691968	470531	0	0
	1	144	1	4	1	7	3	4	8	3	23	0	3	2	0	0	6	158	9260744704	-658593088	486827	0	0
	3	143	0	5	3	5	2	5	12	0	15	1	1	5	5	0	0	57	8399862784	-626150272	504690	0	0
	3	156	4	1	6	2	6	4	2	5	17	0	3	2	8	0	19	58	9731350528	-780936704	500925	0	0
	2	176	1	4	3	13	2	4	0	3	12	0	11	0	8	0	8	99	8571524096	-301922848	473328	0	0
	4	78	0	5	4	3	0	5	5	1	11	1	3	1	8	0	19	145	8378792448	-258274576	471790	0	0
	3	142	4	1	6	2	6	4	2	5	17	0	3	2	8	0	19	20	9704858624	-763426368	508049	0	0
	2	176	1	4	3	13	2	4	0	3	12	0	10	0	8	0	8	98	8570962432	-301634400	473463	0	0
	2	176	1	4	3	13	0	5	0	3	12	0	12	0	8	0	10	91	8610612224	-301868544	472417	0	0
	0	124	0	4	3	7	2	4	8	3	23	0	4	2	1	0	8	159	9212431360	-527987712	485933	0	0
--------------------------------------------------
#Generation	No.	-->13
#Variable_vector	Fitness_vector	Constraint_violation	Overall_penalty
	2	176	1	4	3	13	1	4	0	3	12	0	10	0	8	0	8	99	8631272448	-301726048	469809	0	0
	0	170	2	2	1	1	4	4	10	3	15	0	3	2	6	0	19	49	9577745408	-897844416	519995	0	0
	1	202	2	2	5	4	0	8	6	1	16	0	14	0	6	0	5	0	8224205824	-175547360	486282	0	0
	0	169	2	2	0	1	4	4	10	3	15	0	3	2	6	0	19	49	9582676992	-908478336	520790	0	0
	4	116	0	5	4	5	1	4	11	0	15	1	1	4	5	0	1	112	8557602304	-583535424	498237	0	0
	2	175	1	4	4	18	1	6	1	3	12	0	10	0	8	0	8	103	9118532608	-164047712	463781	0	0
	3	147	4	1	6	0	6	4	2	5	17	0	3	2	8	0	19	20	9781493760	-980421184	521569	0	0
	2	115	0	4	6	1	5	4	14	0	14	1	4	1	1	0	4	188	8733989888	-889892544	510806	0	0
	2	175	1	4	3	13	0	4	0	3	12	0	12	0	8	0	9	97	8481042432	-298907072	471161	0	0
	3	159	0	4	3	20	0	7	9	0	25	0	12	0	3	0	14	1	7948854272	-134437056	479293	0	0
	4	117	1	3	3	20	0	7	9	0	25	0	12	0	3	0	15	42	7973526528	-149457376	472317	0	0
	3	119	0	4	4	4	9	2	4	4	0	0	9	1	8	0	0	178	9549812736	-669433280	493650	0	0
	4	78	0	5	5	5	0	5	5	1	11	1	3	1	8	0	19	145	8399238144	-191496672	468319	0	0
	2	115	0	4	6	1	5	4	14	0	14	1	4	1	1	0	4	188	8733989888	-889892544	510806	0	0
	2	140	1	4	4	3	9	2	3	4	0	0	9	1	8	0	0	162	9499928576	-734335232	500042	0	0
	2	175	1	4	4	18	0	7	0	0	12	0	10	0	8	0	9	103	8052126720	-163990368	464135	0	0
	0	117	0	4	3	7	1	4	9	3	22	0	4	2	1	0	8	159	9362202624	-520593248	482303	0	0
	3	107	1	4	5	6	3	4	11	1	29	0	4	0	6	0	17	174	8319197184	-160873152	460792	0	0
	2	175	1	3	4	18	0	7	1	0	12	0	13	0	8	0	8	58	8015321088	-151068832	470013	0	0
	0	117	0	4	3	7	1	4	9	3	22	0	4	2	1	0	8	159	9362202624	-520593248	482303	0	0
	1	144	1	4	2	5	2	5	9	3	22	0	4	2	1	0	6	157	9363490816	-690604928	494218	0	0
	2	174	0	4	3	7	2	4	9	3	21	0	4	2	1	0	6	105	9172202496	-537636864	487315	0	0
	4	116	0	5	4	5	1	4	11	0	15	1	1	4	6	0	1	117	8560179712	-584861184	497615	0	0
	4	78	0	5	5	5	0	5	4	0	11	1	3	1	8	0	19	145	8318340096	-559368192	489824	0	0
	4	105	0	5	3	5	2	5	12	0	15	1	1	5	5	0	0	108	8435499008	-640705152	498265	0	0
	4	91	0	5	5	3	0	5	5	1	6	1	3	1	8	0	19	130	8279661056	-249985472	471881	0	0
	4	78	0	5	5	5	0	5	5	1	11	1	3	1	8	0	18	161	8407783936	-196182112	466121	0	0
	1	144	0	4	2	6	2	4	7	3	22	0	4	2	0	0	6	158	9111878656	-619658240	493217	0	0
	4	67	0	5	5	3	0	5	5	1	8	1	4	1	8	0	19	171	8438957568	-245521952	470062	0	0
	0	156	2	2	0	1	5	4	9	3	15	0	3	2	6	0	19	49	9553355776	-927908352	523660	0	0
	3	107	1	4	5	6	3	4	11	1	29	0	4	0	6	0	17	174	8319197184	-160873152	460792	0	0
	1	202	2	2	5	4	0	8	6	1	16	0	14	0	6	0	6	18	8234035712	-180635648	483897	0	0
	1	144	1	4	2	6	4	4	7	3	22	0	3	2	0	0	6	156	9241720832	-650357312	485144	0	0
	3	159	0	4	3	20	0	7	9	0	25	0	12	0	3	0	14	1	7948854272	-134437056	479293	0	0
	1	144	0	4	2	6	1	5	8	3	23	0	4	2	0	0	7	159	9327337472	-644901504	483664	0	0
	1	144	1	4	1	7	3	4	8	3	23	0	3	2	0	0	6	158	9260744704	-658593088	486827	0	0
	3	143	0	5	3	5	2	5	12	0	15	1	1	5	5	0	0	57	8399862784	-626150272	504690	0	0
	3	156	4	1	6	2	6	4	2	5	17	0	3	2	8	0	19	58	9731350528	-780936704	500925	0	0
	2	176	1	4	3	13	2	4	0	3	12	0	11	0	8	0	8	99	8571524096	-301922848	473328	0	0
	4	78	0	5	4	3	0	5	5	1	11	1	3	1	8	0	19	145	8378792448	-258274576	471790	0	0
	2	176	1	4	3	13	2	4	0	3	12	0	10	0	8	0	8	98	8570962432	-301634400	473463	0	0
	2	176	1	4	3	13	0	5	0	3	12	0	12	0	8	0	10	91	8610612224	-301868544	472417	0	0
	0	124	0	4	3	7	2	4	8	3	23	0	4	2	1	0	8	159	9212431360	-527987712	485933	0	0
	3	147	4	1	6	2	6	4	2	5	17	0	2	2	8	0	19	19	9682051072	-764836608	507820	0	0
	4	67	0	5	5	3	0	5	4	1	6	1	4	1	8	0	19	171	8402377216	-269691968	470555	0	0
	3	147	4	1	6	0	6	4	2	5	17	0	3	2	8	0	19	20	9781493760	-980421184	521569	0	0
	3	115	0	4	5	3	0	5	6	1	8	1	3	1	8	0	19	131	8305594368	-217370464	470859	0	0
	4	78	0	5	5	5	0	5	5	1	11	1	3	1	8	0	19	166	8414509568	-198738416	464923	0	0
	2	175	0	5	4	18	0	7	1	0	13	0	11	0	8	0	10	99	8065393152	-165288832	463814	0	0
	4	78	1	4	4	3	0	5	5	1	10	1	3	1	8	0	19	142	8344771584	-257239968	471773	0	0
--------------------------------------------------
#Generation	No.	-->14
#Variable_vector	Fitness_vector	Constraint_violation	Overall_penalty
	2	176	1	4	3	13	1	4	0	3	12	0	10	0	8	0	8	99	8631272448	-301726048	469809	0	0
	0	170	2	2	1	1	4	4	10	3	15	0	3	2	6	0	19	49	9577745408	-897844416	519995	0	0
	1	202	2	2	5	4	0	8	6	1	16	0	14	0	6	0	5	0	8224205824	-175547360	486282	0	0
	0	169	2	2	0	1	4	4	10	3	15	0	3	2	6	0	19	49	9582676992	-908478336	520790	0	0
	2	175	1	4	4	18	1	6	1	3	12	0	10	0	8	0	8	103	9118532608	-164047712	463781	0	0
	2	115	0	4	6	1	5	4	14	0	14	1	4	1	1	0	4	188	8733989888	-889892544	510806	0	0
	2	175	1	4	3	13	0	4	0	3	12	0	12	0	8	0	9	97	8481042432	-298907072	471161	0	0
	3	159	0	4	3	20	0	7	9	0	25	0	12	0	3	0	14	1	7948854272	-134437056	479293	0	0
	4	117	1	3	3	20	0	7	9	0	25	0	12	0	3	0	15	42	7973526528	-149457376	472317	0	0
	3	119	0	4	4	4	9	2	4	4	0	0	9	1	8	0	0	178	9549812736	-669433280	493650	0	0
	2	115	0	4	6	1	5	4	14	0	14	1	4	1	1	0	4	188	8733989888	-889892544	510806	0	0
	0	117	0	4	3	7	1	4	9	3	22	0	4	2	1	0	8	159	9362202624	-520593248	482303	0	0
	3	107	1	4	5	6	3	4	11	1	29	0	4	0	6	0	17	174	8319197184	-160873152	460792	0	0
	2	175	1	3	4	18	0	7	1	0	12	0	13	0	8	0	8	58	8015321088	-151068832	470013	0	0
	0	117	0	4	3	7	1	4	9	3	22	0	4	2	1	0	8	159	9362202624	-520593248	482303	0	0
	1	144	1	4	2	5	2	5	9	3	22	0	4	2	1	0	6	157	9363490816	-690604928	494218	0	0
	2	174	0	4	3	7	2	4	9	3	21	0	4	2	1	0	6	105	9172202496	-537636864	487315	0	0
	4	78	0	5	5	5	0	5	4	0	11	1	3	1	8	0	19	145	8318340096	-559368192	489824	0	0
	4	105	0	5	3	5	2	5	12	0	15	1	1	5	5	0	0	108	8435499008	-640705152	498265	0	0
	4	91	0	5	5	3	0	5	5	1	6	1	3	1	8	0	19	130	8279661056	-249985472	471881	0	0
	4	78	0	5	5	5	0	5	5	1	11	1	3	1	8	0	18	161	8407783936	-196182112	466121	0	0
	1	144	0	4	2	6	2	4	7	3	22	0	4	2	0	0	6	158	9111878656	-619658240	493217	0	0
	0	156	2	2	0	1	5	4	9	3	15	0	3	2	6	0	19	49	9553355776	-927908352	523660	0	0
	1	144	1	4	2	6	4	4	7	3	22	0	3	2	0	0	6	156	9241720832	-650357312	485144	0	0
	3	159	0	4	3	20	0	7	9	0	25	0	12	0	3	0	14	1	7948854272	-134437056	479293	0	0
	1	144	1	4	1	7	3	4	8	3	23	0	3	2	0	0	6	158	9260744704	-658593088	486827	0	0
	3	143	0	5	3	5	2	5	12	0	15	1	1	5	5	0	0	57	8399862784	-626150272	504690	0	0
	3	156	4	1	6	2	6	4	2	5	17	0	3	2	8	0	19	58	9731350528	-780936704	500925	0	0
	2	176	1	4	3	13	2	4	0	3	12	0	11	0	8	0	8	99	8571524096	-301922848	473328	0	0
	2	176	1	4	3	13	0	5	0	3	12	0	12	0	8	0	10	91	8610612224	-301868544	472417	0	0
	0	124	0	4	3	7	2	4	8	3	23	0	4	2	1	0	8	159	9212431360	-527987712	485933	0	0
	3	147	4	1	6	2	6	4	2	5	17	0	2	2	8	0	19	19	9682051072	-764836608	507820	0	0
	4	67	0	5	5	3	0	5	4	1	6	1	4	1	8	0	19	171	8402377216	-269691968	470555	0	0
	3	115	0	4	5	3	0	5	6	1	8	1	3	1	8	0	19	131	8305594368	-217370464	470859	0	0
	4	78	0	5	5	5	0	5	5	1	11	1	3	1	8	0	19	166	8414509568	-198738416	464923	0	0
	4	78	1	4	4	3	0	5	5	1	10	1	3	1	8	0	19	142	8344771584	-257239968	471773	0	0
	3	107	1	4	5	6	4	4	11	1	29	0	4	1	7	0	17	174	8445319168	-160873152	460770	0	0
	4	71	0	4	5	3	0	4	5	1	9	1	4	1	8	0	18	134	8265806848	-234616416	473766	0	0
	2	140	1	4	4	3	9	2	3	4	0	0	9	1	8	0	0	162	9499928576	-734335232	500042	0	0
	1	177	1	4	3	13	0	4	0	3	12	0	13	0	8	0	8	97	8484690944	-299162240	471060	0	0
	3	147	4	1	6	2	6	4	2	5	17	0	3	2	8	0	19	20	9703693312	-765181440	507661	0	0
	1	144	0	4	2	6	1	5	8	3	23	0	4	2	0	0	6	159	9327007744	-644978432	483628	0	0
	2	140	1	4	4	3	9	2	3	4	0	0	9	1	8	0	0	162	9499928576	-734335232	500042	0	0
	2	140	1	4	4	3	9	2	3	4	0	0	9	1	8	0	0	162	9499928576	-734335232	500042	0	0
	4	116	0	4	4	5	1	4	11	0	15	1	1	4	6	0	1	117	8550363648	-584861184	497452	0	0
	2	175	0	5	4	18	0	7	1	0	13	0	11	0	8	0	10	99	8065393152	-165288832	463814	0	0
	2	175	0	5	2	15	0	4	0	3	13	0	13	0	8	0	9	98	8562036736	-303442880	479845	0	0
	4	78	1	4	5	5	0	5	5	1	10	1	3	1	8	0	17	160	8375365632	-195732608	465821	0	0
	3	147	4	1	6	0	6	4	2	5	17	0	2	2	8	0	19	20	9760504832	-980421184	521566	0	0
	1	202	2	2	5	4	0	8	6	1	16	0	14	0	6	0	6	18	8234035712	-180635648	483897	0	0
--------------------------------------------------
#Generation	No.	-->15
#Variable_vector	Fitness_vector	Constraint_violation	Overall_penalty
	2	176	1	4	3	13	1	4	0	3	12	0	10	0	8	0	8	99	8631272448	-301726048	469809	0	0
	1	202	2	2	5	4	0	8	6	1	16	0	14	0	6	0	5	0	8224205824	-175547360	486282	0	0
	0	169	2	2	0	1	4	4	10	3	15	0	3	2	6	0	19	49	9582676992	-908478336	520790	0	0
	2	175	1	4	4	18	1	6	1	3	12	0	10	0	8	0	8	103	9118532608	-164047712	463781	0	0
	2	175	1	4	3	13	0	4	0	3	12	0	12	0	8	0	9	97	8481042432	-298907072	471161	0	0
	3	159	0	4	3	20	0	7	9	0	25	0	12	0	3	0	14	1	7948854272	-134437056	479293	0	0
	4	117	1	3	3	20	0	7	9	0	25	0	12	0	3	0	15	42	7973526528	-149457376	472317	0	0
	0	117	0	4	3	7	1	4	9	3	22	0	4	2	1	0	8	159	9362202624	-520593248	482303	0	0
	3	107	1	4	5	6	3	4	11	1	29	0	4	0	6	0	17	174	8319197184	-160873152	460792	0	0
	2	175	1	3	4	18	0	7	1	0	12	0	13	0	8	0	8	58	8015321088	-151068832	470013	0	0
	0	117	0	4	3	7	1	4	9	3	22	0	4	2	1	0	8	159	9362202624	-520593248	482303	0	0
	4	78	0	5	5	5	0	5	4	0	11	1	3	1	8	0	19	145	8318340096	-559368192	489824	0	0
	4	105	0	5	3	5	2	5	12	0	15	1	1	5	5	0	0	108	8435499008	-640705152	498265	0	0
	4	91	0	5	5	3	0	5	5	1	6	1	3	1	8	0	19	130	8279661056	-249985472	471881	0	0
	4	78	0	5	5	5	0	5	5	1	11	1	3	1	8	0	18	161	8407783936	-196182112	466121	0	0
	1	144	0	4	2	6	2	4	7	3	22	0	4	2	0	0	6	158	9111878656	-619658240	493217	0	0
	0	156	2	2	0	1	5	4	9	3	15	0	3	2	6	0	19	49	9553355776	-927908352	523660	0	0
	3	159	0	4	3	20	0	7	9	0	25	0	12	0	3	0	14	1	7948854272	-134437056	479293	0	0
	1	144	1	4	1	7	3	4	8	3	23	0	3	2	0	0	6	158	9260744704	-658593088	486827	0	0
	3	143	0	5	3	5	2	5	12	0	15	1	1	5	5	0	0	57	8399862784	-626150272	504690	0	0
	3	156	4	1	6	2	6	4	2	5	17	0	3	2	8	0	19	58	9731350528	-780936704	500925	0	0
	2	176	1	4	3	13	2	4	0	3	12	0	11	0	8	0	8	99	8571524096	-301922848	473328	0	0
	2	176	1	4	3	13	0	5	0	3	12	0	12	0	8	0	10	91	8610612224	-301868544	472417	0	0
	0	124	0	4	3	7	2	4	8	3	23	0	4	2	1	0	8	159	9212431360	-527987712	485933	0	0
	3	147	4	1	6	2	6	4	2	5	17	0	2	2	8	0	19	19	9682051072	-764836608	507820	0	0
	4	67	0	5	5	3	0	5	4	1	6	1	4	1	8	0	19	171	8402377216	-269691968	470555	0	0
	3	115	0	4	5	3	0	5	6	1	8	1	3	1	8	0	19	131	8305594368	-217370464	470859	0	0
	4	78	0	5	5	5	0	5	5	1	11	1	3	1	8	0	19	166	8414509568	-198738416	464923	0	0
	4	78	1	4	4	3	0	5	5	1	10	1	3	1	8	0	19	142	8344771584	-257239968	471773	0	0
	3	107	1	4	5	6	4	4	11	1	29	0	4	1	7	0	17	174	8445319168	-160873152	460770	0	0
	4	71	0	4	5	3	0	4	5	1	9	1	4	1	8	0	18	134	8265806848	-234616416	473766	0	0
	1	177	1	4	3	13	0	4	0	3	12	0	13	0	8	0	8	97	8484690944	-299162240	471060	0	0
	3	147	4	1	6	2	6	4	2	5	17	0	3	2	8	0	19	20	9703693312	-765181440	507661	0	0
	1	144	0	4	2	6	1	5	8	3	23	0	4	2	0	0	6	159	9327007744	-644978432	483628	0	0
	2	175	0	5	4	18	0	7	1	0	13	0	11	0	8	0	10	99	8065393152	-165288832	463814	0	0
	2	175	0	5	2	15	0	4	0	3	13	0	13	0	8	0	9	98	8562036736	-303442880	479845	0	0
	4	78	1	4	5	5	0	5	5	1	10	1	3	1	8	0	17	160	8375365632	-195732608	465821	0	0
	3	147	4	1	6	0	6	4	2	5	17	0	2	2	8	0	19	20	9760504832	-980421184	521566	0	0
	1	202	2	2	5	4	0	8	6	1	16	0	14	0	6	0	6	18	8234035712	-180635648	483897	0	0
	1	144	0	4	1	4	1	5	8	3	23	0	4	1	0	0	6	159	9305238528	-764599872	492407	0	0
	3	116	0	4	5	1	5	4	14	0	14	1	4	1	1	0	4	188	8717646848	-898744320	510179	0	0
	2	158	1	3	4	18	0	7	1	0	13	0	13	0	8	0	8	62	8008994816	-147501888	470492	0	0
	4	116	0	5	3	5	2	5	12	0	14	1	1	5	5	0	0	104	8436880896	-644317696	498174	0	0
	1	177	1	4	3	13	1	5	0	3	12	0	13	0	8	0	8	97	8806691840	-301901664	472032	0	0
	1	144	1	4	2	6	4	4	7	3	22	0	3	2	0	0	6	156	9241720832	-650357312	485144	0	0
	4	105	0	5	3	5	2	5	13	0	15	1	1	5	5	0	0	67	8414778880	-630065792	503254	0	0
	0	170	2	2	1	1	4	4	10	3	15	0	3	2	7	0	19	80	9598416896	-908534656	514983	0	0
	1	171	1	3	4	19	0	7	1	0	12	0	13	0	8	0	8	58	8037558784	-145168736	469766	0	0
	3	115	1	4	5	3	0	5	6	1	9	1	3	1	8	0	19	131	8309521408	-217370464	470642	0	0
	4	78	0	5	4	5	0	5	4	0	11	1	4	1	8	0	19	170	8399603712	-597644864	486986	0	0
--------------------------------------------------
#Generation	No.	-->16
#Variable_vector	Fitness_vector	Constraint_violation	Overall_penalty
	1	202	2	2	5	4	0	8	6	1	16	0	14	0	6	0	5	0	8224205824	-175547360	486282	0	0
	0	169	2	2	0	1	4	4	10	3	15	0	3	2	6	0	19	49	9582676992	-908478336	520790	0	0
	2	175	1	4	3	13	0	4	0	3	12	0	12	0	8	0	9	97	8481042432	-298907072	471161	0	0
	3	159	0	4	3	20	0	7	9	0	25	0	12	0	3	0	14	1	7948854272	-134437056	479293	0	0
	0	117	0	4	3	7	1	4	9	3	22	0	4	2	1	0	8	159	9362202624	-520593248	482303	0	0
	3	107	1	4	5	6	3	4	11	1	29	0	4	0	6	0	17	174	8319197184	-160873152	460792	0	0
	2	175	1	3	4	18	0	7	1	0	12	0	13	0	8	0	8	58	8015321088	-151068832	470013	0	0
	0	117	0	4	3	7	1	4	9	3	22	0	4	2	1	0	8	159	9362202624	-520593248	482303	0	0
	4	78	0	5	5	5	0	5	4	0	11	1	3	1	8	0	19	145	8318340096	-559368192	489824	0	0
	4	105	0	5	3	5	2	5	12	0	15	1	1	5	5	0	0	108	8435499008	-640705152	498265	0	0
	4	78	0	5	5	5	0	5	5	1	11	1	3	1	8	0	18	161	8407783936	-196182112	466121	0	0
	1	144	0	4	2	6	2	4	7	3	22	0	4	2	0	0	6	158	9111878656	-619658240	493217	0	0
	0	156	2	2	0	1	5	4	9	3	15	0	3	2	6	0	19	49	9553355776	-927908352	523660	0	0
	3	143	0	5	3	5	2	5	12	0	15	1	1	5	5	0	0	57	8399862784	-626150272	504690	0	0
	3	156	4	1	6	2	6	4	2	5	17	0	3	2	8	0	19	58	9731350528	-780936704	500925	0	0
	2	176	1	4	3	13	2	4	0	3	12	0	11	0	8	0	8	99	8571524096	-301922848	473328	0	0
	2	176	1	4	3	13	0	5	0	3	12	0	12	0	8	0	10	91	8610612224	-301868544	472417	0	0
	0	124	0	4	3	7	2	4	8	3	23	0	4	2	1	0	8	159	9212431360	-527987712	485933	0	0
	3	147	4	1	6	2	6	4	2	5	17	0	2	2	8	0	19	19	9682051072	-764836608	507820	0	0
	3	115	0	4	5	3	0	5	6	1	8	1	3	1	8	0	19	131	8305594368	-217370464	470859	0	0
	4	78	0	5	5	5	0	5	5	1	11	1	3	1	8	0	19	166	8414509568	-198738416	464923	0	0
	3	107	1	4	5	6	4	4	11	1	29	0	4	1	7	0	17	174	8445319168	-160873152	460770	0	0
	4	71	0	4	5	3	0	4	5	1	9	1	4	1	8	0	18	134	8265806848	-234616416	473766	0	0
	3	147	4	1	6	2	6	4	2	5	17	0	3	2	8	0	19	20	9703693312	-765181440	507661	0	0
	1	144	0	4	2	6	1	5	8	3	23	0	4	2	0	0	6	159	9327007744	-644978432	483628	0	0
	2	175	0	5	4	18	0	7	1	0	13	0	11	0	8	0	10	99	8065393152	-165288832	463814	0	0
	2	175	0	5	2	15	0	4	0	3	13	0	13	0	8	0	9	98	8562036736	-303442880	479845	0	0
	4	78	1	4	5	5	0	5	5	1	10	1	3	1	8	0	17	160	8375365632	-195732608	465821	0	0
	3	147	4	1	6	0	6	4	2	5	17	0	2	2	8	0	19	20	9760504832	-980421184	521566	0	0
	1	202	2	2	5	4	0	8	6	1	16	0	14	0	6	0	6	18	8234035712	-180635648	483897	0	0
	1	144	0	4	1	4	1	5	8	3	23	0	4	1	0	0	6	159	9305238528	-764599872	492407	0	0
	3	116	0	4	5	1	5	4	14	0	14	1	4	1	1	0	4	188	8717646848	-898744320	510179	0	0
	4	116	0	5	3	5	2	5	12	0	14	1	1	5	5	0	0	104	8436880896	-644317696	498174	0	0
	1	177	1	4	3	13	1	5	0	3	12	0	13	0	8	0	8	97	8806691840	-301901664	472032	0	0
	1	144	1	4	2	6	4	4	7	3	22	0	3	2	0	0	6	156	9241720832	-650357312	485144	0	0
	4	105	0	5	3	5	2	5	13	0	15	1	1	5	5	0	0	67	8414778880	-630065792	503254	0	0
	0	170	2	2	1	1	4	4	10	3	15	0	3	2	7	0	19	80	9598416896	-908534656	514983	0	0
	1	171	1	3	4	19	0	7	1	0	12	0	13	0	8	0	8	58	8037558784	-145168736	469766	0	0
	4	78	0	5	4	5	0	5	4	0	11	1	4	1	8	0	19	170	8399603712	-597644864	486986	0	0
	2	176	1	4	2	15	1	4	0	3	12	0	10	0	8	0	8	98	8698504192	-305831392	478426	0	0
	2	175	0	5	3	13	0	4	0	3	13	0	13	0	8	0	9	99	8494251520	-299482784	471180	0	0
	1	144	1	4	1	7	3	4	8	3	23	0	2	2	0	0	6	158	9239757824	-658593088	486825	0	0
	2	176	1	4	4	12	1	4	0	3	12	0	11	0	8	0	8	99	8655080448	-279171264	469055	0	0
	1	144	0	4	1	4	1	5	8	3	23	0	4	1	0	3	6	159	9441853440	-764599872	492403	0	0
	1	144	1	4	1	7	3	4	8	3	23	0	3	2	0	0	5	108	9232459776	-643793280	493768	0	0
	4	78	0	5	5	5	0	4	5	1	9	1	3	1	8	0	17	160	8269032448	-195162496	465475	0	0
	3	158	0	4	3	20	0	7	9	0	25	0	12	0	3	0	14	16	7958080000	-139066016	477048	0	0
	2	175	0	5	4	18	0	7	2	0	13	0	13	0	8	0	10	99	8065393152	-165288832	463814	0	0
	3	147	4	1	6	2	5	4	2	5	18	0	3	2	8	0	19	83	9704340480	-784276288	505914	0	0
	2	175	1	4	4	18	1	6	1	3	12	0	11	0	8	0	9	109	9122123776	-165717632	462998	0	0
--------------------------------------------------
#Generation	No.	-->17
#Variable_vector	Fitness_vector	Constraint_violation	Overall_penalty
	1	202	2	2	5	4	0	8	6	1	16	0	14	0	6	0	5	0	8224205824	-175547360	486282	0	0
	0	169	2	2	0	1	4	4	10	3	15	0	3	2	6	0	19	49	9582676992	-908478336	520790	0	0
	3	159	0	4	3	20	0	7	9	0	25	0	12	0	3	0	14	1	7948854272	-134437056	479293	0	0
	0	117	0	4	3	7	1	4	9	3	22	0	4	2	1	0	8	159	9362202624	-520593248	482303	0	0
	3	107	1	4	5	6	3	4	11	1	29	0	4	0	6	0	17	174	8319197184	-160873152	460792	0	0
	2	175	1	3	4	18	0	7	1	0	12	0	13	0	8	0	8	58	8015321088	-151068832	470013	0	0
	0	117	0	4	3	7	1	4	9	3	22	0	4	2	1	0	8	159	9362202624	-520593248	482303	0	0
	4	78	0	5	5	5	0	5	4	0	11	1	3	1	8	0	19	145	8318340096	-559368192	489824	0	0
	4	105	0	5	3	5	2	5	12	0	15	1	1	5	5	0	0	108	8435499008	-640705152	498265	0	0
	1	144	0	4	2	6	2	4	7	3	22	0	4	2	0	0	6	158	9111878656	-619658240	493217	0	0
	3	143	0	5	3	5	2	5	12	0	15	1	1	5	5	0	0	57	8399862784	-626150272	504690	0	0
	3	156	4	1	6	2	6	4	2	5	17	0	3	2	8	0	19	58	9731350528	-780936704	500925	0	0
	2	176	1	4	3	13	2	4	0	3	12	0	11	0	8	0	8	99	8571524096	-301922848	473328	0	0
	2	176	1	4	3	13	0	5	0	3	12	0	12	0	8	0	10	91	8610612224	-301868544	472417	0	0
	0	124	0	4	3	7	2	4	8	3	23	0	4	2	1	0	8	159	9212431360	-527987712	485933	0	0
	3	115	0	4	5	3	0	5	6	1	8	1	3	1	8	0	19	131	8305594368	-217370464	470859	0	0
	3	107	1	4	5	6	4	4	11	1	29	0	4	1	7	0	17	174	8445319168	-160873152	460770	0	0
	4	71	0	4	5	3	0	4	5	1	9	1	4	1	8	0	18	134	8265806848	-234616416	473766	0	0
	1	144	0	4	2	6	1	5	8	3	23	0	4	2	0	0	6	159	9327007744	-644978432	483628	0	0
	2	175	0	5	4	18	0	7	1	0	13	0	11	0	8	0	10	99	8065393152	-165288832	463814	0	0
	2	175	0	5	2	15	0	4	0	3	13	0	13	0	8	0	9	98	8562036736	-303442880	479845	0	0
	1	202	2	2	5	4	0	8	6	1	16	0	14	0	6	0	6	18	8234035712	-180635648	483897	0	0
	1	144	0	4	1	4	1	5	8	3	23	0	4	1	0	0	6	159	9305238528	-764599872	492407	0	0
	3	116	0	4	5	1	5	4	14	0	14	1	4	1	1	0	4	188	8717646848	-898744320	510179	0	0
	1	177	1	4	3	13	1	5	0	3	12	0	13	0	8	0	8	97	8806691840	-301901664	472032	0	0
	1	144	1	4	2	6	4	4	7	3	22	0	3	2	0	0	6	156	9241720832	-650357312	485144	0	0
	0	170	2	2	1	1	4	4	10	3	15	0	3	2	7	0	19	80	9598416896	-908534656	514983	0	0
	1	171	1	3	4	19	0	7	1	0	12	0	13	0	8	0	8	58	8037558784	-145168736	469766	0	0
	4	78	0	5	4	5	0	5	4	0	11	1	4	1	8	0	19	170	8399603712	-597644864	486986	0	0
	2	176	1	4	2	15	1	4	0	3	12	0	10	0	8	0	8	98	8698504192	-305831392	478426	0	0
	2	175	0	5	3	13	0	4	0	3	13	0	13	0	8	0	9	99	8494251520	-299482784	471180	0	0
	1	144	1	4	1	7	3	4	8	3	23	0	2	2	0	0	6	158	9239757824	-658593088	486825	0	0
	2	176	1	4	4	12	1	4	0	3	12	0	11	0	8	0	8	99	8655080448	-279171264	469055	0	0
	1	144	0	4	1	4	1	5	8	3	23	0	4	1	0	3	6	159	9441853440	-764599872	492403	0	0
	1	144	1	4	1	7	3	4	8	3	23	0	3	2	0	0	5	108	9232459776	-643793280	493768	0	0
	4	78	0	5	5	5	0	4	5	1	9	1	3	1	8	0	17	160	8269032448	-195162496	465475	0	0
	2	175	1	4	4	18	1	6	1	3	12	0	11	0	8	0	9	109	9122123776	-165717632	462998	0	0
	4	105	0	4	3	5	2	5	14	0	15	1	1	5	5	0	0	67	8404386816	-630065792	503064	0	0
	3	147	4	1	6	2	5	4	1	5	18	0	2	2	8	0	19	83	9579163648	-784276288	505564	0	0
	0	124	0	4	3	7	2	4	8	3	23	0	4	2	1	0	8	159	9212431360	-527987712	485933	0	0
	3	147	4	1	6	0	6	4	2	5	17	0	2	2	8	0	19	20	9760504832	-980421184	521566	0	0
	3	147	4	1	6	0	6	4	2	5	17	0	2	2	8	0	19	20	9760504832	-980421184	521566	0	0
	3	158	0	4	3	20	0	7	9	0	25	0	13	0	3	0	14	16	7958080000	-139066016	477048	0	0
	4	78	0	5	4	5	0	5	4	0	11	1	4	1	8	0	19	170	8399603712	-597644864	486986	0	0
	0	156	2	2	0	1	5	4	9	3	15	0	2	2	6	0	19	49	9532363776	-927908352	523656	0	0
	2	175	0	4	3	13	0	4	0	3	13	0	13	0	8	0	8	74	8470549504	-292327360	474384	0	0
	3	156	4	1	6	2	6	4	2	5	17	0	3	2	8	0	19	79	9745352704	-788178496	497529	0	0
	4	93	1	4	5	5	0	5	5	1	9	1	3	2	8	0	17	149	8372460032	-202564368	464956	0	0
	3	107	1	4	5	6	4	4	10	1	29	0	4	0	6	0	17	173	8351588352	-161943120	463750	0	0
	1	144	0	4	1	4	1	5	8	3	23	0	4	1	0	3	6	159	9441853440	-764599872	492403	0	0
--------------------------------------------------
#Generation	No.	-->18
#Variable_vector	Fitness_vector	Constraint_violation	Overall_penalty
	1	202	2	2	5	4	0	8	6	1	16	0	14	0	6	0	5	0	8224205824	-175547360	486282	0	0
	0	169	2	2	0	1	4	4	10	3	15	0	3	2	6	0	19	49	9582676992	-908478336	520790	0	0
	3	159	0	4	3	20	0	7	9	0	25	0	12	0	3	0	14	1	7948854272	-134437056	479293	0	0
	3	107	1	4	5	6	3	4	11	1	29	0	4	0	6	0	17	174	8319197184	-160873152	460792	0	0
	2	175	1	3	4	18	0	7	1	0	12	0	13	0	8	0	8	58	8015321088	-151068832	470013	0	0
	4	78	0	5	5	5	0	5	4	0	11	1	3	1	8	0	19	145	8318340096	-559368192	489824	0	0
	4	105	0	5	3	5	2	5	12	0	15	1	1	5	5	0	0	108	8435499008	-640705152	498265	0	0
	1	144	0	4	2	6	2	4	7	3	22	0	4	2	0	0	6	158	9111878656	-619658240	493217	0	0
	3	143	0	5	3	5	2	5	12	0	15	1	1	5	5	0	0	57	8399862784	-626150272	504690	0	0
	3	156	4	1	6	2	6	4	2	5	17	0	3	2	8	0	19	58	9731350528	-780936704	500925	0	0
	2	176	1	4	3	13	2	4	0	3	12	0	11	0	8	0	8	99	8571524096	-301922848	473328	0	0
	3	115	0	4	5	3	0	5	6	1	8	1	3	1	8	0	19	131	8305594368	-217370464	470859	0	0
	3	107	1	4	5	6	4	4	11	1	29	0	4	1	7	0	17	174	8445319168	-160873152	460770	0	0
	1	144	0	4	2	6	1	5	8	3	23	0	4	2	0	0	6	159	9327007744	-644978432	483628	0	0
	2	175	0	5	4	18	0	7	1	0	13	0	11	0	8	0	10	99	8065393152	-165288832	463814	0	0
	2	175	0	5	2	15	0	4	0	3	13	0	13	0	8	0	9	98	8562036736	-303442880	479845	0	0
	1	202	2	2	5	4	0	8	6	1	16	0	14	0	6	0	6	18	8234035712	-180635648	483897	0	0
	1	144	0	4	1	4	1	5	8	3	23	0	4	1	0	0	6	159	9305238528	-764599872	492407	0	0
	3	116	0	4	5	1	5	4	14	0	14	1	4	1	1	0	4	188	8717646848	-898744320	510179	0	0
	1	177	1	4	3	13	1	5	0	3	12	0	13	0	8	0	8	97	8806691840	-301901664	472032	0	0
	1	144	1	4	2	6	4	4	7	3	22	0	3	2	0	0	6	156	9241720832	-650357312	485144	0	0
	0	170	2	2	1	1	4	4	10	3	15	0	3	2	7	0	19	80	9598416896	-908534656	514983	0	0
	1	171	1	3	4	19	0	7	1	0	12	0	13	0	8	0	8	58	8037558784	-145168736	469766	0	0
	2	176	1	4	2	15	1	4	0	3	12	0	10	0	8	0	8	98	8698504192	-305831392	478426	0	0
	2	175	0	5	3	13	0	4	0	3	13	0	13	0	8	0	9	99	8494251520	-299482784	471180	0	0
	1	144	1	4	1	7	3	4	8	3	23	0	2	2	0	0	6	158	9239757824	-658593088	486825	0	0
	2	176	1	4	4	12	1	4	0	3	12	0	11	0	8	0	8	99	8655080448	-279171264	469055	0	0
	1	144	0	4	1	4	1	5	8	3	23	0	4	1	0	3	6	159	9441853440	-764599872	492403	0	0
	1	144	1	4	1	7	3	4	8	3	23	0	3	2	0	0	5	108	9232459776	-643793280	493768	0	0
	4	78	0	5	5	5	0	4	5	1	9	1	3	1	8	0	17	160	8269032448	-195162496	465475	0	0
	2	175	1	4	4	18	1	6	1	3	12	0	11	0	8	0	9	109	9122123776	-165717632	462998	0	0
	4	105	0	4	3	5	2	5	14	0	15	1	1	5	5	0	0	67	8404386816	-630065792	503064	0	0
	3	147	4	1	6	2	5	4	1	5	18	0	2	2	8	0	19	83	9579163648	-784276288	505564	0	0
	3	147	4	1	6	0	6	4	2	5	17	0	2	2	8	0	19	20	9760504832	-980421184	521566	0	0
	0	156	2	2	0	1	5	4	9	3	15	0	2	2	6	0	19	49	9532363776	-927908352	523656	0	0
	2	175	0	4	3	13	0	4	0	3	13	0	13	0	8	0	8	74	8470549504	-292327360	474384	0	0
	3	156	4	1	6	2	6	4	2	5	17	0	3	2	8	0	19	79	9745352704	-788178496	497529	0	0
	4	93	1	4	5	5	0	5	5	1	9	1	3	2	8	0	17	149	8372460032	-202564368	464956	0	0
	3	107	1	4	5	6	4	4	10	1	29	0	4	0	6	0	17	173	8351588352	-161943120	463750	0	0
	1	144	0	4	1	4	1	5	8	3	23	0	4	1	0	3	6	159	9441853440	-764599872	492403	0	0
	4	78	0	5	5	5	0	5	4	0	11	1	3	1	8	0	19	86	8278981120	-539022144	499364	0	0
	4	72	0	4	5	3	0	4	5	1	9	1	4	1	8	0	18	134	8263362048	-235374208	473582	0	0
	4	105	0	4	3	5	2	5	14	0	15	1	1	5	5	0	0	67	8404386816	-630065792	503064	0	0
	3	147	4	1	6	2	6	4	2	5	17	0	2	2	8	0	19	116	9746750464	-798286848	492135	0	0
	3	114	0	4	4	5	0	5	5	0	11	1	4	1	8	0	19	170	8366710784	-600607808	485878	0	0
	3	158	1	3	3	20	0	7	10	0	25	0	13	0	3	0	15	25	7948856832	-142145152	475244	0	0
	3	147	4	1	6	0	5	4	2	5	17	0	2	2	8	0	19	15	9746557952	-970662272	533991	0	0
	1	144	0	4	2	6	4	3	7	3	23	0	3	2	0	0	6	156	9094250496	-617624640	489027	0	0
	3	107	1	4	5	6	4	4	11	2	29	0	4	0	6	0	17	173	9055492096	-522944256	475897	0	0
	1	177	1	4	3	13	1	5	0	3	12	0	13	0	8	0	8	97	8806691840	-301901664	472032	0	0
--------------------------------------------------
#Generation	No.	-->19
#Variable_vector	Fitness_vector	Constraint_violation	Overall_penalty
	1	202	2	2	5	4	0	8	6	1	16	0	14	0	6	0	5	0	8224205824	-175547360	486282	0	0
	3	159	0	4	3	20	0	7	9	0	25	0	12	0	3	0	14	1	7948854272	-134437056	479293	0	0
	3	107	1	4	5	6	3	4	11	1	29	0	4	0	6	0	17	174	8319197184	-160873152	460792	0	0
	2	175	1	3	4	18	0	7	1	0	12	0	13	0	8	0	8	58	8015321088	-151068832	470013	0	0
	4	78	0	5	5	5	0	5	4	0	11	1	3	1	8	0	19	145	8318340096	-559368192	489824	0	0
	4	105	0	5	3	5	2	5	12	0	15	1	1	5	5	0	0	108	8435499008	-640705152	498265	0	0
	1	144	0	4	2	6	2	4	7	3	22	0	4	2	0	0	6	158	9111878656	-619658240	493217	0	0
	3	143	0	5	3	5	2	5	12	0	15	1	1	5	5	0	0	57	8399862784	-626150272	504690	0	0
	2	176	1	4	3	13	2	4	0	3	12	0	11	0	8	0	8	99	8571524096	-301922848	473328	0	0
	3	115	0	4	5	3	0	5	6	1	8	1	3	1	8	0	19	131	8305594368	-217370464	470859	0	0
	3	107	1	4	5	6	4	4	11	1	29	0	4	1	7	0	17	174	8445319168	-160873152	460770	0	0
	1	144	0	4	2	6	1	5	8	3	23	0	4	2	0	0	6	159	9327007744	-644978432	483628	0	0
	2	175	0	5	4	18	0	7	1	0	13	0	11	0	8	0	10	99	8065393152	-165288832	463814	0	0
	2	175	0	5	2	15	0	4	0	3	13	0	13	0	8	0	9	98	8562036736	-303442880	479845	0	0
	1	202	2	2	5	4	0	8	6	1	16	0	14	0	6	0	6	18	8234035712	-180635648	483897	0	0
	1	144	0	4	1	4	1	5	8	3	23	0	4	1	0	0	6	159	9305238528	-764599872	492407	0	0
	3	116	0	4	5	1	5	4	14	0	14	1	4	1	1	0	4	188	8717646848	-898744320	510179	0	0
	1	177	1	4	3	13	1	5	0	3	12	0	13	0	8	0	8	97	8806691840	-301901664	472032	0	0
	0	170	2	2	1	1	4	4	10	3	15	0	3	2	7	0	19	80	9598416896	-908534656	514983	0	0
	2	176	1	4	2	15	1	4	0	3	12	0	10	0	8	0	8	98	8698504192	-305831392	478426	0	0
	2	175	0	5	3	13	0	4	0	3	13	0	13	0	8	0	9	99	8494251520	-299482784	471180	0	0
	1	144	1	4	1	7	3	4	8	3	23	0	2	2	0	0	6	158	9239757824	-658593088	486825	0	0
	2	176	1	4	4	12	1	4	0	3	12	0	11	0	8	0	8	99	8655080448	-279171264	469055	0	0
	1	144	0	4	1	4	1	5	8	3	23	0	4	1	0	3	6	159	9441853440	-764599872	492403	0	0
	1	144	1	4	1	7	3	4	8	3	23	0	3	2	0	0	5	108	9232459776	-643793280	493768	0	0
	4	78	0	5	5	5	0	4	5	1	9	1	3	1	8	0	17	160	8269032448	-195162496	465475	0	0
	2	175	1	4	4	18	1	6	1	3	12	0	11	0	8	0	9	109	9122123776	-165717632	462998	0	0
	4	105	0	4	3	5	2	5	14	0	15	1	1	5	5	0	0	67	8404386816	-630065792	503064	0	0
	3	147	4	1	6	2	5	4	1	5	18	0	2	2	8	0	19	83	9579163648	-784276288	505564	0	0
	3	147	4	1	6	0	6	4	2	5	17	0	2	2	8	0	19	20	9760504832	-980421184	521566	0	0
	0	156	2	2	0	1	5	4	9	3	15	0	2	2	6	0	19	49	9532363776	-927908352	523656	0	0
	2	175	0	4	3	13	0	4	0	3	13	0	13	0	8	0	8	74	8470549504	-292327360	474384	0	0
	1	144	0	4	1	4	1	5	8	3	23	0	4	1	0	3	6	159	9441853440	-764599872	492403	0	0
	4	78	0	5	5	5	0	5	4	0	11	1	3	1	8	0	19	86	8278981120	-539022144	499364	0	0
	4	72	0	4	5	3	0	4	5	1	9	1	4	1	8	0	18	134	8263362048	-235374208	473582	0	0
	4	105	0	4	3	5	2	5	14	0	15	1	1	5	5	0	0	67	8404386816	-630065792	503064	0	0
	3	114	0	4	4	5	0	5	5	0	11	1	4	1	8	0	19	170	8366710784	-600607808	485878	0	0
	3	158	1	3	3	20	0	7	10	0	25	0	13	0	3	0	15	25	7948856832	-142145152	475244	0	0
	3	147	4	1	6	0	5	4	2	5	17	0	2	2	8	0	19	15	9746557952	-970662272	533991	0	0
	1	144	0	4	2	6	4	3	7	3	23	0	3	2	0	0	6	156	9094250496	-617624640	489027	0	0
	3	107	1	4	5	6	4	4	11	2	29	0	4	0	6	0	17	173	9055492096	-522944256	475897	0	0
	1	177	1	4	3	13	1	5	0	3	12	0	13	0	8	0	8	97	8806691840	-301901664	472032	0	0
	2	175	0	5	4	18	0	7	1	0	13	0	11	0	8	0	10	99	8065393152	-165288832	463814	0	0
	4	93	1	4	4	5	0	5	5	1	9	1	3	2	8	0	16	148	8351705600	-213589776	463655	0	0
	1	144	1	4	2	6	4	4	7	3	22	0	3	2	0	0	6	156	9241720832	-650357312	485144	0	0
	3	147	4	1	6	2	5	4	1	5	18	0	2	2	8	0	19	83	9579163648	-784276288	505564	0	0
	3	107	1	4	5	6	3	4	9	1	29	0	4	0	6	0	17	173	8248071168	-163256336	461661	0	0
	0	169	2	2	0	1	4	4	10	3	15	0	3	2	6	0	19	50	9583334400	-908823168	520628	0	0
	3	147	4	1	6	2	6	4	1	5	17	0	2	2	8	0	19	116	9643853824	-798286848	491916	0	0
	2	175	1	3	4	18	0	7	2	0	12	0	13	0	8	0	9	65	8019361792	-153051712	469084	0	0
--------------------------------------------------
#Generation	No.	-->20
#Variable_vector	Fitness_vector	Constraint_violation	Overall_penalty
	1	202	2	2	5	4	0	8	6	1	16	0	14	0	6	0	5	0	8224205824	-175547360	486282	0	0
	3	159	0	4	3	20	0	7	9	0	25	0	12	0	3	0	14	1	7948854272	-134437056	479293	0	0
	3	107	1	4	5	6	3	4	11	1	29	0	4	0	6	0	17	174	8319197184	-160873152	460792	0	0
	2	175	1	3	4	18	0	7	1	0	12	0	13	0	8	0	8	58	8015321088	-151068832	470013	0	0
	4	78	0	5	5	5	0	5	4	0	11	1	3	1	8	0	19	145	8318340096	-559368192	489824	0	0
	4	105	0	5	3	5	2	5	12	0	15	1	1	5	5	0	0	108	8435499008	-640705152	498265	0	0
	1	144	0	4	2	6	2	4	7	3	22	0	4	2	0	0	6	158	9111878656	-619658240	493217	0	0
	3	143	0	5	3	5	2	5	12	0	15	1	1	5	5	0	0	57	8399862784	-626150272	504690	0	0
	2	176	1	4	3	13	2	4	0	3	12	0	11	0	8	0	8	99	8571524096	-301922848	473328	0	0
	3	115	0	4	5	3	0	5	6	1	8	1	3	1	8	0	19	131	8305594368	-217370464	470859	0	0
	3	107	1	4	5	6	4	4	11	1	29	0	4	1	7	0	17	174	8445319168	-160873152	460770	0	0
	2	175	0	5	2	15	0	4	0	3	13	0	13	0	8	0	9	98	8562036736	-303442880	479845	0	0
	1	202	2	2	5	4	0	8	6	1	16	0	14	0	6	0	6	18	8234035712	-180635648	483897	0	0
	1	144	0	4	1	4	1	5	8	3	23	0	4	1	0	0	6	159	9305238528	-764599872	492407	0	0
	3	116	0	4	5	1	5	4	14	0	14	1	4	1	1	0	4	188	8717646848	-898744320	510179	0	0
	1	177	1	4	3	13	1	5	0	3	12	0	13	0	8	0	8	97	8806691840	-301901664	472032	0	0
	0	170	2	2	1	1	4	4	10	3	15	0	3	2	7	0	19	80	9598416896	-908534656	514983	0	0
	1	144	1	4	1	7	3	4	8	3	23	0	2	2	0	0	6	158	9239757824	-658593088	486825	0	0
	2	176	1	4	4	12	1	4	0	3	12	0	11	0	8	0	8	99	8655080448	-279171264	469055	0	0
	1	144	1	4	1	7	3	4	8	3	23	0	3	2	0	0	5	108	9232459776	-643793280	493768	0	0
	4	78	0	5	5	5	0	4	5	1	9	1	3	1	8	0	17	160	8269032448	-195162496	465475	0	0
	2	175	1	4	4	18	1	6	1	3	12	0	11	0	8	0	9	109	9122123776	-165717632	462998	0	0
	3	147	4	1	6	0	6	4	2	5	17	0	2	2	8	0	19	20	9760504832	-980421184	521566	0	0
	0	156	2	2	0	1	5	4	9	3	15	0	2	2	6	0	19	49	9532363776	-927908352	523656	0	0
	2	175	0	4	3	13	0	4	0	3	13	0	13	0	8	0	8	74	8470549504	-292327360	474384	0	0
	4	78	0	5	5	5	0	5	4	0	11	1	3	1	8	0	19	86	8278981120	-539022144	499364	0	0
	4	105	0	4	3	5	2	5	14	0	15	1	1	5	5	0	0	67	8404386816	-630065792	503064	0	0
	3	114	0	4	4	5	0	5	5	0	11	1	4	1	8	0	19	170	8366710784	-600607808	485878	0	0
	3	158	1	3	3	20	0	7	10	0	25	0	13	0	3	0	15	25	7948856832	-142145152	475244	0	0
	3	147	4	1	6	0	5	4	2	5	17	0	2	2	8	0	19	15	9746557952	-970662272	533991	0	0
	1	144	0	4	2	6	4	3	7	3	23	0	3	2	0	0	6	156	9094250496	-617624640	489027	0	0
	3	107	1	4	5	6	4	4	11	2	29	0	4	0	6	0	17	173	9055492096	-522944256	475897	0	0
	1	177	1	4	3	13	1	5	0	3	12	0	13	0	8	0	8	97	8806691840	-301901664	472032	0	0
	2	175	0	5	4	18	0	7	1	0	13	0	11	0	8	0	10	99	8065393152	-165288832	463814	0	0
	1	144	1	4	2	6	4	4	7	3	22	0	3	2	0	0	6	156	9241720832	-650357312	485144	0	0
	3	107	1	4	5	6	3	4	9	1	29	0	4	0	6	0	17	173	8248071168	-163256336	461661	0	0
	0	169	2	2	0	1	4	4	10	3	15	0	3	2	6	0	19	50	9583334400	-908823168	520628	0	0
	4	99	0	4	3	5	3	4	14	0	15	1	1	5	5	0	0	67	8427730432	-630379392	500664	0	0
	0	156	2	2	0	1	5	4	9	3	15	0	2	2	6	0	19	49	9532363776	-927908352	523656	0	0
	2	145	0	4	2	6	1	5	8	3	23	0	4	1	0	0	6	159	9259043840	-645808768	483449	0	0
	3	114	0	4	4	5	0	5	5	0	11	1	4	1	8	0	19	170	8366710784	-600607808	485878	0	0
	2	175	1	3	4	18	0	7	2	0	12	0	13	0	8	0	9	97	8037283840	-162263264	464764	0	0
	1	144	0	4	0	5	1	5	8	3	24	0	4	1	0	3	6	159	9439119360	-765939456	491248	0	0
	2	175	0	5	3	13	0	4	0	3	13	0	13	0	8	0	9	99	8494251520	-299482784	471180	0	0
	2	176	1	4	1	16	1	4	0	3	12	0	11	0	8	0	7	98	8644403200	-356887680	474913	0	0
	4	93	1	4	4	5	0	5	5	1	9	1	3	2	8	0	16	148	8351705600	-213589776	463655	0	0
	4	72	0	4	5	3	0	4	5	1	9	1	4	1	8	0	18	134	8263362048	-235374208	473582	0	0
	1	145	0	4	1	4	1	5	8	3	23	0	4	1	0	0	6	103	9273724928	-749176704	499732	0	0
	2	146	4	1	6	2	5	4	1	5	18	0	2	2	8	0	19	129	9625325568	-798738496	498527	0	0
	3	147	4	1	6	2	6	4	1	5	17	0	2	2	8	0	19	116	9643853824	-798286848	491916	0	0
--------------------------------------------------
#Generation	No.	-->21
#Variable_vector	Fitness_vector	Constraint_violation	Overall_penalty
	1	202	2	2	5	4	0	8	6	1	16	0	14	0	6	0	5	0	8224205824	-175547360	486282	0	0
	2	175	1	3	4	18	0	7	1	0	12	0	13	0	8	0	8	58	8015321088	-151068832	470013	0	0
	4	78	0	5	5	5	0	5	4	0	11	1	3	1	8	0	19	145	8318340096	-559368192	489824	0	0
	4	105	0	5	3	5	2	5	12	0	15	1	1	5	5	0	0	108	8435499008	-640705152	498265	0	0
	1	144	0	4	2	6	2	4	7	3	22	0	4	2	0	0	6	158	9111878656	-619658240	493217	0	0
	3	115	0	4	5	3	0	5	6	1	8	1	3	1	8	0	19	131	8305594368	-217370464	470859	0	0
	2	175	0	5	2	15	0	4	0	3	13	0	13	0	8	0	9	98	8562036736	-303442880	479845	0	0
	1	202	2	2	5	4	0	8	6	1	16	0	14	0	6	0	6	18	8234035712	-180635648	483897	0	0
	1	144	0	4	1	4	1	5	8	3	23	0	4	1	0	0	6	159	9305238528	-764599872	492407	0	0
	3	116	0	4	5	1	5	4	14	0	14	1	4	1	1	0	4	188	8717646848	-898744320	510179	0	0
	1	177	1	4	3	13	1	5	0	3	12	0	13	0	8	0	8	97	8806691840	-301901664	472032	0	0
	0	170	2	2	1	1	4	4	10	3	15	0	3	2	7	0	19	80	9598416896	-908534656	514983	0	0
	2	176	1	4	4	12	1	4	0	3	12	0	11	0	8	0	8	99	8655080448	-279171264	469055	0	0
	3	147	4	1	6	0	6	4	2	5	17	0	2	2	8	0	19	20	9760504832	-980421184	521566	0	0
	0	156	2	2	0	1	5	4	9	3	15	0	2	2	6	0	19	49	9532363776	-927908352	523656	0	0
	4	78	0	5	5	5	0	5	4	0	11	1	3	1	8	0	19	86	8278981120	-539022144	499364	0	0
	4	105	0	4	3	5	2	5	14	0	15	1	1	5	5	0	0	67	8404386816	-630065792	503064	0	0
	3	158	1	3	3	20	0	7	10	0	25	0	13	0	3	0	15	25	7948856832	-142145152	475244	0	0
	3	147	4	1	6	0	5	4	2	5	17	0	2	2	8	0	19	15	9746557952	-970662272	533991	0	0
	3	107	1	4	5	6	4	4	11	2	29	0	4	0	6	0	17	173	9055492096	-522944256	475897	0	0
	1	177	1	4	3	13	1	5	0	3	12	0	13	0	8	0	8	97	8806691840	-301901664	472032	0	0
	2	175	0	5	4	18	0	7	1	0	13	0	11	0	8	0	10	99	8065393152	-165288832	463814	0	0
	1	144	1	4	2	6	4	4	7	3	22	0	3	2	0	0	6	156	9241720832	-650357312	485144	0	0
	3	107	1	4	5	6	3	4	9	1	29	0	4	0	6	0	17	173	8248071168	-163256336	461661	0	0
	0	169	2	2	0	1	4	4	10	3	15	0	3	2	6	0	19	50	9583334400	-908823168	520628	0	0
	4	99	0	4	3	5	3	4	14	0	15	1	1	5	5	0	0	67	8427730432	-630379392	500664	0	0
	0	156	2	2	0	1	5	4	9	3	15	0	2	2	6	0	19	49	9532363776	-927908352	523656	0	0
	2	145	0	4	2	6	1	5	8	3	23	0	4	1	0	0	6	159	9259043840	-645808768	483449	0	0
	2	175	1	3	4	18	0	7	2	0	12	0	13	0	8	0	9	97	8037283840	-162263264	464764	0	0
	1	144	0	4	0	5	1	5	8	3	24	0	4	1	0	3	6	159	9439119360	-765939456	491248	0	0
	2	175	0	5	3	13	0	4	0	3	13	0	13	0	8	0	9	99	8494251520	-299482784	471180	0	0
	2	176	1	4	1	16	1	4	0	3	12	0	11	0	8	0	7	98	8644403200	-356887680	474913	0	0
	4	93	1	4	4	5	0	5	5	1	9	1	3	2	8	0	16	148	8351705600	-213589776	463655	0	0
	4	72	0	4	5	3	0	4	5	1	9	1	4	1	8	0	18	134	8263362048	-235374208	473582	0	0
	1	145	0	4	1	4	1	5	8	3	23	0	4	1	0	0	6	103	9273724928	-749176704	499732	0	0
	2	146	4	1	6	2	5	4	1	5	18	0	2	2	8	0	19	129	9625325568	-798738496	498527	0	0
	3	147	4	1	6	2	6	4	1	5	17	0	2	2	8	0	19	116	9643853824	-798286848	491916	0	0
	2	149	0	5	3	13	0	4	0	3	13	0	14	0	8	0	9	103	8489197056	-293149408	472385	0	0
	3	141	0	4	3	5	2	5	14	0	15	1	0	5	5	0	0	67	8375839744	-628079872	503452	0	0
	4	81	0	4	4	5	0	5	6	0	11	1	3	1	8	0	19	170	8355537920	-600096640	486106	0	0
	3	108	1	4	4	4	3	4	11	1	29	0	4	1	7	0	17	174	8322199040	-165860976	460533	0	0
	1	144	1	4	1	7	3	4	7	3	23	0	2	2	0	0	6	158	9178087424	-658593088	486608	0	0
	2	145	0	4	3	12	1	5	7	3	23	0	4	1	0	0	6	159	9215802368	-345009088	467390	0	0
	1	144	0	4	2	6	4	3	7	3	22	0	3	1	0	0	6	156	9053535232	-617624640	489023	0	0
	3	142	1	3	3	20	0	7	11	0	25	0	14	0	3	0	15	25	7946874880	-137088480	476352	0	0
	3	149	4	1	6	0	5	4	2	5	17	0	2	2	8	0	19	27	9755137024	-975404160	531922	0	0
	0	167	2	2	0	1	5	4	10	3	15	0	3	2	6	0	18	44	9618657280	-929626240	524204	0	0
	2	175	1	3	3	13	0	4	0	3	14	0	14	0	8	0	8	74	8456500224	-292327360	474065	0	0
	4	78	0	5	5	5	0	4	5	1	8	1	3	1	8	0	17	160	8259917824	-195162496	465493	0	0
	2	141	4	1	6	2	4	4	1	5	18	0	2	2	8	0	19	129	9577373696	-785809600	495664	0	0
--------------------------------------------------
#Generation	No.	-->22
#Variable_vector	Fitness_vector	Constraint_violation	Overall_penalty
	1	202	2	2	5	4	0	8	6	1	16	0	14	0	6	0	5	0	8224205824	-175547360	486282	0	0
	2	175	1	3	4	18	0	7	1	0	12	0	13	0	8	0	8	58	8015321088	-151068832	470013	0	0
	4	78	0	5	5	5	0	5	4	0	11	1	3	1	8	0	19	145	8318340096	-559368192	489824	0	0
	4	105	0	5	3	5	2	5	12	0	15	1	1	5	5	0	0	108	8435499008	-640705152	498265	0	0
	1	144	0	4	2	6	2	4	7	3	22	0	4	2	0	0	6	158	9111878656	-619658240	493217	0	0
	3	115	0	4	5	3	0	5	6	1	8	1	3	1	8	0	19	131	8305594368	-217370464	470859	0	0
	2	175	0	5	2	15	0	4	0	3	13	0	13	0	8	0	9	98	8562036736	-303442880	479845	0	0
	1	202	2	2	5	4	0	8	6	1	16	0	14	0	6	0	6	18	8234035712	-180635648	483897	0	0
	1	144	0	4	1	4	1	5	8	3	23	0	4	1	0	0	6	159	9305238528	-764599872	492407	0	0
	3	116	0	4	5	1	5	4	14	0	14	1	4	1	1	0	4	188	8717646848	-898744320	510179	0	0
	1	177	1	4	3	13	1	5	0	3	12	0	13	0	8	0	8	97	8806691840	-301901664	472032	0	0
	0	170	2	2	1	1	4	4	10	3	15	0	3	2	7	0	19	80	9598416896	-908534656	514983	0	0
	2	176	1	4	4	12	1	4	0	3	12	0	11	0	8	0	8	99	8655080448	-279171264	469055	0	0
	3	147	4	1	6	0	6	4	2	5	17	0	2	2	8	0	19	20	9760504832	-980421184	521566	0	0
	0	156	2	2	0	1	5	4	9	3	15	0	2	2	6	0	19	49	9532363776	-927908352	523656	0	0
	4	78	0	5	5	5	0	5	4	0	11	1	3	1	8	0	19	86	8278981120	-539022144	499364	0	0
	4	105	0	4	3	5	2	5	14	0	15	1	1	5	5	0	0	67	8404386816	-630065792	503064	0	0
	3	158	1	3	3	20	0	7	10	0	25	0	13	0	3	0	15	25	7948856832	-142145152	475244	0	0
	3	147	4	1	6	0	5	4	2	5	17	0	2	2	8	0	19	15	9746557952	-970662272	533991	0	0
	3	107	1	4	5	6	4	4	11	2	29	0	4	0	6	0	17	173	9055492096	-522944256	475897	0	0
	2	175	0	5	4	18	0	7	1	0	13	0	11	0	8	0	10	99	8065393152	-165288832	463814	0	0
	1	144	1	4	2	6	4	4	7	3	22	0	3	2	0	0	6	156	9241720832	-650357312	485144	0	0
	3	107	1	4	5	6	3	4	9	1	29	0	4	0	6	0	17	173	8248071168	-163256336	461661	0	0
	0	169	2	2	0	1	4	4	10	3	15	0	3	2	6	0	19	50	9583334400	-908823168	520628	0	0
	4	99	0	4	3	5	3	4	14	0	15	1	1	5	5	0	0	67	8427730432	-630379392	500664	0	0
	2	145	0	4	2	6	1	5	8	3	23	0	4	1	0	0	6	159	9259043840	-645808768	483449	0	0
	2	175	1	3	4	18	0	7	2	0	12	0	13	0	8	0	9	97	8037283840	-162263264	464764	0	0
	1	144	0	4	0	5	1	5	8	3	24	0	4	1	0	3	6	159	9439119360	-765939456	491248	0	0
	2	175	0	5	3	13	0	4	0	3	13	0	13	0	8	0	9	99	8494251520	-299482784	471180	0	0
	2	176	1	4	1	16	1	4	0	3	12	0	11	0	8	0	7	98	8644403200	-356887680	474913	0	0
	4	93	1	4	4	5	0	5	5	1	9	1	3	2	8	0	16	148	8351705600	-213589776	463655	0	0
	4	72	0	4	5	3	0	4	5	1	9	1	4	1	8	0	18	134	8263362048	-235374208	473582	0	0
	1	145	0	4	1	4	1	5	8	3	23	0	4	1	0	0	6	103	9273724928	-749176704	499732	0	0
	2	146	4	1	6	2	5	4	1	5	18	0	2	2	8	0	19	129	9625325568	-798738496	498527	0	0
	3	147	4	1	6	2	6	4	1	5	17	0	2	2	8	0	19	116	9643853824	-798286848	491916	0	0
	2	149	0	5	3	13	0	4	0	3	13	0	14	0	8	0	9	103	8489197056	-293149408	472385	0	0
	3	141	0	4	3	5	2	5	14	0	15	1	0	5	5	0	0	67	8375839744	-628079872	503452	0	0
	4	81	0	4	4	5	0	5	6	0	11	1	3	1	8	0	19	170	8355537920	-600096640	486106	0	0
	1	144	1	4	1	7	3	4	7	3	23	0	2	2	0	0	6	158	9178087424	-658593088	486608	0	0
	2	145	0	4	3	12	1	5	7	3	23	0	4	1	0	0	6	159	9215802368	-345009088	467390	0	0
	1	144	0	4	2	6	4	3	7	3	22	0	3	1	0	0	6	156	9053535232	-617624640	489023	0	0
	3	142	1	3	3	20	0	7	11	0	25	0	14	0	3	0	15	25	7946874880	-137088480	476352	0	0
	3	149	4	1	6	0	5	4	2	5	17	0	2	2	8	0	19	27	9755137024	-975404160	531922	0	0
	0	167	2	2	0	1	5	4	10	3	15	0	3	2	6	0	18	44	9618657280	-929626240	524204	0	0
	2	175	1	3	3	13	0	4	0	3	14	0	14	0	8	0	8	74	8456500224	-292327360	474065	0	0
	4	78	0	5	5	5	0	4	5	1	8	1	3	1	8	0	17	160	8259917824	-195162496	465493	0	0
	2	141	4	1	6	2	4	4	1	5	18	0	2	2	8	0	19	129	9577373696	-785809600	495664	0	0
	1	176	1	4	3	12	1	5	0	3	12	0	14	0	8	0	6	92	8787208192	-334854976	474036	0	0
	1	144	0	4	0	5	2	6	8	3	24	0	4	1	0	3	6	159	9513275392	-793206144	499043	0	0
	3	116	1	4	5	6	4	4	9	1	29	0	4	1	6	0	17	173	8356082176	-168185872	460427	0	0
--------------------------------------------------
#Generation	No.	-->23
#Variable_vector	Fitness_vector	Constraint_violation	Overall_penalty
	1	202	2	2	5	4	0	8	6	1	16	0	14	0	6	0	5	0	8224205824	-175547360	486282	0	0
	2	175	1	3	4	18	0	7	1	0	12	0	13	0	8	0	8	58	8015321088	-151068832	470013	0	0
	4	78	0	5	5	5	0	5	4	0	11	1	3	1	8	0	19	145	8318340096	-559368192	489824	0	0
	4	105	0	5	3	5	2	5	12	0	15	1	1	5	5	0	0	108	8435499008	-640705152	498265	0	0
	1	144	0	4	2	6	2	4	7	3	22	0	4	2	0	0	6	158	9111878656	-619658240	493217	0	0
	2	175	0	5	2	15	0	4	0	3	13	0	13	0	8	0	9	98	8562036736	-303442880	479845	0	0
	1	144	0	4	1	4	1	5	8	3	23	0	4	1	0	0	6	159	9305238528	-764599872	492407	0	0
	3	116	0	4	5	1	5	4	14	0	14	1	4	1	1	0	4	188	8717646848	-898744320	510179	0	0
	0	170	2	2	1	1	4	4	10	3	15	0	3	2	7	0	19	80	9598416896	-908534656	514983	0	0
	2	176	1	4	4	12	1	4	0	3	12	0	11	0	8	0	8	99	8655080448	-279171264	469055	0	0
	3	147	4	1	6	0	6	4	2	5	17	0	2	2	8	0	19	20	9760504832	-980421184	521566	0	0
	0	156	2	2	0	1	5	4	9	3	15	0	2	2	6	0	19	49	9532363776	-927908352	523656	0	0
	4	105	0	4	3	5	2	5	14	0	15	1	1	5	5	0	0	67	8404386816	-630065792	503064	0	0
	3	158	1	3	3	20	0	7	10	0	25	0	13	0	3	0	15	25	7948856832	-142145152	475244	0	0
	3	147	4	1	6	0	5	4	2	5	17	0	2	2	8	0	19	15	9746557952	-970662272	533991	0	0
	3	107	1	4	5	6	4	4	11	2	29	0	4	0	6	0	17	173	9055492096	-522944256	475897	0	0
	2	175	0	5	4	18	0	7	1	0	13	0	11	0	8	0	10	99	8065393152	-165288832	463814	0	0
	1	144	1	4	2	6	4	4	7	3	22	0	3	2	0	0	6	156	9241720832	-650357312	485144	0	0
	3	107	1	4	5	6	3	4	9	1	29	0	4	0	6	0	17	173	8248071168	-163256336	461661	0	0
	0	169	2	2	0	1	4	4	10	3	15	0	3	2	6	0	19	50	9583334400	-908823168	520628	0	0
	4	99	0	4	3	5	3	4	14	0	15	1	1	5	5	0	0	67	8427730432	-630379392	500664	0	0
	2	145	0	4	2	6	1	5	8	3	23	0	4	1	0	0	6	159	9259043840	-645808768	483449	0	0
	2	175	1	3	4	18	0	7	2	0	12	0	13	0	8	0	9	97	8037283840	-162263264	464764	0	0
	1	144	0	4	0	5	1	5	8	3	24	0	4	1	0	3	6	159	9439119360	-765939456	491248	0	0
	2	176	1	4	1	16	1	4	0	3	12	0	11	0	8	0	7	98	8644403200	-356887680	474913	0	0
	4	93	1	4	4	5	0	5	5	1	9	1	3	2	8	0	16	148	8351705600	-213589776	463655	0	0
	1	145	0	4	1	4	1	5	8	3	23	0	4	1	0	0	6	103	9273724928	-749176704	499732	0	0
	2	146	4	1	6	2	5	4	1	5	18	0	2	2	8	0	19	129	9625325568	-798738496	498527	0	0
	3	141	0	4	3	5	2	5	14	0	15	1	0	5	5	0	0	67	8375839744	-628079872	503452	0	0
	4	81	0	4	4	5	0	5	6	0	11	1	3	1	8	0	19	170	8355537920	-600096640	486106	0	0
	1	144	1	4	1	7	3	4	7	3	23	0	2	2	0	0	6	158	9178087424	-658593088	486608	0	0
	2	145	0	4	3	12	1	5	7	3	23	0	4	1	0	0	6	159	9215802368	-345009088	467390	0	0
	1	144	0	4	2	6	4	3	7	3	22	0	3	1	0	0	6	156	9053535232	-617624640	489023	0	0
	3	142	1	3	3	20	0	7	11	0	25	0	14	0	3	0	15	25	7946874880	-137088480	476352	0	0
	0	167	2	2	0	1	5	4	10	3	15	0	3	2	6	0	18	44	9618657280	-929626240	524204	0	0
	2	175	1	3	3	13	0	4	0	3	14	0	14	0	8	0	8	74	8456500224	-292327360	474065	0	0
	4	78	0	5	5	5	0	4	5	1	8	1	3	1	8	0	17	160	8259917824	-195162496	465493	0	0
	2	141	4	1	6	2	4	4	1	5	18	0	2	2	8	0	19	129	9577373696	-785809600	495664	0	0
	1	144	0	4	0	5	2	6	8	3	24	0	4	1	0	3	6	159	9513275392	-793206144	499043	0	0
	3	116	1	4	5	6	4	4	9	1	29	0	4	1	6	0	17	173	8356082176	-168185872	460427	0	0
	4	94	0	5	5	5	0	5	4	0	11	1	3	1	8	0	19	86	8241768960	-550180352	496515	0	0
	0	126	1	4	0	7	3	4	7	3	23	0	1	2	0	0	6	158	9282408448	-697972480	493765	0	0
	3	140	0	4	5	4	0	5	6	1	8	1	4	1	8	0	19	131	8301049344	-204138336	466247	0	0
	3	107	1	4	4	6	5	4	11	2	29	0	4	0	6	0	17	173	9099444224	-565443584	478460	0	0
	3	116	0	4	5	1	5	4	14	0	14	1	4	1	1	0	4	188	8717646848	-898744320	510179	0	0
	1	144	1	4	1	7	3	4	7	3	23	0	2	2	0	0	6	158	9178087424	-658593088	486608	0	0
	3	149	4	1	6	0	5	4	2	5	17	0	2	2	8	0	19	27	9755137024	-975404160	531922	0	0
	4	72	0	4	5	3	0	4	5	1	9	1	4	1	8	0	18	134	8263362048	-235374208	473582	0	0
	2	176	1	4	0	20	1	4	0	3	12	0	11	0	8	0	8	97	8650428416	-360693696	471906	0	0
	0	169	2	2	0	1	4	5	9	3	15	0	3	2	6	0	19	50	9667145728	-947077376	516919	0	0
--------------------------------------------------
#Generation	No.	-->24
#Variable_vector	Fitness_vector	Constraint_violation	Overall_penalty
	1	202	2	2	5	4	0	8	6	1	16	0	14	0	6	0	5	0	8224205824	-175547360	486282	0	0
	2	175	1	3	4	18	0	7	1	0	12	0	13	0	8	0	8	58	8015321088	-151068832	470013	0	0
	4	78	0	5	5	5	0	5	4	0	11	1	3	1	8	0	19	145	8318340096	-559368192	489824	0	0
	4	105	0	5	3	5	2	5	12	0	15	1	1	5	5	0	0	108	8435499008	-640705152	498265	0	0
	2	175	0	5	2	15	0	4	0	3	13	0	13	0	8	0	9	98	8562036736	-303442880	479845	0	0
	1	144	0	4	1	4	1	5	8	3	23	0	4	1	0	0	6	159	9305238528	-764599872	492407	0	0
	3	116	0	4	5	1	5	4	14	0	14	1	4	1	1	0	4	188	8717646848	-898744320	510179	0	0
	2	176	1	4	4	12	1	4	0	3	12	0	11	0	8	0	8	99	8655080448	-279171264	469055	0	0
	3	147	4	1	6	0	6	4	2	5	17	0	2	2	8	0	19	20	9760504832	-980421184	521566	0	0
	0	156	2	2	0	1	5	4	9	3	15	0	2	2	6	0	19	49	9532363776	-927908352	523656	0	0
	4	105	0	4	3	5	2	5	14	0	15	1	1	5	5	0	0	67	8404386816	-630065792	503064	0	0
	3	158	1	3	3	20	0	7	10	0	25	0	13	0	3	0	15	25	7948856832	-142145152	475244	0	0
	3	107	1	4	5	6	4	4	11	2	29	0	4	0	6	0	17	173	9055492096	-522944256	475897	0	0
	2	175	0	5	4	18	0	7	1	0	13	0	11	0	8	0	10	99	8065393152	-165288832	463814	0	0
	0	169	2	2	0	1	4	4	10	3	15	0	3	2	6	0	19	50	9583334400	-908823168	520628	0	0
	4	99	0	4	3	5	3	4	14	0	15	1	1	5	5	0	0	67	8427730432	-630379392	500664	0	0
	2	175	1	3	4	18	0	7	2	0	12	0	13	0	8	0	9	97	8037283840	-162263264	464764	0	0
	1	144	0	4	0	5	1	5	8	3	24	0	4	1	0	3	6	159	9439119360	-765939456	491248	0	0
	2	176	1	4	1	16	1	4	0	3	12	0	11	0	8	0	7	98	8644403200	-356887680	474913	0	0
	1	145	0	4	1	4	1	5	8	3	23	0	4	1	0	0	6	103	9273724928	-749176704	499732	0	0
	3	141	0	4	3	5	2	5	14	0	15	1	0	5	5	0	0	67	8375839744	-628079872	503452	0	0
	4	81	0	4	4	5	0	5	6	0	11	1	3	1	8	0	19	170	8355537920	-600096640	486106	0	0
	1	144	1	4	1	7	3	4	7	3	23	0	2	2	0	0	6	158	9178087424	-658593088	486608	0	0
	2	145	0	4	3	12	1	5	7	3	23	0	4	1	0	0	6	159	9215802368	-345009088	467390	0	0
	1	144	0	4	2	6	4	3	7	3	22	0	3	1	0	0	6	156	9053535232	-617624640	489023	0	0
	3	142	1	3	3	20	0	7	11	0	25	0	14	0	3	0	15	25	7946874880	-137088480	476352	0	0
	0	167	2	2	0	1	5	4	10	3	15	0	3	2	6	0	18	44	9618657280	-929626240	524204	0	0
	2	175	1	3	3	13	0	4	0	3	14	0	14	0	8	0	8	74	8456500224	-292327360	474065	0	0
	4	78	0	5	5	5	0	4	5	1	8	1	3	1	8	0	17	160	8259917824	-195162496	465493	0	0
	2	141	4	1	6	2	4	4	1	5	18	0	2	2	8	0	19	129	9577373696	-785809600	495664	0	0
	3	116	1	4	5	6	4	4	9	1	29	0	4	1	6	0	17	173	8356082176	-168185872	460427	0	0
	4	94	0	5	5	5	0	5	4	0	11	1	3	1	8	0	19	86	8241768960	-550180352	496515	0	0
	0	126	1	4	0	7	3	4	7	3	23	0	1	2	0	0	6	158	9282408448	-697972480	493765	0	0
	3	140	0	4	5	4	0	5	6	1	8	1	4	1	8	0	19	131	8301049344	-204138336	466247	0	0
	3	116	0	4	5	1	5	4	14	0	14	1	4	1	1	0	4	188	8717646848	-898744320	510179	0	0
	3	149	4	1	6	0	5	4	2	5	17	0	2	2	8	0	19	27	9755137024	-975404160	531922	0	0
	2	176	1	4	0	20	1	4	0	3	12	0	11	0	8	0	8	97	8650428416	-360693696	471906	0	0
	0	169	2	2	0	1	4	5	9	3	15	0	3	2	6	0	19	50	9667145728	-947077376	516919	0	0
	3	147	4	1	6	0	5	4	2	5	17	0	2	2	8	0	19	15	9746557952	-970662272	533991	0	0
	3	117	0	4	5	1	5	4	14	0	14	1	4	1	1	0	4	162	8701751296	-892082816	513419	0	0
	1	144	0	4	0	5	2	5	8	3	24	0	4	1	0	3	6	159	9399262208	-772433600	499892	0	0
	3	141	0	4	3	5	4	4	14	0	15	1	0	6	6	0	0	67	8448768000	-631707904	496823	0	0
	1	144	0	4	0	5	2	6	8	3	25	0	3	1	0	3	6	159	9490793472	-793206144	499043	0	0
	2	144	1	4	1	7	4	4	7	3	24	0	2	2	0	0	6	158	9205066752	-659300224	483019	0	0
	3	141	0	4	2	0	2	5	14	0	15	1	0	5	5	0	0	67	9020439552	-933688448	553094	0	0
	4	73	1	3	5	3	0	4	5	1	9	1	4	1	8	0	18	134	8235795456	-236364000	472700	0	0
	3	137	0	5	4	5	0	5	5	1	9	1	3	2	8	0	16	148	8349992960	-216540096	463254	0	0
	0	156	2	2	1	3	4	4	9	3	15	0	2	2	6	0	19	65	9446746112	-799505536	509094	0	0
	3	108	1	4	4	6	5	4	11	2	29	0	4	0	6	0	17	173	9098160128	-565914880	478346	0	0
	1	144	0	4	2	6	2	4	7	3	22	0	4	2	0	0	6	158	9111878656	-619658240	493217	0	0
--------------------------------------------------
#Generation	No.	-->25
#Variable_vector	Fitness_vector	Constraint_violation	Overall_penalty
	1	202	2	2	5	4	0	8	6	1	16	0	14	0	6	0	5	0	8224205824	-175547360	486282	0	0
	2	175	1	3	4	18	0	7	1	0	12	0	13	0	8	0	8	58	8015321088	-151068832	470013	0	0
	4	78	0	5	5	5	0	5	4	0	11	1	3	1	8	0	19	145	8318340096	-559368192	489824	0	0
	4	105	0	5	3	5	2	5	12	0	15	1	1	5	5	0	0	108	8435499008	-640705152	498265	0	0
	2	175	0	5	2	15	0	4	0	3	13	0	13	0	8	0	9	98	8562036736	-303442880	479845	0	0
	1	144	0	4	1	4	1	5	8	3	23	0	4	1	0	0	6	159	9305238528	-764599872	492407	0	0
	2	176	1	4	4	12	1	4	0	3	12	0	11	0	8	0	8	99	8655080448	-279171264	469055	0	0
	3	147	4	1	6	0	6	4	2	5	17	0	2	2	8	0	19	20	9760504832	-980421184	521566	0	0
	4	105	0	4	3	5	2	5	14	0	15	1	1	5	5	0	0	67	8404386816	-630065792	503064	0	0
	3	158	1	3	3	20	0	7	10	0	25	0	13	0	3	0	15	25	7948856832	-142145152	475244	0	0
	3	107	1	4	5	6	4	4	11	2	29	0	4	0	6	0	17	173	9055492096	-522944256	475897	0	0
	2	175	0	5	4	18	0	7	1	0	13	0	11	0	8	0	10	99	8065393152	-165288832	463814	0	0
	0	169	2	2	0	1	4	4	10	3	15	0	3	2	6	0	19	50	9583334400	-908823168	520628	0	0
	4	99	0	4	3	5	3	4	14	0	15	1	1	5	5	0	0	67	8427730432	-630379392	500664	0	0
	2	175	1	3	4	18	0	7	2	0	12	0	13	0	8	0	9	97	8037283840	-162263264	464764	0	0
	1	144	0	4	0	5	1	5	8	3	24	0	4	1	0	3	6	159	9439119360	-765939456	491248	0	0
	1	145	0	4	1	4	1	5	8	3	23	0	4	1	0	0	6	103	9273724928	-749176704	499732	0	0
	3	141	0	4	3	5	2	5	14	0	15	1	0	5	5	0	0	67	8375839744	-628079872	503452	0	0
	4	81	0	4	4	5	0	5	6	0	11	1	3	1	8	0	19	170	8355537920	-600096640	486106	0	0
	1	144	1	4	1	7	3	4	7	3	23	0	2	2	0	0	6	158	9178087424	-658593088	486608	0	0
	2	145	0	4	3	12	1	5	7	3	23	0	4	1	0	0	6	159	9215802368	-345009088	467390	0	0
	1	144	0	4	2	6	4	3	7	3	22	0	3	1	0	0	6	156	9053535232	-617624640	489023	0	0
	3	142	1	3	3	20	0	7	11	0	25	0	14	0	3	0	15	25	7946874880	-137088480	476352	0	0
	2	175	1	3	3	13	0	4	0	3	14	0	14	0	8	0	8	74	8456500224	-292327360	474065	0	0
	4	78	0	5	5	5	0	4	5	1	8	1	3	1	8	0	17	160	8259917824	-195162496	465493	0	0
	3	116	1	4	5	6	4	4	9	1	29	0	4	1	6	0	17	173	8356082176	-168185872	460427	0	0
	4	94	0	5	5	5	0	5	4	0	11	1	3	1	8	0	19	86	8241768960	-550180352	496515	0	0
	0	126	1	4	0	7	3	4	7	3	23	0	1	2	0	0	6	158	9282408448	-697972480	493765	0	0
	3	116	0	4	5	1	5	4	14	0	14	1	4	1	1	0	4	188	8717646848	-898744320	510179	0	0
	3	149	4	1	6	0	5	4	2	5	17	0	2	2	8	0	19	27	9755137024	-975404160	531922	0	0
	2	176	1	4	0	20	1	4	0	3	12	0	11	0	8	0	8	97	8650428416	-360693696	471906	0	0
	0	169	2	2	0	1	4	5	9	3	15	0	3	2	6	0	19	50	9667145728	-947077376	516919	0	0
	3	147	4	1	6	0	5	4	2	5	17	0	2	2	8	0	19	15	9746557952	-970662272	533991	0	0
	1	144	0	4	0	5	2	6	8	3	25	0	3	1	0	3	6	159	9490793472	-793206144	499043	0	0
	2	144	1	4	1	7	4	4	7	3	24	0	2	2	0	0	6	158	9205066752	-659300224	483019	0	0
	3	141	0	4	2	0	2	5	14	0	15	1	0	5	5	0	0	67	9020439552	-933688448	553094	0	0
	4	73	1	3	5	3	0	4	5	1	9	1	4	1	8	0	18	134	8235795456	-236364000	472700	0	0
	3	137	0	5	4	5	0	5	5	1	9	1	3	2	8	0	16	148	8349992960	-216540096	463254	0	0
	0	156	2	2	1	3	4	4	9	3	15	0	2	2	6	0	19	65	9446746112	-799505536	509094	0	0
	3	108	1	4	4	6	5	4	11	2	29	0	4	0	6	0	17	173	9098160128	-565914880	478346	0	0
	1	144	0	4	2	6	2	4	7	3	22	0	4	2	0	0	6	158	9111878656	-619658240	493217	0	0
	1	145	0	4	1	4	2	5	8	3	23	0	4	1	0	0	6	103	9232360448	-755620352	508242	0	0
	0	184	2	2	0	1	5	4	9	3	15	0	3	2	6	0	18	44	9554046976	-934476224	522655	0	0
	2	141	4	1	6	2	4	4	1	5	18	0	2	2	8	0	19	129	9577373696	-785809600	495664	0	0
	3	149	4	1	6	0	6	4	2	5	17	0	2	2	8	0	19	68	9793101824	-997577600	513676	0	0
	3	119	0	4	5	1	5	4	14	0	14	1	4	1	1	0	4	162	8698506240	-893061824	513162	0	0
	0	154	2	2	0	1	5	4	9	3	15	0	2	2	7	0	19	49	9532092416	-927281152	523792	0	0
	4	73	1	3	5	3	0	7	5	1	8	1	4	1	8	0	18	169	8629262336	-250238048	471600	0	0
	1	144	1	4	0	5	2	5	8	3	24	0	4	1	0	3	6	159	9394909184	-772433600	499709	0	0
	3	140	1	4	5	4	0	5	6	1	7	1	4	1	8	0	19	131	8264569856	-204138336	466021	0	0
--------------------------------------------------
#Generation	No.	-->26
#Variable_vector	Fitness_vector	Constraint_violation	Overall_penalty
	1	202	2	2	5	4	0	8	6	1	16	0	14	0	6	0	5	0	8224205824	-175547360	486282	0	0
	2	175	1	3	4	18	0	7	1	0	12	0	13	0	8	0	8	58	8015321088	-151068832	470013	0	0
	4	78	0	5	5	5	0	5	4	0	11	1	3	1	8	0	19	145	8318340096	-559368192	489824	0	0
	4	105	0	5	3	5	2	5	12	0	15	1	1	5	5	0	0	108	8435499008	-640705152	498265	0	0
	2	175	0	5	2	15	0	4	0	3	13	0	13	0	8	0	9	98	8562036736	-303442880	479845	0	0
	2	176	1	4	4	12	1	4	0	3	12	0	11	0	8	0	8	99	8655080448	-279171264	469055	0	0
	3	147	4	1	6	0	6	4	2	5	17	0	2	2	8	0	19	20	9760504832	-980421184	521566	0	0
	4	105	0	4	3	5	2	5	14	0	15	1	1	5	5	0	0	67	8404386816	-630065792	503064	0	0
	3	158	1	3	3	20	0	7	10	0	25	0	13	0	3	0	15	25	7948856832	-142145152	475244	0	0
	3	107	1	4	5	6	4	4	11	2	29	0	4	0	6	0	17	173	9055492096	-522944256	475897	0	0
	2	175	0	5	4	18	0	7	1	0	13	0	11	0	8	0	10	99	8065393152	-165288832	463814	0	0
	2	175	1	3	4	18	0	7	2	0	12	0	13	0	8	0	9	97	8037283840	-162263264	464764	0	0
	1	144	0	4	0	5	1	5	8	3	24	0	4	1	0	3	6	159	9439119360	-765939456	491248	0	0
	1	145	0	4	1	4	1	5	8	3	23	0	4	1	0	0	6	103	9273724928	-749176704	499732	0	0
	3	141	0	4	3	5	2	5	14	0	15	1	0	5	5	0	0	67	8375839744	-628079872	503452	0	0
	4	81	0	4	4	5	0	5	6	0	11	1	3	1	8	0	19	170	8355537920	-600096640	486106	0	0
	2	145	0	4	3	12	1	5	7	3	23	0	4	1	0	0	6	159	9215802368	-345009088	467390	0	0
	1	144	0	4	2	6	4	3	7	3	22	0	3	1	0	0	6	156	9053535232	-617624640	489023	0	0
	3	142	1	3	3	20	0	7	11	0	25	0	14	0	3	0	15	25	7946874880	-137088480	476352	0	0
	2	175	1	3	3	13	0	4	0	3	14	0	14	0	8	0	8	74	8456500224	-292327360	474065	0	0
	4	78	0	5	5	5	0	4	5	1	8	1	3	1	8	0	17	160	8259917824	-195162496	465493	0	0
	3	116	1	4	5	6	4	4	9	1	29	0	4	1	6	0	17	173	8356082176	-168185872	460427	0	0
	4	94	0	5	5	5	0	5	4	0	11	1	3	1	8	0	19	86	8241768960	-550180352	496515	0	0
	3	116	0	4	5	1	5	4	14	0	14	1	4	1	1	0	4	188	8717646848	-898744320	510179	0	0
	3	149	4	1	6	0	5	4	2	5	17	0	2	2	8	0	19	27	9755137024	-975404160	531922	0	0
	2	176	1	4	0	20	1	4	0	3	12	0	11	0	8	0	8	97	8650428416	-360693696	471906	0	0
	0	169	2	2	0	1	4	5	9	3	15	0	3	2	6	0	19	50	9667145728	-947077376	516919	0	0
	3	147	4	1	6	0	5	4	2	5	17	0	2	2	8	0	19	15	9746557952	-970662272	533991	0	0
	3	141	0	4	2	0	2	5	14	0	15	1	0	5	5	0	0	67	9020439552	-933688448	553094	0	0
	4	73	1	3	5	3	0	4	5	1	9	1	4	1	8	0	18	134	8235795456	-236364000	472700	0	0
	3	137	0	5	4	5	0	5	5	1	9	1	3	2	8	0	16	148	8349992960	-216540096	463254	0	0
	0	156	2	2	1	3	4	4	9	3	15	0	2	2	6	0	19	65	9446746112	-799505536	509094	0	0
	3	108	1	4	4	6	5	4	11	2	29	0	4	0	6	0	17	173	9098160128	-565914880	478346	0	0
	1	144	0	4	2	6	2	4	7	3	22	0	4	2	0	0	6	158	9111878656	-619658240	493217	0	0
	0	184	2	2	0	1	5	4	9	3	15	0	3	2	6	0	18	44	9554046976	-934476224	522655	0	0
	2	141	4	1	6	2	4	4	1	5	18	0	2	2	8	0	19	129	9577373696	-785809600	495664	0	0
	3	149	4	1	6	0	6	4	2	5	17	0	2	2	8	0	19	68	9793101824	-997577600	513676	0	0
	3	119	0	4	5	1	5	4	14	0	14	1	4	1	1	0	4	162	8698506240	-893061824	513162	0	0
	0	154	2	2	0	1	5	4	9	3	15	0	2	2	7	0	19	49	9532092416	-927281152	523792	0	0
	4	73	1	3	5	3	0	7	5	1	8	1	4	1	8	0	18	169	8629262336	-250238048	471600	0	0
	1	144	1	4	0	5	2	5	8	3	24	0	4	1	0	3	6	159	9394909184	-772433600	499709	0	0
	3	140	1	4	5	4	0	5	6	1	7	1	4	1	8	0	19	131	8264569856	-204138336	466021	0	0
	3	119	0	5	6	3	5	4	14	0	14	1	4	2	1	0	2	149	8581691904	-698972736	499336	0	0
	2	175	0	5	2	15	0	4	0	3	13	0	13	0	8	0	9	98	8562036736	-303442880	479845	0	0
	1	144	1	4	0	5	2	5	7	3	24	0	4	1	0	3	6	158	9327594496	-772150912	499127	0	0
	1	145	0	4	0	2	1	5	8	3	24	0	4	1	0	3	6	159	9486565376	-869318272	501220	0	0
	1	144	0	5	2	8	4	3	7	3	23	0	3	1	0	0	6	155	9050136576	-547300736	484066	0	0
	2	144	1	4	1	7	4	4	7	3	25	0	2	2	0	0	6	158	9205066752	-659300224	483019	0	0
	1	144	1	4	1	7	3	4	7	3	23	0	2	2	0	0	6	158	9178087424	-658593088	486608	0	0
	3	141	0	4	3	4	2	6	14	0	15	1	1	3	5	0	0	67	8430225920	-692072064	506519	0	0
--------------------------------------------------
#Generation	No.	-->27
#Variable_vector	Fitness_vector	Constraint_violation	Overall_penalty
	1	202	2	2	5	4	0	8	6	1	16	0	14	0	6	0	5	0	8224205824	-175547360	486282	0	0
	2	175	1	3	4	18	0	7	1	0	12	0	13	0	8	0	8	58	8015321088	-151068832	470013	0	0
	4	78	0	5	5	5	0	5	4	0	11	1	3	1	8	0	19	145	8318340096	-559368192	489824	0	0
	2	176	1	4	4	12	1	4	0	3	12	0	11	0	8	0	8	99	8655080448	-279171264	469055	0	0
	3	147	4	1	6	0	6	4	2	5	17	0	2	2	8	0	19	20	9760504832	-980421184	521566	0	0
	4	105	0	4	3	5	2	5	14	0	15	1	1	5	5	0	0	67	8404386816	-630065792	503064	0	0
	3	158	1	3	3	20	0	7	10	0	25	0	13	0	3	0	15	25	7948856832	-142145152	475244	0	0
	3	107	1	4	5	6	4	4	11	2	29	0	4	0	6	0	17	173	9055492096	-522944256	475897	0	0
	2	175	0	5	4	18	0	7	1	0	13	0	11	0	8	0	10	99	8065393152	-165288832	463814	0	0
	1	144	0	4	0	5	1	5	8	3	24	0	4	1	0	3	6	159	9439119360	-765939456	491248	0	0
	1	145	0	4	1	4	1	5	8	3	23	0	4	1	0	0	6	103	9273724928	-749176704	499732	0	0
	3	141	0	4	3	5	2	5	14	0	15	1	0	5	5	0	0	67	8375839744	-628079872	503452	0	0
	4	81	0	4	4	5	0	5	6	0	11	1	3	1	8	0	19	170	8355537920	-600096640	486106	0	0
	2	145	0	4	3	12	1	5	7	3	23	0	4	1	0	0	6	159	9215802368	-345009088	467390	0	0
	3	142	1	3	3	20	0	7	11	0	25	0	14	0	3	0	15	25	7946874880	-137088480	476352	0	0
	2	175	1	3	3	13	0	4	0	3	14	0	14	0	8	0	8	74	8456500224	-292327360	474065	0	0
	4	78	0	5	5	5	0	4	5	1	8	1	3	1	8	0	17	160	8259917824	-195162496	465493	0	0
	3	116	1	4	5	6	4	4	9	1	29	0	4	1	6	0	17	173	8356082176	-168185872	460427	0	0
	3	116	0	4	5	1	5	4	14	0	14	1	4	1	1	0	4	188	8717646848	-898744320	510179	0	0
	3	149	4	1	6	0	5	4	2	5	17	0	2	2	8	0	19	27	9755137024	-975404160	531922	0	0
	2	176	1	4	0	20	1	4	0	3	12	0	11	0	8	0	8	97	8650428416	-360693696	471906	0	0
	3	147	4	1	6	0	5	4	2	5	17	0	2	2	8	0	19	15	9746557952	-970662272	533991	0	0
	3	141	0	4	2	0	2	5	14	0	15	1	0	5	5	0	0	67	9020439552	-933688448	553094	0	0
	4	73	1	3	5	3	0	4	5	1	9	1	4	1	8	0	18	134	8235795456	-236364000	472700	0	0
	3	137	0	5	4	5	0	5	5	1	9	1	3	2	8	0	16	148	8349992960	-216540096	463254	0	0
	3	108	1	4	4	6	5	4	11	2	29	0	4	0	6	0	17	173	9098160128	-565914880	478346	0	0
	1	144	0	4	2	6	2	4	7	3	22	0	4	2	0	0	6	158	9111878656	-619658240	493217	0	0
	0	184	2	2	0	1	5	4	9	3	15	0	3	2	6	0	18	44	9554046976	-934476224	522655	0	0
	3	149	4	1	6	0	6	4	2	5	17	0	2	2	8	0	19	68	9793101824	-997577600	513676	0	0
	3	119	0	4	5	1	5	4	14	0	14	1	4	1	1	0	4	162	8698506240	-893061824	513162	0	0
	0	154	2	2	0	1	5	4	9	3	15	0	2	2	7	0	19	49	9532092416	-927281152	523792	0	0
	1	144	1	4	0	5	2	5	8	3	24	0	4	1	0	3	6	159	9394909184	-772433600	499709	0	0
	3	119	0	5	6	3	5	4	14	0	14	1	4	2	1	0	2	149	8581691904	-698972736	499336	0	0
	2	175	0	5	2	15	0	4	0	3	13	0	13	0	8	0	9	98	8562036736	-303442880	479845	0	0
	1	145	0	4	0	2	1	5	8	3	24	0	4	1	0	3	6	159	9486565376	-869318272	501220	0	0
	1	144	0	5	2	8	4	3	7	3	23	0	3	1	0	0	6	155	9050136576	-547300736	484066	0	0
	2	144	1	4	1	7	4	4	7	3	25	0	2	2	0	0	6	158	9205066752	-659300224	483019	0	0
	3	141	0	4	3	4	2	6	14	0	15	1	1	3	5	0	0	67	8430225920	-692072064	506519	0	0
	2	145	0	4	3	12	1	5	7	3	23	0	4	1	1	0	6	158	9215260672	-344726400	467522	0	0
	2	144	1	4	1	7	3	4	7	3	25	0	2	2	0	0	7	159	9175274496	-659222592	486438	0	0
	4	78	0	5	5	5	0	4	4	1	8	1	3	1	8	0	17	160	8258054656	-209222784	465804	0	0
	2	142	0	4	0	2	1	5	8	3	24	0	4	1	0	0	6	159	9346871296	-868723840	501391	0	0
	1	125	1	4	0	7	2	5	7	3	24	0	4	1	0	3	6	158	9299759104	-700505152	493618	0	0
	1	144	1	4	1	7	2	5	7	3	23	0	2	2	0	0	6	111	9098134528	-641950464	494615	0	0
	1	145	0	4	1	4	2	5	8	3	23	0	4	1	0	0	7	150	9258366976	-768833984	502046	0	0
	2	141	4	1	6	2	4	4	1	5	18	0	2	2	8	0	19	129	9577373696	-785809600	495664	0	0
	3	141	0	4	2	4	1	5	14	0	15	1	0	5	5	0	0	67	8628476928	-705090176	511848	0	0
	3	108	1	4	4	6	6	4	11	2	29	0	4	0	6	0	16	145	9149031424	-556204032	478260	0	0
	0	169	2	2	0	1	4	5	8	3	15	0	3	2	6	0	19	50	9582507008	-947077376	516754	0	0
	2	175	1	3	3	13	0	4	0	3	14	0	14	0	8	0	8	95	8468215808	-298384096	471226	0	0
--------------------------------------------------
#Generation	No.	-->28
#Variable_vector	Fitness_vector	Constraint_violation	Overall_penalty
	1	202	2	2	5	4	0	8	6	1	16	0	14	0	6	0	5	0	8224205824	-175547360	486282	0	0
	2	175	1	3	4	18	0	7	1	0	12	0	13	0	8	0	8	58	8015321088	-151068832	470013	0	0
	4	78	0	5	5	5	0	5	4	0	11	1	3	1	8	0	19	145	8318340096	-559368192	489824	0	0
	2	176	1	4	4	12	1	4	0	3	12	0	11	0	8	0	8	99	8655080448	-279171264	469055	0	0
	3	147	4	1	6	0	6	4	2	5	17	0	2	2	8	0	19	20	9760504832	-980421184	521566	0	0
	4	105	0	4	3	5	2	5	14	0	15	1	1	5	5	0	0	67	8404386816	-630065792	503064	0	0
	3	158	1	3	3	20	0	7	10	0	25	0	13	0	3	0	15	25	7948856832	-142145152	475244	0	0
	3	107	1	4	5	6	4	4	11	2	29	0	4	0	6	0	17	173	9055492096	-522944256	475897	0	0
	1	144	0	4	0	5	1	5	8	3	24	0	4	1	0	3	6	159	9439119360	-765939456	491248	0	0
	3	141	0	4	3	5	2	5	14	0	15	1	0	5	5	0	0	67	8375839744	-628079872	503452	0	0
	2	145	0	4	3	12	1	5	7	3	23	0	4	1	0	0	6	159	9215802368	-345009088	467390	0	0
	3	142	1	3	3	20	0	7	11	0	25	0	14	0	3	0	15	25	7946874880	-137088480	476352	0	0
	2	175	1	3	3	13	0	4	0	3	14	0	14	0	8	0	8	74	8456500224	-292327360	474065	0	0
	4	78	0	5	5	5	0	4	5	1	8	1	3	1	8	0	17	160	8259917824	-195162496	465493	0	0
	3	116	1	4	5	6	4	4	9	1	29	0	4	1	6	0	17	173	8356082176	-168185872	460427	0	0
	3	116	0	4	5	1	5	4	14	0	14	1	4	1	1	0	4	188	8717646848	-898744320	510179	0	0
	3	149	4	1	6	0	5	4	2	5	17	0	2	2	8	0	19	27	9755137024	-975404160	531922	0	0
	2	176	1	4	0	20	1	4	0	3	12	0	11	0	8	0	8	97	8650428416	-360693696	471906	0	0
	3	147	4	1	6	0	5	4	2	5	17	0	2	2	8	0	19	15	9746557952	-970662272	533991	0	0
	3	141	0	4	2	0	2	5	14	0	15	1	0	5	5	0	0	67	9020439552	-933688448	553094	0	0
	4	73	1	3	5	3	0	4	5	1	9	1	4	1	8	0	18	134	8235795456	-236364000	472700	0	0
	3	137	0	5	4	5	0	5	5	1	9	1	3	2	8	0	16	148	8349992960	-216540096	463254	0	0
	3	108	1	4	4	6	5	4	11	2	29	0	4	0	6	0	17	173	9098160128	-565914880	478346	0	0
	0	184	2	2	0	1	5	4	9	3	15	0	3	2	6	0	18	44	9554046976	-934476224	522655	0	0
	3	149	4	1	6	0	6	4	2	5	17	0	2	2	8	0	19	68	9793101824	-997577600	513676	0	0
	3	119	0	4	5	1	5	4	14	0	14	1	4	1	1	0	4	162	8698506240	-893061824	513162	0	0
	0	154	2	2	0	1	5	4	9	3	15	0	2	2	7	0	19	49	9532092416	-927281152	523792	0	0
	3	119	0	5	6	3	5	4	14	0	14	1	4	2	1	0	2	149	8581691904	-698972736	499336	0	0
	2	175	0	5	2	15	0	4	0	3	13	0	13	0	8	0	9	98	8562036736	-303442880	479845	0	0
	1	145	0	4	0	2	1	5	8	3	24	0	4	1	0	3	6	159	9486565376	-869318272	501220	0	0
	1	144	0	5	2	8	4	3	7	3	23	0	3	1	0	0	6	155	9050136576	-547300736	484066	0	0
	2	144	1	4	1	7	4	4	7	3	25	0	2	2	0	0	6	158	9205066752	-659300224	483019	0	0
	3	141	0	4	3	4	2	6	14	0	15	1	1	3	5	0	0	67	8430225920	-692072064	506519	0	0
	4	78	0	5	5	5	0	4	4	1	8	1	3	1	8	0	17	160	8258054656	-209222784	465804	0	0
	2	142	0	4	0	2	1	5	8	3	24	0	4	1	0	0	6	159	9346871296	-868723840	501391	0	0
	1	125	1	4	0	7	2	5	7	3	24	0	4	1	0	3	6	158	9299759104	-700505152	493618	0	0
	2	141	4	1	6	2	4	4	1	5	18	0	2	2	8	0	19	129	9577373696	-785809600	495664	0	0
	3	141	0	4	2	4	1	5	14	0	15	1	0	5	5	0	0	67	8628476928	-705090176	511848	0	0
	3	108	1	4	4	6	6	4	11	2	29	0	4	0	6	0	16	145	9149031424	-556204032	478260	0	0
	0	169	2	2	0	1	4	5	8	3	15	0	3	2	6	0	19	50	9582507008	-947077376	516754	0	0
	2	175	1	3	3	13	0	4	0	3	14	0	14	0	8	0	8	95	8468215808	-298384096	471226	0	0
	4	81	0	4	4	5	0	5	7	0	11	1	3	1	8	0	19	170	8355537920	-600096640	486106	0	0
	2	144	1	4	1	7	3	4	6	3	25	0	2	2	0	0	7	159	9094423552	-659222592	486287	0	0
	2	175	0	5	4	18	0	7	1	0	13	0	11	0	8	0	10	99	8065393152	-165288832	463814	0	0
	2	144	1	4	0	5	2	5	7	3	25	0	2	2	0	0	7	159	9185411072	-772780416	498961	0	0
	1	144	1	4	0	8	3	4	8	3	24	0	5	1	0	3	6	159	9390997504	-683179776	486783	0	0
	1	144	0	4	0	2	1	5	7	3	25	0	4	1	0	0	5	119	9256093696	-856870336	505701	0	0
	2	176	1	3	0	21	1	4	0	3	12	0	11	0	8	0	8	97	8650162176	-340075008	471223	0	0
	1	125	1	4	0	6	2	5	7	3	24	0	4	1	0	0	6	158	9184964608	-731600640	497286	0	0
	2	144	1	4	1	8	4	4	7	3	25	0	2	2	1	1	6	158	9260156928	-622863744	481386	0	0
--------------------------------------------------
#Generation	No.	-->29
#Variable_vector	Fitness_vector	Constraint_violation	Overall_penalty
	1	202	2	2	5	4	0	8	6	1	16	0	14	0	6	0	5	0	8224205824	-175547360	486282	0	0
	2	175	1	3	4	18	0	7	1	0	12	0	13	0	8	0	8	58	8015321088	-151068832	470013	0	0
	2	176	1	4	4	12	1	4	0	3	12	0	11	0	8	0	8	99	8655080448	-279171264	469055	0	0
	3	147	4	1	6	0	6	4	2	5	17	0	2	2	8	0	19	20	9760504832	-980421184	521566	0	0
	4	105	0	4	3	5	2	5	14	0	15	1	1	5	5	0	0	67	8404386816	-630065792	503064	0	0
	3	158	1	3	3	20	0	7	10	0	25	0	13	0	3	0	15	25	7948856832	-142145152	475244	0	0
	3	107	1	4	5	6	4	4	11	2	29	0	4	0	6	0	17	173	9055492096	-522944256	475897	0	0
	3	141	0	4	3	5	2	5	14	0	15	1	0	5	5	0	0	67	8375839744	-628079872	503452	0	0
	3	142	1	3	3	20	0	7	11	0	25	0	14	0	3	0	15	25	7946874880	-137088480	476352	0	0
	2	175	1	3	3	13	0	4	0	3	14	0	14	0	8	0	8	74	8456500224	-292327360	474065	0	0
	4	78	0	5	5	5	0	4	5	1	8	1	3	1	8	0	17	160	8259917824	-195162496	465493	0	0
	3	116	1	4	5	6	4	4	9	1	29	0	4	1	6	0	17	173	8356082176	-168185872	460427	0	0
	3	116	0	4	5	1	5	4	14	0	14	1	4	1	1	0	4	188	8717646848	-898744320	510179	0	0
	3	149	4	1	6	0	5	4	2	5	17	0	2	2	8	0	19	27	9755137024	-975404160	531922	0	0
	2	176	1	4	0	20	1	4	0	3	12	0	11	0	8	0	8	97	8650428416	-360693696	471906	0	0
	3	147	4	1	6	0	5	4	2	5	17	0	2	2	8	0	19	15	9746557952	-970662272	533991	0	0
	3	141	0	4	2	0	2	5	14	0	15	1	0	5	5	0	0	67	9020439552	-933688448	553094	0	0
	4	73	1	3	5	3	0	4	5	1	9	1	4	1	8	0	18	134	8235795456	-236364000	472700	0	0
	3	108	1	4	4	6	5	4	11	2	29	0	4	0	6	0	17	173	9098160128	-565914880	478346	0	0
	3	149	4	1	6	0	6	4	2	5	17	0	2	2	8	0	19	68	9793101824	-997577600	513676	0	0
	3	119	0	4	5	1	5	4	14	0	14	1	4	1	1	0	4	162	8698506240	-893061824	513162	0	0
	2	175	0	5	2	15	0	4	0	3	13	0	13	0	8	0	9	98	8562036736	-303442880	479845	0	0
	1	145	0	4	0	2	1	5	8	3	24	0	4	1	0	3	6	159	9486565376	-869318272	501220	0	0
	1	144	0	5	2	8	4	3	7	3	23	0	3	1	0	0	6	155	9050136576	-547300736	484066	0	0
	2	144	1	4	1	7	4	4	7	3	25	0	2	2	0	0	6	158	9205066752	-659300224	483019	0	0
	3	141	0	4	3	4	2	6	14	0	15	1	1	3	5	0	0	67	8430225920	-692072064	506519	0	0
	2	142	0	4	0	2	1	5	8	3	24	0	4	1	0	0	6	159	9346871296	-868723840	501391	0	0
	1	125	1	4	0	7	2	5	7	3	24	0	4	1	0	3	6	158	9299759104	-700505152	493618	0	0
	2	141	4	1	6	2	4	4	1	5	18	0	2	2	8	0	19	129	9577373696	-785809600	495664	0	0
	3	141	0	4	2	4	1	5	14	0	15	1	0	5	5	0	0	67	8628476928	-705090176	511848	0	0
	3	108	1	4	4	6	6	4	11	2	29	0	4	0	6	0	16	145	9149031424	-556204032	478260	0	0
	2	175	1	3	3	13	0	4	0	3	14	0	14	0	8	0	8	95	8468215808	-298384096	471226	0	0
	4	81	0	4	4	5	0	5	7	0	11	1	3	1	8	0	19	170	8355537920	-600096640	486106	0	0
	2	144	1	4	1	7	3	4	6	3	25	0	2	2	0	0	7	159	9094423552	-659222592	486287	0	0
	2	175	0	5	4	18	0	7	1	0	13	0	11	0	8	0	10	99	8065393152	-165288832	463814	0	0
	1	144	0	4	0	2	1	5	7	3	25	0	4	1	0	0	5	119	9256093696	-856870336	505701	0	0
	2	176	1	3	0	21	1	4	0	3	12	0	11	0	8	0	8	97	8650162176	-340075008	471223	0	0
	1	125	1	4	0	6	2	5	7	3	24	0	4	1	0	0	6	158	9184964608	-731600640	497286	0	0
	2	144	1	4	1	8	4	4	7	3	25	0	2	2	1	1	6	158	9260156928	-622863744	481386	0	0
	0	169	2	2	0	1	4	5	8	3	15	0	3	2	6	0	19	50	9582507008	-947077376	516754	0	0
	1	152	2	2	0	1	5	4	9	3	15	0	2	2	7	0	19	67	9471837184	-939968512	518930	0	0
	4	78	0	5	5	1	5	4	14	0	15	1	5	1	1	0	5	194	8758863872	-896196672	510019	0	0
	2	147	1	4	0	6	2	6	8	3	24	0	5	1	0	0	6	158	9357636608	-757426496	495349	0	0
	4	81	0	5	5	5	0	5	4	0	11	1	3	1	8	0	19	145	8308177920	-561819904	489194	0	0
	3	147	4	1	6	2	6	4	2	5	17	0	2	2	8	0	19	125	9752757248	-801390400	490679	0	0
	2	145	0	4	3	12	1	5	6	3	23	0	4	1	0	0	6	159	9136367616	-345009088	467381	0	0
	3	141	0	5	3	6	2	5	14	0	14	1	0	5	5	0	0	67	8342532096	-578537536	499688	0	0
	1	144	1	4	0	8	3	4	8	3	24	0	5	1	0	3	6	159	9390997504	-683179776	486783	0	0
	3	147	4	1	6	0	5	4	2	5	17	0	2	2	8	0	19	111	9810606080	-1003767680	518466	0	0
	3	141	0	4	2	0	2	5	14	0	15	1	0	5	5	0	0	67	9020439552	-933688448	553094	0	0
--------------------------------------------------
#Generation	No.	-->30
#Variable_vector	Fitness_vector	Constraint_violation	Overall_penalty
	1	202	2	2	5	4	0	8	6	1	16	0	14	0	6	0	5	0	8224205824	-175547360	486282	0	0
	2	175	1	3	4	18	0	7	1	0	12	0	13	0	8	0	8	58	8015321088	-151068832	470013	0	0
	2	176	1	4	4	12	1	4	0	3	12	0	11	0	8	0	8	99	8655080448	-279171264	469055	0	0
	3	147	4	1	6	0	6	4	2	5	17	0	2	2	8	0	19	20	9760504832	-980421184	521566	0	0
	3	158	1	3	3	20	0	7	10	0	25	0	13	0	3	0	15	25	7948856832	-142145152	475244	0	0
	3	107	1	4	5	6	4	4	11	2	29	0	4	0	6	0	17	173	9055492096	-522944256	475897	0	0
	3	141	0	4	3	5	2	5	14	0	15	1	0	5	5	0	0	67	8375839744	-628079872	503452	0	0
	3	142	1	3	3	20	0	7	11	0	25	0	14	0	3	0	15	25	7946874880	-137088480	476352	0	0
	2	175	1	3	3	13	0	4	0	3	14	0	14	0	8	0	8	74	8456500224	-292327360	474065	0	0
	4	78	0	5	5	5	0	4	5	1	8	1	3	1	8	0	17	160	8259917824	-195162496	465493	0	0
	3	116	0	4	5	1	5	4	14	0	14	1	4	1	1	0	4	188	8717646848	-898744320	510179	0	0
	3	149	4	1	6	0	5	4	2	5	17	0	2	2	8	0	19	27	9755137024	-975404160	531922	0	0
	2	176	1	4	0	20	1	4	0	3	12	0	11	0	8	0	8	97	8650428416	-360693696	471906	0	0
	3	147	4	1	6	0	5	4	2	5	17	0	2	2	8	0	19	15	9746557952	-970662272	533991	0	0
	4	73	1	3	5	3	0	4	5	1	9	1	4	1	8	0	18	134	8235795456	-236364000	472700	0	0
	3	149	4	1	6	0	6	4	2	5	17	0	2	2	8	0	19	68	9793101824	-997577600	513676	0	0
	2	175	0	5	2	15	0	4	0	3	13	0	13	0	8	0	9	98	8562036736	-303442880	479845	0	0
	1	145	0	4	0	2	1	5	8	3	24	0	4	1	0	3	6	159	9486565376	-869318272	501220	0	0
	1	144	0	5	2	8	4	3	7	3	23	0	3	1	0	0	6	155	9050136576	-547300736	484066	0	0
	2	144	1	4	1	7	4	4	7	3	25	0	2	2	0	0	6	158	9205066752	-659300224	483019	0	0
	3	141	0	4	3	4	2	6	14	0	15	1	1	3	5	0	0	67	8430225920	-692072064	506519	0	0
	2	142	0	4	0	2	1	5	8	3	24	0	4	1	0	0	6	159	9346871296	-868723840	501391	0	0
	2	141	4	1	6	2	4	4	1	5	18	0	2	2	8	0	19	129	9577373696	-785809600	495664	0	0
	3	141	0	4	2	4	1	5	14	0	15	1	0	5	5	0	0	67	8628476928	-705090176	511848	0	0
	3	108	1	4	4	6	6	4	11	2	29	0	4	0	6	0	16	145	9149031424	-556204032	478260	0	0
	2	175	0	5	4	18	0	7	1	0	13	0	11	0	8	0	10	99	8065393152	-165288832	463814	0	0
	1	125	1	4	0	6	2	5	7	3	24	0	4	1	0	0	6	158	9184964608	-731600640	497286	0	0
	2	144	1	4	1	8	4	4	7	3	25	0	2	2	1	1	6	158	9260156928	-622863744	481386	0	0
	0	169	2	2	0	1	4	5	8	3	15	0	3	2	6	0	19	50	9582507008	-947077376	516754	0	0
	1	152	2	2	0	1	5	4	9	3	15	0	2	2	7	0	19	67	9471837184	-939968512	518930	0	0
	4	78	0	5	5	1	5	4	14	0	15	1	5	1	1	0	5	194	8758863872	-896196672	510019	0	0
	2	147	1	4	0	6	2	6	8	3	24	0	5	1	0	0	6	158	9357636608	-757426496	495349	0	0
	4	81	0	5	5	5	0	5	4	0	11	1	3	1	8	0	19	145	8308177920	-561819904	489194	0	0
	3	147	4	1	6	2	6	4	2	5	17	0	2	2	8	0	19	125	9752757248	-801390400	490679	0	0
	1	144	1	4	0	8	3	4	8	3	24	0	5	1	0	3	6	159	9390997504	-683179776	486783	0	0
	3	147	4	1	6	0	5	4	2	5	17	0	2	2	8	0	19	111	9810606080	-1003767680	518466	0	0
	3	141	0	4	2	0	2	5	14	0	15	1	0	5	5	0	0	67	9020439552	-933688448	553094	0	0
	1	145	0	4	0	2	1	5	7	3	25	0	4	1	0	0	5	119	9255197696	-857277504	505602	0	0
	4	81	0	4	4	5	0	5	7	0	11	1	3	1	8	0	19	170	8355537920	-600096640	486106	0	0
	3	145	0	4	3	12	1	5	6	3	23	0	4	1	0	0	6	159	9121055744	-346069312	467054	0	0
	2	141	1	4	0	8	3	4	8	3	24	0	5	1	0	0	6	159	9250755584	-682635776	486937	0	0
	3	141	0	4	3	4	1	5	14	0	14	1	0	4	5	0	0	67	8534128640	-674911872	505252	0	0
	3	141	0	4	2	0	2	5	14	0	15	1	0	5	5	0	0	67	9020439552	-933688448	553094	0	0
	1	125	1	4	0	7	2	5	7	3	24	0	4	1	0	3	6	158	9299759104	-700505152	493618	0	0
	3	116	1	4	5	6	4	4	8	1	29	0	4	1	6	0	17	173	8315349504	-169928432	458895	0	0
	2	117	4	1	6	1	6	4	2	5	17	0	2	2	8	0	19	74	9783783424	-869415296	507346	0	0
	3	141	0	4	2	4	1	5	14	0	15	1	0	5	5	0	0	159	8674969600	-728963840	500653	0	0
	4	105	0	4	3	5	2	5	14	0	15	1	1	5	5	0	0	67	8404386816	-630065792	503064	0	0
	2	175	1	3	4	18	0	7	1	0	12	0	14	0	8	0	8	58	8015321088	-151068832	470013	0	0
	4	74	0	4	5	3	0	4	6	1	9	1	4	1	8	0	18	134	8250084864	-210310112	471329	0	0
--------------------------------------------------
#Generation	No.	-->31
#Variable_vector	Fitness_vector	Constraint_violation	Overall_penalty
	1	202	2	2	5	4	0	8	6	1	16	0	14	0	6	0	5	0	8224205824	-175547360	486282	0	0
	2	175	1	3	4	18	0	7	1	0	12	0	13	0	8	0	8	58	8015321088	-151068832	470013	0	0
	2	176	1	4	4	12	1	4	0	3	12	0	11	0	8	0	8	99	8655080448	-279171264	469055	0	0
	3	147	4	1	6	0	6	4	2	5	17	0	2	2	8	0	19	20	9760504832	-980421184	521566	0	0
	3	158	1	3	3	20	0	7	10	0	25	0	13	0	3	0	15	25	7948856832	-142145152	475244	0	0
	3	107	1	4	5	6	4	4	11	2	29	0	4	0	6	0	17	173	9055492096	-522944256	475897	0	0
	3	142	1	3	3	20	0	7	11	0	25	0	14	0	3	0	15	25	7946874880	-137088480	476352	0	0
	2	175	1	3	3	13	0	4	0	3	14	0	14	0	8	0	8	74	8456500224	-292327360	474065	0	0
	4	78	0	5	5	5	0	4	5	1	8	1	3	1	8	0	17	160	8259917824	-195162496	465493	0	0
	3	116	0	4	5	1	5	4	14	0	14	1	4	1	1	0	4	188	8717646848	-898744320	510179	0	0
	3	149	4	1	6	0	5	4	2	5	17	0	2	2	8	0	19	27	9755137024	-975404160	531922	0	0
	2	176	1	4	0	20	1	4	0	3	12	0	11	0	8	0	8	97	8650428416	-360693696	471906	0	0
	3	147	4	1	6	0	5	4	2	5	17	0	2	2	8	0	19	15	9746557952	-970662272	533991	0	0
	4	73	1	3	5	3	0	4	5	1	9	1	4	1	8	0	18	134	8235795456	-236364000	472700	0	0
	3	149	4	1	6	0	6	4	2	5	17	0	2	2	8	0	19	68	9793101824	-997577600	513676	0	0
	2	175	0	5	2	15	0	4	0	3	13	0	13	0	8	0	9	98	8562036736	-303442880	479845	0	0
	1	145	0	4	0	2	1	5	8	3	24	0	4	1	0	3	6	159	9486565376	-869318272	501220	0	0
	1	144	0	5	2	8	4	3	7	3	23	0	3	1	0	0	6	155	9050136576	-547300736	484066	0	0
	2	144	1	4	1	7	4	4	7	3	25	0	2	2	0	0	6	158	9205066752	-659300224	483019	0	0
	3	141	0	4	3	4	2	6	14	0	15	1	1	3	5	0	0	67	8430225920	-692072064	506519	0	0
	2	142	0	4	0	2	1	5	8	3	24	0	4	1	0	0	6	159	9346871296	-868723840	501391	0	0
	2	141	4	1	6	2	4	4	1	5	18	0	2	2	8	0	19	129	9577373696	-785809600	495664	0	0
	2	175	0	5	4	18	0	7	1	0	13	0	11	0	8	0	10	99	8065393152	-165288832	463814	0	0
	1	125	1	4	0	6	2	5	7	3	24	0	4	1	0	0	6	158	9184964608	-731600640	497286	0	0
	2	144	1	4	1	8	4	4	7	3	25	0	2	2	1	1	6	158	9260156928	-622863744	481386	0	0
	0	169	2	2	0	1	4	5	8	3	15	0	3	2	6	0	19	50	9582507008	-947077376	516754	0	0
	1	152	2	2	0	1	5	4	9	3	15	0	2	2	7	0	19	67	9471837184	-939968512	518930	0	0
	4	78	0	5	5	1	5	4	14	0	15	1	5	1	1	0	5	194	8758863872	-896196672	510019	0	0
	2	147	1	4	0	6	2	6	8	3	24	0	5	1	0	0	6	158	9357636608	-757426496	495349	0	0
	4	81	0	5	5	5	0	5	4	0	11	1	3	1	8	0	19	145	8308177920	-561819904	489194	0	0
	3	147	4	1	6	2	6	4	2	5	17	0	2	2	8	0	19	125	9752757248	-801390400	490679	0	0
	1	144	1	4	0	8	3	4	8	3	24	0	5	1	0	3	6	159	9390997504	-683179776	486783	0	0
	3	147	4	1	6	0	5	4	2	5	17	0	2	2	8	0	19	111	9810606080	-1003767680	518466	0	0
	3	141	0	4	2	0	2	5	14	0	15	1	0	5	5	0	0	67	9020439552	-933688448	553094	0	0
	1	145	0	4	0	2	1	5	7	3	25	0	4	1	0	0	5	119	9255197696	-857277504	505602	0	0
	3	145	0	4	3	12	1	5	6	3	23	0	4	1	0	0	6	159	9121055744	-346069312	467054	0	0
	2	141	1	4	0	8	3	4	8	3	24	0	5	1	0	0	6	159	9250755584	-682635776	486937	0	0
	3	116	1	4	5	6	4	4	8	1	29	0	4	1	6	0	17	173	8315349504	-169928432	458895	0	0
	2	117	4	1	6	1	6	4	2	5	17	0	2	2	8	0	19	74	9783783424	-869415296	507346	0	0
	3	141	0	4	2	4	1	5	14	0	15	1	0	5	5	0	0	159	8674969600	-728963840	500653	0	0
	2	175	1	3	4	18	0	7	1	0	12	0	14	0	8	0	8	58	8015321088	-151068832	470013	0	0
	4	74	0	4	5	3	0	4	6	1	9	1	4	1	8	0	18	134	8250084864	-210310112	471329	0	0
	1	144	1	4	0	4	3	4	8	3	24	0	4	1	0	0	6	159	9316641792	-816139008	500039	0	0
	3	141	4	1	6	0	5	4	2	5	18	0	2	2	8	0	18	75	9787083776	-988867584	524939	0	0
	3	147	0	4	3	5	2	5	14	0	14	1	1	3	5	0	1	114	8364839936	-643022848	497377	0	0
	3	147	4	1	4	2	6	4	2	5	17	0	2	2	8	0	19	110	9734273024	-827815616	492272	0	0
	4	72	1	3	5	3	0	4	5	1	8	1	4	1	8	0	18	135	8232340992	-235713824	472823	0	0
	4	82	0	4	4	5	0	5	7	0	11	1	3	1	8	0	18	172	8351905280	-600610304	486027	0	0
	3	136	0	4	5	3	5	4	14	0	14	1	4	1	1	0	4	149	8479858176	-721994112	495564	0	0
	3	141	0	4	3	0	2	5	14	0	15	1	0	5	5	0	0	70	9021963264	-934466944	552729	0	0
--------------------------------------------------
#Generation	No.	-->32
#Variable_vector	Fitness_vector	Constraint_violation	Overall_penalty
	1	202	2	2	5	4	0	8	6	1	16	0	14	0	6	0	5	0	8224205824	-175547360	486282	0	0
	2	175	1	3	4	18	0	7	1	0	12	0	13	0	8	0	8	58	8015321088	-151068832	470013	0	0
	2	176	1	4	4	12	1	4	0	3	12	0	11	0	8	0	8	99	8655080448	-279171264	469055	0	0
	3	158	1	3	3	20	0	7	10	0	25	0	13	0	3	0	15	25	7948856832	-142145152	475244	0	0
	3	142	1	3	3	20	0	7	11	0	25	0	14	0	3	0	15	25	7946874880	-137088480	476352	0	0
	2	175	1	3	3	13	0	4	0	3	14	0	14	0	8	0	8	74	8456500224	-292327360	474065	0	0
	4	78	0	5	5	5	0	4	5	1	8	1	3	1	8	0	17	160	8259917824	-195162496	465493	0	0
	3	116	0	4	5	1	5	4	14	0	14	1	4	1	1	0	4	188	8717646848	-898744320	510179	0	0
	2	176	1	4	0	20	1	4	0	3	12	0	11	0	8	0	8	97	8650428416	-360693696	471906	0	0
	4	73	1	3	5	3	0	4	5	1	9	1	4	1	8	0	18	134	8235795456	-236364000	472700	0	0
	1	145	0	4	0	2	1	5	8	3	24	0	4	1	0	3	6	159	9486565376	-869318272	501220	0	0
	1	144	0	5	2	8	4	3	7	3	23	0	3	1	0	0	6	155	9050136576	-547300736	484066	0	0
	3	141	0	4	3	4	2	6	14	0	15	1	1	3	5	0	0	67	8430225920	-692072064	506519	0	0
	2	141	4	1	6	2	4	4	1	5	18	0	2	2	8	0	19	129	9577373696	-785809600	495664	0	0
	2	175	0	5	4	18	0	7	1	0	13	0	11	0	8	0	10	99	8065393152	-165288832	463814	0	0
	1	125	1	4	0	6	2	5	7	3	24	0	4	1	0	0	6	158	9184964608	-731600640	497286	0	0
	2	144	1	4	1	8	4	4	7	3	25	0	2	2	1	1	6	158	9260156928	-622863744	481386	0	0
	4	78	0	5	5	1	5	4	14	0	15	1	5	1	1	0	5	194	8758863872	-896196672	510019	0	0
	2	147	1	4	0	6	2	6	8	3	24	0	5	1	0	0	6	158	9357636608	-757426496	495349	0	0
	4	81	0	5	5	5	0	5	4	0	11	1	3	1	8	0	19	145	8308177920	-561819904	489194	0	0
	3	147	4	1	6	2	6	4	2	5	17	0	2	2	8	0	19	125	9752757248	-801390400	490679	0	0
	1	144	1	4	0	8	3	4	8	3	24	0	5	1	0	3	6	159	9390997504	-683179776	486783	0	0
	3	147	4	1	6	0	5	4	2	5	17	0	2	2	8	0	19	111	9810606080	-1003767680	518466	0	0
	3	141	0	4	2	0	2	5	14	0	15	1	0	5	5	0	0	67	9020439552	-933688448	553094	0	0
	3	145	0	4	3	12	1	5	6	3	23	0	4	1	0	0	6	159	9121055744	-346069312	467054	0	0
	3	116	1	4	5	6	4	4	8	1	29	0	4	1	6	0	17	173	8315349504	-169928432	458895	0	0
	3	141	0	4	2	4	1	5	14	0	15	1	0	5	5	0	0	159	8674969600	-728963840	500653	0	0
	2	175	1	3	4	18	0	7	1	0	12	0	14	0	8	0	8	58	8015321088	-151068832	470013	0	0
	4	74	0	4	5	3	0	4	6	1	9	1	4	1	8	0	18	134	8250084864	-210310112	471329	0	0
	1	144	1	4	0	4	3	4	8	3	24	0	4	1	0	0	6	159	9316641792	-816139008	500039	0	0
	4	72	1	3	5	3	0	4	5	1	8	1	4	1	8	0	18	135	8232340992	-235713824	472823	0	0
	3	136	0	4	5	3	5	4	14	0	14	1	4	1	1	0	4	149	8479858176	-721994112	495564	0	0
	3	141	0	4	3	0	2	5	14	0	15	1	0	5	5	0	0	70	9021963264	-934466944	552729	0	0
	3	107	1	4	5	6	4	4	11	2	29	0	4	0	6	0	17	173	9055492096	-522944256	475897	0	0
	2	146	4	1	6	3	5	4	2	5	17	0	2	2	8	0	19	130	9698741248	-713517568	492733	0	0
	3	141	0	4	4	4	2	6	14	0	15	1	1	3	5	0	1	83	8423929856	-664271104	501415	0	0
	3	147	4	1	6	0	5	4	2	5	17	0	2	2	8	0	19	113	9811935232	-1004457408	518143	0	0
	2	147	1	4	0	6	2	6	8	3	24	0	5	1	0	0	5	159	9356786688	-756729152	495676	0	0
	2	147	1	4	0	6	2	6	8	3	24	0	5	1	0	0	5	83	9315899392	-735713664	505531	0	0
	4	82	0	4	4	5	0	5	7	0	11	1	3	1	8	0	18	172	8351905280	-600610304	486027	0	0
	3	147	0	4	3	5	2	5	14	0	14	1	1	3	5	0	1	114	8364839936	-643022848	497377	0	0
	2	141	4	1	6	1	6	4	2	5	17	0	2	2	8	0	19	123	9789775872	-896905536	496891	0	0
	3	149	4	1	6	1	6	4	2	5	17	0	2	2	8	0	19	77	9742738432	-884802432	503397	0	0
	2	144	1	4	0	7	4	4	7	3	26	0	2	2	0	0	5	151	9211084800	-711519616	486784	0	0
	2	141	0	5	2	8	5	3	7	3	23	0	3	1	0	0	6	155	9074768896	-555907200	485639	0	0
	1	145	0	4	0	2	1	5	7	3	25	0	4	1	0	0	4	95	9242179584	-850667776	508702	0	0
	4	81	1	4	5	6	0	7	7	0	11	1	3	1	8	0	18	172	8405611008	-526610496	478861	0	0
	1	145	0	4	0	2	1	5	8	3	24	0	4	1	0	2	6	159	9441031168	-869318272	501222	0	0
	3	147	0	4	3	5	2	5	14	0	14	1	1	3	5	0	0	38	8325198848	-622652416	506930	0	0
	3	147	4	1	6	0	6	4	2	4	17	0	2	2	8	0	19	79	9445194752	-1000767168	510175	0	0
--------------------------------------------------
#Generation	No.	-->33
#Variable_vector	Fitness_vector	Constraint_violation	Overall_penalty
	2	175	1	3	4	18	0	7	1	0	12	0	13	0	8	0	8	58	8015321088	-151068832	470013	0	0
	2	176	1	4	4	12	1	4	0	3	12	0	11	0	8	0	8	99	8655080448	-279171264	469055	0	0
	3	158	1	3	3	20	0	7	10	0	25	0	13	0	3	0	15	25	7948856832	-142145152	475244	0	0
	3	142	1	3	3	20	0	7	11	0	25	0	14	0	3	0	15	25	7946874880	-137088480	476352	0	0
	2	175	1	3	3	13	0	4	0	3	14	0	14	0	8	0	8	74	8456500224	-292327360	474065	0	0
	4	78	0	5	5	5	0	4	5	1	8	1	3	1	8	0	17	160	8259917824	-195162496	465493	0	0
	3	116	0	4	5	1	5	4	14	0	14	1	4	1	1	0	4	188	8717646848	-898744320	510179	0	0
	2	176	1	4	0	20	1	4	0	3	12	0	11	0	8	0	8	97	8650428416	-360693696	471906	0	0
	1	145	0	4	0	2	1	5	8	3	24	0	4	1	0	3	6	159	9486565376	-869318272	501220	0	0
	1	144	0	5	2	8	4	3	7	3	23	0	3	1	0	0	6	155	9050136576	-547300736	484066	0	0
	3	141	0	4	3	4	2	6	14	0	15	1	1	3	5	0	0	67	8430225920	-692072064	506519	0	0
	2	141	4	1	6	2	4	4	1	5	18	0	2	2	8	0	19	129	9577373696	-785809600	495664	0	0
	2	175	0	5	4	18	0	7	1	0	13	0	11	0	8	0	10	99	8065393152	-165288832	463814	0	0
	1	125	1	4	0	6	2	5	7	3	24	0	4	1	0	0	6	158	9184964608	-731600640	497286	0	0
	2	144	1	4	1	8	4	4	7	3	25	0	2	2	1	1	6	158	9260156928	-622863744	481386	0	0
	2	147	1	4	0	6	2	6	8	3	24	0	5	1	0	0	6	158	9357636608	-757426496	495349	0	0
	4	81	0	5	5	5	0	5	4	0	11	1	3	1	8	0	19	145	8308177920	-561819904	489194	0	0
	3	147	4	1	6	2	6	4	2	5	17	0	2	2	8	0	19	125	9752757248	-801390400	490679	0	0
	3	147	4	1	6	0	5	4	2	5	17	0	2	2	8	0	19	111	9810606080	-1003767680	518466	0	0
	3	141	0	4	2	0	2	5	14	0	15	1	0	5	5	0	0	67	9020439552	-933688448	553094	0	0
	3	145	0	4	3	12	1	5	6	3	23	0	4	1	0	0	6	159	9121055744	-346069312	467054	0	0
	3	116	1	4	5	6	4	4	8	1	29	0	4	1	6	0	17	173	8315349504	-169928432	458895	0	0
	3	141	0	4	2	4	1	5	14	0	15	1	0	5	5	0	0	159	8674969600	-728963840	500653	0	0
	4	74	0	4	5	3	0	4	6	1	9	1	4	1	8	0	18	134	8250084864	-210310112	471329	0	0
	3	136	0	4	5	3	5	4	14	0	14	1	4	1	1	0	4	149	8479858176	-721994112	495564	0	0
	3	141	0	4	3	0	2	5	14	0	15	1	0	5	5	0	0	70	9021963264	-934466944	552729	0	0
	2	146	4	1	6	3	5	4	2	5	17	0	2	2	8	0	19	130	9698741248	-713517568	492733	0	0
	3	141	0	4	4	4	2	6	14	0	15	1	1	3	5	0	1	83	8423929856	-664271104	501415	0	0
	3	147	4	1	6	0	5	4	2	5	17	0	2	2	8	0	19	113	9811935232	-1004457408	518143	0	0
	2	147	1	4	0	6	2	6	8	3	24	0	5	1	0	0	5	159	9356786688	-756729152	495676	0	0
	4	82	0	4	4	5	0	5	7	0	11	1	3	1	8	0	18	172	8351905280	-600610304	486027	0	0
	3	147	0	4	3	5	2	5	14	0	14	1	1	3	5	0	1	114	8364839936	-643022848	497377	0	0
	2	141	4	1	6	1	6	4	2	5	17	0	2	2	8	0	19	123	9789775872	-896905536	496891	0	0
	3	149	4	1	6	1	6	4	2	5	17	0	2	2	8	0	19	77	9742738432	-884802432	503397	0	0
	2	144	1	4	0	7	4	4	7	3	26	0	2	2	0	0	5	151	9211084800	-711519616	486784	0	0
	2	141	0	5	2	8	5	3	7	3	23	0	3	1	0	0	6	155	9074768896	-555907200	485639	0	0
	1	145	0	4	0	2	1	5	7	3	25	0	4	1	0	0	4	95	9242179584	-850667776	508702	0	0
	4	81	1	4	5	6	0	7	7	0	11	1	3	1	8	0	18	172	8405611008	-526610496	478861	0	0
	1	145	0	4	0	2	1	5	8	3	24	0	4	1	0	2	6	159	9441031168	-869318272	501222	0	0
	3	147	4	1	6	0	6	4	2	4	17	0	2	2	8	0	19	79	9445194752	-1000767168	510175	0	0
	2	147	0	4	3	5	2	6	14	0	14	1	1	3	5	0	1	160	8454327808	-662199872	490122	0	0
	4	76	1	3	5	3	0	4	5	1	8	1	4	1	8	0	18	134	8218054656	-238873024	472147	0	0
	3	107	1	4	5	6	4	4	10	2	29	0	4	0	6	0	17	173	8938802176	-522944256	475814	0	0
	2	144	1	4	0	4	3	4	8	3	24	0	5	1	0	0	6	159	9321461760	-816562688	499966	0	0
	3	147	4	1	6	0	6	4	2	5	18	0	2	2	8	0	19	121	9827894272	-1015250816	505233	0	0
	4	81	0	4	5	1	5	4	14	0	15	1	5	1	1	0	5	194	8736162816	-898648448	509096	0	0
	2	146	4	1	6	3	5	4	2	5	17	0	2	2	8	0	19	130	9698741248	-713517568	492733	0	0
	1	144	1	4	0	4	3	4	7	3	24	0	4	1	0	0	6	159	9250394112	-816139008	499376	0	0
	2	175	0	4	4	18	0	7	1	0	13	0	11	0	8	0	9	59	8030061056	-151324512	470212	0	0
	2	175	1	4	4	18	0	7	1	0	12	0	14	0	8	0	9	106	8053806080	-164854048	463730	0	0
--------------------------------------------------
#Generation	No.	-->34
#Variable_vector	Fitness_vector	Constraint_violation	Overall_penalty
	2	175	1	3	4	18	0	7	1	0	12	0	13	0	8	0	8	58	8015321088	-151068832	470013	0	0
	2	176	1	4	4	12	1	4	0	3	12	0	11	0	8	0	8	99	8655080448	-279171264	469055	0	0
	3	158	1	3	3	20	0	7	10	0	25	0	13	0	3	0	15	25	7948856832	-142145152	475244	0	0
	3	142	1	3	3	20	0	7	11	0	25	0	14	0	3	0	15	25	7946874880	-137088480	476352	0	0
	2	175	1	3	3	13	0	4	0	3	14	0	14	0	8	0	8	74	8456500224	-292327360	474065	0	0
	4	78	0	5	5	5	0	4	5	1	8	1	3	1	8	0	17	160	8259917824	-195162496	465493	0	0
	2	176	1	4	0	20	1	4	0	3	12	0	11	0	8	0	8	97	8650428416	-360693696	471906	0	0
	1	145	0	4	0	2	1	5	8	3	24	0	4	1	0	3	6	159	9486565376	-869318272	501220	0	0
	1	144	0	5	2	8	4	3	7	3	23	0	3	1	0	0	6	155	9050136576	-547300736	484066	0	0
	3	141	0	4	3	4	2	6	14	0	15	1	1	3	5	0	0	67	8430225920	-692072064	506519	0	0
	2	141	4	1	6	2	4	4	1	5	18	0	2	2	8	0	19	129	9577373696	-785809600	495664	0	0
	2	175	0	5	4	18	0	7	1	0	13	0	11	0	8	0	10	99	8065393152	-165288832	463814	0	0
	1	125	1	4	0	6	2	5	7	3	24	0	4	1	0	0	6	158	9184964608	-731600640	497286	0	0
	2	144	1	4	1	8	4	4	7	3	25	0	2	2	1	1	6	158	9260156928	-622863744	481386	0	0
	2	147	1	4	0	6	2	6	8	3	24	0	5	1	0	0	6	158	9357636608	-757426496	495349	0	0
	4	81	0	5	5	5	0	5	4	0	11	1	3	1	8	0	19	145	8308177920	-561819904	489194	0	0
	3	147	4	1	6	2	6	4	2	5	17	0	2	2	8	0	19	125	9752757248	-801390400	490679	0	0
	3	147	4	1	6	0	5	4	2	5	17	0	2	2	8	0	19	111	9810606080	-1003767680	518466	0	0
	3	141	0	4	2	0	2	5	14	0	15	1	0	5	5	0	0	67	9020439552	-933688448	553094	0	0
	3	145	0	4	3	12	1	5	6	3	23	0	4	1	0	0	6	159	9121055744	-346069312	467054	0	0
	3	116	1	4	5	6	4	4	8	1	29	0	4	1	6	0	17	173	8315349504	-169928432	458895	0	0
	3	141	0	4	2	4	1	5	14	0	15	1	0	5	5	0	0	159	8674969600	-728963840	500653	0	0
	4	74	0	4	5	3	0	4	6	1	9	1	4	1	8	0	18	134	8250084864	-210310112	471329	0	0
	3	136	0	4	5	3	5	4	14	0	14	1	4	1	1	0	4	149	8479858176	-721994112	495564	0	0
	3	141	0	4	3	0	2	5	14	0	15	1	0	5	5	0	0	70	9021963264	-934466944	552729	0	0
	3	141	0	4	4	4	2	6	14	0	15	1	1	3	5	0	1	83	8423929856	-664271104	501415	0	0
	3	147	4	1	6	0	5	4	2	5	17	0	2	2	8	0	19	113	9811935232	-1004457408	518143	0	0
	4	82	0	4	4	5	0	5	7	0	11	1	3	1	8	0	18	172	8351905280	-600610304	486027	0	0
	3	147	0	4	3	5	2	5	14	0	14	1	1	3	5	0	1	114	8364839936	-643022848	497377	0	0
	2	141	4	1	6	1	6	4	2	5	17	0	2	2	8	0	19	123	9789775872	-896905536	496891	0	0
	1	145	0	4	0	2	1	5	7	3	25	0	4	1	0	0	4	95	9242179584	-850667776	508702	0	0
	4	81	1	4	5	6	0	7	7	0	11	1	3	1	8	0	18	172	8405611008	-526610496	478861	0	0
	3	147	4	1	6	0	6	4	2	4	17	0	2	2	8	0	19	79	9445194752	-1000767168	510175	0	0
	2	147	0	4	3	5	2	6	14	0	14	1	1	3	5	0	1	160	8454327808	-662199872	490122	0	0
	4	76	1	3	5	3	0	4	5	1	8	1	4	1	8	0	18	134	8218054656	-238873024	472147	0	0
	3	107	1	4	5	6	4	4	10	2	29	0	4	0	6	0	17	173	8938802176	-522944256	475814	0	0
	2	144	1	4	0	4	3	4	8	3	24	0	5	1	0	0	6	159	9321461760	-816562688	499966	0	0
	3	147	4	1	6	0	6	4	2	5	18	0	2	2	8	0	19	121	9827894272	-1015250816	505233	0	0
	4	81	0	4	5	1	5	4	14	0	15	1	5	1	1	0	5	194	8736162816	-898648448	509096	0	0
	1	144	1	4	0	4	3	4	7	3	24	0	4	1	0	0	6	159	9250394112	-816139008	499376	0	0
	2	175	1	4	4	18	0	7	1	0	12	0	14	0	8	0	9	106	8053806080	-164854048	463730	0	0
	3	121	0	4	5	1	5	4	14	0	14	1	4	1	1	0	4	188	8709153792	-901225792	509538	0	0
	2	139	1	4	0	6	1	5	7	3	24	0	4	1	0	0	6	158	9211270144	-732481408	487457	0	0
	4	82	0	4	5	5	0	5	7	0	11	1	3	1	8	0	18	172	8312361472	-570954752	484780	0	0
	4	82	1	3	3	5	1	5	7	1	11	1	3	1	8	0	17	169	8551382528	-194994176	460332	0	0
	3	147	4	1	6	1	6	4	2	4	17	0	2	2	8	0	19	79	9396915200	-884888320	502144	0	0
	2	149	0	4	0	2	2	6	8	3	24	0	5	1	0	3	6	149	9561742336	-915836032	509911	0	0
	2	176	1	4	0	20	1	4	0	3	12	0	12	0	8	0	8	97	8650428416	-360693696	471906	0	0
	4	83	0	4	4	5	0	5	8	0	11	1	3	1	8	0	17	134	8322378240	-588284672	491956	0	0
	2	147	1	4	0	4	3	4	8	3	24	0	5	1	1	1	4	161	9372959744	-817325760	499881	0	0
--------------------------------------------------
#Generation	No.	-->35
#Variable_vector	Fitness_vector	Constraint_violation	Overall_penalty
	2	175	1	3	4	18	0	7	1	0	12	0	13	0	8	0	8	58	8015321088	-151068832	470013	0	0
	2	176	1	4	4	12	1	4	0	3	12	0	11	0	8	0	8	99	8655080448	-279171264	469055	0	0
	3	158	1	3	3	20	0	7	10	0	25	0	13	0	3	0	15	25	7948856832	-142145152	475244	0	0
	2	175	1	3	3	13	0	4	0	3	14	0	14	0	8	0	8	74	8456500224	-292327360	474065	0	0
	4	78	0	5	5	5	0	4	5	1	8	1	3	1	8	0	17	160	8259917824	-195162496	465493	0	0
	2	176	1	4	0	20	1	4	0	3	12	0	11	0	8	0	8	97	8650428416	-360693696	471906	0	0
	1	145	0	4	0	2	1	5	8	3	24	0	4	1	0	3	6	159	9486565376	-869318272	501220	0	0
	1	144	0	5	2	8	4	3	7	3	23	0	3	1	0	0	6	155	9050136576	-547300736	484066	0	0
	3	141	0	4	3	4	2	6	14	0	15	1	1	3	5	0	0	67	8430225920	-692072064	506519	0	0
	2	141	4	1	6	2	4	4	1	5	18	0	2	2	8	0	19	129	9577373696	-785809600	495664	0	0
	2	175	0	5	4	18	0	7	1	0	13	0	11	0	8	0	10	99	8065393152	-165288832	463814	0	0
	2	144	1	4	1	8	4	4	7	3	25	0	2	2	1	1	6	158	9260156928	-622863744	481386	0	0
	2	147	1	4	0	6	2	6	8	3	24	0	5	1	0	0	6	158	9357636608	-757426496	495349	0	0
	4	81	0	5	5	5	0	5	4	0	11	1	3	1	8	0	19	145	8308177920	-561819904	489194	0	0
	3	147	4	1	6	2	6	4	2	5	17	0	2	2	8	0	19	125	9752757248	-801390400	490679	0	0
	3	147	4	1	6	0	5	4	2	5	17	0	2	2	8	0	19	111	9810606080	-1003767680	518466	0	0
	3	141	0	4	2	0	2	5	14	0	15	1	0	5	5	0	0	67	9020439552	-933688448	553094	0	0
	3	145	0	4	3	12	1	5	6	3	23	0	4	1	0	0	6	159	9121055744	-346069312	467054	0	0
	3	116	1	4	5	6	4	4	8	1	29	0	4	1	6	0	17	173	8315349504	-169928432	458895	0	0
	4	74	0	4	5	3	0	4	6	1	9	1	4	1	8	0	18	134	8250084864	-210310112	471329	0	0
	3	136	0	4	5	3	5	4	14	0	14	1	4	1	1	0	4	149	8479858176	-721994112	495564	0	0
	3	141	0	4	3	0	2	5	14	0	15	1	0	5	5	0	0	70	9021963264	-934466944	552729	0	0
	3	141	0	4	4	4	2	6	14	0	15	1	1	3	5	0	1	83	8423929856	-664271104	501415	0	0
	3	147	4	1	6	0	5	4	2	5	17	0	2	2	8	0	19	113	9811935232	-1004457408	518143	0	0
	4	82	0	4	4	5	0	5	7	0	11	1	3	1	8	0	18	172	8351905280	-600610304	486027	0	0
	3	147	0	4	3	5	2	5	14	0	14	1	1	3	5	0	1	114	8364839936	-643022848	497377	0	0
	1	145	0	4	0	2	1	5	7	3	25	0	4	1	0	0	4	95	9242179584	-850667776	508702	0	0
	4	81	1	4	5	6	0	7	7	0	11	1	3	1	8	0	18	172	8405611008	-526610496	478861	0	0
	3	147	4	1	6	0	6	4	2	4	17	0	2	2	8	0	19	79	9445194752	-1000767168	510175	0	0
	4	76	1	3	5	3	0	4	5	1	8	1	4	1	8	0	18	134	8218054656	-238873024	472147	0	0
	3	107	1	4	5	6	4	4	10	2	29	0	4	0	6	0	17	173	8938802176	-522944256	475814	0	0
	3	147	4	1	6	0	6	4	2	5	18	0	2	2	8	0	19	121	9827894272	-1015250816	505233	0	0
	4	81	0	4	5	1	5	4	14	0	15	1	5	1	1	0	5	194	8736162816	-898648448	509096	0	0
	3	121	0	4	5	1	5	4	14	0	14	1	4	1	1	0	4	188	8709153792	-901225792	509538	0	0
	2	139	1	4	0	6	1	5	7	3	24	0	4	1	0	0	6	158	9211270144	-732481408	487457	0	0
	4	82	0	4	5	5	0	5	7	0	11	1	3	1	8	0	18	172	8312361472	-570954752	484780	0	0
	4	82	1	3	3	5	1	5	7	1	11	1	3	1	8	0	17	169	8551382528	-194994176	460332	0	0
	3	147	4	1	6	1	6	4	2	4	17	0	2	2	8	0	19	79	9396915200	-884888320	502144	0	0
	2	176	1	4	0	20	1	4	0	3	12	0	12	0	8	0	8	97	8650428416	-360693696	471906	0	0
	4	83	0	4	4	5	0	5	8	0	11	1	3	1	8	0	17	134	8322378240	-588284672	491956	0	0
	3	139	1	4	0	3	1	5	7	3	24	0	4	1	0	0	6	151	9238005760	-830584960	497572	0	0
	2	139	1	4	1	5	1	5	7	3	24	0	4	1	1	0	6	149	9204936704	-720653440	489214	0	0
	4	78	1	4	5	5	0	6	5	1	7	1	3	1	8	0	17	160	8453044736	-195939136	466604	0	0
	1	145	0	4	2	6	4	3	7	3	24	0	3	1	0	0	6	155	9052079104	-617749120	489056	0	0
	3	141	0	4	2	4	1	5	14	0	15	1	0	5	5	0	0	159	8674969600	-728963840	500653	0	0
	3	145	0	4	3	12	1	5	6	3	24	0	4	1	0	0	7	160	9121932288	-346274688	466959	0	0
	3	145	1	3	3	20	0	7	10	0	25	0	13	0	3	0	15	25	7946643456	-138122016	476131	0	0
	3	142	4	1	6	1	6	4	2	4	18	0	2	2	8	0	19	82	9400076288	-884167808	502048	0	0
	1	152	1	4	0	2	2	6	8	3	24	0	5	1	0	3	6	149	9561322496	-916445952	509585	0	0
	1	142	1	4	1	8	1	5	7	3	25	0	4	1	0	0	6	158	9177859072	-617080576	479365	0	0
--------------------------------------------------
#Generation	No.	-->36
#Variable_vector	Fitness_vector	Constraint_violation	Overall_penalty
	2	175	1	3	4	18	0	7	1	0	12	0	13	0	8	0	8	58	8015321088	-151068832	470013	0	0
	2	176	1	4	4	12	1	4	0	3	12	0	11	0	8	0	8	99	8655080448	-279171264	469055	0	0
	4	78	0	5	5	5	0	4	5	1	8	1	3	1	8	0	17	160	8259917824	-195162496	465493	0	0
	1	144	0	5	2	8	4	3	7	3	23	0	3	1	0	0	6	155	9050136576	-547300736	484066	0	0
	3	141	0	4	3	4	2	6	14	0	15	1	1	3	5	0	0	67	8430225920	-692072064	506519	0	0
	2	141	4	1	6	2	4	4	1	5	18	0	2	2	8	0	19	129	9577373696	-785809600	495664	0	0
	2	175	0	5	4	18	0	7	1	0	13	0	11	0	8	0	10	99	8065393152	-165288832	463814	0	0
	2	144	1	4	1	8	4	4	7	3	25	0	2	2	1	1	6	158	9260156928	-622863744	481386	0	0
	2	147	1	4	0	6	2	6	8	3	24	0	5	1	0	0	6	158	9357636608	-757426496	495349	0	0
	4	81	0	5	5	5	0	5	4	0	11	1	3	1	8	0	19	145	8308177920	-561819904	489194	0	0
	3	147	4	1	6	2	6	4	2	5	17	0	2	2	8	0	19	125	9752757248	-801390400	490679	0	0
	3	147	4	1	6	0	5	4	2	5	17	0	2	2	8	0	19	111	9810606080	-1003767680	518466	0	0
	3	141	0	4	2	0	2	5	14	0	15	1	0	5	5	0	0	67	9020439552	-933688448	553094	0	0
	3	145	0	4	3	12	1	5	6	3	23	0	4	1	0	0	6	159	9121055744	-346069312	467054	0	0
	3	116	1	4	5	6	4	4	8	1	29	0	4	1	6	0	17	173	8315349504	-169928432	458895	0	0
	4	74	0	4	5	3	0	4	6	1	9	1	4	1	8	0	18	134	8250084864	-210310112	471329	0	0
	3	141	0	4	3	0	2	5	14	0	15	1	0	5	5	0	0	70	9021963264	-934466944	552729	0	0
	3	141	0	4	4	4	2	6	14	0	15	1	1	3	5	0	1	83	8423929856	-664271104	501415	0	0
	3	147	4	1	6	0	5	4	2	5	17	0	2	2	8	0	19	113	9811935232	-1004457408	518143	0	0
	4	82	0	4	4	5	0	5	7	0	11	1	3	1	8	0	18	172	8351905280	-600610304	486027	0	0
	3	147	0	4	3	5	2	5	14	0	14	1	1	3	5	0	1	114	8364839936	-643022848	497377	0	0
	1	145	0	4	0	2	1	5	7	3	25	0	4	1	0	0	4	95	9242179584	-850667776	508702	0	0
	4	81	1	4	5	6	0	7	7	0	11	1	3	1	8	0	18	172	8405611008	-526610496	478861	0	0
	3	147	4	1	6	0	6	4	2	4	17	0	2	2	8	0	19	79	9445194752	-1000767168	510175	0	0
	4	76	1	3	5	3	0	4	5	1	8	1	4	1	8	0	18	134	8218054656	-238873024	472147	0	0
	3	107	1	4	5	6	4	4	10	2	29	0	4	0	6	0	17	173	8938802176	-522944256	475814	0	0
	3	147	4	1	6	0	6	4	2	5	18	0	2	2	8	0	19	121	9827894272	-1015250816	505233	0	0
	3	121	0	4	5	1	5	4	14	0	14	1	4	1	1	0	4	188	8709153792	-901225792	509538	0	0
	2	139	1	4	0	6	1	5	7	3	24	0	4	1	0	0	6	158	9211270144	-732481408	487457	0	0
	4	82	1	3	3	5	1	5	7	1	11	1	3	1	8	0	17	169	8551382528	-194994176	460332	0	0
	3	147	4	1	6	1	6	4	2	4	17	0	2	2	8	0	19	79	9396915200	-884888320	502144	0	0
	2	176	1	4	0	20	1	4	0	3	12	0	12	0	8	0	8	97	8650428416	-360693696	471906	0	0
	4	83	0	4	4	5	0	5	8	0	11	1	3	1	8	0	17	134	8322378240	-588284672	491956	0	0
	2	139	1	4	1	5	1	5	7	3	24	0	4	1	1	0	6	149	9204936704	-720653440	489214	0	0
	1	145	0	4	2	6	4	3	7	3	24	0	3	1	0	0	6	155	9052079104	-617749120	489056	0	0
	3	145	0	4	3	12	1	5	6	3	24	0	4	1	0	0	7	160	9121932288	-346274688	466959	0	0
	3	145	1	3	3	20	0	7	10	0	25	0	13	0	3	0	15	25	7946643456	-138122016	476131	0	0
	1	152	1	4	0	2	2	6	8	3	24	0	5	1	0	3	6	149	9561322496	-916445952	509585	0	0
	1	142	1	4	1	8	1	5	7	3	25	0	4	1	0	0	6	158	9177859072	-617080576	479365	0	0
	3	141	0	4	4	4	2	6	14	0	15	1	1	3	5	0	0	67	8414941696	-659646848	503584	0	0
	3	145	1	3	3	20	0	7	10	0	25	0	14	0	3	0	16	46	7959844864	-145206112	472810	0	0
	2	145	0	4	3	11	1	5	6	3	23	0	4	1	0	0	6	159	9121264640	-382610304	468380	0	0
	4	81	0	4	4	5	0	5	7	1	11	1	3	1	8	0	18	172	8394359296	-186802016	459834	0	0
	4	81	0	4	5	1	5	4	14	0	15	1	5	1	1	0	4	194	8735928320	-898702976	509070	0	0
	2	175	1	3	3	13	0	4	0	3	14	0	15	0	8	0	9	79	8459486720	-293725568	473410	0	0
	3	139	1	4	0	3	1	5	7	3	24	0	4	1	0	0	5	149	9235596288	-829101248	498268	0	0
	2	147	0	4	3	5	3	4	14	0	13	1	0	6	5	0	1	114	8429993472	-645324160	493589	0	0
	4	76	1	3	5	3	0	4	5	1	8	1	4	1	8	0	18	134	8218054656	-238873024	472147	0	0
	2	175	1	3	4	18	0	7	1	0	12	0	13	0	8	0	8	58	8015321088	-151068832	470013	0	0
	1	145	0	4	0	2	1	5	8	3	24	0	4	1	0	3	6	159	9486565376	-869318272	501220	0	0
--------------------------------------------------
#Generation	No.	-->37
#Variable_vector	Fitness_vector	Constraint_violation	Overall_penalty
	2	175	1	3	4	18	0	7	1	0	12	0	13	0	8	0	8	58	8015321088	-151068832	470013	0	0
	2	176	1	4	4	12	1	4	0	3	12	0	11	0	8	0	8	99	8655080448	-279171264	469055	0	0
	4	78	0	5	5	5	0	4	5	1	8	1	3	1	8	0	17	160	8259917824	-195162496	465493	0	0
	1	144	0	5	2	8	4	3	7	3	23	0	3	1	0	0	6	155	9050136576	-547300736	484066	0	0
	3	141	0	4	3	4	2	6	14	0	15	1	1	3	5	0	0	67	8430225920	-692072064	506519	0	0
	2	141	4	1	6	2	4	4	1	5	18	0	2	2	8	0	19	129	9577373696	-785809600	495664	0	0
	2	175	0	5	4	18	0	7	1	0	13	0	11	0	8	0	10	99	8065393152	-165288832	463814	0	0
	2	144	1	4	1	8	4	4	7	3	25	0	2	2	1	1	6	158	9260156928	-622863744	481386	0	0
	2	147	1	4	0	6	2	6	8	3	24	0	5	1	0	0	6	158	9357636608	-757426496	495349	0	0
	4	81	0	5	5	5	0	5	4	0	11	1	3	1	8	0	19	145	8308177920	-561819904	489194	0	0
	3	147	4	1	6	2	6	4	2	5	17	0	2	2	8	0	19	125	9752757248	-801390400	490679	0	0
	3	141	0	4	2	0	2	5	14	0	15	1	0	5	5	0	0	67	9020439552	-933688448	553094	0	0
	3	145	0	4	3	12	1	5	6	3	23	0	4	1	0	0	6	159	9121055744	-346069312	467054	0	0
	3	116	1	4	5	6	4	4	8	1	29	0	4	1	6	0	17	173	8315349504	-169928432	458895	0	0
	4	74	0	4	5	3	0	4	6	1	9	1	4	1	8	0	18	134	8250084864	-210310112	471329	0	0
	3	141	0	4	3	0	2	5	14	0	15	1	0	5	5	0	0	70	9021963264	-934466944	552729	0	0
	3	141	0	4	4	4	2	6	14	0	15	1	1	3	5	0	1	83	8423929856	-664271104	501415	0	0
	3	147	4	1	6	0	5	4	2	5	17	0	2	2	8	0	19	113	9811935232	-1004457408	518143	0	0
	4	82	0	4	4	5	0	5	7	0	11	1	3	1	8	0	18	172	8351905280	-600610304	486027	0	0
	4	81	1	4	5	6	0	7	7	0	11	1	3	1	8	0	18	172	8405611008	-526610496	478861	0	0
	3	147	4	1	6	0	6	4	2	4	17	0	2	2	8	0	19	79	9445194752	-1000767168	510175	0	0
	4	76	1	3	5	3	0	4	5	1	8	1	4	1	8	0	18	134	8218054656	-238873024	472147	0	0
	3	107	1	4	5	6	4	4	10	2	29	0	4	0	6	0	17	173	8938802176	-522944256	475814	0	0
	3	147	4	1	6	0	6	4	2	5	18	0	2	2	8	0	19	121	9827894272	-1015250816	505233	0	0
	4	82	1	3	3	5	1	5	7	1	11	1	3	1	8	0	17	169	8551382528	-194994176	460332	0	0
	2	176	1	4	0	20	1	4	0	3	12	0	12	0	8	0	8	97	8650428416	-360693696	471906	0	0
	4	83	0	4	4	5	0	5	8	0	11	1	3	1	8	0	17	134	8322378240	-588284672	491956	0	0
	2	139	1	4	1	5	1	5	7	3	24	0	4	1	1	0	6	149	9204936704	-720653440	489214	0	0
	1	145	0	4	2	6	4	3	7	3	24	0	3	1	0	0	6	155	9052079104	-617749120	489056	0	0
	3	145	0	4	3	12	1	5	6	3	24	0	4	1	0	0	7	160	9121932288	-346274688	466959	0	0
	3	145	1	3	3	20	0	7	10	0	25	0	13	0	3	0	15	25	7946643456	-138122016	476131	0	0
	1	152	1	4	0	2	2	6	8	3	24	0	5	1	0	3	6	149	9561322496	-916445952	509585	0	0
	1	142	1	4	1	8	1	5	7	3	25	0	4	1	0	0	6	158	9177859072	-617080576	479365	0	0
	3	141	0	4	4	4	2	6	14	0	15	1	1	3	5	0	0	67	8414941696	-659646848	503584	0	0
	3	145	1	3	3	20	0	7	10	0	25	0	14	0	3	0	16	46	7959844864	-145206112	472810	0	0
	2	145	0	4	3	11	1	5	6	3	23	0	4	1	0	0	6	159	9121264640	-382610304	468380	0	0
	4	81	0	4	4	5	0	5	7	1	11	1	3	1	8	0	18	172	8394359296	-186802016	459834	0	0
	2	175	1	3	3	13	0	4	0	3	14	0	15	0	8	0	9	79	8459486720	-293725568	473410	0	0
	4	76	1	3	5	3	0	4	5	1	8	1	4	1	8	0	18	134	8218054656	-238873024	472147	0	0
	2	147	1	4	1	5	1	6	8	3	24	0	5	1	0	0	6	158	9406156800	-745055680	485783	0	0
	3	141	0	4	3	3	2	5	14	0	15	1	0	5	6	0	0	67	8574184448	-735316864	519909	0	0
	3	140	4	1	6	2	6	4	1	5	17	0	1	2	8	0	19	122	9643533312	-797893312	491500	0	0
	3	147	0	4	3	5	2	5	14	0	13	1	1	3	5	0	1	114	8330523136	-643022848	495962	0	0
	2	147	0	4	3	5	4	4	14	0	14	1	0	6	5	0	1	114	8484197376	-645607232	491006	0	0
	4	81	1	4	5	6	0	5	8	0	11	1	3	1	8	0	18	172	8245329408	-515883104	479423	0	0
	4	81	0	4	4	5	0	7	6	1	11	1	3	1	8	0	18	172	8617312256	-196884112	461723	0	0
	2	147	1	4	0	6	2	6	8	3	24	0	5	1	0	0	6	158	9357636608	-757426496	495349	0	0
	2	139	1	4	0	6	1	5	7	3	24	0	4	1	0	0	6	158	9211270144	-732481408	487457	0	0
	3	147	4	1	6	0	5	4	2	5	17	0	2	2	8	0	18	113	9810454528	-1003873344	518416	0	0
	3	123	0	4	5	1	6	4	14	0	14	1	4	1	1	0	4	188	8692953088	-907238976	498150	0	0
--------------------------------------------------
#Generation	No.	-->38
#Variable_vector	Fitness_vector	Constraint_violation	Overall_penalty
	2	176	1	4	4	12	1	4	0	3	12	0	11	0	8	0	8	99	8655080448	-279171264	469055	0	0
	1	144	0	5	2	8	4	3	7	3	23	0	3	1	0	0	6	155	9050136576	-547300736	484066	0	0
	3	141	0	4	3	4	2	6	14	0	15	1	1	3	5	0	0	67	8430225920	-692072064	506519	0	0
	2	141	4	1	6	2	4	4	1	5	18	0	2	2	8	0	19	129	9577373696	-785809600	495664	0	0
	2	175	0	5	4	18	0	7	1	0	13	0	11	0	8	0	10	99	8065393152	-165288832	463814	0	0
	2	144	1	4	1	8	4	4	7	3	25	0	2	2	1	1	6	158	9260156928	-622863744	481386	0	0
	2	147	1	4	0	6	2	6	8	3	24	0	5	1	0	0	6	158	9357636608	-757426496	495349	0	0
	4	81	0	5	5	5	0	5	4	0	11	1	3	1	8	0	19	145	8308177920	-561819904	489194	0	0
	3	147	4	1	6	2	6	4	2	5	17	0	2	2	8	0	19	125	9752757248	-801390400	490679	0	0
	3	141	0	4	2	0	2	5	14	0	15	1	0	5	5	0	0	67	9020439552	-933688448	553094	0	0
	3	145	0	4	3	12	1	5	6	3	23	0	4	1	0	0	6	159	9121055744	-346069312	467054	0	0
	4	74	0	4	5	3	0	4	6	1	9	1	4	1	8	0	18	134	8250084864	-210310112	471329	0	0
	3	141	0	4	3	0	2	5	14	0	15	1	0	5	5	0	0	70	9021963264	-934466944	552729	0	0
	3	141	0	4	4	4	2	6	14	0	15	1	1	3	5	0	1	83	8423929856	-664271104	501415	0	0
	4	81	1	4	5	6	0	7	7	0	11	1	3	1	8	0	18	172	8405611008	-526610496	478861	0	0
	3	147	4	1	6	0	6	4	2	4	17	0	2	2	8	0	19	79	9445194752	-1000767168	510175	0	0
	4	76	1	3	5	3	0	4	5	1	8	1	4	1	8	0	18	134	8218054656	-238873024	472147	0	0
	3	107	1	4	5	6	4	4	10	2	29	0	4	0	6	0	17	173	8938802176	-522944256	475814	0	0
	3	147	4	1	6	0	6	4	2	5	18	0	2	2	8	0	19	121	9827894272	-1015250816	505233	0	0
	4	82	1	3	3	5	1	5	7	1	11	1	3	1	8	0	17	169	8551382528	-194994176	460332	0	0
	2	176	1	4	0	20	1	4	0	3	12	0	12	0	8	0	8	97	8650428416	-360693696	471906	0	0
	3	145	0	4	3	12	1	5	6	3	24	0	4	1	0	0	7	160	9121932288	-346274688	466959	0	0
	3	145	1	3	3	20	0	7	10	0	25	0	13	0	3	0	15	25	7946643456	-138122016	476131	0	0
	1	152	1	4	0	2	2	6	8	3	24	0	5	1	0	3	6	149	9561322496	-916445952	509585	0	0
	3	141	0	4	4	4	2	6	14	0	15	1	1	3	5	0	0	67	8414941696	-659646848	503584	0	0
	3	145	1	3	3	20	0	7	10	0	25	0	14	0	3	0	16	46	7959844864	-145206112	472810	0	0
	2	145	0	4	3	11	1	5	6	3	23	0	4	1	0	0	6	159	9121264640	-382610304	468380	0	0
	4	81	0	4	4	5	0	5	7	1	11	1	3	1	8	0	18	172	8394359296	-186802016	459834	0	0
	2	175	1	3	3	13	0	4	0	3	14	0	15	0	8	0	9	79	8459486720	-293725568	473410	0	0
	4	76	1	3	5	3	0	4	5	1	8	1	4	1	8	0	18	134	8218054656	-238873024	472147	0	0
	2	147	1	4	1	5	1	6	8	3	24	0	5	1	0	0	6	158	9406156800	-745055680	485783	0	0
	3	140	4	1	6	2	6	4	1	5	17	0	1	2	8	0	19	122	9643533312	-797893312	491500	0	0
	3	147	0	4	3	5	2	5	14	0	13	1	1	3	5	0	1	114	8330523136	-643022848	495962	0	0
	2	147	0	4	3	5	4	4	14	0	14	1	0	6	5	0	1	114	8484197376	-645607232	491006	0	0
	4	81	1	4	5	6	0	5	8	0	11	1	3	1	8	0	18	172	8245329408	-515883104	479423	0	0
	2	147	1	4	0	6	2	6	8	3	24	0	5	1	0	0	6	158	9357636608	-757426496	495349	0	0
	3	147	4	1	6	0	5	4	2	5	17	0	2	2	8	0	18	113	9810454528	-1003873344	518416	0	0
[truncated: 103,999 more rows]
