# Supplementary material
Source: MDPI journal article supplement (https://www.mdpi.com/1996-1073/8/4/2924)
Supplement: s2 [file s2]

## Sheet: SOLAR
Type group	Type number	Useful gain [kWh/ m2day]	Intercept of the collector efficiency [-]	Negative of the slope of the collector efficiency [W/m2℃]	Flow rate of the fluid at standard condition [kg/s]	Overall height [m]	Overall width [m]	Lifetime [years]	Initial cost [1,000 KRW/m2]	Maintenance ratio against the initial cost [%]
A	0	2.228	0.72	4.09	0.04	2	1	20	1012	2
A	1	2.361	0.7208	4.7999	0.0373	2	1	20	1012	2
A	2	2.417	0.7445	4.8483	0.0381	2	1	20	1012	2
A	3	2.444	0.7043	4.5368	0.0368	2	0.99	20	1012	2
A	4	2.556	0.7203	3.9488	0.0533	2.4	1.18	20	1012	2

## Sheet: HWHB
Type group	Type number	Rated heating capacity [kW]	Rated efficiency [%]	Lifetime [years]	Initial cost [1,000 KRW/ea.]	Maintenance ratio against the initial cost [%]
A	0	58.15	82.5	15	2629	1.5
A	1	81.41	85.2	15	2932.6	1.5
A	2	116.3	83.2	15	3639.9	1.5
A	3	174.45	85.9	15	4247.1	1.5
A	4	232.6	83.4	15	4551.8	1.5

## Sheet: HLHB
Type group	Type number	Rated heating capacity [kW]	Rated efficiency [%]	Lifetime [years]	Initial cost [1,000 KRW/ea.]	Maintenance ratio against the initial cost [%]
A	0	116.3	91	15	18975	1.5
A	1	244.23	91	15	22264	1.5
A	2	348.9	91	15	26312	1.5
A	3	465.2	91	15	30739.5	1.5
A	4	581.5	91	15	33143	1.5
A	5	697.8	91	15	36052.5	1.5
A	6	930.4	91	15	39721	1.5
A	7	1163	91	15	40075.2	1.5
A	8	1395.6	91	15	44022	1.5

## Sheet: HLSB
Type group	Type number	Rated heating capacity [kW]	Rated efficiency [%]	Lifetime [years]	Initial cost [1,000 KRW/ea.]	Maintenance ratio against the initial cost [%]
A	0	74.862	88	15	9614	1.5
A	1	149.725	88	15	11283.8	1.5
A	2	224.587	88	15	12587.3	1.5
A	3	299.45	88	15	16951	1.5
A	4	374.312	88	15	26312	1.5
A	5	449.174	88	15	29854	1.5
B	6	598.899	91	15	30866	1.5
B	8	748.624	91	15	33333.3	1.5
B	10	1122.93	91	15	38456	1.5
B	12	1497.25	91	15	56381.6	1.5
B	14	1871.56	91	15	58443	1.5
B	16	2245.87	91	15	60277.8	1.5
C	7	598.899	99	15	38203	1.5
C	9	748.624	99	15	44401.5	1.5
C	11	1122.93	99	15	49082	1.5
C	13	1497.25	99	15	62111.5	1.5
C	15	1871.56	99	15	65780	1.5
C	17	2245.87	99	15	69448.5	1.5

## Sheet: EHP
Type group	Type number	Rated cooling capacity [kW]	Rated heating capacity [kW]	Rated power consumption in cooling mode [kW]	Rated power consumption in heating mode [kW]	Rated COP in cooling mode [-]	Rated COP in heating mode [-]	Lifetime [years]	Initial cost [1,000 KRW/ea.]	Maintenance ratio against the initial cost [%]
A	0	21.5	25.9	5.55	6.5	3.88	3.99	10	5769	1.5
A	1	27.1	32.6	7.31	8.46	3.71	3.86	10	6446	1.5
A	2	32.6	39.2	9.66	10.5	3.38	3.74	10	7329	1.5
A	3	38	45.7	9.85	10.9	3.86	4.2	10	8700	1.5
A	4	43.4	52.2	11.29	12.6	3.85	4.15	10	10380	1.5
A	5	48.8	58.7	13.73	14.7	3.56	4	10	10614	1.5
A	6	51.9	65	16.26	16.5	3.2	3.94	10	10796	1.5

## Sheet: GSHP
Type group	Type number	Rated cooling capacity [kW]	Rated heating capacity [kW]	Rated power consumption in cooling mode [kW]	Rated power consumption in heating mode [kW]	Rated COP in cooling mode [-]	Rated COP in heating mode [-]	Lifetime [years]	Initial cost [1,000 KRW/ea.]	Maintenance ratio against the initial cost [%]
A	0	95.9	94.7	19.3	24.4	4.97	3.89	15	22170	1.5
A	1	114.7	109.4	22.1	28.4	5.2	3.86	15	34650	1.5
A	2	118.8	111.7	24.4	29.4	4.87	3.8	15	22220	1.5
A	3	156.3	149.4	33.7	42.9	4.64	3.49	15	33550	1.5
A	4	157.1	150.5	30.2	38.5	5.21	3.91	15	40810	1.5
A	5	174.6	171.8	36.6	45.1	4.78	3.81	15	37950	1.5
A	6	182.2	176.1	35.7	45.9	5.11	3.84	15	49500	1.5
A	7	186.6	194.4	40.1	49.7	4.66	3.92	15	42042	1.5
A	8	191.3	207.5	39	49.1	4.91	4.23	15	54054	1.5
A	9	297.6	301.8	68.5	87.1	4.35	3.47	15	78650	1.5

## Sheet: VCCC
Type group	Type number	Rated cooling capacity [kW]	Rated COP [-]	Lifetime [years]	Initial cost [1,000 KRW/ea.]	Maintenance ratio against the initial cost [%]
A	0	259	6.829	20	126720	1.5
A	1	285	6.636	20	131670	1.5
A	2	323	6.829	20	139590	1.5
A	3	358	6.537	20	148500	1.5
A	4	390	6.586	20	154440	1.5
A	5	423	6.441	20	157410	1.5
A	6	468	6.574	20	160380	1.5
A	7	502	6.523	20	172260	1.5
A	8	548	6.712	20	181170	1.5
A	9	582	6.465	20	193050	1.5
A	10	621	6.181	20	202950	1.5
A	11	741	6.869	20	226710	1.5
A	12	870	6.803	20	242550	1.5
A	13	900	6.712	20	246510	1.5
A	14	936	6.686	20	255420	1.5

## Sheet: SFAC
Type group	Type number	Rated cooling capacity [kW]	Rated COP [-]	Lifetime [years]	Initial cost [1,000 KRW/ea.]	Maintenance ratio against the initial cost [%]
A	0	351.628	1.21	20	95480.8	2
A	2	421.953	1.21	20	99203.2	2
A	4	527.442	1.21	20	106260	2
A	6	632.93	1.21	20	111623	2
A	8	738.419	1.21	20	123640	2
A	10	843.907	1.21	20	125921	2
A	12	984.558	1.21	20	149490	2
A	14	1160.37	1.21	20	155760	2
A	16	1265.86	1.21	20	160153	2
A	18	1406.51	1.21	20	175230	2
A	20	1582.33	1.21	20	190758	2
A	22	1758.14	1.21	20	209924	2
A	24	1969.12	1.21	20	233905	2
A	26	2215.26	1.21	20	264550	2
A	28	2461.39	1.21	20	275990	2
B	1	351.628	1.36	20	94380	2
B	3	421.953	1.36	20	97790	2
B	5	527.442	1.36	20	108570	2
B	7	632.93	1.36	20	112860	2
B	9	738.419	1.36	20	127930	2
B	11	843.907	1.36	20	132220	2
B	13	984.558	1.36	20	154330	2
B	15	1160.37	1.36	20	161370	2
B	17	1265.86	1.36	20	179190	2
B	19	1406.51	1.36	20	184910	2
B	21	1582.33	1.36	20	204820	2
B	23	1758.14	1.36	20	222970	2
B	25	1969.12	1.36	20	267850	2
B	27	2215.26	1.36	20	275770	2
B	29	2461.39	1.36	20	287650	2

## Sheet: PV
Type group	Type number	Maximum power [W]	Open circuit voltage [V]	Short circuit current [A]	Voltage at maximum power [V]	Current at maximum power [A]	Module efficiency [%]	Normal operating cell temperature [℃]	Temperature coefficient of power [%/℃]	Temperature coefficient of voltage [%/℃]	Temperature coefficient of current [%/℃]	Overall height [m]	Overall width [m]	Lifetime [years]	Initial cost [1,000 KRW/kW]	Maintenance ratio against the initial cost [%]
A	0	230	36.8	8.34	30	7.67	13.9	45±3	-0.45	-0.32	0.04	1.652	1	20	4972	1
A	1	235	36.8	8.44	30.1	7.81	14.2	45±3	-0.45	-0.32	0.04	1.652	1	20	4972	1
A	3	240	37	8.54	30.2	7.95	14.5	45±3	-0.45	-0.32	0.04	1.652	1	20	4972	1
A	5	245	37.1	8.64	30.3	8.08	14.8	45±3	-0.45	-0.32	0.04	1.652	1	20	4972	1
A	7	250	37.2	8.74	30.4	8.22	15.1	45±3	-0.45	-0.32	0.04	1.652	1	20	4972	1
A	9	255	37.4	8.85	30.5	8.35	15.4	45±3	-0.45	-0.32	0.04	1.652	1	20	4972	1
B	10	275	44.1	8.35	36.1	7.62	14	45±3	-0.45	-0.32	0.04	1.966	1	20	4972	1
B	11	280	44.3	8.4	36.1	7.76	14.3	45±3	-0.45	-0.32	0.04	1.966	1	20	4972	1
B	12	285	44.5	8.45	36.2	7.87	14.5	45±3	-0.45	-0.32	0.04	1.966	1	20	4972	1
B	14	290	44.7	8.5	36.3	7.99	14.7	45±3	-0.45	-0.32	0.04	1.966	1	20	4972	1
B	16	295	44.9	8.55	36.4	8.11	15	45±3	-0.45	-0.32	0.04	1.966	1	20	4972	1
B	18	300	45	8.6	36.5	8.22	15.2	45±3	-0.43	-0.31	0.05	1.966	1	20	4972	1
C	2	240	37.3	8.58	30	8.02	14.42	45±3	-0.43	-0.31	0.05	1.665	0.999	20	4972	1
C	4	245	37.4	8.63	30.4	8.08	14.72	45±3	-0.43	-0.31	0.05	1.665	0.999	20	4972	1
C	6	250	37.5	8.67	30.8	8.14	15.03	45±3	-0.43	-0.31	0.05	1.665	0.999	20	4972	1
C	8	255	38	8.84	30.9	8.27	15.33	45±3	-0.43	-0.31	0.05	1.665	0.999	20	4972	1
D	13	290	44.7	8.58	36.2	8.02	14.62	45±3	-0.43	-0.31	0.05	1.985	0.999	20	4972	1
D	15	295	45	8.67	36.3	8.14	14.87	45±3	-0.43	-0.31	0.05	1.985	0.999	20	4972	1
D	17	300	45.1	8.85	36.3	8.27	15.12	45±3	-0.43	-0.31	0.05	1.985	0.999	20	4972	1
D	19	305	45.6	8.92	36.5	8.36	15.38	45±3	-0.43	-0.31	0.05	1.985	0.999	20	4972	1
